# Supplementary material for: Human Cancer Long Non-Coding RNA Transcriptomes
Source: PLoS One. 2011 Oct 3;6(10):e25915. doi: 10.1371/journal.pone.0025915 (PMC3185064; doi:10.1371/journal.pone.0025915)
Supplement: Table S1 — GEO Libraries. (XLSX) [file pone.0025915.s004.xlsx]

## Sheet: GEO Libraries
Supplementary Table 1 - GEO libraries
GEO	SAGE Library Name
GSM383679	SAGE_Bone_Marrow_AML_FS_CD34+CD38+		GEO downloaded libraries.
GSM383680	SAGE_Bone_marrow_AML_FS_CD34+CD38+
GSM383682	SAGE_Bone_marrow_normal_AP_CD34+/CD38-/lin-
GSM383683	SAGE_Bone_marrow_normal_AP_CD34+/CD38+/lin+
GSM383684	SAGE_Bone_marrow_normal_B_D01
GSM383686	SAGE_Brain_astrocyte_normal_CL_NHA5
GSM383687	SAGE_Brain_astrocytoma_grade_I_B_H1043
GSM383688	SAGE_Brain_astrocytoma_grade_II_B_H127
GSM383689	SAGE_Brain_astrocytoma_grade_II_B_H359
GSM383690	SAGE_Brain_astrocytoma_grade_II_B_H388
GSM383691	SAGE_Brain_astrocytoma_grade_II_B_H501
GSM383692	SAGE_Brain_astrocytoma_grade_II_B_H516
GSM383693	SAGE_Brain_astrocytoma_grade_II_B_H518
GSM383694	SAGE_Brain_astrocytoma_grade_II_B_H530
GSM383695	SAGE_Brain_astrocytoma_grade_II_B_H563
GSM383696	SAGE_Brain_astrocytoma_grade_III_B_343
GSM383697	SAGE_Brain_astrocytoma_grade_III_B_407
GSM383698	SAGE_Brain_astrocytoma_grade_III_B_439
GSM383699	SAGE_Brain_astrocytoma_grade_III_B_584
GSM383700	SAGE_Brain_astrocytoma_grade_III_B_828
GSM383701	SAGE_Brain_astrocytoma_grade_III_B_H1020
GSM383702	SAGE_Brain_astrocytoma_grade_III_B_H1055
GSM383703	SAGE_Brain_astrocytoma_grade_III_B_H272
GSM383704	SAGE_Brain_astrocytoma_grade_III_B_H970
GSM383705	SAGE_Brain_astrocytoma_grade_III_B_R140
GSM383706	SAGE_Brain_astrocytoma_grade_III_B_R927
GSM383707	SAGE_Brain_ependymoblastoma_B_819
GSM383708	SAGE_Brain_ependymoma_B_1150
GSM383709	SAGE_Brain_ependymoma_B_1394
GSM383710	SAGE_Brain_ependymoma_B_239
GSM383711	SAGE_Brain_ependymoma_B_H580
GSM383712	SAGE_Brain_ependymoma_B_R1023
GSM383713	SAGE_Brain_ependymoma_B_R353
GSM383714	SAGE_Brain_ependymoma_B_R455
GSM383715	SAGE_Brain_ependymoma_B_R510
GSM383716	SAGE_Brain_ependymoma_B_R512
GSM383717	SAGE_Brain_ependymoma_B_R582
GSM383718	SAGE_Brain_ependymoma_B_R628
GSM383719	SAGE_Brain_fetal_normal_B_S1
GSM383720	SAGE_Brain_glioblastoma_B_GBM1062
GSM383721	SAGE_Brain_glioblastoma_B_H1110
GSM383722	SAGE_Brain_glioblastoma_B_H1353
GSM383723	SAGE_Brain_glioblastoma_B_H1371
GSM383724	SAGE_Brain_glioblastoma_B_H1425C
GSM383725	SAGE_Brain_glioblastoma_B_H833
GSM383726	SAGE_Brain_glioblastoma_B_pooled
GSM383727	SAGE_Brain_glioblastoma_B_R20
GSM383728	SAGE_Brain_glioblastoma_B_R336
GSM383729	SAGE_Brain_glioblastoma_B_R70
GSM383730	SAGE_Brain_glioblastoma_CL_28d
GSM383731	SAGE_Brain_glioblastoma_CL_4d
GSM383732	SAGE_Brain_glioblastoma_CL_H392
GSM383733	SAGE_Brain_glioblastoma_CL_H54+EGFRvIII
GSM383734	SAGE_Brain_glioblastoma_CL_H54+LacZ
GSM383735	SAGE_Brain_glioblastoma_CL_stem_cells
GSM383736	SAGE_Brain_glioblastoma_control_CL_H247
GSM383737	SAGE_Brain_glioblastoma_CS_TA2
GSM383738	SAGE_Brain_glioblastoma_hypoxia_CL_H247
GSM383739	SAGE_Brain_medulloblastoma_B_1273
GSM383740	SAGE_Brain_medulloblastoma_B_96-04-P019
GSM383741	SAGE_Brain_medulloblastoma_B_97-05-P015
GSM383742	SAGE_Brain_medulloblastoma_B_97-05-P312
GSM383743	SAGE_Brain_medulloblastoma_B_98-04-P117
GSM383744	SAGE_Brain_medulloblastoma_B_98-04-P494
GSM383745	SAGE_Brain_medulloblastoma_B_98-05-P040
GSM383746	SAGE_Brain_medulloblastoma_B_98-05-P608
GSM383747	SAGE_Brain_medulloblastoma_B_98-09-P558
GSM383748	SAGE_Brain_medulloblastoma_B_98-13-P301
GSM383749	SAGE_Brain_medulloblastoma_B_C609
GSM383750	SAGE_Brain_medulloblastoma_B_DL5
GSM383751	SAGE_Brain_medulloblastoma_B_DL7
GSM383752	SAGE_Brain_medulloblastoma_B_H1322
GSM383753	SAGE_Brain_medulloblastoma_B_H1413
GSM383754	SAGE_Brain_medulloblastoma_B_H275
GSM383755	SAGE_Brain_medulloblastoma_B_H306
GSM383756	SAGE_Brain_medulloblastoma_B_H484
GSM383757	SAGE_Brain_medulloblastoma_B_H876
GSM383758	SAGE_Brain_medulloblastoma_B_H972
GSM383759	SAGE_Brain_Medulloblastoma_CL_425C2
GSM383760	SAGE_Brain_Medulloblastoma_CL_425Otx2siRNA
GSM383761	SAGE_Brain_medulloblastoma_CL_4-HCR
GSM383762	SAGE_Brain_medulloblastoma_CL_D283
GSM383763	SAGE_Brain_medulloblastoma_CL_H341
GSM383764	SAGE_Brain_medulloblastoma_CL_mhh-1
GSM383765	SAGE_Brain_Medulloblastoma_CL_UW228-N
GSM383766	SAGE_Brain_Medulloblastoma_CL_UW228-V2
GSM383767	SAGE_Brain_meningioma_grade_I_B_SF4271
GSM383768	SAGE_Brain_meningioma_grade_I_B_SF4465
GSM383769	SAGE_Brain_meningioma_grade_II_B_SF2176
GSM383770	SAGE_Brain_meningioma_grade_II_B_SF3622
GSM383771	SAGE_Brain_meningioma_grade_III_B_SF2366
GSM383772	SAGE_Brain_normal_cerebellum_B_1
GSM383773	SAGE_Brain_normal_cerebellum_B_BB542
GSM383774	SAGE_Brain_normal_cortex_B_BB542
GSM383775	SAGE_Brain_normal_cortex_B_pool6
GSM383776	SAGE_Brain_normal_leptomeninges_B_AL2
GSM383777	SAGE_Brain_normal_peds_cortex_B_H1571
GSM383778	SAGE_Brain_normal_substantia_nigra_B_1
GSM383779	SAGE_Brain_normal_thalamus_B_1
GSM383780	SAGE_Brain_oligodendroglioma_B_1001
GSM383781	SAGE_Brain_oligodendroglioma_B_H988
GSM383782	SAGE_Breast_carcinoma_associated_myoepithelium_CD10+_AP_DCIS6
GSM383783	SAGE_Breast_carcinoma_associated_myoepithelium_CD10+_AP_DCIS7
GSM383784	SAGE_Breast_carcinoma_associated_myofibroblast_CD10+_AP_IDC7
GSM383785	SAGE_Breast_carcinoma_associated_myofibroblast_CD10+_AP_IDC8
GSM383786	SAGE_Breast_carcinoma_associated_myofibroblast_CD10+_AP_IDC9
GSM383787	SAGE_Breast_carcinoma_associated_stroma_B_DCIS6
GSM383788	SAGE_Breast_carcinoma_associated_stroma_B_IDC7
GSM383789	SAGE_Breast_carcinoma_B_95-259
GSM383790	SAGE_Breast_carcinoma_B_95-347
GSM383791	SAGE_Breast_carcinoma_B_BWHT18_DCIS
GSM383792	SAGE_Breast_carcinoma_B_CT15_IDC
GSM383793	SAGE_Breast_carcinoma_B_DCIS-4
GSM383794	SAGE_Breast_carcinoma_B_DCIS-5
GSM383795	SAGE_Breast_carcinoma_B_IDC-3
GSM383796	SAGE_Breast_carcinoma_B_IDC-4
GSM383797	SAGE_Breast_carcinoma_B_IDC-5
GSM383798	SAGE_Breast_carcinoma_CL_MCF7control_0h
GSM383799	SAGE_Breast_carcinoma_CL_MCF7estradiol_10H
GSM383800	SAGE_Breast_carcinoma_CL_MCF7estradiol_3h
GSM383801	SAGE_Breast_carcinoma_CL_MDA435C
GSM383802	SAGE_Breast_carcinoma_CL_MDA435H24
GSM383803	SAGE_Breast_carcinoma_CL_MDA435H48
GSM383807	SAGE_Breast_carcinoma_epithelium_BEREP4+_AP_DCIS-2
GSM383808	SAGE_Breast_carcinoma_epithelium_BEREP4+_AP_DCIS-3
GSM383809	SAGE_Breast_carcinoma_epithelium_BEREP4+_AP_DCIS6
GSM383810	SAGE_Breast_carcinoma_epithelium_BEREP4+_AP_DCIS7
GSM383811	SAGE_Breast_carcinoma_epithelium_BerEP4+_AP_IDC8
GSM383812	SAGE_Breast_carcinoma_epithelium_BerEP4+_AP_IDC9
GSM383813	SAGE_Breast_carcinoma_epithelium_BerEP4+AP_IDC7
GSM383814	SAGE_Breast_carcinoma_epithelium_CD24+_AP_IDC26
GSM383815	SAGE_Breast_carcinoma_epithelium_CD24+_AP_IDC28
GSM383816	SAGE_Breast_carcinoma_epithelium_CD24+_AP_PE2
GSM383817	SAGE_Breast_carcinoma_epithelium_CD44+_AP_ASC3
GSM383818	SAGE_Breast_carcinoma_epithelium_CD44+_AP_PE2
GSM383819	SAGE_Breast_carcinoma_epithelium_PROCR+_AP_IDC28
GSM383820	SAGE_Breast_carcinoma_epithelium_PROCR+_AP_IDC29
GSM383821	SAGE_Breast_carcinoma_epithelium_X_MUC1+_AP
GSM383822	SAGE_Breast_carcinoma_MD_DCIS
GSM383823	SAGE_Breast_carcinoma_MD_LCIS
GSM383824	SAGE_Breast_carcinoma_metastasis_B_2
GSM383825	SAGE_Breast_carcinoma_myoepithelium_X_ITGB6+_AP
GSM383826	SAGE_Breast_fibroadenoma_MD
GSM383827	SAGE_Breast_metastatic_carcinoma_B_LN1
GSM383828	SAGE_Breast_metastatic_carcinoma_B_LN2
GSM383829	SAGE_Breast_normal_B_gestational hyperplasia1
GSM383830	SAGE_Breast_normal_epithelium_BEREP4+_AP_N1
GSM383831	SAGE_Breast_normal_epithelium_BEREP4+_AP_N2
GSM383832	SAGE_Breast_normal_epithelium_CD24+_AP_N15
GSM383833	SAGE_Breast_normal_epithelium_CD24+_AP_N2
GSM383834	SAGE_Breast_normal_epithelium_CD24+_AP_N5
GSM383835	SAGE_Breast_normal_epithelium_CD44+_AP_N2
GSM383836	SAGE_Breast_normal_epithelium_CD44+_AP_N5
GSM383837	SAGE_Breast_normal_epithelium_MUC1+_AP_N15
GSM383838	SAGE_Breast_normal_epithelium_MUC1+_AP_N5
GSM383839	SAGE_Breast_normal_FS_NER
GSM383840	SAGE_Breast_normal_myoepithelium_CD10+_AP_IDC7
GSM383841	SAGE_Breast_normal_myoepithelium_CD10+_AP_N1
GSM383842	SAGE_Breast_normal_myoepithelium_CD10+_AP_N15
GSM383843	SAGE_Breast_normal_myoepithelium_CD10+_AP_N5
GSM383844	SAGE_Breast_normal_myoepithelium_CL_HME50
GSM383845	SAGE_Breast_normal_organoid_B
GSM383846	SAGE_Breast_normal_stroma_AP_1
GSM383847	SAGE_Breast_normal_stroma_B_IDC8
GSM383848	SAGE_Breast_phyllodes_tumor_fibroblasts_AP_070202
GSM383849	SAGE_Cartilage_chondrosarcoma_grade_1_CL_UIIC0
GSM383850	SAGE_Cartilage_chondrosarcoma_grade_2_B_UIGA0
GSM383851	SAGE_Cartilage_chondrosarcoma_grade_2_CL_UIFU0
GSM383852	SAGE_Cartilage_chondrosarcoma_grade_2_CL_UIGE0
GSM383853	SAGE_Cartilage_chondrosarcoma_grade_3_CL_UIIA0
GSM383854	SAGE_Cartilage_dedifferentiated_chondrosarcoma_metastasis_CL_UIEK0
GSM383855	SAGE_Cartilage_dedifferentiated_chondrosarcoma_metastasis_CL_UIFK0
GSM383856	SAGE_Cartilage_dedifferentiated_chondrosarcoma_metastasis_CL_UIGD0
GSM383857	SAGE_Cartilage_dedifferentiated_chondrosarcoma_metastasis_CL_UIGP0
GSM383858	SAGE_Cartilage_dedifferentiated_chondrosarcoma_metastasis_CL_UIGX0
GSM383859	SAGE_Colon_adenocarcinoma_B_Tu102
GSM383860	SAGE_Colon_adenocarcinoma_B_Tu98
GSM383861	SAGE_Colon_adenocarcinoma_CL_Caco2
GSM383862	SAGE_Colon_adenocarcinoma_CL_HCT116
GSM383863	SAGE_Colon_adenocarcinoma_CL_RKO
GSM383864	SAGE_Colon_adenocarcinoma_CL_SW837
GSM383865	SAGE_Colon_carcinoma_CL_Hct116_p53_knockout_Anoxia
GSM383866	SAGE_Colon_carcinoma_CL_Hct116_p53_knockout_Normal_Oxygen
GSM383867	SAGE_Colon_carcinoma_CL_Hct116_wildtype_p53_Anoxia
GSM383868	SAGE_Colon_carcinoma_CL_Hct116_wildtype_p53_Normal_Oxygen
GSM383869	SAGE_Colon_normal_B_NC1
GSM383870	SAGE_Colon_normal_B_NC2
GSM383872	SAGE_Embryonic_stem_cell_BG01_normal_p20_CL_SHE19
GSM383873	SAGE_Embryonic_stem_cell_H1_normal_p31_CL_SHE17
GSM383874	SAGE_Embryonic_stem_cell_H1_normal_p54_CL_SHE16
GSM383875	SAGE_Embryonic_stem_cell_H13_normal_p22_CL_SHE15
GSM383876	SAGE_Embryonic_stem_cell_H14_normal_p22_CL_SHE14
GSM383877	SAGE_Embryonic_stem_cell_H7_normal_p33_CL_SHE13
GSM383878	SAGE_Embryonic_stem_cell_H9_normal_p38_CL_SHES1
GSM383879	SAGE_Embryonic_stem_cell_H9_normal_p38_CL_SHES2
GSM383880	SAGE_Embryonic_stem_cell_HES3_normal_p16_CL_SHE10
GSM383881	SAGE_Embryonic_stem_cell_HES4_normal_p36_CL_SHE11
GSM383882	SAGE_Embryonic_stem_cell_HSF6_normal_p50_CL_SHES9
GSM383884	SAGE_Esophagus_Adenocarcinoma_B_CA1D
GSM383885	SAGE_Esophagus_Dysplasia_B_HGD02
GSM383886	SAGE_Esophagus_Dysplasia_B_LGD01
GSM383887	SAGE_Esophagus_Normal_B_CN01
GSM383888	SAGE_Eye_lens_B_UIHI0
GSM383890	SAGE_Fibroblasts_CL_postcrisis
GSM383892	SAGE_GallBladder_Adenocarcinoma_B_C01
GSM383893	SAGE_GallBladder_Adenocarcinoma_B_HAIIb
GSM383894	SAGE_GallBladder_Adenocarcinoma_B_NAM01
GSM383895	SAGE_GallBladder_Normal_B_HN
GSM383896	SAGE_Heart_normal_B_1
GSM383897	SAGE_Kidney_carcinoma_B_D2
GSM383898	SAGE_Kidney_embryonic_CL_293+beta-catenin
GSM383899	SAGE_Kidney_embryonic_CL_293-control
GSM383900	SAGE_Kidney_Glomeruli_Normal_B_bjballer1
GSM383901	SAGE_Kidney_normal_B_1
GSM383902	SAGE_Leukocytes_normal_B_1
GSM383903	SAGE_Liver_cholangiocarcinoma_B_K1
GSM383904	SAGE_Liver_cholangiocarcinoma_B_K2D
GSM383905	SAGE_Liver_cholangiocarcinoma_CL_K3
GSM383906	SAGE_Liver_cholangiocarcinoma_CL_K4
GSM383907	SAGE_Liver_normal_B_1
GSM383908	SAGE_Lung_adenocarcinoma_B_1
GSM383909	SAGE_Lung_adenocarcinoma_MD_L10
GSM383910	SAGE_Lung_adenocarcinoma_MD_L9
GSM383911	SAGE_Lung_normal_B_1
GSM383912	SAGE_Lung_normal_CL_L15
GSM383913	SAGE_Lung_normal_CL_L16
GSM383914	SAGE_Lung_tumor_associated_chronic_inflammation_B_UIHM0
GSM383915	SAGE_Lymph_Node_Lymphoma_B_1
GSM383918	SAGE_Lymph_Node_normal_B_1
GSM383919	SAGE_Muscle_normal_B_old
GSM383920	SAGE_Muscle_normal_B_young
GSM383921	SAGE_Muscle_Rhabdomyosarcoma_B_1
GSM383922	SAGE_Ovary_adenocarcinoma_B_OVT-6
GSM383923	SAGE_Ovary_adenocarcinoma_B_OVT-7
GSM383924	SAGE_Ovary_adenocarcinoma_B_OVT-8
GSM383925	SAGE_Ovary_carcinoma_CL_A2780
GSM383926	SAGE_Ovary_carcinoma_CL_ES2-1
GSM383927	SAGE_Ovary_cystadenoma_CL_ML10-10
GSM383928	SAGE_Ovary_endometriosis_CL_E12
GSM383929	SAGE_Ovary_normal_CL_IOSE29EC-11
GSM383930	SAGE_Ovary_normal_CS_HOSE_4
GSM383931	SAGE_Pancreas_adenocarcinoma_B_91-16113
GSM383932	SAGE_Pancreas_adenocarcinoma_B_96-6252
GSM383933	SAGE_Pancreas_adenocarcinoma_CL_CAPAN1
GSM383934	SAGE_Pancreas_adenocarcinoma_CL_Panc1
GSM383935	SAGE_Pancreas_carcinoma_CL_ASPC
GSM383936	SAGE_Pancreas_carcinoma_CL_PL45
GSM383937	SAGE_Pancreas_normal_B_1
GSM383938	SAGE_Pancreas_normal_CS_H126
GSM383939	SAGE_Pancreas_normal_CS_HX
GSM383940	SAGE_Pelvis_mixoid_chondrosarcoma_grade2_B_UIHT0
GSM383943	SAGE_Peritoneum_mesothelioma_B_12
GSM383944	SAGE_Peritoneum_normal_B_13
GSM383945	SAGE_Placenta_first_trimester_normal_B_1
GSM383946	SAGE_Placenta_hydatidiform_mole_B_1
GSM383947	SAGE_Placenta_normal_B_1
GSM383948	SAGE_Prostate_adenocarcinoma_CL_LNCaP
GSM383949	SAGE_Prostate_adenocarcinoma_MD_PR317
GSM383950	SAGE_Prostate_carcinoma_B_LN-1
GSM383951	SAGE_Prostate_carcinoma_B_pool2
GSM383952	SAGE_Prostate_carcinoma_CL_A+
GSM383953	SAGE_Prostate_carcinoma_CL_LNCaP
GSM383954	SAGE_Prostate_carcinoma_CL_LNCaP_no-DHT
GSM383955	SAGE_Prostate_carcinoma_CL_LNCaP-C
GSM383956	SAGE_Prostate_carcinoma_CL_LNCaP-T
GSM383957	SAGE_Prostate_carcinoma_CL_PC3_AS2
GSM383958	SAGE_Prostate_carcinoma_CL_PC3_Mock
GSM383959	SAGE_Prostate_normal_B_2
GSM383960	SAGE_Prostate_normal_epithelium_CS_confluent
GSM383961	SAGE_Prostate_normal_epithelium_CS_senescent
GSM383962	SAGE_Prostate_normal_MD_PR317
GSM383963	SAGE_Retina_Macula_normal_B_4Mac
GSM383964	SAGE_Retina_macula_normal_B_HMAC2
GSM383965	SAGE_Retina_normal_B_4cRet
GSM383966	SAGE_Retina_Peripheral_normal_B_1
GSM383967	SAGE_Retina_Peripheral_normal_B_2
GSM383968	SAGE_Retina_Peripheral_normal_B_4Peri
GSM383969	SAGE_Retina_Pigment_epithelium_normal_B_1
GSM383970	SAGE_Retina_Retinoblastoma_B_1
GSM383971	SAGE_Retinal_Pigment_Epithelium_normal_B_4MacRPE
GSM383972	SAGE_Retinal_Pigment_Epithelium_normal_B_4PeriRPE
GSM383973	SAGE_Rheumatoid_arthritis_synovial_fibroblast_CS
GSM383978	SAGE_Skin_melanoma_B_DB1
GSM383979	SAGE_Skin_melanoma_B_DB2
GSM383980	SAGE_Skin_melanoma_B_DB3
GSM383991	SAGE_Skin_normal_B_NS
GSM383992	SAGE_Spinal_cord_normal_B_1
GSM383993	SAGE_Stomach_adenocarcinoma_B_G234
GSM383994	SAGE_Stomach_adenocarcinoma_MD_G329
GSM383995	SAGE_Stomach_adenocarcinoma_MD_HG7
GSM383996	SAGE_Stomach_adenocarcinoma_MD_HS29
GSM383997	SAGE_Stomach_carcinoma_B_G189
GSM383998	SAGE_Stomach_carcinoma_B_xenograft_X101
GSM383999	SAGE_Stomach_carcinoma_B_xenograph_X43
GSM384000	SAGE_Stomach_normal_B_antrum
GSM384001	SAGE_Stomach_normal_epithelium_B_body1
GSM384002	SAGE_Stomach_normal_MD_13S
GSM384003	SAGE_Stomach_normal_MD_14S
GSM384006	SAGE_Testis_Embyronal_Carcinoma_B_1
GSM384007	SAGE_Thyroid_follicular_adenoma_B_TT005
GSM384008	SAGE_Thyroid_follicular_carcinoma_B_TT004
GSM384009	SAGE_Thyroid_normal_B_001
GSM384010	SAGE_Universal_reference_human_RNA_CL
GSM384012	SAGE_Uterus_endometrium_normal_CS_DI1
GSM384015	SAGE_Vascular_endothelium_breast_carcinoma_associated_P1H12+_AP_DCIS6
GSM384016	SAGE_Vascular_endothelium_hemangioma_B_146
GSM384017	SAGE_Vascular_endothelium_normal_breast_associated_P1H12+_AP_1
GSM384018	SAGE_Vascular_endothelium_normal_liver_associated_AP_NLEC1
GSM384019	SAGE_Vascular_normal_CS_control
GSM384020	SAGE_Vascular_normal_CS_VEGF+
GSM384023	SAGE_White_Blood_Cells_breast_carcinoma_associated_CD45+_AP_DCIS6
GSM384024	SAGE_White_Blood_Cells_breast_carcinoma_associated_CD45+_AP_DCIS7
GSM384025	SAGE_White_Blood_Cells_breast_carcinoma_associated_CD45+_AP_IDC7
GSM384026	SAGE_White_Blood_Cells_lung_macrophage_normal_AP_L1
GSM384027	SAGE White Blood Cells monocyte depleted mononuclear cells normal AP A1
GSM384028	SAGE White Blood Cells monocyte depleted mononuclear cells normal AP P1
GSM384029	SAGE_White_Blood_Cells_monocyte_normal_AP_A1
GSM384030	SAGE_White_Blood_Cells_monocyte_normal_AP_P1
GSM384031	SAGE_White_Blood_Cells_monocytes_normal_AP_A2
GSM384032	SAGE_White_Blood_Cells_monocytes_normal_AP_C1
GSM384033	SAGE_White_Blood_Cells_monocytes_normal_AP_P2
GSM384034	SAGE_White_Blood_Cells_normal_breast_associated_CD45+_AP
GSM384035	SAGE_White_Blood_Cells_plaque_macrophage_normal_AP_P1
GSM384036	SAGE_White_Blood_Cells_plaque_macrophage_normal_AP_P2
GSM194375	lung_CIS-1
GSM194376	lung_CIS-2
GSM194377	lung_CIS-3
GSM194378	lung_CIS-4
GSM194379	lung_CIS-5
GSM194380	lung_SqCC-1
GSM194381	lung_SqCC-2
GSM194382	lung_SqCC-3
GSM194383	lung_SqCC-4
GSM194384	lung_SqCC-5
GSM194385	lung_SqCC-6
GSM194386	lung_Met
GSM194387	lung_Dys
GSM85603	BE-1
GSM85604	BE-2
GSM85605	BE-3
GSM85606	BE-4A
GSM85607	BE-4B
GSM85608	BE-5
GSM85609	BE-6
GSM85610	BE-7
GSM85611	BE-8A
GSM85612	BE-8B
GSM85613	BE-9
GSM85614	BE-10
GSM85615	BE-11A
GSM85616	BE-11B
GSM85617	BE-12
GSM85618	BE-13
GSM85619	BE-14
GSM85620	BE-15
GSM85621	BE-16
GSM125355	never1 (lung)
GSM125356	never2 (lung)
GSM125357	never3 (lung)
GSM125358	never4 (lung)
