# Supplementary material for: Human Cancer Long Non-Coding RNA Transcriptomes
Source: PLoS One. 2011 Oct 3;6(10):e25915. doi: 10.1371/journal.pone.0025915 (PMC3185064; doi:10.1371/journal.pone.0025915)
Supplement: Table S6 — Tag-to-lncRNA matches. (XLSX) [file pone.0025915.s009.xlsx]

## Sheet: Tag-to-LncRNA matches
Supplementary Table 6- Tag-to-lncRNA matches
Tag-to-lncRNA matches
ENSG00000004142
GCTCCAAGGA
ENSG00000006534
ACCCTGGCCA
ENSG00000049319
AACCTGGGTG
GCTTCCTTTT
TAACAGAGTA
ENSG00000085365
AGTTGTTTTA
ENSG00000089336
TGCACAGTCA
TGTCATTCCT
ENSG00000100101
GCTCCCCAGT
GGGGGGCACT
ENSG00000100181
GGGGAGGGGA
TTCTGCTACT
ENSG00000104725
GGATCTCAGA
ENSG00000105132
AGAGAACCCT
TATTGTAGCT
ENSG00000108504
GAGGGTTCCA
ENSG00000108819
CCCCTGCCCT
ENSG00000117242
AGGAGCCAGA
CTACGCTGCC
GCGGCGAGGC
TAATTTCCCA
TCCTGCACAT
TGCCTGCAGA
ENSG00000121446
AAGGAAATGG
AGGATGAGGG
CAATACTTCA
ENSG00000124835
ATTTTGCAGC
ENSG00000125514
GCTCCCAGGG
ENSG00000126749
GGGGAATCAG
GGGGGGGTGG
GTGGCGTGCC
ENSG00000130600
AAAGAAATGG
AAAGGTGAGG
GCCACCCCCT
GGGCGAGACC
GTCCGGTGTG
ENSG00000131548
GGATGTACAC
ENSG00000131797
GGCTGGATGA
GTGCCCAACT
ENSG00000131951
CCCAGACTAA
ENSG00000132832
CAAGAAACTC
TTTCCTCTTC
ENSG00000135253
GCCAAGAGTG
ENSG00000137700
GGTCAGTCTG
ENSG00000142396
AAAGCAGGAT
TATCAGTTTT
TGGGCCTGTG
ENSG00000144596
CCACCGCCCT
GAGCTGGCAT
ENSG00000145063
AGAGGTGGAG
ENSG00000147676
CTTTTTCCCC
ENSG00000147753
GATGTCAGGA
ENSG00000151303
GAAGCTCTGC
ENSG00000152487
AGCATCTCTA
ENSG00000152931
AAGATAGTGG
TAGACAGAAA
TGATGTATAT
ENSG00000153363
AAACCAATCT
GATAAGAAGT
ENSG00000154035
CCCAGTGCAG
TACTCACACT
ENSG00000160695
TTATGGGATG
ENSG00000161103
GGTTTGATTT
ENSG00000162290
ACCAAATACA
GAGACTTGAA
TCAAGCATTT
ENSG00000163364
CTGTAACTGA
ENSG00000167117
GCAGCGCGTG
GGAAGCTGAG
ENSG00000167355
TTTTTTATCC
ENSG00000167912
GCTGAGTGAA
TTTTCCCGCT
ENSG00000170233
AATGTTAAAT
TAGCTTTCGA
ENSG00000170846
GGGGTCCCAA
GTTGCAGCTG
ENSG00000170858
GAGATCCTGG
ENSG00000170919
AAAAATCCAA
AAACTCTGCG
ACAAAACCCC
GTATAAGCTG
ENSG00000170983
AGGGGTCTGG
ENSG00000172965
GGGCTTTTTA
ENSG00000174365
AGCACTTTGG
GCCCAGGAAG
ENSG00000174403
GCCTGTCATC
GCTGGGTGCC
ENSG00000175061
AACTAATACT
AGGTTTTGAG
CCCAACAAGA
CTCAGCAGAT
ENSG00000175147
AGAAGCACAC
ENSG00000175611
AGACTTTTCC
ATATCTTTGA
CCCAGTTCCT
ENSG00000175699
AAGATTTACA
TTGGTAACAG
ENSG00000175701
GCCGGCTCTT
ENSG00000175873
GGGTAGCTGG
ENSG00000175967
CAGCCAGCCT
ENSG00000176320
GTAGCTGAAA
ENSG00000176395
GGGCCTGCTG
ENSG00000176700
CCACTGCATT
CCCGTCTCTA
GCTGCTTGTT
GGAGCAGAAA
GTGGTACGTG
ENSG00000176728
AATGGGATGA
GTGGTGTTCA
ENSG00000176754
AGAGGAAGGT
ENSG00000177112
GAGAGATCTG
TGCAGGTGCA
TGGTATAAAC
ENSG00000177133
CTCCAGCCAG
ENSG00000177338
TGAATGACTT
ENSG00000177406
GGTACGGGCC
ENSG00000177640
CAGAAAACAG
ENSG00000177738
AAGGATTCAG
ATCTTCAAAA
ENSG00000177853
TTCATCTTCT
TTGTTCAAGA
ENSG00000178248
GGCTGGGGAC
ENSG00000178947
AAGGAAAGCT
CAGATAGGAG
CGCTTTATTT
GCGGCGTCGG
ENSG00000179082
GTAGCTCACA
ENSG00000179136
CCACAATAAA
TGATTTTCAG
ENSG00000179406
GTGAACCTCA
ENSG00000179818
AGTGTGATGT
CAGTCTCCAT
TGACTTCCAC
TGCTATCACA
TGCTCTAGCT
ENSG00000179859
CTTTGTGGGT
ENSG00000180422
CTGTGGAAGG
ENSG00000180769
AACAAAAGAA
ATGTTAGAGT
GCACTGGCTG
GGAATTGAGT
ENSG00000181097
TCAGGAGGGG
ENSG00000181123
TAAATCTCTT
ENSG00000181652
CCACTGCCAC
ENSG00000182021
CCTTCCTCCA
ENSG00000182057
GGGGCTCAGA
ENSG00000182165
ATGCTGGGGA
ENSG00000182404
CCATTGTGCT
CTTTGTGCTG
ENSG00000183016
AAACACAGGA
CCCCGGCCTG
GCCCCACTCA
GGGAAGAAGA
ENSG00000183535
CCACACCTCC
ENSG00000183653
GTGTGTGAGT
ENSG00000183674
GCGAAAACCA
ENSG00000184441
CACGTGTATC
GCAAAAACTA
GCAATGCCAA
GGGTCAGGCC
ENSG00000184774
ATTATGCCAT
TGCCTGTGGT
ENSG00000185065
CCTTCCAAAA
ENSG00000185186
GCCCCTCCTG
ENSG00000185433
GAGGAAAGAT
TGCAGATCAG
ENSG00000185495
AAATATCTTT
TATATTCTCC
TATTTATCCT
ENSG00000185716
GACTCCAGAT
GGAAGATGCT
GGGAGAGAAA
TGGCCCTTTG
TGGGGCTGGC
TTGCATTTAT
TTGTTTAAAT
ENSG00000185728
AAGTAAAAAT
TATTACTGTT
ENSG00000185904
AGTGATCTGT
TGGGTCAAAC
ENSG00000186056
AAATCACTGG
ENSG00000186530
AAGCCAGGCC
CAGTCTCTCG
CTGTTGGAGA
ENSG00000186594
TAAAAGAACA
TGGCCTAAAA
TTATGTGATT
ENSG00000186615
TGCTGTCATA
TTGACTCCCA
ENSG00000187156
GAAACAATAG
ENSG00000187186
CCAGTGTCGG
CCGCTCCCCA
TCGGGAATGA
TGGCGGAGGG
ENSG00000187621
AAAATAGCCA
ACAAGCCACA
CCTTGAAATC
GAATGGAATG
GGAAGAGAGG
GGACAGGGGT
TCTTCTGCCT
ENSG00000188070
ATTTTTTTTG
GAATCCACTG
TTACTTAGTG
ENSG00000188185
CTTCTTGGCA
ENSG00000188206
AAGATATTCT
ATCTTCTAAT
GGAGGGAAAA
ENSG00000188477
GTGATGCACA
TAAAACATAC
ENSG00000188525
ACTTTCAGCA
ENSG00000188585
AGCCATTGGG
GCGGTGGGTG
TAGGAAAGGC
ENSG00000188660
AACCCTGGGG
ENSG00000189149
CGAATTGCTT
ENSG00000189223
ATGGCACCAT
CCTGGTCCCC
GGCAAAGAGG
GGGGTGCTCT
GTGTTCTGCA
TGCTATACTG
ENSG00000189238
TACACATCAT
ENSG00000189316
GAGTCGGCAG
ENSG00000196295
AATTCTGGGA
GCAGCAGGGA
GCTTGGGAGG
ENSG00000196421
AGTGAGACAG
ENSG00000196566
CACCACCAGG
ENSG00000196668
GCTGTCTCAA
TGCCTGCCTG
ENSG00000196696
GACGCGTCCC
TGGCTGTGTT
ENSG00000196756
AAATGTGAAA
CCTGGAATGA
GAGTTGGTGA
TGTGTGAGAG
ENSG00000196970
TTTGTCAAGA
ENSG00000197041
GGCTGCAATC
GTTCCTCCCC
ENSG00000197085
CCAAAGTGTT
CCTGCCCCCT
ENSG00000197462
AAGAAAACAA
ENSG00000197503
GGCAAAGTAA
ENSG00000197558
CCCTGCTGCA
GGCTCAAGAA
GGGGCCCCTG
ENSG00000197585
TGAATAATTC
ENSG00000197670
TGCAAAGGAA
ENSG00000197934
TCTGTTTACA
ENSG00000197989
CTAATGCAAA
GCAACCTCTG
ENSG00000198221
TTTTCTGAAC
ENSG00000198358
GGGAGAAACC
TCTCACCTCC
ENSG00000198468
CATATTCAGT
ENSG00000198491
CAATTCCAGG
GCTAGAAGGG
ENSG00000198496
GAAGAGCCCA
TGCCGGGAGG
ENSG00000198547
TTTCCAGGAC
ENSG00000198592
AGAGTTAAAA
GCCTCTTCCC
GTGGCACTGT
TGAAATATAG
TGAAGGGTGG
TGTTTTCCAT
ENSG00000203288
CAGAAAAATG
ENSG00000203321
GAGTGGAAAT
ENSG00000203347
GTAGTGAATA
ENSG00000203356
GATCAAGGAG
ENSG00000203362
TTACATCTTT
ENSG00000203472
GTCTCTGCTT
ENSG00000203499
ACCCCTGCCA
CCCCGGCTAT
TGCCTGGGAG
ENSG00000203585
AGGATGAGGC
ENSG00000203605
TTGCCCAGGG
ENSG00000203620
GACAGAAAGT
ENSG00000203645
TCTGCTTAAA
TTTCCTGCCC
ENSG00000203733
CTGCAGTTAT
GTTCCAGAAC
ENSG00000203739
GCAATCAATG
ENSG00000203801
GGTGGTGGTG
ENSG00000203875
GGGAGCATTA
TAATTTTGGA
TGCCTGAGCG
ENSG00000203886
AGCCTGAAGG
ENSG00000203897
AATTTTGTAT
ENSG00000203900
TAGGTTTCAT
ENSG00000203971
GGGAGGTGGA
ENSG00000203999
ATTTGTGAAG
TGGATGAGTT
TTTTTGAATT
ENSG00000204018
GGATTGGCTA
ENSG00000204025
TACTCATTGA
ENSG00000204054
CAAGGGGGGA
CACCTCCCAG
CGTGCACACA
GGGCAGCAGG
ENSG00000204117
ACAAACAGCT
ENSG00000204148
CAAACCTGAG
ENSG00000204241
CTCAGTCTGG
TCCGTGGTCG
ENSG00000204272
GAATCTACAT
GTGAACTTAC
ENSG00000204362
AAGTTCTTGC
AGCTCAGGGT
GATCAAGCCA
ENSG00000204380
GGCACCTCCA
ENSG00000204460
GGGAAGATTG
ENSG00000204466
CTGCCTTTTT
TGGATTCCCT
ENSG00000204517
TTAAACTTTG
ENSG00000204528
CCAGCCGCCA
ENSG00000204581
TGGGTGAGAG
TTCACAAGTA
ENSG00000204603
CCTGGCTGCC
TGGCTCCCAA
ENSG00000204666
AGAGATGGGG
ENSG00000204684
GGGTTTCTTT
ENSG00000204685
CCGCCTCCCG
GCAGCAGACG
GCCTGCAGGT
TGTGGAAATC
ENSG00000204754
TTTTTTAAAT
ENSG00000204792
ATGGCTGGGT
TCTCTGCTCC
ENSG00000204929
AGGATGAGGA
TAAGCCTTGA
ENSG00000204934
GCAGCAAGAG
ENSG00000204949
TCATTTACAA
ENSG00000204971
ATTTGTGGCC
ENSG00000204990
ACCCTTAGCC
GTCTCTGTCA
ENSG00000205054
AATGGAAACC
GAGTAATGCT
ENSG00000205351
CAAATCACCC
GTATGAGGTG
ENSG00000205424
GGGAAAGCTG
ENSG00000205488
AGGGCTTCCC
ATAAAAGCAG
TGGCTGACAC
ENSG00000205611
ATAAAAACTA
ENSG00000205622
AGCAAAGGCA
GCATATACAT
TGTGAGAAAG
ENSG00000205628
TTTTTATTGT
ENSG00000205632
TCTGTGTCTG
ENSG00000205682
GAGAAGGCGC
GGCGATGCCT
ENSG00000205822
CTGGAGTACA
ENSG00000205837
ACTTAATCAC
TGTGGAGAAA
ENSG00000205885
ACGGTGCCAC
GTAAGAAGTG
ENSG00000206028
GTGCTGTGGC
ENSG00000206029
AATAAAGTAA
GTGGTGCGAG
ENSG00000206113
CCCCACCCCC
ENSG00000206417
GGAAATGATG
GGAAGCCCCA
GGGGCTCCTG
ENSG00000206552
AATCCCCATC
GAGAAAGACC
GAGGTGTCCT
ENSG00000206567
ATTTGCCAAT
ENSG00000206573
ATCAAATTTG
ATGTGTGATG
ENSG00000211683
AATAACTTTA
ENSG00000212766
CAAAACACTG
ENSG00000212978
TCATTGATGG
TTTCTTTGCC
ENSG00000213279
AAATTTTTTT
TCCCAGGTGA
TCTTTTAAAA
ENSG00000213373
AAGGAAAGAT
ENSG00000213468
CAAGGATATT
ENSG00000213742
ATCTCACCTC
CTGCATCTTT
ENSG00000213963
GTAAAAAAAC
GTTCCCCAGC
TCATTGTACA
TCATTTTAGA
ENSG00000213981
GCAGCATAAA
GCTGGGTGCG
ENSG00000213994
AAGACGACAG
ENSG00000214000
CCAACAAAGG
ENSG00000214039
ACCTCGGCTC
AGTAAATAGT
GATGGCTTCC
GGACCCGGGG
ENSG00000214049
AAATGGACAA
CACCTTGTGA
CTTCCAAGCA
ENSG00000214293
CATAGAGATG
TGATAAAAAT
ENSG00000214381
CCCAGCCTAT
GGCATAATAG
ENSG00000214432
GCGAAGCCCC
ENSG00000214548
CCGAGGACCA
CTACTGAATC
CTGAGCTGCT
GGAAAATACA
GGGATGGTCA
GTTCATCCGC
TCAGACTATT
TCCGTCGTTT
TGATTTTTAT
TGGGAAGTGG
ENSG00000214654
CCTTGCTTTT
ENSG00000214719
AGCACTGAGC
ENSG00000214733
GGGCGCCGGC
ENSG00000214738
TCTGGGCTGT
ENSG00000214796
AGGAGTTCTA
TGTCCTGGGC
ENSG00000214870
ATGTGCCCAG
ENSG00000214888
CAGTGAGTTT
GCAGGGCAGG
ENSG00000214934
TTGGAGTGTG
ENSG00000215039
AGCCTCAGTA
CAGCACAGAC
TTTAATGATA
ENSG00000215068
CAACCAATTC
ENSG00000215113
CAGTTCCTCA
ENSG00000215154
AGACAACTGG
TGTTTGGATA
ENSG00000215190
ATAAAATCCT
CACTAAAAAA
TCCCCCTCAA
ENSG00000215196
TAAATTTCAA
ENSG00000215231
CTGCTGAATG
ENSG00000215246
GGATGTATTT
ENSG00000215248
TATATATGTA
TGACACCACA
TGTGAGCCAC
ENSG00000215386
GCCCCAGACT
ENSG00000215417
AATTTTAAGA
ENSG00000215424
AACTTGACTT
ATTAAATTAA
ENSG00000215447
ATGGACAAAC
GACACCAAGT
GCACTGCAGC
ENSG00000215458
TGAATTACCT
TGCGGAAATA
ENSG00000215483
ATCTCGGCTA
ENSG00000215560
AAAAAGACTT
TGGTTAGTGT
ENSG00000215808
TTTTATAGCT
ENSG00000215866
CCCGGCTCCC
TATGCATCCA
ENSG00000215869
TGAGGGGGCC
ENSG00000215889
GCCTGGAAAA
ENSG00000215908
CCACTCACCC
TCTGCCCTGG
ENSG00000216863
GGGAAACTTC
ENSG00000217576
CTTCACATCT
TAGTGTATGC
ENSG00000218018
GAGATGCCCA
ENSG00000218109
GAGGGAGTCT
GCCCCCTTAC
ENSG00000219445
CCCTGGATGT
ENSG00000219481
ACAGATTTTC
ATATCAGGAC
GTGTGGGCTG
ENSG00000221817
GCATTCCCAG
ENSG00000222035
CCTGTATCCC
ENSG00000222041
ATTGGATGAT
GATCACTGCT
GGCTGGTCTG
ENSG00000223357
AAATAAACTG
GCCCCCTCAC
TCACAGAATG
ENSG00000223358
GCAACCTCCA
ENSG00000223382
GTTCAATCTT
ENSG00000223385
AGGGATATTA
CAGTTTAAAG
ENSG00000223387
AGGAAATATA
ENSG00000223392
TCTGTTTAAA
ENSG00000223396
AGAAAAGCTG
GAAAGAAAAG
GGTTGGTAGG
ENSG00000223403
CTCTTCTCCC
ENSG00000223414
TGTTTTAACA
ENSG00000223440
TTGTGTCTTT
ENSG00000223478
TTTGTGATCT
ENSG00000223479
TCACCAGATG
ENSG00000223482
AGATGGACAT
TGATCTCCAC
ENSG00000223486
TGTACTGTAA
ENSG00000223492
ATGGCTGGAA
ENSG00000223522
TAGATATCAT
ENSG00000223546
TATTTGCAAC
TGACTGAACT
ENSG00000223561
GTTTGTGTCA
ENSG00000223563
GCCTTTCTCA
TGCCAATGTT
ENSG00000223573
TTTGAAAACA
ENSG00000223586
TATGAACTTC
ENSG00000223587
AAAAAACCTT
ENSG00000223597
AGTTTGGCTT
ENSG00000223617
TGTGATTACA
ENSG00000223627
TAAGATTTTA
ENSG00000223631
TGTCTTTGGG
ENSG00000223634
AGTAAACAGA
ENSG00000223646
CTGAAAACTT
ENSG00000223675
CCTGAAGTCC
GCGAAACCCA
GCTTTGAAGA
ENSG00000223692
AACACATACA
ENSG00000223701
AAAACTATAA
ENSG00000223704
CATCATTAAT
GAGGATTTTT
ENSG00000223715
TTCCTGCTTT
ENSG00000223725
TAAGATCAAT
ENSG00000223742
TAATTTTTAG
ENSG00000223745
GACTAAATTG
TACAATGACA
TTACTCAGGC
ENSG00000223760
GCTCTGCCAA
ENSG00000223768
CATTAAATAC
TAGTGAGTTG
ENSG00000223774
GCAGAATAGG
ENSG00000223797
GCAAGAAAAT
ENSG00000223799
CCACTACGCC
CTGGAATGAC
ENSG00000223806
CTTGAGAGTC
ENSG00000223812
TGAGGATACA
ENSG00000223829
ACTGTGAGAC
TGAGGTTAGC
ENSG00000223839
GGCCTGGAGC
TGATCTGGTT
ENSG00000223842
GGAAACAAAA
ENSG00000223843
CCTCTGATGC
ENSG00000223855
CTTCTTTCTG
TGCCTAAGGT
ENSG00000223859
ACTCTTTCAA
ENSG00000223871
CTGAAGTGCA
GAAGTTGATT
ENSG00000223872
GCTACTGTGA
ENSG00000223891
CGCCTGTGTG
ENSG00000223907
AAAGTACTTA
AGAAGTGCTT
ENSG00000223910
TATGACAACA
TCCTGCTTGG
ENSG00000223930
TGTGCACCTT
ENSG00000223941
AAAGAGAGAG
ENSG00000223959
AAGGTGCTAT
ENSG00000223975
AAGGACATCA
ENSG00000223989
GCAACAGGAG
ENSG00000223991
CCACTGCCTT
CGTGGGCCAG
ENSG00000223999
GTCACTGGCT
ENSG00000224008
AGCAAAATGA
GAATGATTCT
ENSG00000224020
GAGTAGATAA
ENSG00000224028
TGTTATTTCT
ENSG00000224032
TTAGAGATAG
ENSG00000224034
TTATTTTAAT
ENSG00000224037
CGAGGGAGGG
ENSG00000224046
TTTGACTAAT
ENSG00000224057
ACAGAGAGGC
GCAAACTCTT
GTGGCCAGAA
ENSG00000224074
TATTTATGCA
TCACATAGCA
ENSG00000224077
AAAAATACTA
ENSG00000224078
TGGTCAGGCT
ENSG00000224081
GGTTTCTGCC
ENSG00000224086
GCTAGCAAAG
TGAGTGCGTG
ENSG00000224116
CATCAGGAAA
CCACCCGTCT
GTGGCATTCA
TTCTTTGCCC
ENSG00000224119
GAGCCAGCTG
ENSG00000224127
AAATAGCATC
ENSG00000224137
CTTTATTTGA
ENSG00000224152
AACCAAGTGA
ENSG00000224165
GGTGGGGAAG
ENSG00000224167
AGAGACTCTG
ENSG00000224189
ACAGCATTTC
ENSG00000224191
TCTCTACACA
ENSG00000224204
CCCCCCTCCG
TTGATGGGGG
ENSG00000224223
AATTGCAATA
ENSG00000224231
TGGAGCAGAG
ENSG00000224247
ACTGGAAGGA
ENSG00000224259
GTACTGGAGG
GTAGACATCA
ENSG00000224272
ATTTAGCAGA
ENSG00000224281
AAAGACAAAG
TCCTCAAAAA
ENSG00000224286
GGAAAGCAGA
TTTTTTGTGT
ENSG00000224301
AACCAAATGT
ENSG00000224307
TGAAAGCATC
ENSG00000224310
TTGAAACCCC
ENSG00000224358
TGTCCATTTT
ENSG00000224376
CAGGCCTCCT
CCTGCCATCC
GGCCGAGAAC
ENSG00000224381
TCCTTTCTCT
ENSG00000224382
TAACTCACAT
ENSG00000224397
GTCTGCCTGC
ENSG00000224400
AAGGCAGGGA
GGAACAACCA
ENSG00000224405
GGGATAAATT
ENSG00000224407
GGCCGCACAA
TAAACATAGC
ENSG00000224413
AAAAAAGCTG
CGGAGCGGAG
ENSG00000224424
TTGTTTAGCC
ENSG00000224428
TACAGAAGCG
ENSG00000224440
AAAATAAAAT
ENSG00000224459
TGCAGACACA
ENSG00000224467
GGAGAAAGAA
ENSG00000224490
TTTTAAATAA
ENSG00000224509
TTTCCTTAGG
ENSG00000224511
AGTAACCTTT
GTCTGACACA
TAACTCTTGA
ENSG00000224514
GTGTCTTTTC
ENSG00000224531
CAGACCCATT
CGTCGAGCAG
TAAGCCATAT
TCTTATTTTA
TGCTACCTGT
ENSG00000224533
TAAATTATCT
ENSG00000224559
AGATGGGTCT
AGATGTTTTG
GTGGCTTTTA
ENSG00000224568
AGTCTCCAGT
ENSG00000224596
GTCCCAGCAC
ENSG00000224597
CAGTACTTTT
CCTCAACATC
CGCGGCAGCT
GTTGATACAA
TTTTGGAAAT
ENSG00000224609
TACCAGGGTA
ENSG00000224645
AAGTCTCCCT
ENSG00000224660
AAGCTCTCAA
CCTGCCTACT
GGGGCCCTGA
TATAAATGTT
TCAGTGATGC
ENSG00000224665
CCTCTGTGCA
ENSG00000224687
TTGCTATTTT
ENSG00000224699
ACAAAAATTC
GAGAGCAGAG
ENSG00000224715
AAGCCCAGCC
GAATACAGTT
GGGCAGAAGG
ENSG00000224729
GCTCAAGGGA
ENSG00000224750
ATTAAATAAG
TTTGTCAGTG
ENSG00000224761
AGAAGACGTT
ENSG00000224790
GTAACAAGAC
ENSG00000224794
GTGGAACCCA
ENSG00000224810
CCAGTCAGAA
ENSG00000224812
AAGCAAGGGG
CTGTTCTCTG
GAGTAGAGAA
ENSG00000224818
TCTGACCTTC
ENSG00000224819
AAAATCCTGA
ENSG00000224822
CACAGGTATG
TGCATACCTA
ENSG00000224832
AATAATACTT
GAAAATCAGG
ENSG00000224843
GAGAGATATT
TTAAGAAGTT
ENSG00000224848
GCCAGAAGCA
ENSG00000224851
GCCCTGAAAG
ENSG00000224855
GAATTGAGAA
ENSG00000224863
GACCTCAAAG
ENSG00000224870
CAGTGATGGA
ENSG00000224888
GGTGGCAGGT
ENSG00000224897
AACAGATACT
AATGAACTCC
AGCTAAAATA
GAATATGTGG
GACACATAGA
GTGGAGGGGA
TGGCCAAAAA
TTCTCATAAG
ENSG00000224903
AGGAAACAGA
ENSG00000224911
TCCATTCATT
ENSG00000224924
AATATCAAGC
ENSG00000224930
AGTGAAAACA
ENSG00000224939
GCTCTCCTTT
ENSG00000224945
GCTTTGAGTC
TGATCTTGGT
ENSG00000224959
AATCCTTGTG
ENSG00000224973
AATTTGGCTT
ENSG00000224984
TTTATTTGTA
ENSG00000224995
TATTTTTCTC
ENSG00000225006
AATTTTTTCA
TAAGAAAACT
ENSG00000225032
GATGTGCGGG
GGCTGTCTCC
ENSG00000225037
AGGCTAGGGA
ENSG00000225057
GCAAAAGGGA
ENSG00000225064
CTGGCACCCC
ENSG00000225074
AGCTTCTCCC
CTTATTTTGT
GAGTGCAGGG
ENSG00000225083
TACATAAATT
ENSG00000225112
AATTTTTGTT
ENSG00000225119
AGCCAGCGCA
GTTCATTATA
ENSG00000225135
CTTGGTATAG
ENSG00000225151
CCAAGAGGAC
CCACCACCAA
TGCAGCATCT
TGCTCTGAAT
ENSG00000225156
AACACAAGAA
AGACAGGCTA
ENSG00000225166
AGTAAATAAA
ENSG00000225172
AATGCTTTTT
ENSG00000225177
TACTGAACTG
ENSG00000225179
GTGAGGCTGA
TCCTTATTAA
ENSG00000225187
TCTCAGGGTC
ENSG00000225194
TTTCTCCTTT
ENSG00000225205
TGCTGCATAG
ENSG00000225209
TTGAAAGAAT
ENSG00000225210
ATTTTGCAGG
CACCCGTAGT
GCAAAACACG
TGATGGTGGA
TTTAGAGAGA
ENSG00000225213
AAAGCCACAA
ENSG00000225226
AAAAAAATGG
ENSG00000225241
AAATAAACTA
GAATGAATGT
ENSG00000225255
TTTATAGTGA
ENSG00000225263
ACTGGTACAA
ENSG00000225265
AGCTGTTCTC
ENSG00000225278
AAACTGAAGA
ENSG00000225303
GGCCAAGTCT
ENSG00000225329
ATCTTGGGCA
ENSG00000225339
CAGTACCAAG
TGACTGCTAG
ENSG00000225376
ATTTTTTTTT
ENSG00000225378
TGACCAACAA
ENSG00000225407
ACCCTTTGCT
ENSG00000225411
GTTGGCAGTG
ENSG00000225437
AAAAATGCTC
GGACTCACAG
ENSG00000225439
GCAAGCTCAC
TGGGATGGGG
ENSG00000225442
GTGATGCACG
ENSG00000225465
AGGGCGTTTT
ATTCCAGGCC
CATTCCATTG
GTTCTGACAG
TGAGGAACAG
ENSG00000225470
AACAAACTGA
TAATGTGAGG
ENSG00000225472
CTAAGTAAGA
TGGAAAATAA
ENSG00000225484
TAAAAATGAT
ENSG00000225489
ACCAGCCTGG
ENSG00000225497
CAAGAGGCAC
ENSG00000225511
ATGCCTCTTG
CTTTATTTGT
ENSG00000225527
AGACTTTTAT
ENSG00000225541
CTGACCAAAG
ENSG00000225548
CCCTGGATTC
ENSG00000225554
TGAAAGATGA
ENSG00000225564
TGTGTTAGAG
ENSG00000225572
ACACTGTACT
ENSG00000225579
AATTACAACA
ENSG00000225611
AAATTTAAAG
ENSG00000225613
TCCTACTTGG
ENSG00000225619
CAATAAAATA
CATAGAAAAA
ENSG00000225632
CCACTGCAAC
ENSG00000225666
GTGGAACACA
ENSG00000225667
AGACACCCAG
ENSG00000225670
CACCCAATAC
GAACAACATC
TTGTCTGCAG
ENSG00000225684
AACAAACAAA
ENSG00000225708
ATGCTGAATG
ENSG00000225730
AAAGAAATAA
ENSG00000225731
GGCCCCTCAA
ENSG00000225733
AAAAATTACA
AGGCTGCGAC
CAAGGTTATT
CCAGAGATCA
GAAACAATGC
GTGCAGAAAA
GTTGTAAAAT
TAATGAAAAG
ENSG00000225744
CTCCCAGCTG
ENSG00000225746
TCTTTAATTC
ENSG00000225756
GGACAGTTCT
GGCCAGGGAA
ENSG00000225759
TTCTTGTGGC
ENSG00000225767
CAAGACTAAC
ENSG00000225771
CCACTGTGCC
ENSG00000225778
CTATTGCAAT
ENSG00000225783
AATGTAGCTG
AGCAGGCTCT
ATCCCATCTG
CTTCTTCCCA
GAGAATCAGA
GATTCAACAA
GTGCTTTTAT
TCATTACCCC
ENSG00000225792
TGAACTGCTG
ENSG00000225811
TCTCTCTGGA
ENSG00000225828
CGCCGAGCAC
GATGCCAACT
GCCAGAGGCC
ENSG00000225855
AAACTGACTT
GGCACCCTCT
ENSG00000225860
AGTGAGCTGT
CTGGGGAGAG
ENSG00000225874
GTGGGGCCGG
ENSG00000225877
ATTCCACTTA
GACTTCTAGC
ENSG00000225879
GGAGGAAATA
ENSG00000225880
TGTTCATAAC
ENSG00000225882
GAAAGGATCT
TAACAATAAA
ENSG00000225884
GAACACCACT
ENSG00000225914
CCTATGTCCT
ENSG00000225929
TCCTACCCTC
ENSG00000225937
GGTGGAGGGG
ENSG00000225951
AACTCAGAAG
ENSG00000225964
CCAGACTAAT
ENSG00000225973
GAGATGAACT
GATAATGATT
ENSG00000225975
AATATGATCA
GATATGTGGT
ENSG00000225982
GTTTCCTGCT
ENSG00000226017
AGCCACTGCC
CTCCCATCCA
ENSG00000226025
GCAGGCCCTG
GCCAGCTAAT
TTTTTTTTGT
ENSG00000226026
GCACGAGAAC
ENSG00000226029
ATTTTCTGCC
CTTGGAATCC
ENSG00000226044
TTTGCAGTGG
ENSG00000226053
TGAGATGTGC
ENSG00000226089
CTAAAAAGTG
ENSG00000226091
GCGGAACTGT
ENSG00000226097
CAATTTAAAA
GCAGATACAA
TGGGTTACAG
ENSG00000226101
ACTAGAAGAG
ENSG00000226113
GCCAAAAAGT
ENSG00000226124
TATCTTTTAA
ENSG00000226143
TGAATGAAAG
ENSG00000226149
GTGTATTTTG
ENSG00000226155
AGCTGTTTTG
ENSG00000226159
ACTTTTAAAA
ENSG00000226167
CCACTGCCAT
ENSG00000226179
GGCAATATGG
ENSG00000226194
TGCGTGAAAG
ENSG00000226197
CATCATAAAT
ENSG00000226203
CCTGGCCAAT
ENSG00000226206
ATAATTTCTT
ENSG00000226239
CTGGCCTCCA
ENSG00000226240
GTGTTCCCTT
ENSG00000226250
GTTCTGTGGC
ENSG00000226252
CAGAGTCCAT
CTGGCCTCGG
ENSG00000226272
CATCAAGAAG
ENSG00000226277
TTGTTTTAAT
ENSG00000226328
TTGGACAAGA
ENSG00000226367
ACTAACTTTG
ENSG00000226380
CAAGGAGTTC
GAGACTTATT
GCTTGTGGGC
ENSG00000226386
CGGGCTTGAG
ENSG00000226387
TCACCATCTC
TTTTTTCTCT
ENSG00000226403
TTAAGCAGTT
ENSG00000226416
CAAACTGGTC
TGCCCGGCGG
ENSG00000226431
CTGGCCCTGA
ENSG00000226433
TTGTGAGGAA
ENSG00000226453
AAAGACAGAG
ENSG00000226458
ACTTTATTTA
ENSG00000226472
CTTCCTGTTA
ENSG00000226476
GGCTTCCGTG
ENSG00000226482
GCAAAATAAA
TTGGGGATAG
TTTGACTATT
ENSG00000226484
CTAAATAAAA
ENSG00000226496
GGACCCTGAA
ENSG00000226508
CTTGGTGATG
ENSG00000226566
CCAACAAATC
ENSG00000226571
GAAAAACTGT
ENSG00000226585
ACACAAAAGC
GTGGGGTTGG
ENSG00000226604
AAACCACCAC
TTCCCTCTCA
ENSG00000226629
CTGTCTAAAA
ENSG00000226659
CAGAATACTG
ENSG00000226673
GGGCTGAATG
ENSG00000226688
AGCCCCTCCA
GCTGCTGTCA
ENSG00000226702
AAAATCTGTA
ENSG00000226711
ATCCCAAAGT
CTTTCATCTG
ENSG00000226722
AAGTCAGCCA
GGCAGGGACA
ENSG00000226741
CACACATACT
ENSG00000226746
GGGAGATCCT
ENSG00000226752
AAGAAGAGGA
CCTCTGGAAG
GGGATTTTTA
TGGGAATTCC
ENSG00000226754
GGAATGAATG
ENSG00000226758
TGCCACTACA
ENSG00000226780
TGTCCCTCTT
ENSG00000226803
CACAGAGCAA
ENSG00000226808
CCTTGCCCTA
ENSG00000226816
GGGAATGCTG
ENSG00000226828
AGCCACAAAA
CAAGAGAAGA
ENSG00000226833
GGCCTCCTCC
ENSG00000226851
GACCAAATTG
ENSG00000226852
TAAAAAAGGA
ENSG00000226856
GGTAATCAAT
ENSG00000226869
GGAAGGCAAG
TCCTTCCTGC
ENSG00000226887
CATATATAAT
GGAAATGGAG
TCTTGGATAT
ENSG00000226899
ATTGCAGCAC
ENSG00000226913
GACTTTGGAC
GCAGCCATTT
ENSG00000226917
TGACTGCTGC
ENSG00000226921
GCTGGAGCCA
ENSG00000226924
CCTGAGAGCT
GCAACACCCT
ENSG00000226944
TTACTGACCT
ENSG00000226950
TAGGGGCTCA
ENSG00000226953
AAGACTCAGG
ENSG00000226963
GAAAGTGGCT
ENSG00000226985
AGATGGTGTG
CAACTCAACA
ENSG00000226995
GAAGTTCCTT
GGGGATGCGG
TTCCCAACCT
ENSG00000227003
GACCATTTGT
GGCCTTCTGT
ENSG00000227036
GTTCATCCTT
ENSG00000227039
ACACAAGGCA
CCACTCTTCT
GTTTCTGCCC
ENSG00000227053
CTGTGATGCA
ENSG00000227061
CAAAAACACA
GGAAATACAG
ENSG00000227066
AGTCTGCCAA
CATTGCAGAG
ENSG00000227082
ACAGAGTGAG
TAACTAATTC
ENSG00000227083
CCCAGCCTTA
ENSG00000227090
CACTGCCTTG
ENSG00000227098
TGCTGTAGTC
ENSG00000227107
TCACTGGACT
ENSG00000227110
CTGTGGTGTG
ENSG00000227117
ACCCGTCCAC
ENSG00000227131
AACTAAATAC
ENSG00000227135
GAGGGAAGAA
ENSG00000227136
CAGCGAGCCA
TAGAAACTTC
ENSG00000227139
TTATTAAATG
ENSG00000227143
ATACTTTAGT
TTTTATTTCC
ENSG00000227145
ATTCTCCTGT
TTGCCAGGAC
ENSG00000227165
ATGCTATGCT
GAGAACTGTT
ENSG00000227189
ACTTGGGCAG
ENSG00000227199
TTTCAGCGCT
ENSG00000227215
AAGCCTGGCA
ENSG00000227217
AATAGGCCAA
ENSG00000227218
TGGTCAGTTT
ENSG00000227230
GATTTCTGAA
ENSG00000227260
TTCGCCAGGA
ENSG00000227269
CAATACTGCA
ENSG00000227278
AAGTTCTAGT
GTACAGCTCT
ENSG00000227279
TTATGATTAA
ENSG00000227301
GTGGGGCCGC
ENSG00000227355
ACTGGCTTCC
ENSG00000227386
GTAGGAATTT
ENSG00000227388
TTCCTCAAAG
ENSG00000227403
TAAAATGTAG
ENSG00000227415
AAAATATCTT
CCTATAAAAA
ENSG00000227467
CATAAAATTA
ENSG00000227477
GTTGGAAAAT
ENSG00000227480
TGTGAAAACT
ENSG00000227486
TTTACTAATG
ENSG00000227498
GAAGGCAATG
TCTGTAAATG
ENSG00000227533
CAAATTTATT
TGAGAGTGTG
TTTTAATTGG
ENSG00000227540
ATTTGTACAT
ENSG00000227543
GTAAACCAGC
ENSG00000227544
GATATGCTCT
TGAATCTACA
ENSG00000227555
AACACGGTGC
ENSG00000227562
TGACAGAGAG
ENSG00000227579
GAAGACAAAG
ENSG00000227599
GGCAGATGAA
ENSG00000227606
GCAGCCCTAG
ENSG00000227608
TTGAATAGTG
ENSG00000227612
GGAAACCAGC
ENSG00000227619
TCCCTTCTCC
ENSG00000227646
GCAGAGAGCT
ENSG00000227681
CTGATTTAAA
ENSG00000227695
GTGAAACACC
ENSG00000227704
GCGCAAGGCA
ENSG00000227712
TCCTAATCTC
ENSG00000227718
ATCTCAAGAT
ATTTTGGGGG
GCAGAAAGAG
ENSG00000227729
CTATGTTTTC
ENSG00000227733
GTAAATGATT
ENSG00000227734
TAAAAATTAA
ENSG00000227740
ACGGTGGTTA
ENSG00000227744
GCTTGGAGTG
ENSG00000227764
GAGGAGGCCC
ENSG00000227811
ACGACAGTGG
ENSG00000227818
GAGCAGAACC
ENSG00000227824
ACTTGAGGAC
ENSG00000227857
GGTGTATACG
ENSG00000227863
TCAGGAAGCT
ENSG00000227869
AAAGCTGAGA
ENSG00000227885
AACTCTGCAG
ENSG00000227893
CTGGGATAAT
ENSG00000227912
CTGCTGCTGT
ENSG00000227920
ACCTTGGGCA
CAGTGTGTGA
ENSG00000227925
TTACAGTCCT
ENSG00000227953
AACCTGAAAG
ENSG00000227954
CGGAGTCCAA
ENSG00000227955
GTCACTCATA
ENSG00000227964
CAACTTCCAA
ENSG00000227987
AGAAAGTTTC
ENSG00000228010
CCCGACTAAT
ENSG00000228011
GCCAGAACCT
ENSG00000228013
AAAAAATTTA
GCAGCAGGCA
GTAAAACCAC
GTGGTGCGTA
ENSG00000228016
AACTTCTTGG
ENSG00000228035
AAGAAAAAGT
CCTGCACAGT
ENSG00000228037
TTCCAGAGAG
ENSG00000228043
CACATTTTCA
ENSG00000228067
ACTTTTTAAA
TAAATTATAC
ENSG00000228105
CAAAGCAGCA
ENSG00000228106
ACTACACAAG
ENSG00000228108
CCAGGCTTTG
ENSG00000228126
CCTGGAATCC
ENSG00000228141
ACCTTGGCCC
ACTGGGTTCT
ENSG00000228150
TTGGCAAGGC
ENSG00000228151
GGTCAAAGAA
TATGCTTTGA
ENSG00000228172
TGGGTTTGAA
ENSG00000228183
AGATTGGAGA
ENSG00000228189
CTTCCCTGTG
ENSG00000228251
CAACTAAAAG
ENSG00000228262
GATTCCAAGG
GTATGGGATC
TAACTAATCT
ENSG00000228271
AAGTCACTGG
ENSG00000228275
GAGACTCACC
ENSG00000228280
TTTAAACTGA
ENSG00000228294
AACTAAAAGA
ENSG00000228302
TTACTTTTAT
ENSG00000228340
CAACTAACTC
GTGCTTTCCA
TGCAGATGAG
ENSG00000228352
AAAAAAAAGC
CAAAAGCAAA
ENSG00000228353
GTCACGACTG
ENSG00000228363
GACCTGGAAA
ENSG00000228372
CCTGGCTTCC
ENSG00000228383
CGGAAGTCCT
ENSG00000228393
AAGCTTAAAA
TTTTCAAAGT
ENSG00000228395
CAAAAAAAAT
ENSG00000228412
TTCTTCGCTT
ENSG00000228414
AACCACCGTG
ENSG00000228430
TGCCTTACAG
ENSG00000228437
CCTGAACAGA
ENSG00000228449
CTTCTCAGTA
TGGACGGGGT
ENSG00000228484
ATCCCACCAA
TTGTTTCCCT
ENSG00000228486
AATGCTCTGT
ATGGTTTATG
CCCGGCCCAG
GTGGCACAAT
ENSG00000228487
GACCCTGGCC
ENSG00000228495
AGCAAGAAGA
CCTGGGTAAT
ENSG00000228504
CAGGAAGCTT
ENSG00000228505
CTCCGTTTTG
ENSG00000228538
TCAGTTTCCC
ENSG00000228592
CAAAGGCTGC
ENSG00000228609
ACAGAGCAAG
AGCCTCCGTG
TTACATTTGG
ENSG00000228613
GTGAGATTTA
ENSG00000228618
TCTTCTTGCT
ENSG00000228622
ATCAAGGATG
ENSG00000228623
AATGAAAAAT
ENSG00000228624
AAATTTTAAC
CAGTTACTTT
ENSG00000228630
TAGACACAGA
ENSG00000228639
TTTTGGAATA
ENSG00000228651
AGTGTCTGTA
ENSG00000228671
GGGTTGGCTG
TTGTAACATT
ENSG00000228673
GTGCCATTGC
ENSG00000228678
TCCTTAGAAC
ENSG00000228680
AGCTGAGATT
ENSG00000228682
ATATGAGCTG
ENSG00000228697
TTTACTCACA
ENSG00000228709
CCGGCGGAAG
ENSG00000228723
GCAAAGAGTG
GCCTGGAAAG
ENSG00000228734
TCTGTAGCCC
ENSG00000228735
TAGTGGTAAC
TGGGTTTTCC
ENSG00000228740
GAGTATGAAT
ENSG00000228741
CTAAGCACAG
ENSG00000228742
GAAGGGAGGC
ENSG00000228747
TGAAAAGATG
ENSG00000228775
AATACAAGCC
GGTGGCACTG
TGTACCTTAA
ENSG00000228784
CTGCTTCATC
TACCTGTAAT
ENSG00000228794
TGTGTAATCC
ENSG00000228800
AAAGATATCA
ENSG00000228801
TCTTTCTTTT
ENSG00000228824
AGCTGTATTT
ENSG00000228830
ACTGCCCCCT
ENSG00000228839
CAAAATCTAA
CAATGCTGTC
ENSG00000228842
AAATTGTTTT
TTACCCTCCT
ENSG00000228858
TTCTCATTAT
ENSG00000228862
AGGGAAGGTG
AGGTTGAGGC
ENSG00000228877
TGGGCAGGCT
ENSG00000228918
CCTGTAATAC
ENSG00000228925
ATTATGGCTC
ENSG00000228971
CTGAATGGTA
ENSG00000228980
TCTATACCTA
ENSG00000229012
GCTTCTGTTC
ENSG00000229017
ACTTAATGGT
CAGGAAAAAC
CTCTGGGTTG
ENSG00000229042
CCTTTCATCC
ENSG00000229056
CTAAGAACTT
TGTTCGGAGA
ENSG00000229081
TAAGAGAAGA
ENSG00000229111
GATACTGTGG
ENSG00000229118
AAGGTTCTCC
ENSG00000229124
TATTCACTAT
ENSG00000229127
TAGAACTGTA
ENSG00000229140
AGGAAAGGCT
ENSG00000229152
GTATTTATGA
TAATACACTA
ENSG00000229153
CAATTTTAAA
CTCTACTCTT
TTTTAATTAA
ENSG00000229160
GTGGCTGTTT
ENSG00000229167
AGCAAAAGCC
ENSG00000229175
CTTCCTCTTG
GCATTAGAGA
ENSG00000229180
GTAACTTGAA
ENSG00000229191
ATGGGGAAAC
TTCTCACTCT
ENSG00000229205
GAAAACCTTC
ENSG00000229228
CAGAAATAAA
ENSG00000229236
TCAGCAGTAA
ENSG00000229242
GAGGGAATTT
ENSG00000229243
CTTGGGTGCT
ENSG00000229261
AAAAATACAC
ENSG00000229269
GTGGTGCAGG
ENSG00000229276
TCTTTTCATA
ENSG00000229299
TGAGTGCTTC
ENSG00000229312
TTCTCAAAGG
ENSG00000229334
AACTGCTTTC
ENSG00000229335
TAAAAACCCA
ENSG00000229348
TATGTTAATT
ENSG00000229385
ATGGCAAGTG
ENSG00000229395
ACAAAGATGT
ENSG00000229400
CCGCAGCCAG
ENSG00000229418
TTTCAGGGTC
ENSG00000229425
TTTTTCTTTC
ENSG00000229463
AACTGATTTT
[truncated: 4,563 more rows]
