# Supplementary material for: Human Cancer Long Non-Coding RNA Transcriptomes
Source: PLoS One. 2011 Oct 3;6(10):e25915. doi: 10.1371/journal.pone.0025915 (PMC3185064; doi:10.1371/journal.pone.0025915)
Supplement: Table S7 — Normal tissue lncRNA expression matrix. (XLSX) [file pone.0025915.s010.xlsx]

## Sheet: Normal LncRNA Matrix
Supplementary Table 7 - Normal tissue LncRNA expression matrix
Ensembl Gene ID	Associated Gene Name	Description	Chr	Start (bp)	End (bp)	Brain	Breast	ESC	Esophagus	Gall Bladder	Heart	Liver	Lung	Lymph Node	Muscle	Peritoneum	Placenta	Prostate	Retina	Spinal Cord	Stomach	Thyroid	Vascular	WBC
ENSG00000245532	NEAT1	nuclear paraspeckle assembly transcript 1 (non-protein coding) [Source:HGNC Symbol;Acc:30815]	11	65190245	65213011	223.371	337.248	19.6718	991.618	875.085	72.2343	392.11	1446.45	160.924	250.445	765.969	1911.94	248.264	336.978	1387.24	736.166	991.909	119.126	234.242
ENSG00000251562	MALAT1	metastasis associated lung adenocarcinoma transcript 1 (non-protein coding) [Source:HGNC Symbol;Acc:29665]	11	65265233	65273940	711.118	344.953	87.5215	171.88	186.685	156.508	45.2434	353.494	201.155	844.029	952.79	369.652	664.219	582.349	949.165	1049.72	474.391	570.916	259.796
ENSG00000175061	NCRNA00188	non-protein coding RNA 188 [Source:HGNC Symbol;Acc:28619]	17	16342289	16367300	158.197	292.785	636.875	132.216	443.376	313.015	316.704	330.782	201.155	120.568	37.3643	618.977	1216.26	293.3	182.532	872.493	922.907	381.012	129.097
ENSG00000234741	GAS5	growth arrest-specific 5 (non-protein coding) [Source:HGNC Symbol;Acc:16355]	1	173833038	173838020	297.831	683.967	705.456	105.773	408.373	156.508	75.4057	344.782	181.039	74.1867	74.7286	353.682	772.614	175.152	383.317	872.493	508.893	626.257	215.472
ENSG00000225759	RP11-425M5.7		20	36247700	36251521	222.864	692.852	857.271	145.437	186.685	228.742	30.1623	142.849	30.1732	371.004	149.457	208.882	1262.09	170.255	164.279	95.429	232.883	630.825	485.108
ENSG00000245910	SNHG6	small nucleolar RNA host gene 6 (non-protein coding) [Source:HGNC Symbol;Acc:32965]	8	67833919	67838633	149.569	169.328	281.94	105.773	116.678	192.625	120.649	93.4412	170.981	204.014	0	70.2163	207.348	295.382	292.051	340.818	189.757	148.98	156.549
ENSG00000203875	SNHG5	small nucleolar RNA host gene 5 (non-protein coding) [Source:HGNC Symbol;Acc:21026]	6	86386725	86388451	48.4771	200.697	237.5	26.4431	396.705	120.391	60.3245	112.909	30.1732	426.624	0	187.01	182.422	34.9354	273.798	95.429	534.769	82.0296	82.8575
ENSG00000230513	AC002472.9		22	21356175	21364631	174.315	131.086	244.786	13.2216	175.017	108.351	45.2434	45.5056	1136.52	74.1967	74.7286	111.192	142.386	61.2874	273.798	54.5308	43.1265	110.482	105.145
ENSG00000246638	AC104759.1		15	31685046	31696932	232.748	155.418	84.3564	211.545	221.688	132.43	15.0811	270.548	241.386	111.32	579.147	62.0143	71.5079	175.71	0	0	25.8759	175.667	176.797
ENSG00000229807	XIST	X (inactive)-specific transcript (non-protein coding) [Source:HGNC Symbol;Acc:12810]	X	73040486	73072588	214.848	197.07	48.1102	26.4431	326.698	36.1172	15.0811	119.792	10.0577	0	18.6822	179.208	16.8699	201.715	127.772	463.512	284.635	226.038	52.8262
ENSG00000214548	MEG3	maternally expressed 3 (non-protein coding) [Source:HGNC Symbol;Acc:14575]	14	101292455	101327358	676.74	195.81	55.7567	0	221.688	12.0391	0	8.26126	40.2309	46.3617	186.822	94.3885	41.5453	331.48	91.2659	27.2654	8.6253	259.229	0.98371
ENSG00000176700	SCAND2	SCAN domain containing 2 pseudogene [Source:HGNC Symbol;Acc:10567]	15	85174682	85185695	198.119	110.853	44.1607	171.88	140.014	12.0391	15.0811	208.697	70.4041	37.0934	298.915	132.097	39.6567	134.174	91.2659	95.429	146.63	175.4	141.529
ENSG00000225733	AC090937.2		3	14961854	14989931	125.5	60.0703	104.105	26.4431	291.695	60.1953	105.568	183.616	120.693	18.5467	56.0465	150.668	106.507	130.233	237.291	81.7962	103.504	115.648	83.5493
ENSG00000130600	H19	H19, imprinted maternally expressed transcript (non-protein coding) [Source:HGNC Symbol;Acc:4713]	11	2016406	2022700	26.2699	11.2166	137.648	66.1078	0	24.0781	15.0811	11.9945	0	194.725	130.775	705.697	0	186.607	0	0	8.6253	538.227	1.96062
ENSG00000175701	NCRNA00116	non-protein coding RNA 116 [Source:HGNC Symbol;Acc:27339]	2	110969106	111002997	43.1001	32.4644	22.0067	13.2216	70.0068	349.133	75.4057	45.1233	40.2309	398.709	93.4108	25.2725	97.4424	47.171	91.2659	40.8981	94.8783	18.1404	29.4998
ENSG00000222041	NCRNA00152	non-protein coding RNA 152 [Source:HGNC Symbol;Acc:28717]	2	87754887	87906324	32.8083	269.833	44.3418	92.551	35.0034	120.391	15.0811	40.5948	10.0577	9.26836	74.7286	56.1463	32.4808	8.47043	54.7595	122.694	77.6277	455.309	74.0859
ENSG00000250682	CTD-2340E1.3		5	101944860	102007263	60.693	126.82	49.9121	158.659	116.678	48.1562	45.2434	96.2292	130.751	74.2067	205.504	28.1398	0	57.8428	54.7595	0	17.2506	43.1109	93.4859
ENSG00000232388	RP11-379J5.2		20	18548064	18550207	44.9936	62.4534	82.3334	52.8863	46.6712	120.391	75.4057	62.4751	50.2887	148.354	18.6822	85.6532	78.6838	49.5945	73.0127	81.7962	103.504	62.4503	64.066
ENSG00000224812	RP11-18M11.2		10	45306472	45455137	38.6031	110.607	246.295	52.8863	70.0068	60.1953	15.0811	39.7701	50.2887	74.1967	37.3643	31.0072	142.386	68.4399	36.5063	13.6327	112.129	100.381	51.0997
ENSG00000230925	RP11-176F3.7		9	33909913	33911120	70.1159	41.0369	23.679	39.6647	175.017	24.0781	15.0811	90.5743	70.4041	9.27833	280.232	40.8428	33.1104	63.988	54.7595	0	77.6277	79.6439	64.9814
ENSG00000233522	NCRNA00230A	non-protein coding RNA 230A [Source:HGNC Symbol;Acc:37736]	Y	20488139	20515096	92.7098	40.1321	18.9125	79.3294	151.681	36.1172	0	60.3556	40.2309	74.2167	168.139	60.6473	54.638	59.7233	0	95.429	51.7518	80.6198	63.1546
ENSG00000242808	SOX2OT	SOX2 overlapping transcript (non-protein coding) [Source:HGNC Symbol;Acc:20209]	3	180721562	181508734	122.078	35.7079	47.7125	0	58.339	24.0781	60.3245	57.8712	70.4041	9.27833	18.6822	35.2415	40.2862	50.9875	419.823	0	94.8783	45.439	8.65107
ENSG00000215039	AC005840.1		12	6548167	6560733	53.2289	46.1106	60.404	52.8863	105.01	120.391	45.2434	52.0963	70.4041	9.26836	56.0465	70.2163	81.202	86.7527	73.0127	27.2654	77.6277	38.0826	11.7047
ENSG00000245970	KB-1208A12.3	small nucleolar RNA, H/ACA box 72 (SNORA72), small nucleolar RNA [Source:RefSeq DNA;Acc:NR_002581]	8	99053954	99056349	18.6132	78.8754	57.8654	26.4431	23.3356	72.2343	15.0811	40.3394	120.693	27.825	56.0465	110.792	204.2	47.1333	36.5063	0	77.6277	78.2113	16.6672
ENSG00000255717	SNHG1	small nucleolar RNA host gene 1 (non-protein coding) [Source:HGNC Symbol;Acc:32688]	11	62619460	62623386	25.798	184.833	318.243	0	70.0068	24.0781	15.0811	19.4728	40.2309	18.5367	18.6822	23.9055	31.8513	47.692	18.2532	27.2654	25.8759	30.4858	155.681
ENSG00000236830	AP000689.8		21	37504065	37528605	101.493	38.3471	21.3211	39.6647	23.3356	24.0781	0	69.8334	70.4041	55.6401	149.457	19.6712	39.0271	49.4241	36.5063	149.96	77.6277	57.2216	47.1712
ENSG00000234072	AC074117.10		2	27579113	27590489	77.8613	55.3267	37.1518	92.551	35.0034	12.0391	45.2434	52.8922	150.866	37.0934	74.7286	23.9055	16.2404	58.6936	91.2659	54.5308	17.2506	63.943	60.7481
ENSG00000248272	AL593851.1		9	135894816	135896553	23.0879	97.7476	129.403	409.869	11.6678	12.0391	15.0811	28.613	0	0	37.3643	21.0382	24.6754	32.9055	0	0	103.504	37.1523	62.4437
ENSG00000245411	AC080037.2		17	70594180	70636611	25.9968	37.9865	14.7011	0	58.339	60.1953	45.2434	86.4526	50.2887	18.5467	56.0465	16.9372	96.1833	149.931	18.2532	0	43.1265	160.34	52.3182
ENSG00000224440	CXorf51	chromosome X open reading frame 51 [Source:HGNC Symbol;Acc:30533]	X	145895624	145896244	8.69689	18.288	42.8071	0	70.0068	48.1562	0	41.1244	352.021	9.26836	18.6822	16.9372	33.1104	17.4956	18.2532	177.225	43.1265	25.6032	44.6293
ENSG00000237883	AC073046.4		2	74174769	74208568	31.7523	26.4525	18.1698	0	455.044	0	0	204.473	20.1155	9.26836	74.7286	0	0	69.6313	0	13.6327	8.6253	28.1892	1.94414
ENSG00000232110	RP11-149I23.3		10	91043394	91051882	19.8806	60.448	73.2728	0	46.6712	48.1562	90.4868	75.182	10.0577	9.26836	18.6822	157.503	57.7857	33.6029	54.7595	0	69.0024	62.3755	33.5443
ENSG00000253352	TUG1	taurine upregulated 1 (non-protein coding) [Source:HGNC Symbol;Acc:26066]	22	31365643	31374831	60.1288	29.475	45.664	39.6647	58.339	0	45.2434	35.1313	110.635	27.835	37.3643	46.4441	57.1562	42.8588	91.2659	13.6327	60.3771	46.7449	70.9191
ENSG00000235621	RP1-66N13.3		20	46983957	46999372	6.36808	7.80379	6.16682	819.737	0	0	15.0811	1.40912	10.0577	0	0	12.7029	0	1.10866	0	0	34.5012	0	0
ENSG00000224851	RP11-236B18.4		10	92806923	92821916	15.5669	32.1263	2.48904	13.2216	58.339	0	0	80.6307	20.1155	0	448.372	8.46862	24.6754	26.3398	18.2532	0	25.8759	20.8315	116.577
ENSG00000248044	CTD-2653M23.2		5	36864527	36876759	38.3941	25.9521	11.8579	13.2216	46.6712	168.547	0	32.3964	20.1155	102.032	224.186	25.4059	8.43497	45.9595	0	27.2654	51.7518	48.5564	19.4095
ENSG00000255739	AP000689.1		21	37502670	37648524	34.0651	54.5364	70.0625	0	58.339	84.2734	45.2434	38.5647	60.3464	18.5567	0	84.4195	16.2404	42.689	36.5063	122.694	25.8759	86.8623	22.4359
ENSG00000230658	AC006039.4		7	23140847	23145322	0	0	0	0	0	0	0	0.637053	0	0	0	887.905	0	0.789322	0	0	0	0	0
ENSG00000223675	RP11-86H7.6		1	95051112	95057853	52.4138	20.8565	31.7034	0	81.6746	12.0391	0	152.12	30.1732	0	74.7286	4.23431	15.6109	21.5686	18.2532	0	17.2506	120.43	223.101
ENSG00000232860	RP11-74N20.1		1	183430009	183441400	61.0831	41.776	24.8998	79.3294	58.339	0	0	65.6573	40.2309	18.5567	149.457	21.0382	7.80543	45.0687	18.2532	13.6327	69.0024	97.9282	63.9754
ENSG00000227090	AP000402.3		21	26258990	26275070	57.7121	62.041	22.0912	118.994	23.3356	0	30.1623	26.8024	10.0577	0	261.55	28.1398	15.6109	42.5673	18.2532	0	34.5012	15.6059	101.946
ENSG00000142396	ERVK3-1	endogenous retrovirus group K3, member 1 [Source:HGNC Symbol;Acc:30466]	19	58816715	58827023	33.3544	68.728	44.6585	39.6647	58.339	36.1172	45.2434	28.6409	50.2887	18.5367	18.6822	30.8738	16.8699	34.812	73.0127	27.2654	69.0024	104.577	43.018
ENSG00000225828	RP4-811H24.6		1	32826871	32829879	25.9193	10.0482	3.51074	0	11.6678	24.0781	0	8.9341	392.252	176.169	0	5.6013	33.7399	15.4978	0	40.8981	25.8759	14.4704	13.6322
ENSG00000236894	RP11-128B16.3		10	26866605	26868236	35.7811	58.9324	33.0828	26.4431	11.6678	12.0391	30.1623	39.7687	80.4619	9.26836	74.7286	67.6156	8.43497	72.7469	109.519	27.2654	17.2506	52.4388	33.8645
ENSG00000175873	AC004840.9		7	2477398	2487485	17.5132	156.53	67.8188	39.6647	0	0	15.0811	36.5877	0	0	0	8.46862	31.2217	24.7525	18.2532	0	0	129.971	238.306
ENSG00000225151	AC103965.1		15	84867600	84898890	25.9604	20.1111	39.8079	66.1078	46.6712	0	0	159.504	70.4041	18.5467	37.3643	8.46862	23.4163	56.2031	36.5063	136.327	17.2506	7.98138	6.67301
ENSG00000231721	AC058791.2		7	130626519	130794935	37.2795	42.3572	19.5235	0	163.349	36.1172	30.1623	106.677	30.1732	0	37.3643	25.4059	8.43497	52.8119	18.2532	40.8981	34.5012	54.1993	36.1116
ENSG00000153363	C1orf97	chromosome 1 open reading frame 97 [Source:HGNC Symbol;Acc:28227]	1	211556145	211605878	5.33752	1.93321	11.9366	0	23.3356	60.1953	15.0811	16.4003	512.944	37.0734	0	9.83561	7.80543	3.78934	18.2532	13.6327	17.2506	2.20226	1.83736
ENSG00000196756	RP4-564F22.2		20	37049235	37063996	41.7621	91.4283	92.8393	39.6647	11.6678	0	30.1623	46.2346	10.0577	0	18.6822	40.7094	83.7202	55.4928	54.7595	40.8981	34.5012	46.6745	9.6778
ENSG00000249381	RP11-310A13.1		4	139346677	139358023	10.6846	36.6768	0.404962	0	0	0	0	4.74909	0	0	523.1	0	7.80543	11.4141	0	0	86.253	45.5316	11.753
ENSG00000186594	C17orf91	chromosome 17 open reading frame 91 [Source:HGNC Symbol;Acc:28219]	17	1614805	1619504	18.6562	82.681	8.14381	0	58.339	48.1562	75.4057	17.3364	0	9.26836	18.6822	36.6085	8.43497	17.3977	54.7595	27.2654	198.382	42.8728	6.77128
ENSG00000206552	RP11-141M3.3		3	42975744	42978277	21.9998	6.07448	30.8814	13.2216	0	0	15.0811	3.36438	110.635	306.005	130.775	5.6013	16.2404	18.5264	0	0	8.6253	22.6726	15.6605
ENSG00000224897	RP11-3B12.1		7	124569927	124819369	43.2985	21.811	24.1799	0	11.6678	60.1953	45.2434	22.8567	70.4041	27.815	56.0465	67.6156	16.2404	42.2069	73.0127	40.8981	43.1265	39.0107	12.4793
ENSG00000253842	KB-173C10.1		8	101441062	101443225	5.14489	38.7397	5.87799	26.4431	140.014	156.508	0	48.1301	0	55.65	74.7286	12.7029	59.0448	3.03318	18.2532	0	17.2506	4.40451	33.0872
ENSG00000235453	C9orf133	chromosome 9 open reading frame 133 [Source:HGNC Symbol;Acc:31420]	9	32551142	32567003	15.3091	6.14173	26.136	0	35.0034	72.2343	30.1623	73.3905	100.577	0	0	25.2725	48.0917	68.4275	54.7595	13.6327	86.253	2.90786	35.2828
ENSG00000248223	CTD-2139B15.2		5	17354019	17355008	3.27283	21.1869	8.82016	290.874	11.6678	24.0781	0	8.26377	70.4041	0	112.093	12.7029	7.80543	31.6547	0	27.2654	17.2506	21.6673	22.1374
ENSG00000250457	AC010976.1		2	128317620	128322364	93.1212	40.3666	9.90812	52.8863	35.0034	12.0391	30.1623	33.8933	20.1155	0	149.457	15.4369	0	40.3411	18.2532	27.2654	8.6253	34.0468	46.6056
ENSG00000228067	RP11-61J19.3		1	212719036	212729407	35.9426	37.293	32.0432	0	81.6746	0	0	87.6339	10.0577	0	186.822	9.83561	7.80543	38.0907	18.2532	0	8.6253	18.5737	79.2391
ENSG00000233985	RP11-297H3.3		1	170143544	170210428	30.9429	35.3356	86.5621	0	11.6678	12.0391	15.0811	44.653	50.2887	0	0	54.646	24.0458	72.502	36.5063	13.6327	103.504	21.9599	33.7652
ENSG00000225783	MIAT	myocardial infarction associated transcript (non-protein coding) [Source:HGNC Symbol;Acc:33425]	22	27042392	27072438	191.065	4.35645	74.2048	13.2216	23.3356	0	0	42.9723	20.1155	9.26836	0	21.0382	7.80543	86.6735	36.5063	13.6327	8.6253	61.0177	30.9273
ENSG00000227695	DNMBP-AS1	DNMBP antisense RNA 1 (non-protein coding) [Source:HGNC Symbol;Acc:20431]	10	101686767	101718138	66.0991	40.9939	19.8916	26.4431	23.3356	12.0391	30.1623	37.2174	40.2309	9.27833	112.093	0	39.0271	36.2403	0	13.6327	34.5012	51.6498	51.2477
ENSG00000243565	AC009950.1		2	231067826	231099681	9.53971	27.2903	3.3055	515.641	23.3356	0	0	10.0694	0	0	0	0	7.80543	3.75976	0	13.6327	0	12.7066	7.81458
ENSG00000237283	RP11-316I3.1		1	188674754	188680011	5.38902	10.7662	34.6022	39.6647	70.0068	96.3124	60.3245	47.3147	20.1155	27.815	0	31.0072	23.4163	25.9551	18.2532	27.2654	77.6277	8.69126	9.65228
ENSG00000204272	RP11-622K12.1		X	56755677	56844813	42.7157	27.628	61.3335	0	70.0068	0	0	44.3992	20.1155	0	37.3643	26.6395	55.8971	26.9831	18.2532	54.5308	77.6277	43.5622	24.4741
ENSG00000256880	AC112484.1		3	128679210	128684200	3.23998	3.77854	403.904	185.102	0	0	0	5.04486	0	0	0	4.23431	0	13.5383	0	0	0	5.37072	1.01229
ENSG00000198592	RP11-144J4.1		12	122830348	122837333	36.0134	58.6405	22.8919	79.3294	58.339	12.0391	15.0811	48.0843	10.0577	55.6401	18.6822	30.8738	24.0458	19.1923	18.2532	13.6327	8.6253	35.9453	48.1628
ENSG00000108504	C17orf106	chromosome 17 open reading frame 106 [Source:HGNC Symbol;Acc:37242]	17	73975312	74002080	18.1108	24.1106	21.411	52.8863	70.0068	36.1172	15.0811	32.438	40.2309	0	18.6822	82.7858	41.5453	9.11405	0	27.2654	43.1265	40.3071	37.9836
ENSG00000238121	RP11-374F3.4		13	30914407	30951282	18.7892	49.2107	5.9324	0	35.0034	60.1953	0	3.64654	10.0577	0	56.0465	5.6013	72.767	3.40803	73.0127	13.6327	17.2506	79.465	106.497
ENSG00000248744	RP11-362I1.1		4	45011557	45053669	28.3353	13.1381	23.5227	39.6647	70.0068	12.0391	15.0811	89.313	20.1155	0	37.3643	9.83561	15.6109	16.2709	91.2659	27.2654	17.2506	22.9256	57.5004
ENSG00000249705	AC022413.1		5	180256956	180258618	18.3804	27.774	13.2188	52.8863	116.678	0	45.2434	29.0832	0	0	0	37.9754	0	48.0616	18.2532	54.5308	17.2506	18.5148	106.275
ENSG00000170233	AC055839.1		17	5402759	5404465	120.701	4.38748	12.1625	0	0	12.0391	0	74.9357	30.1732	0	0	11.2026	84.3497	26.0785	146.025	0	43.1265	11.1842	18.4027
ENSG00000250033	RP11-725C19.1		4	138978618	139099331	72.6305	18.4769	16.7963	0	11.6678	24.0781	0	41.7827	20.1155	27.825	37.3643	25.2725	31.8513	47.3518	0	109.062	69.0024	5.84559	14.6015
ENSG00000187186	RP11-195F19.5		9	34664780	34666109	50.0459	15.0932	11.972	0	0	36.1172	15.0811	8.2561	251.443	37.0834	0	0	24.6754	33.8408	36.5063	0	43.1265	5.05123	0
ENSG00000248872	RP11-344G13.1		4	171961753	171980314	42.1623	27.2987	54.9092	0	23.3356	24.0781	0	35.5242	40.2309	27.825	56.0465	12.7029	62.4434	40.8397	18.2532	0	25.8759	49.5642	23.1196
ENSG00000248360	RP11-458B24.2		4	14475711	14889793	55.3386	44.8638	37.1102	105.773	11.6678	0	0	12.8593	0	0	0	23.9055	15.6109	44.5246	18.2532	0	17.2506	110.925	51.3806
ENSG00000224281	RP3-404F18.2		X	118599997	118603061	2.14904	3.35162	7.52486	0	0	12.0391	15.0811	8.90477	30.1732	9.26836	0	4.23431	8.43497	8.02036	401.57	13.6327	17.2506	2.14337	4.91728
ENSG00000248000	AC138128.1		19	45976341	45978414	2.14904	82.4874	2.11655	0	0	0	0	0.44827	0	0	224.186	0	0	1.2943	0	0	69.0024	94.8667	58.9095
ENSG00000227066	RP3-340N1.2		1	20480831	20487061	0	0.937051	0	0	46.6712	0	15.0811	60.4687	0	0	0	9.83561	8.43497	1.9528	0	68.1635	319.136	0	0
ENSG00000235026	AC066593.1		2	115888512	115918920	6.77731	10.5815	15.1399	0	58.339	12.0391	0	7.86147	40.2309	315.294	18.6822	4.23431	0	11.8534	0	0	8.6253	2.20226	15.5786
ENSG00000229839	AC018462.2		2	62296582	62374016	9.78564	21.2802	51.3284	39.6647	0	36.1172	0	28.6168	0	18.5567	0	22.4052	195.765	11.6573	0	0	0	72.6065	10.7753
ENSG00000229191	RP11-168O16.1		1	200993077	200997920	22.7166	12.0678	6.15184	0	11.6678	48.1562	60.3245	27.1779	50.2887	9.26836	18.6822	28.1398	48.0917	32.8404	18.2532	68.1635	8.6253	39.2156	4.85568
ENSG00000234277	CTD-2090I13.1		1	227581292	227618736	12.1332	31.375	14.1205	158.659	23.3356	0	0	24.2765	10.0577	9.26836	37.3643	9.83561	97.4424	6.56147	0	40.8981	8.6253	16.6438	6.85797
ENSG00000226179	PPP2R3B-AS1	PPP2R3B antisense RNA 1 (non-protein coding) [Source:HGNC Symbol;Acc:27560]	X	281725	282586	39.682	18.4085	18.7124	13.2216	93.3424	12.0391	0	42.2082	0	0	112.093	16.9372	8.43497	40.4273	36.5063	0	0	16.5721	38.3839
ENSG00000247595	RP11-504G3.1		11	18621334	18631802	43.8949	14.7639	8.32203	0	0	24.0781	0	12.0238	201.155	0	37.3643	28.1398	0	3.09279	36.5063	13.6327	17.2506	25.7823	29.4929
ENSG00000237463	RP11-280O1.2		1	165446078	165551392	4.59941	32.6407	38.8451	0	46.6712	12.0391	0	6.71424	0	9.27833	0	258.593	0	6.12217	0	13.6327	51.7518	12.0225	0
ENSG00000230606	AC159540.1		2	98081683	98091049	59.9012	26.9205	4.9937	0	23.3356	0	0	95.9175	60.3464	0	18.6822	0	16.2404	53.3393	36.5063	40.8981	17.2506	8.27858	25.7116
ENSG00000253738	GS1-251I9.4		8	92072137	92082417	40.3765	15.3514	26.038	0	58.339	0	60.3245	36.059	90.5196	0	0	12.7029	8.43497	46.9715	18.2532	0	43.1265	13.5042	13.6063
ENSG00000185716	C16orf52	chromosome 16 open reading frame 52 [Source:HGNC Symbol;Acc:27087]	16	22019456	22098855	34.8059	30.4643	22.8067	39.6647	23.3356	12.0391	0	16.2698	60.3464	9.27833	18.6822	12.7029	8.43497	31.9833	0	40.8981	77.6277	27.6808	9.85064
ENSG00000177112	RP11-58H20.3		11	10562819	10621479	2.31414	0.937051	4.72053	0	0	0	0	15.8583	432.482	0	0	0	0	1.86338	18.2532	0	0	0	0
ENSG00000246526	RP11-539L10.2		4	6689175	6692246	9.78759	3.94135	104.151	13.2216	0	36.1172	75.4057	8.79122	20.1155	9.26836	18.6822	43.5767	0	21.5514	36.5063	40.8981	17.2506	7.63186	6.56528
ENSG00000235011	RP4-726F1.1		1	79789454	79790534	12.7517	41.9909	20.839	39.6647	23.3356	24.0781	30.1623	18.3781	0	0	18.6822	18.3042	8.43497	15.5919	18.2532	40.8981	43.1265	48.132	44.8105
ENSG00000248771	RP11-294O2.2		4	165675216	165724947	23.9414	16.2476	31.4916	13.2216	35.0034	12.0391	30.1623	37.7727	30.1732	0	18.6822	22.5385	16.2404	18.7042	36.5063	27.2654	34.5012	23.5166	39.3351
ENSG00000253982	CTD-2336O2.1		8	1710156	1712668	24.3215	32.465	12.58	39.6647	23.3356	24.0781	0	15.9496	0	0	74.7286	16.8039	15.6109	24.7532	73.0127	13.6327	34.5012	18.0292	21.5795
ENSG00000236200	RP11-184I16.2		1	44165436	44173809	27.7786	23.812	19.6701	0	58.339	12.0391	30.1623	26.2626	20.1155	18.5467	37.3643	15.4369	8.43497	33.9787	54.7595	27.2654	8.6253	23.168	14.5879
ENSG00000234616	JRK	jerky homolog (mouse) [Source:HGNC Symbol;Acc:6199]	8	143738874	143763386	28.4254	9.70222	9.78827	13.2216	23.3356	24.0781	90.4868	69.5202	0	0	18.6822	8.46862	7.80543	13.9663	18.2532	68.1635	25.8759	18.9927	8.82033
ENSG00000238227	C9orf69	chromosome 9 open reading frame 69 [Source:HGNC Symbol;Acc:31009]	9	139006427	139010709	25.8816	19.0717	24.7796	13.2216	23.3356	48.1562	15.0811	38.0776	40.2309	0	0	14.0699	32.4808	16.3565	18.2532	54.5308	25.8759	2.90786	45.2597
ENSG00000247629	RP11-707G14.6		11	73594907	73597748	37.4597	17.5188	15.3762	0	0	60.1953	15.0811	14.0905	100.577	0	18.6822	22.5385	48.7212	39.9608	36.5063	0	8.6253	15.1694	2.80943
ENSG00000247516	RP11-480D4.3		5	8457606	8460776	16.1268	7.0375	1.31818	0	0	132.43	15.0811	22.3709	40.2309	74.1768	18.6822	5.6013	8.43497	17.8417	0	0	86.253	6.54788	0
ENSG00000249348	RP11-814P23.1		4	39529639	39596327	32.2598	22.2591	6.86068	105.773	23.3356	12.0391	30.1623	16.6623	10.0577	27.825	0	0	70.2488	15.3309	18.2532	0	8.6253	20.8439	29.0551
ENSG00000247217	AC008392.1		19	48758932	48761452	10.6733	8.28168	6.27117	13.2216	0	12.0391	15.0811	5.03424	0	268.912	37.3643	8.46862	0	14.477	0	0	17.2506	9.35292	17.6644
ENSG00000227278	RP11-656D10.5		1	40980133	40980729	22.6188	11.8436	25.4697	13.2216	46.6712	24.0781	15.0811	18.5116	30.1732	9.26836	0	8.46862	16.2404	23.9558	54.7595	81.7962	0	6.43012	34.7594
ENSG00000243795	RP11-572M11.3		3	112861197	112886666	12.9271	13.6586	14.6767	13.2216	35.0034	24.0781	30.1623	39.548	40.2309	0	18.6822	35.1081	16.8699	29.6576	36.5063	0	60.3771	13.782	8.65158
ENSG00000235100	RP11-80H5.4		10	91426944	91461177	22.9219	8.26056	11.7865	13.2216	0	108.351	15.0811	25.8365	10.0577	18.5367	0	68.8493	8.43497	19.6544	54.7595	0	17.2506	9.85758	25.663
ENSG00000243836	RP4-555L14.5		7	151106247	151110440	30.5094	6.97619	10.1043	0	23.3356	24.0781	0	220.976	10.0577	0	0	8.46862	0	3.26635	0	0	77.6277	13.8537	6.72544
ENSG00000246379	AC007495.1		16	56126899	56225006	13.3107	4.16929	8.85643	26.4431	46.6712	24.0781	105.568	9.93405	20.1155	9.26836	18.6822	4.23431	8.43497	10.4455	0	68.1635	43.1265	11.3019	1.97294
ENSG00000241990	RP6-109B7.3		22	46449585	46453090	9.4609	10.6937	0.763628	13.2216	11.6678	84.2734	30.1623	31.4705	0	101.992	0	0	31.8513	21.4678	0	27.2654	34.5012	13.115	8.64144
ENSG00000224400	AC010880.1		2	16535524	16613970	8.96319	20.4094	7.97723	13.2216	0	0	0	32.2302	30.1732	9.26836	18.6822	8.46862	0	158.307	0	0	25.8759	25.4897	61.8293
ENSG00000230894	RP11-67K19.3		9	119330728	119348607	10.6846	7.72363	32.6527	13.2216	11.6678	0	0	39.8559	30.1732	37.1034	0	14.0699	7.80543	34.6733	0	0	34.5012	6.83852	136.623
ENSG00000223859	AC007403.3		2	67267678	67269098	66.9404	11.8795	0.763628	0	140.014	0	0	41.4131	0	0	93.4108	0	8.43497	19.1723	0	0	0	27.0186	5.89296
ENSG00000224310	AC012317.1		16	24672743	24682383	43.3314	42.2368	11.2251	26.4431	35.0034	0	0	34.7833	10.0577	9.27833	37.3643	8.46862	7.80543	28.089	0	0	34.5012	67.1122	17.6239
ENSG00000229531	RP1-102G20.5		1	174904084	174923398	44.6843	57.2821	42.1342	26.4431	58.339	0	0	15.0775	10.0577	0	0	28.1398	24.6754	9.83385	0	0	17.2506	32.1296	43.7994
ENSG00000227269	RP11-96L7.2		9	101945655	101947173	36.6827	41.3558	23.9467	13.2216	0	12.0391	0	12.849	0	18.5567	37.3643	9.83561	32.4808	31.7614	54.7595	0	17.2506	34.241	29.2323
ENSG00000170919	XXyac-R12DG2.2		13	45915480	45965872	43.2722	56.629	16.4486	13.2216	0	12.0391	0	31.3801	10.0577	27.835	37.3643	35.1081	0	37.5913	0	0	17.2506	39.6799	23.1376
ENSG00000250280	RP11-305O6.3		12	65675437	65680508	40.6051	9.18865	12.3961	26.4431	58.339	12.0391	15.0811	28.4815	10.0577	27.825	37.3643	5.6013	23.4163	27.2981	0	0	0	24.5042	38.7626
ENSG00000245927	AC005632.1		16	21601019	21610706	67.8842	15.2168	6.87487	13.2216	35.0034	0	0	19.2938	0	37.0834	74.7286	4.23431	15.6109	19.1404	0	13.6327	17.2506	34.0424	14.5176
ENSG00000225973	AC018926.1		15	55609382	55611243	9.11588	6.86854	18.1172	13.2216	11.6678	48.1562	75.4057	39.4033	10.0577	0	18.6822	50.6784	7.80543	17.6982	18.2532	0	17.2506	5.4296	16.6972
ENSG00000249604	RP11-286E11.2		4	108857187	108862411	5.42187	24.8067	31.6082	0	23.3356	24.0781	0	24.0962	30.1732	18.5467	56.0465	12.7029	15.6109	14.1131	18.2532	13.6327	17.2506	34.2003	19.6777
ENSG00000197989	SNHG12	small nucleolar RNA host gene 12 (non-protein coding) [Source:HGNC Symbol;Acc:30062]	1	28905050	28909495	23.703	73.8704	13.2163	26.4431	0	0	15.0811	19.8383	20.1155	0	0	8.46862	16.8699	36.7001	18.2532	27.2654	34.5012	36.6583	9.7486
ENSG00000227912	RP11-69C17.3		10	2208526	2211654	0	0	0	0	23.3356	204.664	0	0	0	46.3518	93.4108	0	8.43497	1.67614	0	0	0	0	0
ENSG00000254635	RP11-164A7.1		10	28811581	28821672	53.7087	15.8267	23.8436	0	0	24.0781	0	24.9457	0	18.5567	18.6822	23.9055	31.8513	26.1025	0	40.8981	43.1265	9.04306	17.4103
ENSG00000214654	RP11-27I1.6	UDP-GlcNAc:betaGal beta-1,3-N-acetylglucosaminyltransferase 5 pseudogene (LOC100288842), non-coding RNA [Source:RefSeq DNA;Acc:NR_027442]	9	123555829	123561845	14.4032	38.6734	20.6699	13.2216	11.6678	0	0	39.4937	10.0577	18.5567	0	30.8738	40.2862	16.729	0	0	17.2506	65.1836	32.2207
ENSG00000236824	BCYRN1	brain cytoplasmic RNA 1 (non-protein coding) [Source:HGNC Symbol;Acc:1022]	2	47558199	47571656	41.1109	12.237	9.97305	13.2216	23.3356	12.0391	0	26.7833	20.1155	18.5367	56.0465	0	7.80543	20.2952	18.2532	0	25.8759	30.8218	30.7376
ENSG00000255480	RP4-710M3.2		11	30447099	30450815	32.5835	8.78688	3.54945	13.2216	128.346	0	0	54.7716	10.0577	37.1034	0	12.7029	0	27.7118	0	0	0	22.4766	12.7277
ENSG00000227955	RP11-305E6.1		10	30569015	30569839	17.4837	14.6693	69.5511	0	11.6678	0	0	58.601	30.1732	0	0	4.23431	16.2404	33.0883	18.2532	27.2654	25.8759	7.60301	26.2616
ENSG00000237949	RP11-456A18.1		10	60759386	60761303	14.9287	1.11618	0.434489	0	0	12.0391	0	0.604053	0	9.27833	0	4.23431	16.8699	58.4902	237.291	0	0	0	0
ENSG00000234186	C16orf82	chromosome 16 open reading frame 82 [Source:HGNC Symbol;Acc:30755]	16	27078028	27080486	6.20609	4.50691	5.23905	0	11.6678	0	0	6.02316	281.616	0	0	0	0	15.4587	18.2532	0	0	2.14337	3.90897
ENSG00000225179	RP11-16D22.1		13	35009587	35214822	0.545472	2.22385	1.79739	0	0	0	0	130.967	0	0	18.6822	0	8.43497	29.4119	0	149.96	0	10.9118	0
ENSG00000242759	RP11-280F2.2		3	106555658	106959488	8.59616	5.30685	3.87679	26.4431	23.3356	0	45.2434	31.2764	20.1155	0	37.3643	39.3424	8.43497	12.6493	0	13.6327	43.1265	10.7758	21.4295
ENSG00000255857	RP1-278C19.3		12	120639094	120650941	14.3437	31.476	15.1356	0	70.0068	0	15.0811	28.0449	10.0577	0	18.6822	18.3042	16.8699	29.1155	18.2532	13.6327	8.6253	27.1476	14.5896
ENSG00000248743	AL590365.1		10	15211104	15221737	35.3996	6.0155	28.8156	13.2216	0	0	0	5.12722	0	0	18.6822	4.23431	33.7399	20.4269	109.519	0	43.1265	17.2064	5.85226
ENSG00000256193	RP11-749H20.6		12	128399917	128436097	0	4.45621	3.99035	0	11.6678	0	226.217	4.30674	0	37.0834	0	9.83561	0	14.6138	0	0	17.2506	2.14337	4.80809
ENSG00000228013	RP11-350G8.5		1	154374804	154379040	10.6049	8.35919	4.14114	13.2216	23.3356	12.0391	15.0811	10.6568	30.1732	0	37.3643	11.2026	0	12.5292	0	109.062	25.8759	2.90786	9.56892
ENSG00000203645	RP11-706D8.2		3	177012230	177041206	0.545472	4.00125	1.49475	290.874	0	12.0391	0	0.464916	0	9.27833	0	5.6013	0	3.11766	0	0	0	4.75403	0
ENSG00000205682	RP11-798L4.1		4	62285964	62293939	0.545472	12.2357	43.4536	39.6647	11.6678	0	15.0811	10.9254	0	0	93.4108	28.0065	15.6109	4.75418	0	27.2654	8.6253	4.28675	16.2648
ENSG00000218109	NCRNA00288	non-protein coding RNA 288 [Source:HGNC Symbol;Acc:26855]	11	126872805	126875953	10.1535	24.573	13.6694	13.2216	23.3356	0	45.2434	12.8858	0	0	18.6822	28.1398	16.2404	4.02433	54.7595	0	25.8759	29.3783	10.4373
ENSG00000187621	TCL6	T-cell leukemia/lymphoma 6 (non-protein coding) [Source:HGNC Symbol;Acc:13463]	14	96116835	96158965	14.0752	6.11374	9.36997	26.4431	46.6712	72.2343	30.1623	10.1898	10.0577	18.5567	18.6822	18.3042	8.43497	5.92672	0	13.6327	8.6253	4.40451	5.90497
ENSG00000254511	RP11-876F14.1		11	81682036	81698855	71.8064	7.44812	10.9848	0	0	12.0391	0	7.21997	10.0577	9.26836	18.6822	0	24.0458	91.8491	18.2532	0	0	42.9196	0
ENSG00000254330	RP11-1D12.1		8	65616331	65647016	21.2935	8.18129	3.02141	0	0	0	15.0811	19.7245	0	0	0	0	70.2488	11.9079	36.5063	0	129.379	5.77912	1.85891
ENSG00000228623	ZNF883	zinc finger protein 883 [Source:HGNC Symbol;Acc:27271]	9	115759495	115774507	14.3833	4.38546	16.5301	0	35.0034	60.1953	15.0811	15.8223	30.1732	0	18.6822	21.1715	0	18.6101	36.5063	0	34.5012	0	0
ENSG00000226917	RP11-328M4.3		6	41470182	41487590	57.974	0	2.77781	0	11.6678	24.0781	0	21.6498	10.0577	0	0	8.46862	25.3049	57.2669	54.7595	13.6327	8.6253	21.1244	0
ENSG00000245410	AC132872.3		17	80200543	80203317	4.36377	9.58401	31.5823	26.4431	0	0	0	7.25779	10.0577	27.825	18.6822	30.8738	7.80543	35.0296	18.2532	0	17.2506	40.81	29.9373
ENSG00000250666	RP11-463J17.1		4	190802670	190806023	5.45472	37.571	32.1508	13.2216	35.0034	12.0391	0	9.55556	20.1155	0	18.6822	0	8.43497	12.8802	18.2532	0	8.6253	49.7197	33.1895
ENSG00000228801	RP11-110G21.1		8	52811885	52859733	19.6897	14.7359	10.9874	0	23.3356	24.0781	15.0811	18.5639	50.2887	0	18.6822	14.0699	0	32.3732	54.7595	0	8.6253	7.19461	0.988553
ENSG00000233349	RP11-427O13.3		13	85136499	85137371	1.09094	28.6801	6.31229	0	11.6678	60.1953	0	0.480446	0	0	149.457	0	0	3.29265	0	0	8.6253	42.3579	0
ENSG00000249267	RP5-916L7.1		12	126443234	126467920	3.27283	9.94374	5.85852	52.8863	0	0	0	9.96285	10.0577	0	37.3643	8.46862	8.43497	4.01102	0	27.2654	112.129	9.39686	12.4876
ENSG00000230937	CTA-55I10.1	NPC-A-5 (LOC642587), mRNA [Source:RefSeq DNA;Acc:NM_001104548]	1	209602165	209606183	1.63641	145.321	14.7254	52.8863	11.6678	0	0	29.3389	0	9.26836	0	5.6013	24.6754	3.49251	0	0	0	7.20955	4.93358
ENSG00000228918	GS1-122H1.2		1	182098445	182283196	26.0018	13.4252	14.034	26.4431	58.339	0	0	32.8027	10.0577	0	56.0465	0	7.80543	22.8542	0	0	0	25.3844	16.3363
ENSG00000231771	RP11-147O5.1		X	21911718	21920026	23.0907	17.0459	7.0426	13.2216	35.0034	0	0	15.9052	30.1732	0	37.3643	28.1398	7.80543	30.5647	0	0	34.5012	9.8202	18.4071
ENSG00000241754	RP11-280H21.1		3	102382007	102392757	17.6619	2.34818	4.86596	0	46.6712	36.1172	15.0811	8.28202	20.1155	37.1133	18.6822	9.83561	16.2404	19.3651	18.2532	13.6327	17.2506	2.90786	2.97291
ENSG00000224761	RP11-508N22.8		10	38464596	38501285	0	22.4281	0	0	0	0	15.0811	0.811057	10.0577	0	205.504	0	7.80543	0	0	0	17.2506	8.39737	18.3498
ENSG00000249508	AC124945.1		3	109056665	109101875	7.09332	11.4626	6.28035	13.2216	46.6712	12.0391	0	26.9257	80.4619	0	18.6822	18.3042	0	24.4411	18.2532	0	8.6253	2.14337	10.574
ENSG00000224945	RP11-82L18.2		9	91703519	91724849	5.51394	5.56134	6.77791	0	11.6678	0	30.1623	156.978	0	9.27833	18.6822	5.6013	0	0	18.2532	27.2654	0	6.54788	2.83098
ENSG00000250616	AC012645.1		16	30107751	30116777	2.85961	3.33766	21.2937	39.6647	11.6678	0	135.73	5.03328	10.0577	0	18.6822	0	7.80543	10.7984	18.2532	0	0	12.772	6.82603
ENSG00000246181	AC022409.1		19	23582041	23598873	5.69036	6.70457	17.412	13.2216	0	0	15.0811	122.679	20.1155	9.27833	18.6822	4.23431	7.80543	11.6529	18.2532	0	8.6253	12.9094	11.6162
ENSG00000215248	AC087203.1		8	12064280	12312147	12.0669	10.2975	8.68798	0	11.6678	0	30.1623	30.6266	30.1732	0	56.0465	29.5068	8.43497	15.5651	0	13.6327	25.8759	6.1352	14.3176
ENSG00000250044	AC011489.1		19	45632292	45641075	19.5024	17.8707	14.5691	0	46.6712	0	0	16.2937	0	9.26836	37.3643	9.83561	15.6109	14.0765	36.5063	0	0	45.2213	18.2908
ENSG00000224531	RP4-761I2.2		6	11094039	11138964	36.9242	26.7072	15.0541	26.4431	11.6678	12.0391	0	3.17812	50.2887	0	0	14.0699	0	24.4562	36.5063	0	17.2506	20.2871	5.65182
ENSG00000249673	C4orf10	chromosome 4 open reading frame 10 [Source:HGNC Symbol;Acc:20205]	4	2936626	2963465	13.338	3.56942	6.50827	13.2216	11.6678	0	0	6.01232	30.1732	83.4451	0	0	0	9.04083	18.2532	27.2654	17.2506	2.9228	56.0082
ENSG00000237370	AC010907.2		2	3650987	3651832	22.6924	15.2662	13.8329	39.6647	23.3356	0	0	13.7834	0	18.5467	37.3643	4.23431	23.4163	15.5083	0	0	0	44.8555	24.4448
ENSG00000228126	RP11-54A4.8		1	150488233	150490508	26.3342	3.60017	4.26527	52.8863	11.6678	0	0	15.3046	30.1732	27.825	18.6822	5.6013	16.2404	13.9159	0	0	8.6253	21.6756	39.7343
ENSG00000224490	AC010127.5		2	166790367	166806401	3.23998	5.70941	10.3856	0	23.3356	0	30.1623	9.1991	10.0577	0	0	105.724	0	13.8935	36.5063	0	43.1265	0	4.84549
ENSG00000197934	AP001597.1		21	27765954	27941571	5.14489	6.1886	1.59374	0	11.6678	0	15.0811	2.78931	10.0577	0	205.504	0	0	0	0	0	0	10.8968	27.0564
ENSG00000255545	RP11-627G23.1		11	134306367	134375507	41.7979	1.97282	4.94396	0	11.6678	48.1562	0	7.21666	40.2309	0	0	4.23431	8.43497	86.9836	36.5063	0	0	2.90786	0
ENSG00000251152	RP11-281P23.1		4	11470874	11479820	10.5113	14.6649	8.19954	0	35.0034	36.1172	15.0811	7.91984	0	18.5467	18.6822	33.7411	8.43497	11.3563	0	0	8.6253	28.2409	38.9196
ENSG00000233184	RP11-421L21.3		1	101491409	101552821	9.2923	8.04443	6.49587	0	11.6678	12.0391	15.0811	16.3713	50.2887	0	18.6822	9.83561	16.8699	9.14854	36.5063	13.6327	34.5012	17.8821	6.76853
ENSG00000231025	RP11-175O19.4		10	98752207	98755716	9.09544	14.5197	29.0324	0	46.6712	0	0	8.63941	40.2309	0	18.6822	5.6013	0	6.75137	36.5063	13.6327	17.2506	30.6426	10.9574
ENSG00000245937	CTC-228N24.3		5	127276118	127418792	14.5625	9.52557	33.4455	0	23.3356	24.0781	0	21.0461	0	9.26836	18.6822	4.23431	8.43497	45.918	18.2532	27.2654	17.2506	8.33746	3.86065
ENSG00000189223	AC016683.6		2	113969099	114024587	13.6966	8.30917	7.98252	52.8863	0	12.0391	0	22.0882	20.1155	0	18.6822	22.5385	0	5.71154	18.2532	40.8981	0	23.1296	17.3993
ENSG00000204517	AL627443.1		6	166511208	166513125	46.8133	47.6931	29.1624	0	11.6678	12.0391	30.1623	12.1348	10.0577	0	0	8.46862	0	7.49913	18.2532	27.2654	0	12.2982	9.66864
ENSG00000247556	AC012652.1		15	41576203	41601901	3.27283	7.03674	46.2945	13.2216	23.3356	0	30.1623	8.67013	10.0577	37.0934	18.6822	18.3042	7.80543	13.9745	0	27.2654	0	5.77912	10.5096
ENSG00000236120	RP11-733O18.1		X	5571462	5644346	5.52837	69.1093	24.9127	26.4431	0	0	0	5.18529	0	0	0	0	7.80543	2.08506	18.2532	0	17.2506	96.239	6.96667
ENSG00000243319	RP11-347N5.2		13	102945286	103054799	0	1.24827	0	0	0	0	0	0	0	278.3	0	0	0	0	0	0	0	0	0
ENSG00000232656	IDI2-AS1	IDI2 antisense RNA 1 (non-protein coding) [Source:HGNC Symbol;Acc:30885]	10	1068606	1090138	64.0841	13.2167	4.87527	0	0	24.0781	0	6.71092	40.2309	46.3817	0	15.4369	0	13.0842	18.2532	0	8.6253	12.978	10.7234
ENSG00000228678	RP11-255A11.13		9	33500946	33502751	2.84518	12.5705	2.98673	0	46.6712	0	0	0	10.0577	0	74.7286	31.0072	33.1104	1.2943	36.5063	0	17.2506	9.07294	0
ENSG00000229335	RP1-241P17.1		X	114957297	114959383	9.44297	4.24228	11.6014	13.2216	35.0034	12.0391	15.0811	7.33783	10.0577	0	37.3643	57.5133	8.43497	11.0912	18.2532	0	17.2506	4.40451	5.66369
ENSG00000246147	AL109616.1		21	26931716	26936957	25.1204	7.88541	8.79082	13.2216	0	12.0391	15.0811	21.3564	10.0577	18.5567	37.3643	4.23431	8.43497	18.0883	0	0	43.1265	21.4515	12.7964
ENSG00000255248	RP11-166D19.1		11	121899063	121987031	41.5799	28.3539	1.11809	13.2216	11.6678	12.0391	0	1.20329	0	9.27833	0	16.9372	16.8699	24.9131	54.7595	0	25.8759	18.0495	0
ENSG00000253518	CTD-2031P19.4		5	55240484	55240957	7.14326	22.4902	38.0964	52.8863	46.6712	12.0391	0	7.8774	10.0577	9.26836	0	0	7.80543	7.58346	18.2532	0	17.2506	13.456	3.01403
ENSG00000237914	RP11-77C3.3		20	1614154	1629118	12.8953	21.0671	33.9481	26.4431	0	0	0	8.51325	10.0577	0	0	16.8039	16.8699	14.353	0	27.2654	34.5012	30.8634	19.296
ENSG00000184441	AP001062.7		21	45751117	45755734	17.7573	14.1493	14.0374	26.4431	23.3356	0	15.0811	4.19111	10.0577	9.27833	37.3643	5.6013	8.43497	15.727	36.5063	0	8.6253	12.9437	12.4089
ENSG00000234456	AC004945.2		7	79082198	79100524	17.5626	29.3412	2.97911	0	23.3356	24.0781	0	6.38665	0	0	18.6822	11.2026	0	4.38443	73.0127	0	43.1265	12.6765	4.68989
ENSG00000214432	AC068831.1		15	91413148	91579841	30.8525	18.9964	4.92398	13.2216	23.3356	0	0	12.208	10.0577	0	74.7286	0	0	32.0409	0	0	0	34.4786	16.5885
ENSG00000246089	RP11-115C21.2		8	6261072	6264663	23.6511	6.4769	4.728	0	35.0034	12.0391	0	32.5799	0	0	18.6822	0	0	38.6916	54.7595	0	25.8759	2.55178	16.2524
ENSG00000253972	RP11-4K16.2		8	120227351	120259088	19.5887	1.11618	83.5402	13.2216	11.6678	12.0391	15.0811	7.19825	30.1732	0	18.6822	11.2026	0	11.2145	18.2532	0	8.6253	3.22735	5.93047
ENSG00000238005	RP11-443B7.1		1	235093089	235105809	37.33	15.8665	11.4665	0	11.6678	0	15.0811	8.89396	10.0577	9.26836	0	4.23431	0	23.5794	18.2532	0	0	26.5411	77.1212
ENSG00000247095	MIR210HG	MIR210 host gene (non-protein coding) [Source:HGNC Symbol;Acc:39524]	11	565660	568457	6.74845	0	6.69041	26.4431	11.6678	0	0	13.5148	30.1732	0	0	4.23431	8.43497	99.6423	18.2532	40.8981	0	0	0
ENSG00000226752	RP11-27I1.2		9	123605378	123616651	15.2554	3.32855	9.58214	13.2216	0	0	15.0811	14.4029	10.0577	18.5367	74.7286	4.23431	0	25.641	0	13.6327	17.2506	9.00647	21.7648
ENSG00000247912	AC107377.1		17	65871895	65881544	21.532	12.9627	10.8909	13.2216	11.6678	12.0391	0	22.1101	20.1155	0	18.6822	25.2725	0	23.6519	0	27.2654	0	38.2912	6.70951
ENSG00000251143	RP11-849H4.4		11	71725337	71731956	43.8749	3.45768	4.42077	39.6647	11.6678	0	0	17.6372	0	0	18.6822	9.83561	7.80543	24.9693	18.2532	13.6327	8.6253	27.5586	13.6381
ENSG00000233101	RP11-357H14.7		17	46627247	46683776	12.0376	13.1826	18.7386	26.4431	11.6678	0	0	17.7488	30.1732	0	18.6822	9.83561	16.8699	3.11451	18.2532	27.2654	8.6253	16.3338	13.602
ENSG00000248049	RP11-453E17.1		4	68566998	68946670	3.39065	5.09446	8.64708	0	11.6678	24.0781	45.2434	7.07263	20.1155	9.26836	0	4.23431	31.8513	6.45679	36.5063	0	17.2506	19.231	11.4214
ENSG00000225811	RP11-547I7.1		1	190234028	190331400	0	0	0	0	0	0	0	209.76	50.2887	0	0	0	0	1.10866	0	0	0	0	0
ENSG00000126749	EMG1	EMG1 nucleolar protein homolog (S. cerevisiae) [Source:HGNC Symbol;Acc:16912]	12	7079944	7095921	7.70667	15.8659	6.49939	13.2216	35.0034	0	45.2434	7.63775	10.0577	18.5467	18.6822	25.2725	0	3.42278	18.2532	0	8.6253	16.2675	8.82534
ENSG00000253948	RP11-410L14.2		8	100008991	100025272	7.68873	3.25423	3.60287	0	35.0034	12.0391	0	24.2677	40.2309	9.27833	0	5.6013	0	18.3666	73.0127	0	17.2506	7.66189	1.85891
ENSG00000238755	RP11-292E2.3		3	153102723	153105157	11.7895	29.838	4.25283	39.6647	0	0	0	17.5771	10.0577	0	56.0465	14.0699	7.80543	8.71457	0	0	17.2506	30.2096	10.6153
ENSG00000235387	RP11-327L3.1		9	35909480	35911683	9.85571	4.18765	9.34108	0	11.6678	24.0781	0	5.39617	20.1155	18.5367	37.3643	5.6013	0	8.60037	0	40.8981	8.6253	51.4903	1.00087
ENSG00000235257	AC093415.2		3	37795180	37903271	7.37624	9.98919	13.3381	26.4431	23.3356	0	0	21.2994	10.0577	9.27833	0	16.8039	7.80543	13.9295	0	40.8981	25.8759	22.0145	6.87322
ENSG00000253167	RP11-6D1.5		8	126052926	126057231	4.46318	0	0	0	0	0	0	0.301018	0	0	0	0	0	4.14328	0	245.389	0	0	0
ENSG00000227082	AL592494.5		1	121138614	121204983	27.3027	9.50505	4.68273	0	46.6712	12.0391	0	22.9681	30.1732	0	18.6822	18.3042	0	18.0071	18.2532	0	8.6253	8.3309	10.7151
ENSG00000250748	RP11-230G5.2		12	65860600	66036152	8.48161	33.5775	30.0169	13.2216	0	12.0391	15.0811	12.4685	0	18.5567	0	5.6013	16.8699	9.42366	0	0	17.2506	12.7131	48.0674
ENSG00000232192	RP11-62I21.1		1	245369746	245397803	14.1225	20.3249	11.0728	13.2216	0	0	0	9.57333	10.0577	0	0	0	0	0.986028	0	0	0	4.40451	169.427
ENSG00000232092	AC107204.1		3	87138430	87147851	18.0206	14.8476	6.55027	118.994	0	0	0	6.33712	0	18.5467	0	4.23431	15.6109	23.697	0	0	0	11.6912	13.928
ENSG00000226416	AC051649.7		11	2004467	2011150	2.18189	134.524	13.4094	0	11.6678	0	0	0.469706	0	0	0	0	0	3.6637	0	27.2654	8.6253	50.144	0
ENSG00000234070	RP11-415L24.1		1	217954540	217958462	9.19883	16.7519	0.763628	0	0	12.0391	0	5.08595	0	27.835	37.3643	9.83561	16.8699	5.91457	18.2532	0	77.6277	4.75403	8.82502
ENSG00000242641	RP11-735B13.1	similar to MUF1 protein (LOC440970), non-coding RNA [Source:RefSeq DNA;Acc:NR_033860]	3	84687557	84930830	13.6412	13.8771	10.4403	0	0	0	15.0811	19.1621	40.2309	0	18.6822	12.7029	7.80543	17.3617	36.5063	0	17.2506	8.70192	19.2951
ENSG00000233207	RP11-216M21.7		9	42363048	42367092	15.3304	12.4489	6.54204	0	23.3356	0	15.0811	16.7182	0	18.5467	0	9.83561	24.6754	8.52	36.5063	27.2654	25.8759	5.11011	4.94101
ENSG00000233818	AP000695.4		21	37818029	37904706	10.5668	12.5497	17.1098	0	0	0	15.0811	31.0467	30.1732	18.5467	0	18.3042	0	32.9247	18.2532	13.6327	8.6253	5.37072	17.3673
ENSG00000227920	RP1-153P14.5		6	37517780	37518636	12.7837	19.8774	23.5269	13.2216	23.3356	12.0391	0	3.89223	0	27.8051	18.6822	4.23431	0	25.856	0	40.8981	0	13.4775	9.7704
ENSG00000235954	TTC28-AS1	TTC28 antisense RNA 1 (non-protein coding) [Source:HGNC Symbol;Acc:29336]	22	28315364	28404569	19.0759	14.9111	30.2888	13.2216	11.6678	0	15.0811	7.66239	20.1155	9.26836	0	11.2026	0	20.3842	18.2532	13.6327	25.8759	5.12505	13.6087
ENSG00000249310	CTA-150C2.16		22	39387564	39394214	10.3719	5.64981	5.08514	13.2216	11.6678	0	0	24.0587	40.2309	9.27833	0	4.23431	0	16.0192	36.5063	54.5308	17.2506	0	0.988553
ENSG00000226159	RP11-478K7.2		10	91675246	91717130	20.3483	19.0373	12.1395	0	11.6678	0	0	27.3411	70.4041	9.26836	0	4.23431	0	10.5188	18.2532	0	8.6253	14.9036	21.2973
ENSG00000117242	PINK1-AS1	PINK1 antisense RNA 1 (non-protein coding) [Source:HGNC Symbol;Acc:38872]	1	20969150	20978686	10.5628	12.22	5.23067	92.551	0	12.0391	15.0811	6.21238	0	18.5467	37.3643	5.6013	0	12.9886	0	0	0	4.69515	14.8578
ENSG00000229847	EMX2OS	EMX2 opposite strand (non-protein coding) [Source:HGNC Symbol;Acc:18511]	10	119232726	119304579	7.30836	4.72454	2.93191	0	0	24.0781	0	10.7155	160.924	0	0	0	0	4.75365	18.2532	13.6327	0	0	0
ENSG00000232453	RP4-794H19.1		1	59348540	59362375	0	0	0	0	0	0	0	207.929	0	9.26836	0	0	7.80543	3.51162	18.2532	0	0	0	0
ENSG00000248261	CTD-2333K2.1		5	101479781	101482276	6.96684	61.0458	2.89369	0	58.339	0	0	2.20564	0	0	37.3643	0	0	0.9764	0	0	17.2506	57.4939	0.972072
ENSG00000237517	DGCR5	DiGeorge syndrome critical region gene 5 (non-protein coding) [Source:HGNC Symbol;Acc:16757]	22	18958027	19018742	39.2495	11.2828	10.0584	13.2216	0	12.0391	0	14.0396	10.0577	0	0	5.6013	8.43497	25.5395	18.2532	0	34.5012	36.6158	4.8272
ENSG00000188206	NCRNA00201	non-protein coding RNA 201 [Source:HGNC Symbol;Acc:27651]	1	245003940	245018799	17.1461	26.2771	9.91694	0	35.0034	12.0391	0	6.84517	10.0577	0	0	16.9372	8.43497	27.9106	18.2532	0	25.8759	16.9954	10.8579
ENSG00000204054	RP11-492E3.1		9	132245730	132275947	11.1504	17.3819	1.92321	0	46.6712	0	15.0811	22.7389	0	0	37.3643	19.6712	16.8699	8.62331	0	0	0	15.221	28.2062
ENSG00000234948	RP4-723E3.1		20	50827184	51266970	7.16478	3.68309	5.43467	52.8863	0	12.0391	0	2.43349	0	0	0	0	126.525	5.93718	18.2532	0	0	0	5.7326
ENSG00000246813	AC012366.1		2	73181268	73193366	3.95055	29.4212	4.13449	13.2216	11.6678	24.0781	0	1.69833	0	27.835	18.6822	15.4369	0	13.9241	18.2532	0	25.8759	13.812	17.6559
ENSG00000248115	RP11-752D24.2		4	53811816	53824254	4.29808	10.5593	14.2543	0	23.3356	36.1172	15.0811	12.0592	10.0577	0	18.6822	25.2725	8.43497	9.40152	18.2532	13.6327	17.2506	0	2.91622
ENSG00000251446	RP11-375B1.2		5	176153943	176166459	30.8759	0	1.60943	0	0	0	0	0	10.0577	9.26836	18.6822	0	0	150.004	18.2532	0	0	0	0
ENSG00000243497	RP13-503K1.4		3	93795186	93800665	4.49602	29.9372	16.0774	26.4431	23.3356	12.0391	15.0811	22.0253	0	0	0	4.23431	24.6754	11.1293	0	13.6327	8.6253	10.2501	16.5392
ENSG00000248311	CTD-2161F6.2		5	4775589	4805882	11.1215	3.2092	14.5552	0	11.6678	0	0	9.64101	20.1155	92.7135	0	5.6013	0	30.7448	0	27.2654	0	11.1864	0
ENSG00000256276	RP5-916L7.2		12	126468248	126470780	16.5378	13.0366	6.1847	13.2216	0	12.0391	0	11.6421	10.0577	9.26836	74.7286	19.6712	0	12.4072	0	27.2654	0	8.76839	2.98545
ENSG00000246363	RP11-13A1.1		12	89404458	89413456	18.5233	3.73136	3.03181	0	0	12.0391	0	25.7293	10.0577	9.26836	37.3643	22.5385	8.43497	15.5324	36.5063	13.6327	17.2506	2.14337	1.98942
ENSG00000170846	AC093323.3		4	6675178	6677774	25.598	6.69901	7.70019	13.2216	11.6678	36.1172	0	9.83729	30.1732	9.26836	18.6822	0	7.80543	7.18584	18.2532	13.6327	0	16.0559	5.85052
ENSG00000246763	CTC-463N11.3		5	98105322	98109173	0	3.46005	0	0	0	0	0	16.9851	211.212	0	0	0	0	5.40289	0	0	0	0	0
ENSG00000245526	CTC-547D20.1	microRNA 9-2 (MIR9-2), microRNA [Source:RefSeq DNA;Acc:NR_030741]	5	87803363	87986858	55.3588	5.82361	7.17238	13.2216	0	0	15.0811	4.53767	10.0577	18.5467	0	12.7029	0	25.4304	18.2532	0	17.2506	25.4122	7.84575
ENSG00000253279	RP11-94H18.3		8	29779029	29811240	12.2728	12.5463	27.2606	0	11.6678	12.0391	0	12.6172	10.0577	0	0	0	0	9.1833	18.2532	13.6327	86.253	7.63186	3.00171
ENSG00000235618	RP11-324H6.5		10	51780942	51827563	15.8288	5.9824	11.0977	0	11.6678	24.0781	0	8.82039	10.0577	9.27833	0	15.4369	8.43497	20.6717	18.2532	27.2654	34.5012	11.9808	2.99029
ENSG00000251249	RP11-73G16.1		4	152877143	152890533	3.30786	23.1057	1.1018	0	11.6678	24.0781	0	1.48007	10.0577	18.5567	37.3643	22.5385	7.80543	4.29077	18.2532	0	43.1265	9.3903	0
ENSG00000178947	NCRNA00086	non-protein coding RNA 86 [Source:HGNC Symbol;Acc:34499]	X	134555868	134559682	40.8647	6.43331	19.8497	0	11.6678	0	15.0811	3.90674	10.0577	9.27833	37.3643	28.1398	16.2404	8.73235	18.2532	0	0	7.26843	2.98455
ENSG00000222035	AC079354.3		2	202978349	202981781	20.8263	5.67676	8.50397	39.6647	11.6678	0	0	19.4803	0	0	37.3643	4.23431	0	28.8174	18.2532	13.6327	8.6253	11.2014	7.91893
ENSG00000223546	LL0XNC01-157D4.1		X	102024089	102140334	22.2944	33.4043	1.496	0	11.6678	0	15.0811	4.88658	0	0	18.6822	0	0	12.9054	0	0	8.6253	2.14337	104.034
ENSG00000121446	RGSL1	regulator of G-protein signaling like 1 [Source:HGNC Symbol;Acc:18636]	1	182419256	182529734	5.52837	10.2857	51.1255	0	0	12.0391	0	6.68424	10.0577	18.5467	18.6822	21.0382	0	9.96755	0	0	34.5012	6.45469	28.8925
ENSG00000255733	GS1-410F4.2		12	68383225	68628466	11.7755	10.139	8.49997	0	0	0	0	7.67952	10.0577	0	74.7286	14.0699	0	0.9764	18.2532	0	34.5012	13.9126	27.675
ENSG00000236370	RP11-574K11.16		10	75556276	75561157	3.30786	0	4.63625	13.2216	0	0	0	181.584	10.0577	0	0	0	8.43497	2.84031	0	0	0	2.55178	4.95508
ENSG00000255446	CTD-2531D15.4		11	62189317	62194196	1.76867	0.996159	0	13.2216	0	0	0	211.359	0	0	0	0	0	0.986028	0	0	0	0	0.98371
ENSG00000248222	CTB-174D11.1		5	168440232	168465003	3.78546	5.93001	7.85762	0	23.3356	24.0781	0	2.06631	10.0577	27.815	18.6822	5.6013	15.6109	7.71158	18.2532	13.6327	34.5012	4.28675	5.83652
ENSG00000205351	AC002347.2		17	10698230	10707354	0	2.47597	0	0	0	12.0391	0	16.2302	0	0	0	0	0	0.964311	0	190.858	0	5.84559	0
ENSG00000236901	NCRNA00287	non-protein coding RNA 287 [Source:HGNC Symbol;Acc:23642]	9	125871773	125877756	23.8808	1.03511	21.6833	39.6647	11.6678	0	15.0811	31.9159	20.1155	0	18.6822	0	0	26.5837	0	0	8.6253	6.1352	2.949
ENSG00000223745	RP4-717I23.3		1	93727743	93811582	12.1055	9.38569	5.52773	39.6647	11.6678	0	0	11.7944	20.1155	0	37.3643	14.0699	0	8.69568	36.5063	0	8.6253	5.37072	6.79001
ENSG00000230294	RP13-507P19.2		12	131832015	131852100	7.69582	19.241	10.4336	13.2216	0	0	15.0811	2.08127	40.2309	27.815	37.3643	8.46862	7.80543	1.94071	18.2532	0	8.6253	8.02635	1.00087
ENSG00000230552	AC092162.1		2	177588996	177684038	3.23998	6.3008	6.42056	26.4431	35.0034	24.0781	15.0811	3.10487	10.0577	0	0	5.6013	8.43497	8.10748	54.7595	0	8.6253	6.45469	4.80926
ENSG00000250891	CTD-2281M20.1		5	117803851	117897812	13.9534	16.4213	9.02722	13.2216	70.0068	0	30.1623	8.60296	20.1155	0	0	9.83561	7.80543	8.71343	0	0	8.6253	8.02635	1.98436
ENSG00000228671	RP11-109A6.4		10	131581117	131584811	8.5775	5.2239	5.17007	26.4431	128.346	0	0	7.28085	10.0577	0	18.6822	0	0	13.6244	0	0	0	0	2.82591
ENSG00000205488	RP11-116G8.4		10	5556207	5568209	11.1595	12.9193	17.7305	13.2216	0	0	0	2.94749	0	27.815	0	23.9055	15.6109	14.7779	0	13.6327	43.1265	23.4846	5.83404
ENSG00000254968	RP11-65M17.3		11	112263841	112492452	14.7671	36.3482	1.11001	0	35.0034	12.0391	0	2.31252	0	0	56.0465	5.6013	0	0.789322	0	0	17.2506	2.90786	39.1141
ENSG00000224597	RP11-534G20.3	patched domain containing 3 pseudogene (LOC387647), non-coding RNA [Source:RefSeq DNA;Acc:NR_003930]	10	29698331	29776674	11.9369	9.98895	3.6788	0	0	24.0781	0	2.1721	10.0577	18.5567	0	15.4369	24.0458	19.7219	18.2532	0	60.3771	2.55178	1.93671
ENSG00000206567	AC022007.5		3	10048102	10052893	3.30786	1.41485	0.87117	0	11.6678	0	0	27.2202	100.577	9.27833	37.3643	0	7.80543	0	0	0	17.2506	5.83065	0
ENSG00000231764	DLX6-AS1	DLX6 antisense RNA 1 (non-protein coding) [Source:HGNC Symbol;Acc:37151]	7	96594839	96643377	35.6545	10.3019	9.27757	26.4431	0	0	0	13.8861	30.1732	0	0	11.2026	8.43497	8.97016	18.2532	13.6327	0	28.7544	6.95469
ENSG00000253718	RP11-281O15.3		5	178107232	178366360	31.4108	8.3109	8.26602	13.2216	23.3356	0	0	12.512	10.0577	9.27833	37.3643	15.4369	0	11.4332	0	13.6327	8.6253	5.05123	13.579
ENSG00000249715	AC068539.1		2	97308474	97370622	10.0852	10.8478	29.0978	0	46.6712	0	0	14.3199	0	18.5367	0	9.83561	8.43497	17.832	18.2532	0	17.2506	10.1697	9.78628
ENSG00000231663	RP5-827C21.4		1	234508553	234509339	4.99422	6.50122	1.67945	13.2216	0	12.0391	0	19.3967	40.2309	9.27833	0	4.23431	16.2404	39.6356	0	13.6327	17.2506	10.2286	10.6335
ENSG00000234229	RP11-308N19.4		9	109378339	109464943	18.6482	13.4378	6.02571	39.6647	11.6678	0	0	8.73212	0	0	18.6822	0	24.0458	8.55983	0	13.6327	8.6253	21.6084	25.4982
ENSG00000233705	AC078937.4		7	107297075	107302596	15.6216	2.31651	0	0	0	0	0	0	0	0	0	0	0	1.2943	18.2532	0	181.131	0	0
ENSG00000232225	RP11-143O10.1		13	89867101	89889144	17.2592	4.17657	3.31598	13.2216	11.6678	0	0	8.08579	10.0577	27.825	37.3643	0	15.6109	7.84697	18.2532	0	0	17.3665	25.9579
ENSG00000248109	CTC-295J13.3		5	147618133	147622157	0.545472	20.7284	14.3101	0	11.6678	0	0	9.48136	0	55.6301	0	21.0382	0	6.34192	0	27.2654	25.8759	9.68204	13.7341
ENSG00000224660	AC087590.3		3	15295691	15306000	22.621	6.63625	6.49395	0	11.6678	0	0	6.4237	0	0	18.6822	8.46862	0	22.0193	36.5063	13.6327	17.2506	35.1308	10.7333
ENSG00000197041	AC078819.1		12	104424522	104426026	6.42846	9.45436	24.458	39.6647	0	0	0	1.28056	10.0577	0	0	11.2026	0	97.696	0	0	0	10.1025	5.87219
ENSG00000235366	RP11-154C3.2		13	46255225	46256554	12.6829	23.7455	13.0861	13.2216	35.0034	12.0391	15.0811	1.96649	0	18.5467	0	16.8039	0	38.8635	0	0	8.6253	4.34563	1.98458
ENSG00000249498	AC005586.2		7	150004701	150010334	42.8952	8.09561	2.53658	0	11.6678	12.0391	0	8.02705	10.0577	0	18.6822	39.3424	8.43497	22.7699	0	27.2654	0	2.20226	0.98371
ENSG00000240137	RP11-103G8.2		3	150421351	150437933	7.68873	2.69018	1.99542	0	23.3356	0	15.0811	80.7482	0	0	0	0	15.6109	0.789322	18.2532	0	43.1265	0	4.85713
ENSG00000225632	RP5-997D24.3		1	54751078	54753044	0.545472	15.3854	4.53618	0	0	36.1172	0	3.0562	0	111.33	18.6822	0	0	14.747	0	0	0	5.77912	3.78673
ENSG00000248786	AC000079.1		22	19402955	19409368	31.1416	6.98087	10.8244	0	11.6678	24.0781	0	13.167	0	9.27833	18.6822	14.0699	0	13.7609	18.2532	13.6327	0	13.827	14.5667
ENSG00000245622	AC110079.2		4	119585252	119605621	14.0047	17.4895	3.1401	13.2216	23.3356	12.0391	0	10.7198	0	0	37.3643	5.6013	0	22.9944	0	0	8.6253	40.0944	5.00222
ENSG00000245773	AL121928.1		10	104209595	104216051	9.85352	1.87477	9.54317	13.2216	0	12.0391	0	14.4184	10.0577	0	0	0	24.6754	14.8811	18.2532	27.2654	34.5012	2.55178	19.1915
ENSG00000253716	RP13-582O9.5		8	144362331	144363860	2.84518	6.16576	3.00484	0	23.3356	0	15.0811	17.4082	20.1155	9.26836	0	0	47.4621	16.2318	36.5063	0	8.6253	2.14337	3.92382
ENSG00000180769	NCRNA00247	non-protein coding RNA 247 [Source:HGNC Symbol;Acc:21603]	4	85887538	85932430	9.92359	11.8722	8.19141	26.4431	11.6678	0	0	10.7867	0	9.26836	56.0465	0	7.80543	13.7286	18.2532	0	8.6253	11.6514	5.88676
ENSG00000249567	MIMT1	MER1 repeat containing imprinted transcript 1 (non-protein coding) [Source:HGNC Symbol;Acc:33464]	19	57352270	57359922	1.09094	7.13685	16.8225	13.2216	58.339	0	15.0811	10.2237	10.0577	9.26836	0	18.3042	8.43497	17.5375	0	0	17.2506	4.34563	2.9327
ENSG00000219481	NBPF1	neuroblastoma breakpoint family, member 1 [Source:HGNC Symbol;Acc:26088]	1	16888818	16940083	21.4027	9.09481	12.7464	0	0	0	0	14.5348	40.2309	0	0	4.23431	8.43497	8.59776	18.2532	0	25.8759	6.15014	40.2704
ENSG00000230544	RP11-199F6.7		13	114586640	114588308	0	15.1268	1.60943	0	0	0	0	14.8358	10.0577	0	18.6822	56.2797	7.80543	1.67614	18.2532	13.6327	25.8759	24.7579	0.98371
ENSG00000227608	DCUN1D2-AS1	DCUN1D2 antisense RNA 1 (non-protein coding) [Source:HGNC Symbol;Acc:39888]	13	114110944	114116670	16.5751	8.26687	2.74153	0	0	0	0	2.53601	0	0	0	68.9826	0	18.202	36.5063	40.8981	0	14.2386	0
ENSG00000226869	RP11-203P23.1		7	104379044	104444554	17.3529	16.196	12.4625	0	0	0	0	1.85707	10.0577	9.27833	18.6822	8.46862	7.80543	11.7571	54.7595	0	17.2506	7.61795	12.8061
ENSG00000247092	SNHG10	small nucleolar RNA host gene 10 (non-protein coding) [Source:HGNC Symbol;Acc:27510]	14	95999256	96001209	6.99969	13.7064	10.6209	13.2216	0	12.0391	0	28.1574	30.1732	9.27833	0	8.46862	39.6567	14.5332	0	0	8.6253	5.12505	5.55517
ENSG00000248275	CTC-338M12.3		5	180688213	180699308	20.2116	0.934085	2.25413	0	11.6678	12.0391	0	9.23513	10.0577	55.6301	18.6822	4.23431	7.80543	9.65967	0	0	34.5012	2.14337	3.92129
ENSG00000239513	RP11-2A4.3		3	137490791	137499720	8.25214	5.15371	8.03009	0	46.6712	12.0391	0	4.79609	0	9.26836	18.6822	22.5385	16.2404	9.63521	18.2532	0	8.6253	3.22735	10.6089
ENSG00000230651	AC096655.2		2	108439519	108443285	0.545472	67.6243	0	118.994	0	0	0	5.64029	0	0	0	0	0	0	0	0	8.6253	0	0
ENSG00000228340	RP5-1043L13.1		20	58662895	59102516	18.0351	2.16541	0.885275	39.6647	23.3356	0	15.0811	2.76413	40.2309	9.26836	0	0	8.43497	9.21115	18.2532	0	8.6253	4.28675	0
ENSG00000245149	RP11-383J24.5		8	125474726	125486817	15.2095	22.0236	12.6074	0	0	0	0	12.8661	10.0577	9.27833	0	14.0699	31.8513	34.9895	0	0	17.2506	12.7281	6.75469
ENSG00000236648	RP11-473A10.2		1	18044182	18076473	9.92008	0	93.6263	0	0	0	0	4.88004	20.1155	0	0	0	16.8699	21.5605	0	27.2654	0	3.22735	1.93671
ENSG00000251370	CTD-2201E9.1		5	9511445	9518198	0.545472	10.6094	7.4011	0	0	12.0391	105.568	2.15936	10.0577	9.26836	0	8.46862	15.6109	6.8561	0	0	0	5.11011	4.85568
ENSG00000227764	RP11-354K1.1		1	211813037	211827923	4.94428	0	0	0	0	0	0	176.553	0	0	0	0	0	0	0	13.6327	0	0	1.92782
ENSG00000248329	RP11-366M4.3		4	165798156	165820117	0.545472	1.11618	158.123	0	0	0	0	4.19548	10.0577	0	0	5.6013	0	5.35839	0	0	8.6253	0	2.83823
ENSG00000227544	AC018647.3		7	35756055	35774497	20.1044	0.902423	1.70898	0	0	12.0391	0	4.83076	0	0	0	0	0	26.1629	127.772	0	0	2.55178	0
ENSG00000255159	RP11-318C2.1		11	8790325	8831778	15.5734	1.88387	3.43952	0	23.3356	12.0391	0	18.3676	0	0	56.0465	4.23431	7.80543	24.4989	0	0	8.6253	8.63238	10.7139
ENSG00000246889	AP000487.5		11	70218352	70244594	10.4161	13.3027	1.66121	13.2216	23.3356	0	15.0811	12.2328	0	9.27833	18.6822	15.4369	7.80543	9.0514	0	13.6327	8.6253	6.1352	17.1803
ENSG00000214381	C3orf66	chromosome 3 open reading frame 66 [Source:HGNC Symbol;Acc:32675]	3	108897012	108904104	9.33224	14.5216	8.72368	26.4431	0	0	0	10.0678	20.1155	9.27833	0	18.3042	23.4163	15.8621	0	13.6327	8.6253	8.70192	5.69008
ENSG00000245556	CTD-2037K23.2		5	77638189	77656331	26.0531	10.0448	13.0175	26.4431	0	0	0	4.76617	10.0577	18.5467	18.6822	8.46862	7.80543	11.13	0	0	8.6253	15.1783	13.4399
ENSG00000177738	CTD-2201E18.3		5	43014516	43067521	4.99422	5.37224	4.17974	0	0	12.0391	45.2434	2.49892	30.1732	0	0	28.1398	15.6109	8.27242	0	0	0	34.7056	1.00087
ENSG00000233552	AL139035.1		13	100139216	100149026	12.2125	6.37837	3.34437	13.2216	11.6678	0	0	4.01254	0	0	18.6822	14.0699	0	71.9834	0	0	17.2506	11.6912	6.73313
ENSG00000226472	RP11-551L14.4		12	31149973	31158938	3.40508	1.11618	2.51614	0	46.6712	0	0	19.6104	10.0577	0	0	5.6013	7.80543	4.30208	36.5063	27.2654	8.6253	2.55178	15.2119
ENSG00000253734	RP11-579E24.1		8	64681988	64698058	14.9101	7.21872	3.33495	26.4431	0	0	0	10.1797	10.0577	9.26836	18.6822	9.83561	7.80543	13.8672	18.2532	13.6327	0	21.6511	5.84911
ENSG00000250920	RP11-297P16.4		4	104472084	104480284	13.2592	19.9455	1.31009	0	23.3356	0	0	0.31496	0	18.5467	0	0	15.6109	0.964311	18.2532	0	43.1265	7.60301	28.0759
ENSG00000255389	TRAF3IP2-AS2	TRAF3IP2 antisense RNA 2 (non-protein coding) [Source:HGNC Symbol;Acc:1342]	6	111921078	111923498	6.66348	13.7208	6.95141	13.2216	11.6678	0	0	4.80251	0	9.26836	37.3643	5.6013	7.80543	9.00582	0	0	8.6253	13.0551	40.7231
ENSG00000248371	CTC-347C20.2		5	71869947	71956496	7.99006	13.2881	14.2234	39.6647	0	36.1172	15.0811	7.02456	0	9.26836	0	0	15.6109	3.73436	0	0	8.6253	16.6684	0.972072
ENSG00000225470	JPX	JPX transcript, XIST activator (non-protein coding) [Source:HGNC Symbol;Acc:37191]	X	73164177	73220326	10.6985	6.39401	3.84431	0	0	12.0391	0	11.0867	10.0577	0	37.3643	5.6013	7.80543	7.78128	0	40.8981	17.2506	0	17.4442
ENSG00000246100	CTC-774J1.2		11	115624966	115631345	7.70316	2.03127	4.20184	0	0	0	0	5.632	0	0	0	11.2026	0	8.38937	0	13.6327	8.6253	6.95629	119.033
ENSG00000245382	AC091588.1		18	19746859	19748929	0	2.34818	0.740304	0	0	24.0781	0	1.65998	0	0	0	5.6013	0	0	0	149.96	0	2.55178	0
ENSG00000231607	DLEU2	deleted in lymphocytic leukemia 2 (non-protein coding) [Source:HGNC Symbol;Acc:13748]	13	50601269	50699856	7.70667	2.0186	7.55833	0	23.3356	0	0	4.74613	0	0	18.6822	0	7.80543	2.73966	0	0	34.5012	2.55178	74.7983
ENSG00000226629	AC019349.2		17	39705858	39710747	5.51394	14.7642	3.49822	0	23.3356	24.0781	30.1623	11.1393	20.1155	0	0	8.46862	8.43497	2.83978	18.2532	0	8.6253	3.22735	3.82678
ENSG00000255036	RP11-23J9.4	LOC100499484-C9orf174 readthrough (BDAG1), transcript variant 2, non-coding RNA [Source:RefSeq DNA;Acc:NR_036527]	9	100000779	100139569	29.3726	6.74713	8.61779	0	0	12.0391	15.0811	9.15712	10.0577	9.26836	18.6822	18.3042	0	13.0004	18.2532	0	8.6253	5.12505	3.92613
ENSG00000255455	RP11-890B15.3		11	130732054	130737889	12.8512	4.04547	6.62141	13.2216	46.6712	0	0	11.3285	0	0	0	5.6013	16.8699	25.679	36.5063	0	0	2.20226	3.96169
ENSG00000230417	RP11-90J7.3		10	80008497	80434724	4.61384	3.96151	1.50243	0	0	0	0	2.13118	0	139.095	18.6822	0	0	8.49843	0	0	0	0	6.80482
ENSG00000253825	RP11-96A1.5		4	120956188	120961770	0	0.996159	0.404962	0	11.6678	0	150.811	1.95778	0	0	0	0	7.80543	0.9764	0	0	8.6253	0	1.97226
ENSG00000254162	RP11-48B3.3		8	81447241	81451370	14.1593	7.68327	30.1466	13.2216	0	0	0	9.48059	50.2887	0	0	0	0	12.5949	18.2532	0	8.6253	14.5027	5.78763
ENSG00000257084	U47924.27		12	7072409	7073610	0	1.24827	0.416605	26.4431	0	0	0	56.0759	0	0	0	22.5385	24.6754	0	0	27.2654	25.8759	0	0
ENSG00000229645	C14orf139	chromosome 14 open reading frame 139 [Source:HGNC Symbol;Acc:20353]	14	95873606	95876427	14.0087	14.0478	2.71815	0	11.6678	12.0391	0	8.71305	10.0577	0	0	21.1715	16.2404	10.5441	18.2532	0	0	25.5482	19.2711
ENSG00000250954	RP11-79E3.3		4	33777969	34041515	8.34936	7.16349	5.39972	39.6647	0	0	0	7.02775	0	0	0	14.0699	0	17.092	54.7595	0	17.2506	7.24693	5.91432
ENSG00000254304	RP11-1049H7.1		8	2104674	2142690	9.85352	16.8609	58.6248	26.4431	0	12.0391	0	3.59608	0	0	0	14.0699	8.43497	2.86229	0	13.6327	8.6253	6.83852	1.92782
ENSG00000250790	RP11-46H11.3		12	133488056	133491318	13.1913	11.812	5.98658	66.1078	11.6678	0	0	10.9235	10.0577	0	0	0	8.43497	18.7326	0	0	8.6253	10.9491	6.86923
ENSG00000229891	Z83851.1		22	42760406	42765242	6.25026	10.0635	13.3935	0	0	0	0	27.4549	40.2309	0	0	5.6013	0	5.32076	18.2532	0	43.1265	8.65695	4.93719
ENSG00000228609	RP3-341D10.4		X	100258821	100262962	11.351	5.91745	3.43569	0	11.6678	0	15.0811	20.1264	10.0577	9.27833	37.3643	9.83561	0	10.3127	18.2532	0	0	9.07294	10.4975
ENSG00000254092	RP11-369E15.3		8	20810156	20831388	0	1.2277	0.428473	0	0	12.0391	0	0	100.577	9.27833	0	0	0	0	0	54.5308	0	2.90786	0
ENSG00000255145	RP11-60I3.5		9	102648608	102668883	0	0	0.856946	0	0	0	105.568	2.03637	0	9.26836	37.3643	0	0	0	0	0	25.8759	0	0
ENSG00000215190	GUSBP4	glucuronidase, beta pseudogene 4 [Source:HGNC Symbol;Acc:18220]	6	58272352	58287779	4.46318	2.34387	6.13716	0	11.6678	12.0391	0	5.10006	30.1732	18.5367	37.3643	18.3042	8.43497	6.45716	0	13.6327	0	5.83065	0
ENSG00000175611	C9orf130	chromosome 9 open reading frame 130 [Source:HGNC Symbol;Acc:27858]	9	98520892	98638259	3.78546	7.47446	7.41524	0	11.6678	0	0	19.6277	30.1732	9.26836	0	0	16.2404	6.48661	18.2532	0	25.8759	3.22735	20.9266
ENSG00000225884	AC098872.3		2	192658151	192684976	6.00019	8.63925	7.72342	13.2216	0	36.1172	0	10.408	30.1732	0	18.6822	4.23431	0	3.82634	0	0	17.2506	11.2453	12.8695
ENSG00000254718	CTD-2184C24.2		14	60706839	60715483	12.8039	4.45186	1.45299	0	11.6678	0	0	10.364	110.635	0	0	4.23431	0	3.97095	0	0	8.6253	5.83065	5.64766
ENSG00000250546	RP11-8L2.1		4	84717589	85214565	14.9642	2.15069	6.57389	13.2216	11.6678	12.0391	0	16.7237	40.2309	0	0	29.5068	8.43497	17.1473	0	0	0	5.11011	1.00087
ENSG00000234771	RP11-395P17.3		9	130873450	130881013	16.5285	2.34818	3.50931	13.2216	0	0	0	14.221	0	9.26836	0	0	0	27.0094	36.5063	27.2654	8.6253	0	19.1826
ENSG00000230366	DSCR9	Down syndrome critical region gene 9 (non-protein coding) [Source:HGNC Symbol;Acc:16301]	21	38580804	38594041	31.4811	6.41226	1.01304	0	0	24.0781	0	8.29156	20.1155	27.835	37.3643	5.6013	0	10.2238	0	0	0	0	4.99839
ENSG00000175699	C14orf48	chromosome 14 open reading frame 48 [Source:HGNC Symbol;Acc:19860]	14	94463616	94478040	1.09094	0	2.76787	0	0	0	165.893	1.18365	0	0	0	4.23431	0	1.77535	0	0	0	0	0
ENSG00000225210	AL589743.1		14	19650018	19718563	5.17375	13.8093	2.63055	13.2216	11.6678	0	0	2.95147	0	9.26836	37.3643	4.23431	7.80543	2.72491	0	13.6327	8.6253	33.5473	9.67083
ENSG00000203585	RP11-542B15.1		12	67913609	67960906	3.30786	7.78749	2.27243	0	0	12.0391	15.0811	12.812	10.0577	9.26836	0	0	16.2404	12.0108	18.2532	0	17.2506	32.0596	7.83026
ENSG00000244491	RP3-508I15.18		22	39130730	39134770	11.0681	9.72314	5.23642	13.2216	0	0	30.1623	2.98139	20.1155	9.27833	0	0	16.2404	14.4911	18.2532	0	8.6253	2.90786	13.7969
ENSG00000250005	RP11-43D2.3		5	124052884	124053638	3.30786	4.79834	0.450786	0	46.6712	0	0	3.33561	90.5196	9.27833	0	0	0	17.4033	0	0	0	0	0
ENSG00000253288	RP11-238K6.1		8	138821687	139095813	33.6983	15.0947	9.14405	13.2216	0	24.0781	0	10.0286	30.1732	9.27833	0	0	0	6.78714	0	0	0	6.95629	16.342
ENSG00000235576	AC092580.4		2	7865932	7870836	0	4.48269	0.329139	0	11.6678	0	15.0811	2.8678	10.0577	0	18.6822	0	8.43497	0	36.5063	27.2654	17.2506	5.06617	16.2224
ENSG00000232284	RP11-518D3.1		1	68297986	68668670	6.54785	11.6642	16.3024	13.2216	11.6678	0	15.0811	4.14687	50.2887	9.27833	0	11.2026	0	7.01226	0	0	8.6253	2.9228	5.76602
ENSG00000233104	RP11-432J9.4		10	72577323	72577968	4.36377	10.2752	22.8398	13.2216	23.3356	0	15.0811	2.7171	0	0	18.6822	4.23431	15.6109	4.23118	18.2532	0	17.2506	2.14337	1.01229
ENSG00000204380	AC005042.4		2	159514849	159591514	4.39881	7.90456	5.5264	0	0	0	15.0811	5.77195	20.1155	0	56.0465	0	8.43497	7.99475	0	27.2654	8.6253	5.06617	0.98371
ENSG00000236115	RP11-62C3.6		9	94967638	94972440	14.6256	22.7348	1.16878	13.2216	0	0	0	3.73596	0	9.27833	37.3643	15.4369	0	3.03728	0	0	34.5012	4.28675	11.703
ENSG00000229976	RP5-1031J8.1		20	38414363	38441871	15.4484	3.73658	2.86851	0	23.3356	0	15.0811	2.6693	70.4041	0	0	15.4369	0	14.9475	0	0	0	5.10355	1.98819
ENSG00000247397	AC068587.3		8	12394588	12523137	12.5465	10.2172	19.6005	26.4431	11.6678	0	0	4.96108	0	0	0	4.23431	0	47.7635	0	0	0	21.8159	10.8061
ENSG00000256910	AL034397.1	microRNA 223 (MIR223), microRNA [Source:RefSeq DNA;Acc:NR_029637]	X	65235303	65240264	1.63641	8.80426	5.73316	0	0	0	0	4.42249	20.1155	0	18.6822	0	8.43497	0	0	0	0	2.20226	99.9889
ENSG00000203605	RP11-335E6.2		1	63604921	63628824	14.6058	8.42996	2.77287	39.6647	0	0	0	2.39552	10.0577	0	37.3643	9.83561	0	15.596	0	0	0	13.115	15.7538
ENSG00000233587	AC096570.1		2	22759351	22761160	1.63641	10.5986	30.1828	0	0	0	0	8.50692	0	0	37.3643	25.2725	16.8699	4.1416	0	0	8.6253	16.4452	8.83604
ENSG00000246451	AL049840.2		14	104146166	104150352	14.7128	19.6367	5.98772	0	0	0	0	3.08859	10.0577	64.9084	18.6822	9.83561	8.43497	6.77582	0	0	0	2.20226	3.91601
ENSG00000225376	RP11-490D19.6		9	104230721	104243784	3.93612	12.074	25.8429	13.2216	11.6678	0	15.0811	9.09041	10.0577	9.26836	0	8.46862	0	9.52783	0	0	8.6253	15.5031	15.634
ENSG00000213279	RP1-29C18.9		22	49965912	49969074	6.05941	20.0222	9.83168	13.2216	11.6678	12.0391	15.0811	5.98597	0	18.5367	0	9.83561	0	6.08231	0	0	8.6253	15.2574	15.3824
ENSG00000247687	AC006504.2		19	28281402	28284848	1.09094	9.05901	8.97834	13.2216	46.6712	12.0391	0	13.3461	20.1155	0	0	0	8.43497	5.44798	0	13.6327	0	10.4808	4.89578
ENSG00000251218	RP11-1057B8.2		8	135862178	135894142	3.93612	5.24292	11.6665	13.2216	23.3356	0	0	12.5898	10.0577	9.26836	0	14.0699	0	11.2338	0	13.6327	17.2506	10.9706	10.6545
ENSG00000228862	RP11-91I20.3		8	61544068	61548830	7.22557	7.06465	15.8281	0	11.6678	0	0	5.2621	0	0	56.0465	9.83561	15.6109	14.9868	0	0	0	5.37072	17.8313
ENSG00000254934	RP11-587D21.5		11	27639173	27656174	3.30786	2.77158	143.662	13.2216	0	0	0	0.520463	0	0	0	0	0	0	0	0	0	2.90786	0
ENSG00000227143	RP11-159H3.2		10	122938214	122945480	0	2.28279	12.2327	66.1078	11.6678	0	30.1623	13.1944	0	0	0	15.4369	7.80543	1.86338	0	0	0	2.55178	1.95578
ENSG00000241472	RP11-204J18.3		3	62247498	62355005	4.99422	12.7737	13.3416	0	0	12.0391	0	5.95304	0	0	0	18.3042	8.43497	11.8587	0	13.6327	17.2506	7.19461	39.4552
ENSG00000253143	RP11-333A23.3		8	71383347	71392858	9.92359	4.60511	2.86045	39.6647	0	0	0	7.41138	0	0	37.3643	0	16.2404	5.26786	0	13.6327	8.6253	5.83065	13.7266
ENSG00000203999	RP11-290F20.1		20	48909257	48931459	8.60325	2.27149	3.50437	26.4431	11.6678	0	0	30.0642	0	0	37.3643	12.7029	15.6109	3.91592	0	0	0	5.4296	6.99198
ENSG00000205424	AL592528.1		21	47247875	47256333	4.49602	18.3458	7.28707	13.2216	35.0034	0	0	5.04973	0	0	0	14.0699	15.6109	6.20999	0	13.6327	0	25.6793	5.75624
ENSG00000229228	RP11-17H4.2	hCG2045266-like (LOC100287814), non-coding RNA [Source:RefSeq DNA;Acc:NR_034037]	1	231727038	231747836	0.545472	66.2251	1.25882	0	11.6678	24.0781	0	8.93059	10.0577	0	0	5.6013	0	1.86338	18.2532	0	0	15.3107	0
ENSG00000231374	AC012314.6		19	54617086	54617594	3.23998	6.97112	2.43848	0	11.6678	0	0	7.20085	0	0	18.6822	15.4369	8.43497	3.23714	0	54.5308	17.2506	14.1532	0
ENSG00000255328	RP11-326C3.12		11	327171	330122	13.8983	2.16304	1.95587	0	11.6678	0	0	15.3987	10.0577	0	37.3643	9.83561	0	7.14211	0	0	43.1265	4.28675	5.91393
ENSG00000224204	Y10196.2		X	22180850	22191100	4.46318	23.6032	1.50224	13.2216	0	0	0	0	0	9.27833	56.0465	0	0	1.16417	0	0	8.6253	8.9819	35.347
ENSG00000233407	RP11-567C20.3		1	50671756	50688799	0	0	0	0	0	0	0	0	0	157.612	0	0	0	0.986028	0	0	0	2.14337	0
ENSG00000253123	RP11-527N22.1		8	37184093	37189502	3.27283	7.55325	8.02618	13.2216	11.6678	0	15.0811	4.89347	0	0	18.6822	9.83561	24.0458	3.2779	0	0	8.6253	19.6128	12.5045
ENSG00000228784	AC013400.2		2	20068621	20084808	18.0821	9.08115	2.35135	0	11.6678	0	0	7.95282	0	0	37.3643	0	0	27.6392	18.2532	13.6327	0	6.1352	7.76433
ENSG00000215386	C21orf34	chromosome 21 open reading frame 34 [Source:HGNC Symbol;Acc:1274]	21	17442842	17982094	0.545472	8.17505	0.333654	0	23.3356	48.1562	0	7.86764	10.0577	0	18.6822	0	7.80543	1.93559	18.2532	0	0	12.772	1.98819
ENSG00000226887	AC104066.1		4	53588785	53617807	15.0938	12.3727	10.9576	0	11.6678	0	0	10.1399	0	0	0	31.0072	7.80543	16.782	18.2532	0	17.2506	4.28675	3.92107
ENSG00000235597	AC013402.2		2	105049725	105137290	20.091	4.35083	14.9331	0	11.6678	12.0391	15.0811	2.21905	20.1155	0	0	0	0	15.3417	18.2532	13.6327	0	0	11.6607
ENSG00000254606	RP11-22P4.2		11	28538379	28540888	2.18189	9.70045	3.13737	13.2216	11.6678	0	60.3245	8.02996	0	0	0	4.23431	0	7.41187	0	0	25.8759	9.87908	1.93671
ENSG00000234171	AC108488.3		2	3606082	3609324	5.53969	4.57642	21.8672	0	0	12.0391	15.0811	13.9989	10.0577	0	0	8.46862	0	25.1976	18.2532	0	8.6253	10.9258	2.89989
ENSG00000224286	RP11-297H3.4		1	170240744	170253349	0	2.82818	9.65172	13.2216	70.0068	0	0	3.12735	20.1155	27.815	0	0	0	6.54109	0	0	0	2.14337	1.85891
ENSG00000167117	C17orf73	chromosome 17 open reading frame 73 [Source:HGNC Symbol;Acc:26080]	17	48838390	48844918	12.4987	13.7323	1.74035	0	0	0	0	6.21739	0	0	18.6822	11.2026	7.80543	1.2943	18.2532	13.6327	8.6253	18.4632	25.0489
ENSG00000232416	BPESC1	blepharophimosis, epicanthus inversus and ptosis, candidate 1 (non-protein coding) [Source:HGNC Symbol;Acc:13228]	3	138823027	138844009	4.48159	15.4731	6.45075	26.4431	11.6678	0	0	4.30632	10.0577	0	37.3643	0	8.43497	4.33158	0	0	8.6253	9.71635	9.63597
ENSG00000235881	AC114776.3		2	111467152	111474172	4.9829	6.12653	2.95751	0	0	0	0	6.25585	20.1155	18.5467	37.3643	0	8.43497	17.0844	18.2532	0	0	16.7947	0
ENSG00000255039	RP11-882G5.1		11	97093644	97130987	2.14904	1.41485	0.434489	0	0	0	0	0.559131	0	0	0	0	0	143.542	0	0	0	0	7.71691
ENSG00000225465	RFPL1-AS1	RFPL1 antisense RNA 1 (non-protein coding) [Source:HGNC Symbol;Acc:9978]	22	29833006	29838118	42.1121	11.11	16.7722	26.4431	0	0	0	5.27995	0	0	18.6822	0	0	13.9786	0	0	8.6253	6.83852	5.84794
ENSG00000249095	AC005323.1		17	10286461	10527704	0	1.24827	0.816127	0	11.6678	0	0	0	0	111.29	18.6822	0	7.80543	3.74911	0	0	0	0	0
ENSG00000226194	RP1-137D17.1		6	169770093	169788480	2.14904	0.937715	2.37996	13.2216	0	12.0391	15.0811	5.32321	0	0	74.7286	4.23431	0	1.2943	0	0	8.6253	6.1352	8.82409
ENSG00000255571	AC133637.1		15	89904810	89941718	17.992	8.56905	15.7902	0	23.3356	0	0	3.18328	0	0	0	8.46862	15.6109	5.39163	18.2532	0	17.2506	15.1566	5.97
ENSG00000179082	C9orf106	chromosome 9 open reading frame 106 [Source:HGNC Symbol;Acc:31370]	9	132083295	132087184	10.3646	5.6981	3.92268	0	0	0	0	6.63059	20.1155	0	18.6822	0	0	69.0645	0	0	0	14.4876	4.79902
ENSG00000231345	RP11-564C4.6		10	52415727	52420028	5.39612	26.5757	4.66848	0	0	0	0	5.8985	20.1155	18.5567	18.6822	0	15.6109	13.3877	0	0	0	15.6443	8.67047
ENSG00000246422	CTD-2024I7.13		5	140937878	140944830	4.29808	26.3733	3.71675	0	0	0	30.1623	0.363365	20.1155	0	0	11.2026	8.43497	0.949559	0	40.8981	0	4.69515	1.94414
ENSG00000249017	RP11-58B2.1		5	101836245	101841374	4.46318	4.81306	3.15973	0	0	0	15.0811	8.19029	30.1732	18.5367	0	0	15.6109	3.83357	36.5063	0	8.6253	0	3.92382
ENSG00000254008	NCRNA00051	non-protein coding RNA 51 [Source:HGNC Symbol;Acc:32028]	8	143279717	143290364	16.2305	10.0792	8.67707	13.2216	0	0	0	6.25588	0	0	0	11.2026	7.80543	4.17081	0	13.6327	34.5012	11.5402	15.5151
ENSG00000232117	RP11-490N5.2		13	30726023	30733758	2.18189	7.32696	21.2562	13.2216	11.6678	0	0	2.96106	20.1155	9.26836	18.6822	0	7.80543	8.5987	0	0	8.6253	10.1697	10.8087
ENSG00000240204	RP11-305M3.3		7	129142320	129152759	3.7597	1.84014	0.404962	13.2216	0	0	0	4.61533	30.1732	0	18.6822	0	7.80543	69.0849	0	0	0	0	2.9327
ENSG00000215447	BX322557.10		21	46707967	46711653	30.1681	1.24827	5.68776	0	35.0034	12.0391	0	5.5173	0	0	18.6822	0	0	11.3436	0	0	8.6253	17.0171	6.79992
ENSG00000254154	SEC16B	SEC16 homolog B (S. cerevisiae) [Source:HGNC Symbol;Acc:30301]	1	177897923	178007142	6.08516	0	5.37415	0	0	12.0391	0	12.2159	10.0577	0	0	4.23431	0	4.55182	0	68.1635	17.2506	5.11011	6.80887
ENSG00000179818	AC136007.2		2	70189395	70315686	15.948	11.6262	7.59637	13.2216	35.0034	0	0	9.4415	10.0577	0	0	5.6013	0	1.73888	0	13.6327	17.2506	5.77912	4.80791
ENSG00000224715	CITF22-49D8.1		22	47741319	47769291	5.48975	5.37112	4.13494	13.2216	11.6678	12.0391	0	9.40099	0	0	0	4.23431	0	16.6268	36.5063	13.6327	8.6253	2.90786	7.83922
ENSG00000233878	AC073133.1		7	156230483	156238282	1.63641	12.6068	0	39.6647	0	0	45.2434	6.13463	0	0	0	5.6013	31.2217	2.12848	0	0	0	2.55178	3.82555
ENSG00000234252	AC007308.6		22	21077335	21080208	10.9819	2.82818	3.30475	0	11.6678	0	0	6.69544	0	0	56.0465	21.0382	0	12.899	0	0	0	9.35292	15.5769
ENSG00000226380	AC058791.1		7	130565751	130598069	3.95055	1.77542	11.0241	0	11.6678	12.0391	0	12.5183	10.0577	0	18.6822	9.83561	0	10.4902	36.5063	0	8.6253	0	2.85978
ENSG00000251364	CTD-2516F10.2		11	7448497	7533746	11.2589	8.55926	16.1919	0	0	0	0	24.7772	20.1155	0	18.6822	4.23431	8.43497	11.0917	0	0	17.2506	5.45963	3.96237
ENSG00000226091	RP11-90D4.2		12	8448582	8549399	10.8916	9.31848	8.95765	0	0	0	0	14.983	0	9.27833	0	14.0699	7.80543	6.73335	18.2532	0	8.6253	4.69515	35.5425
ENSG00000255258	RP11-448P19.1		11	133653566	133680395	12.7959	10.5032	8.58286	0	0	0	30.1623	3.70191	10.0577	0	18.6822	4.23431	0	14.6592	0	0	0	31.5913	4.00258
ENSG00000256232	RP11-771K4.1		12	31516415	31522235	3.78546	2.28338	16.6384	0	11.6678	12.0391	0	8.53822	0	9.26836	0	8.46862	0	4.1942	36.5063	0	25.8759	8.68698	0.988553
ENSG00000227480	AC069146.2		2	159023162	159092681	16.6756	0	5.99977	13.2216	11.6678	24.0781	0	4.6288	0	9.27833	18.6822	0	0	6.71085	18.2532	13.6327	0	5.84559	0
ENSG00000247828	CTC-358I24.1		5	87564712	87732502	13.6889	11.107	9.98578	0	0	12.0391	0	2.0112	20.1155	0	0	9.83561	0	14.8962	36.5063	0	0	11.2903	6.73325
ENSG00000223573	PLAC2	placenta-specific 2 (non-protein coding) [Source:HGNC Symbol;Acc:14607]	19	5558178	5568045	0	0	0.779925	13.2216	0	0	0	3.43911	0	0	0	128.263	0	1.93559	0	0	0	0	0
ENSG00000228393	RP11-325F22.3		7	104590762	104653491	4.59941	12.3808	5.36557	0	0	0	45.2434	7.69827	0	0	0	5.6013	7.80543	6.4604	18.2532	0	17.2506	15.6658	0.988553
ENSG00000236466	RP11-795J1.1		6	46459789	46500495	1.76867	2.41025	0.442697	0	11.6678	12.0391	0	1.06695	0	0	74.7286	0	7.80543	2.84941	0	13.6327	8.6253	5.47457	4.79379
ENSG00000253404	AC034243.1		5	138080123	138088998	9.78783	3.44841	6.35762	0	0	0	0	6.84118	30.1732	0	0	14.0699	47.4621	7.42358	18.2532	0	0	0	2.91622
ENSG00000231971	RP11-557H15.3		6	134749378	134841723	8.09063	32.7347	9.85016	0	11.6678	24.0781	0	1.16124	10.0577	0	0	11.2026	7.80543	5.95675	0	13.6327	0	8.39737	1.94414
ENSG00000233391	AC006504.1		19	28284402	28297684	4.96847	11.3543	8.16343	13.2216	23.3356	0	0	3.95313	0	9.26836	0	9.83561	7.80543	2.40296	0	13.6327	8.6253	9.45574	20.4303
ENSG00000248309	CTC-454M9.1		5	88179145	88762215	6.60488	5.95274	6.30187	0	11.6678	0	0	13.6194	40.2309	0	0	0	0	13.387	18.2532	13.6327	0	4.28675	12.5032
ENSG00000246985	RP11-887P2.1		12	93936239	93965544	0.545472	77.4039	6.96979	13.2216	11.6678	0	0	2.64497	0	9.27833	0	5.6013	0	9.00827	0	0	0	2.20226	7.75788
ENSG00000250924	AC007245.1		7	38381216	38418238	3.23998	9.89727	6.0658	0	46.6712	0	0	4.66533	0	9.27833	18.6822	0	8.43497	6.73136	0	0	0	16.2675	16.2897
ENSG00000242258	RP11-511P7.2		7	150130742	150145228	8.35912	26.962	4.67478	13.2216	0	0	0	4.88916	0	9.26836	0	4.23431	0	11.7129	0	0	43.1265	8.39737	10.8845
ENSG00000239922	RP11-71N10.1		3	147657791	147724542	14.1593	5.9829	2.33225	13.2216	0	0	0	11.105	0	18.5367	37.3643	8.46862	7.80543	8.31141	0	0	0	10.422	7.63585
ENSG00000225074	NCRNA00261	non-protein coding RNA 261 [Source:HGNC Symbol;Acc:16189]	20	22541191	22559280	1.63641	5.0176	10.6959	52.8863	11.6678	24.0781	15.0811	3.43633	0	0	0	4.23431	0	3.62264	0	0	8.6253	0	3.97638
ENSG00000249566	AC117517.1		X	23093708	23096495	2.66876	5.00173	2.17831	0	11.6678	0	0	6.18872	0	0	0	5.6013	0	81.674	0	0	17.2506	7.98138	3.94397
ENSG00000230393	AC092667.2		2	100721381	100723966	28.4411	2.64254	7.69695	0	35.0034	0	0	3.80091	0	9.27833	0	8.46862	8.43497	9.50264	18.2532	0	0	6.89741	5.68569
ENSG00000223768	NCRNA00205	non-protein coding RNA 205 [Source:HGNC Symbol;Acc:16420]	21	46713200	46717269	20.4019	4.60453	6.47744	0	11.6678	12.0391	0	2.87969	30.1732	0	0	0	16.8699	8.66197	0	13.6327	8.6253	4.34563	3.69627
ENSG00000236240	GPC5-IT1	GPC5 intronic transcript 1 (non-protein coding) [Source:HGNC Symbol;Acc:41340]	13	93136859	93162347	3.23998	4.52965	9.12863	13.2216	11.6678	12.0391	15.0811	3.95884	10.0577	0	18.6822	0	0	6.95434	0	27.2654	0	5.84559	1.92782
ENSG00000237248	RP11-118B22.2		12	9392599	9395635	1.76867	4.9451	1.183	0	0	0	0	10.0966	10.0577	0	18.6822	11.2026	7.80543	8.43758	36.5063	0	8.6253	22.1098	1.85891
ENSG00000249042	CTD-2015H6.3		5	79778112	79783882	26.9147	3.68558	1.53967	0	11.6678	0	0	16.4631	0	9.26836	0	4.23431	7.80543	13.2624	18.2532	0	8.6253	7.66189	13.6318
ENSG00000228723	AC037193.1		3	9234177	9236137	0	5.15339	2.62065	0	0	0	0	102.394	0	0	0	5.6013	0	0	18.2532	0	8.6253	0	0
ENSG00000215154	AC141586.5		16	2653351	2680495	13.3287	8.99263	6.83276	0	11.6678	24.0781	0	7.4794	0	0	0	4.23431	0	5.27848	0	40.8981	8.6253	8.01141	1.98458
ENSG00000234708	AC006483.1		7	5553485	5565173	6.79573	1.93024	7.58782	13.2216	11.6678	12.0391	0	8.24961	0	0	18.6822	0	7.80543	4.7759	0	27.2654	8.6253	4.75403	7.73091
ENSG00000233725	NCRNA00284	non-protein coding RNA 284 [Source:HGNC Symbol;Acc:26981]	13	44596624	44604073	4.39881	3.47213	2.57329	0	11.6678	0	0	11.1614	0	9.26836	18.6822	8.46862	0	7.71861	18.2532	27.2654	8.6253	4.69515	4.83935
ENSG00000147676	MAL2	mal, T-cell differentiation protein 2 (gene/pseudogene) [Source:HGNC Symbol;Acc:13634]	8	120177273	120257913	8.38088	2.15128	2.30932	0	11.6678	36.1172	0	1.39907	10.0577	0	18.6822	0	15.6109	10.3543	18.2532	0	0	5.10355	0.972072
ENSG00000223396	RPS10P7	ribosomal protein S10 pseudogene 7 [Source:HGNC Symbol;Acc:36423]	1	201487831	201499602	6.45421	13.207	11.9319	0	0	24.0781	0	6.60538	20.1155	0	0	5.6013	0	11.462	0	0	17.2506	16.2877	7.79449
ENSG00000234290	AC116366.6		5	131804579	131808735	1.09094	4.8205	3.4917	0	11.6678	0	15.0811	66.6951	0	9.27833	0	0	0	1.93559	0	0	8.6253	10.1323	7.76456
ENSG00000226482	RP11-240O9.2		3	186569675	186573912	11.1473	6.37813	2.33773	0	11.6678	0	15.0811	5.6423	50.2887	0	0	4.23431	0	9.02734	18.2532	0	0	2.55178	3.9573
ENSG00000239921	RP11-59J16.1		3	127199533	127255655	19.6928	2.20941	1.98302	0	11.6678	12.0391	0	2.35107	0	0	0	0	0	7.95201	0	0	0	34.4669	47.8305
ENSG00000230747	AC021188.4		2	96973001	96987469	5.00865	0.937051	0	0	23.3356	12.0391	0	4.63761	10.0577	0	0	4.23431	7.80543	8.11671	36.5063	0	17.2506	0	9.72879
ENSG00000250905	RP11-707F2.1		4	150587209	150632301	3.21423	11.8061	5.10441	0	0	0	60.3245	12.723	10.0577	0	0	8.46862	0	15.4591	0	0	0	8.59807	3.80305
ENSG00000228486	AC017099.3		2	98280680	98319519	9.24017	3.71665	3.68826	0	0	0	0	6.57811	0	9.27833	0	4.23431	7.80543	11.6628	18.2532	13.6327	34.5012	10.1613	6.76689
ENSG00000226124	AC073043.2		2	200625267	200715896	7.8394	9.07117	7.11741	0	0	0	15.0811	7.75356	10.0577	0	0	0	25.3049	12.7451	0	0	34.5012	5.06617	4.9058
ENSG00000225166	AC012462.2		2	216318430	216328594	6.09959	5.38273	15.6924	0	23.3356	0	15.0811	3.03682	0	0	0	21.0382	0	0.964311	18.2532	13.6327	0	14.5176	1.94414
ENSG00000226963	AC078883.4		2	173292502	173293331	2.72736	28.3766	21.502	13.2216	0	0	0	1.85162	0	9.26836	0	0	8.43497	2.12848	18.2532	0	0	19.2567	13.578
ENSG00000229957	RP5-998H6.2		20	44797043	44799876	6.99969	7.88308	7.34045	0	11.6678	0	0	2.40521	10.0577	0	0	4.23431	0	5.25824	54.7595	0	17.2506	8.75345	1.93671
ENSG00000248388	RP11-313E19.2		4	177590772	177627299	13.1052	8.42389	8.1409	0	0	0	0	11.4204	10.0577	9.26836	0	4.23431	55.2675	6.63688	0	0	0	7.63186	3.77407
ENSG00000231105	RP5-1071N3.1		1	21619783	21626267	17.026	5.95273	4.22326	0	0	12.0391	0	0.925453	10.0577	9.27833	0	14.0699	0	0	18.2532	13.6327	25.8759	6.43012	0
ENSG00000237311	RP6-159A1.3		X	65219593	65220913	7.25841	14.9607	4.47384	0	23.3356	0	0	9.88154	10.0577	0	18.6822	25.2725	0	6.23797	0	0	0	7.67683	9.72867
ENSG00000253699	CTD-3118D11.3		8	87192647	87224465	7.97476	7.58971	13.4411	13.2216	0	12.0391	0	7.41364	0	27.825	0	11.2026	0	11.1716	0	0	0	17.7727	7.7595
ENSG00000247151	RP11-348A11.4		11	33183203	33213144	2.31414	8.51541	9.40012	39.6647	0	0	15.0811	2.73431	0	0	0	5.6013	31.2217	8.00045	0	0	0	6.1352	8.62372
ENSG00000236858	CTA-992D9.6		22	27444106	27456480	11.189	1.2277	4.88541	0	11.6678	0	0	0.525975	0	0	0	0	0	11.5205	91.2659	0	0	2.14337	2.80943
ENSG00000228651	RP11-556E13.1		10	54316462	54515169	0	2.21238	0.404962	0	0	0	0	0.31496	0	92.7634	37.3643	0	0	3.51162	0	0	0	0	0
ENSG00000238287	RP11-656D10.3		1	40958829	40974333	47.3762	5.05768	5.52024	0	0	0	0	8.01141	10.0577	0	18.6822	4.23431	7.80543	4.34367	18.2532	0	0	2.14337	4.94608
ENSG00000250604	RP11-597D13.8		4	159120257	159121594	0	1.82542	1.85251	0	0	0	0	0.807302	110.635	0	0	0	0	1.86338	18.2532	0	0	0	1.01229
ENSG00000224116	AC005027.4		7	41733514	41818986	9.21661	7.56181	4.73019	26.4431	11.6678	0	0	2.95087	0	9.26836	18.6822	0	0	11.8217	18.2532	0	0	7.57298	7.81227
ENSG00000177853	ZNF518A	zinc finger protein 518A [Source:HGNC Symbol;Acc:29009]	10	97889472	97923517	3.30786	37.2861	1.52926	13.2216	0	0	0	2.99854	0	0	37.3643	8.46862	0	10.432	0	0	0	8.39737	12.8442
ENSG00000230910	RP3-525N10.2		6	69342555	69344216	29.0859	0	1.27638	13.2216	0	0	0	0.469706	0	0	0	0	0	10.5314	73.0127	0	0	3.22735	4.97972
ENSG00000257006	RP11-684O24.1		12	19411205	19412877	7.02544	10.2364	3.14798	0	23.3356	0	0	12.5916	0	0	18.6822	4.23431	0	7.72576	18.2532	0	17.2506	4.40451	8.64835
ENSG00000232442	CTD-3184A7.4		20	62258580	62260177	7.32279	5.03999	1.29656	0	0	0	0	8.6743	10.0577	18.5567	0	0	23.4163	19.8685	0	0	17.2506	0	23.8917
ENSG00000233730	RP4-666F24.3		1	115642293	115645279	3.30786	0	0.452924	0	11.6678	0	30.1623	78.079	0	0	0	0	0	0	0	0	8.6253	2.9228	0
ENSG00000255082	RP11-657K20.2		11	88237744	88257222	15.7694	0.996159	6.42392	13.2216	0	0	0	11.0057	20.1155	0	0	4.23431	0	11.6919	36.5063	0	0	11.7169	2.9719
ENSG00000229563	RP11-245M24.1		X	45364633	45489447	0	8.35727	0.658277	0	0	24.0781	0	0.472486	0	9.27833	0	0	0	16.5719	18.2532	13.6327	34.5012	8.33746	0
ENSG00000241469	RP11-631B21.1		3	107560509	107596926	4.49602	8.1628	3.48977	0	23.3356	0	0	4.49706	20.1155	0	0	14.0699	0	2.74282	36.5063	0	8.6253	0	7.84575
ENSG00000231383	RP11-293N1.1		3	191955826	192000886	0.545472	5.39375	6.78049	0	0	0	0	17.2041	20.1155	0	0	29.5068	15.6109	3.66484	18.2532	0	8.6253	5.11011	2.97313
ENSG00000229589	RP11-216F19.1		3	38492518	38496311	29.6335	3.32559	3.47817	13.2216	11.6678	0	0	5.87934	10.0577	9.27833	0	0	0	13.3628	0	13.6327	0	13.4476	6.75204
ENSG00000196295	AC005154.6		7	30555925	30604233	9.62648	7.28317	1.87537	13.2216	0	12.0391	0	3.74932	0	9.26836	18.6822	8.46862	0	6.97028	18.2532	0	17.2506	0	6.97809
ENSG00000233613	DCUN1D2-AS2	DCUN1D2 antisense RNA 2 (non-protein coding) [Source:HGNC Symbol;Acc:39889]	13	114123216	114130450	2.31414	0	4.16184	0	0	0	0	0.520463	0	9.27833	0	0	0	115.529	0	0	0	0	1.83736
ENSG00000174365	SNHG11	small nucleolar RNA host gene 11 (non-protein coding) [Source:HGNC Symbol;Acc:25046]	20	37075221	37079564	0	4.68295	4.71924	0	0	0	15.0811	4.08937	10.0577	0	0	0	31.8513	5.21985	36.5063	0	17.2506	2.14337	1.98458
ENSG00000234327	AC012146.7		17	5015227	5017672	15.7609	3.25582	18.5849	0	0	0	0	10.0619	30.1732	0	0	14.0699	23.4163	3.68922	0	0	0	6.45469	7.56615
ENSG00000247572	CTC-281B15.1		5	80499915	80597379	4.46318	0	4.55643	0	0	0	15.0811	12.7883	20.1155	0	0	0	16.2404	16.6865	0	27.2654	8.6253	2.20226	4.80791
ENSG00000249271	AC021224.1		18	29992145	29993199	15.4298	10.1591	16.1082	13.2216	11.6678	0	0	3.04655	0	0	0	4.23431	23.4163	4.64193	0	0	8.6253	20.3184	1.95578
ENSG00000232607	MIR497HG	mir-497-195 cluster host gene (non-protein coding) [Source:HGNC Symbol;Acc:39523]	17	6919137	6922949	6.69851	5.45265	1.59047	0	0	0	0	0.861275	0	9.26836	37.3643	4.23431	8.43497	3.55291	36.5063	0	0	13.1729	5.68524
ENSG00000233137	RP11-220I1.1		9	37079893	37090398	15.0685	4.91376	3.36816	0	0	0	0	10.7256	20.1155	0	0	0	8.43497	11.9761	0	27.2654	17.2506	2.14337	11.4272
ENSG00000255998	RP11-407A16.7		12	127175025	127180378	2.84518	7.02571	0.83321	13.2216	0	0	0	10.729	20.1155	0	37.3643	14.0699	0	2.11373	18.2532	0	0	0	5.7942
ENSG00000182165	TP53TG1	TP53 target 1 (non-protein coding) [Source:HGNC Symbol;Acc:17026]	7	86954541	86974831	12.5895	6.31553	6.76948	0	0	12.0391	0	26.0257	0	9.27833	0	4.23431	23.4163	6.29257	0	0	8.6253	3.22735	13.5285
ENSG00000244701	RP5-894A10.2		7	141352181	141356610	5.90874	4.88141	1.2959	0	0	0	0	12.3974	0	0	0	0	0	32.8972	36.5063	13.6327	8.6253	12.2704	3.79562
ENSG00000231770	AC046143.5		3	194304740	194310989	1.76867	0	1.4382	0	0	0	0	6.55078	0	0	18.6822	0	0	0.949559	18.2532	68.1635	8.6253	5.06617	1.85891
ENSG00000232274	BX571672.2		1	143118704	143211070	0	3.1148	0.434489	0	0	0	0	7.04723	10.0577	0	0	5.6013	0	4.47854	0	0	69.0024	17.4017	13.6614
ENSG00000245949	AC074099.1		2	157193084	157198632	7.6057	4.23501	3.25977	0	0	12.0391	15.0811	4.47278	10.0577	9.26836	0	4.23431	7.80543	3.06965	18.2532	13.6327	8.6253	7.95909	0.98371
ENSG00000237870	AC073130.1		7	115915660	115926788	26.3014	4.47347	4.13282	13.2216	0	0	0	5.53167	10.0577	0	0	4.23431	7.80543	4.96879	0	13.6327	0	18.4483	17.6479
ENSG00000227415	RP1-91G5.3		1	152346430	152417932	0	1.82542	0.404962	13.2216	11.6678	0	0	2.53269	10.0577	0	0	0	0	52.8847	18.2532	0	17.2506	0	1.98436
ENSG00000132832	RP11-445H22.3		20	43285092	43324737	9.25522	8.47463	0.226462	13.2216	11.6678	12.0391	0	2.00096	0	27.835	0	0	0	2.93883	18.2532	0	0	21.8833	1.93671
ENSG00000154035	C17orf103	chromosome 17 open reading frame 103 [Source:HGNC Symbol;Acc:30770]	17	21142183	21156722	2.18189	5.23291	5.81476	0	11.6678	0	0	5.498	0	9.26836	0	14.0699	7.80543	3.52898	0	27.2654	17.2506	8.38243	11.6364
ENSG00000233821	RP11-191J12.1		13	44118054	44122192	7.92171	14.7171	6.06054	0	0	0	15.0811	7.68875	20.1155	0	0	0	7.80543	3.22292	0	13.6327	17.2506	7.97403	7.91477
ENSG00000254192	CTC-558O2.2		5	168081518	168094766	18.4716	6.15014	10.7734	0	0	12.0391	0	8.12334	0	9.27833	37.3643	4.23431	0	7.17622	0	0	0	12.742	2.96807
ENSG00000247296	AL451000.1		1	23940283	23945957	3.78546	11.109	7.5142	52.8863	11.6678	0	0	3.7074	0	0	18.6822	0	0	8.19055	0	0	0	0	10.742
ENSG00000232411	AC009495.3		2	166689558	166695608	5.69036	7.90863	2.70206	13.2216	0	0	0	1.48456	0	9.26836	18.6822	0	0	8.97541	0	0	0	57.2342	2.96026
ENSG00000234105	GS1-278J22.1		7	53582685	53584809	5.00865	12.8365	12.1453	0	11.6678	0	0	5.11151	0	18.5467	0	0	0	7.20228	18.2532	0	25.8759	4.69515	6.73573
ENSG00000242828	RP11-47P18.1		3	80810193	80838114	8.26705	8.68089	12.6086	0	23.3356	12.0391	0	10.9252	0	0	0	4.23431	0	9.68324	18.2532	0	8.6253	5.4296	5.78381
ENSG00000254615	OXR1	oxidation resistance 1 [Source:HGNC Symbol;Acc:15822]	8	107282481	107285002	13.8247	7.42205	3.57829	0	0	0	0	0.45502	10.0577	0	0	4.23431	0	55.2173	18.2532	0	0	13.6247	0.972072
ENSG00000223704	RP1-90L6.2		22	27254597	27261749	5.00865	1.03511	4.13739	0	0	24.0781	0	1.35648	0	0	0	25.2725	8.43497	4.9787	0	0	34.5012	18.8183	0
ENSG00000249550	RP11-438N16.1		12	114117264	114211488	6.61573	1.41485	0.776351	0	0	0	0	2.80571	0	0	0	0	0	110.546	0	0	0	5.06617	0
ENSG00000247185	SUZ12P	suppressor of zeste 12 homolog pseudogene [Source:HGNC Symbol;Acc:32421]	17	29036657	29097067	3.8183	9.0727	18.2903	0	11.6678	12.0391	0	6.87459	10.0577	0	0	0	7.80543	12.323	18.2532	0	0	8.59807	7.84168
ENSG00000255867	RP11-820K3.5		12	31742857	31768600	12.6751	8.8292	7.826	0	23.3356	0	0	15.0313	0	0	0	0	15.6109	5.95509	0	13.6327	17.2506	5.37072	0.988553
ENSG00000254325	RP11-318K15.2		8	56806154	56808276	1.63641	7.07712	2.55705	13.2216	0	12.0391	0	8.43859	0	9.26836	18.6822	9.83561	0	7.3992	18.2532	0	0	11.2603	6.72431
ENSG00000235099	RP1-23E21.2		6	93780105	93813102	11.3141	8.68463	4.40028	0	11.6678	0	0	7.94105	0	0	18.6822	8.46862	0	11.8772	18.2532	0	17.2506	0	7.78773
ENSG00000227712	RP11-418J17.3		1	119802888	119869926	2.84518	1.28663	0	0	0	0	0	0.871718	0	0	0	0	0	1.2943	0	0	8.6253	2.14337	109.147
ENSG00000248165	RP11-44F21.2		4	75919087	75960034	0.545472	10.2933	17.1987	0	11.6678	12.0391	0	0.765929	0	18.5467	0	4.23431	7.80543	5.17775	0	0	0	0	37.4187
ENSG00000235142	RP1-60O19.1		6	107165327	107235354	0.545472	0.934085	0.893483	0	81.6746	0	0	0.970397	0	0	0	0	0	4.03969	36.5063	0	0	0	0
ENSG00000226673	RP11-359N11.2		6	14280358	14285376	0	6.83322	2.5377	0	0	0	0	5.05623	0	0	0	5.6013	8.43497	2.84868	18.2532	0	25.8759	11.2453	38.8116
ENSG00000254119	RP11-705O24.1		8	62697606	62856739	1.09094	5.40956	9.76556	0	11.6678	0	0	9.05133	20.1155	0	0	0	8.43497	20.3526	0	27.2654	0	8.3524	3.98036
ENSG00000234912	C17orf86	chromosome 17 open reading frame 86 [Source:HGNC Symbol;Acc:33099]	17	75084755	75091068	7.72158	9.14344	6.41812	0	0	0	0	10.5789	0	18.5467	0	0	24.0458	23.2431	0	13.6327	0	4.28675	7.72175
ENSG00000228183	GS1-279B7.1		1	185290288	185304171	6.74845	25.6821	5.88538	0	11.6678	0	0	9.43342	0	0	18.6822	4.23431	24.6754	5.14364	0	0	0	12.742	0
ENSG00000234384	RP11-158A8.1		13	91145541	91187334	0	3.1018	3.2878	0	46.6712	0	0	7.32801	0	0	0	9.83561	7.80543	6.35328	0	13.6327	25.8759	0	0.98371
ENSG00000232265	XXyac-YX155B6.5		1	147634989	147635692	13.6611	0	1.10365	0	0	12.0391	0	0.44827	80.4619	0	0	0	0	2.92989	0	13.6327	0	0	0
ENSG00000247950	RP11-264J9.1		4	110268631	110354973	2.69451	0.937051	3.90078	0	11.6678	0	0	1.41048	40.2309	0	18.6822	0	0	13.3472	0	13.6327	8.6253	3.22735	5.70189
ENSG00000245832	RP11-179A16.1		11	81590893	82429124	28.0113	1.11618	2.60796	0	11.6678	0	0	1.29286	10.0577	0	0	0	16.2404	15.9275	18.2532	13.6327	0	0	4.94484
ENSG00000246432	AC010913.1		2	73511662	73518113	9.37242	2.22435	9.83148	0	0	0	0	8.99072	0	0	0	4.23431	7.80543	8.02509	36.5063	0	25.8759	6.83852	3.71782
ENSG00000248175	CTC-428G20.3		5	114539713	114541943	12.7981	18.1524	4.70821	0	0	0	0	3.49005	0	0	0	4.23431	0	10.2166	36.5063	0	17.2506	6.1352	9.76956
ENSG00000224863	RP5-1109J22.2		1	46912345	46915376	9.40589	6.48002	0.78444	0	23.3356	12.0391	0	1.36895	0	0	0	4.23431	15.6109	0.964311	36.5063	0	0	6.1352	5.79488
ENSG00000245460	AC079305.1		2	178107103	178111509	4.96847	3.45204	6.21843	0	0	0	0	4.46419	10.0577	9.27833	18.6822	12.7029	0	7.94283	0	13.6327	8.6253	13.7681	8.67379
ENSG00000213963	AC074286.1		2	178148236	178257419	4.85065	7.52885	6.14426	13.2216	11.6678	0	0	3.03894	0	0	18.6822	8.46862	0	5.0914	18.2532	0	17.2506	0	7.87062
ENSG00000228383	FAM197Y7	family with sequence similarity 197, Y-linked, member 7 [Source:HGNC Symbol;Acc:37469]	Y	9205412	9235047	29.7455	2.15069	0	0	11.6678	12.0391	0	0.497911	20.1155	0	37.3643	0	0	4.53843	0	0	0	0	3.87342
ENSG00000248092	RP11-159F24.1		5	43575425	43603332	19.8344	2.70727	0.452924	0	0	24.0781	0	1.60799	0	9.27833	0	0	0	50.8576	0	0	8.6253	0	3.84833
ENSG00000237380	AC009336.21		2	176986339	177001826	6.45421	6.0842	4.33017	0	11.6678	0	0	1.12451	0	18.5367	0	0	8.43497	1.89798	18.2532	0	8.6253	31.9247	3.89249
ENSG00000236758	MTUS2-AS2	MTUS2 antisense RNA 2 (non-protein coding) [Source:HGNC Symbol;Acc:40923]	13	29813516	29824691	4.06837	1.86817	0	79.3294	35.0034	0	0	0.811634	0	0	0	0	0	0	0	0	0	0	0
ENSG00000233208	AL096869.5		14	90921574	90925249	10.1036	6.18121	1.63009	0	0	0	0	4.15887	10.0577	0	18.6822	15.4369	8.43497	17.5164	0	0	0	15.0036	13.7302
ENSG00000246393	AC008105.1		17	43289616	43299132	0	3.19026	0.329139	0	0	0	30.1623	3.20361	0	0	18.6822	35.1081	0	1.10866	0	0	0	0	29.1082
ENSG00000246022	RP11-124N2.3		3	125898908	125929012	9.54369	7.29906	0.825593	13.2216	0	0	0	8.16331	0	0	37.3643	8.46862	0	9.88717	0	0	17.2506	5.77912	2.9719
ENSG00000226458	RP11-417O11.6		10	75788171	75789962	0.545472	10.1017	11.6837	0	11.6678	0	0	6.06008	20.1155	0	18.6822	14.0699	0	3.36727	0	0	17.2506	6.60677	0
ENSG00000253344	RP11-346L1.2		8	37483533	37531905	6.7813	26.5718	7.13284	0	0	0	0	12.3825	0	0	0	0	7.80543	8.17098	0	0	17.2506	22.5589	10.6262
ENSG00000230941	AC002386.1		7	108962377	108966372	0	25.6794	10.6557	0	23.3356	0	30.1623	2.86843	10.0577	0	0	4.23431	0	3.77082	0	0	0	2.14337	5.8242
ENSG00000228775	RP5-894A10.5		7	141404138	141438146	2.29971	0.934085	0	13.2216	11.6678	12.0391	15.0811	35.2684	0	0	0	8.46862	0	3.06965	0	13.6327	0	2.9228	0
ENSG00000246273	RP11-540A21.3		11	9779839	9832866	10.6846	10.9944	10.3525	13.2216	0	0	0	7.21587	0	0	0	8.46862	0	1.89798	18.2532	13.6327	8.6253	12.3197	2.84965
ENSG00000214039	RP11-474D1.4		12	130517999	130529602	18.878	3.01476	1.91564	26.4431	0	0	0	2.21361	0	0	18.6822	25.4059	0	7.19147	0	0	0	11.6247	2.949
ENSG00000232913	RP11-429H9.4		10	95841707	95868542	12.7131	2.15128	9.02649	0	11.6678	0	45.2434	0.31496	0	0	0	0	0	17.8764	18.2532	0	0	0	0.972072
ENSG00000254549	RP4-541C22.4		11	33730981	33731568	5.71922	6.33925	3.18336	26.4431	0	0	15.0811	5.25122	0	0	18.6822	8.46862	7.80543	7.23946	0	0	0	6.15014	7.79697
ENSG00000255458	RP11-539G18.2		4	39640760	39668264	17.4324	3.22043	3.5815	0	11.6678	0	0	8.23959	30.1732	0	0	0	8.43497	6.18292	0	13.6327	8.6253	4.34563	1.97294
ENSG00000240045	RP11-451G4.2		3	155008018	155011564	4.33093	3.39897	1.63552	0	0	0	30.1623	7.16225	0	18.5567	0	4.23431	0	6.41659	18.2532	0	17.2506	4.75403	0.988553
ENSG00000223440	RP11-555J4.4		9	32633452	32648683	5.51394	2.32174	3.93685	0	0	0	0	5.83633	30.1732	0	0	9.83561	7.80543	9.36874	0	27.2654	8.6253	6.45469	0
ENSG00000188477	CLEC19A	C-type lectin domain family 19, member A [Source:HGNC Symbol;Acc:34522]	16	19297061	19333467	12.7868	3.73583	2.81764	0	11.6678	12.0391	0	8.51984	0	9.27833	0	0	7.80543	13.7567	0	13.6327	0	12.2092	8.77499
ENSG00000246777	AC044802.1		16	66785655	66788643	22.2719	10.4956	6.58683	0	11.6678	0	0	10.6781	0	0	0	5.6013	0	14.4881	0	13.6327	8.6253	5.10355	7.53924
ENSG00000237047	RP11-432J9.3		10	72689682	72691814	3.7597	1.99232	1.61787	66.1078	23.3356	0	0	0.723039	0	0	0	0	0	1.67614	0	0	8.6253	8.76839	0
ENSG00000214049	UCA1	urothelial cancer associated 1 (non-protein coding) [Source:HGNC Symbol;Acc:37126]	19	15939757	15947130	2.66876	1.11618	0.677248	26.4431	46.6712	0	0	0.634644	10.0577	0	0	21.0382	0	4.35759	0	0	0	2.9228	0
ENSG00000230628	RP4-781K5.6		1	234805269	234831900	4.44875	1.41409	0	0	0	12.0391	0	6.95681	20.1155	0	0	4.23431	0	22.4981	0	0	25.8759	10.5847	7.90357
ENSG00000230269	RP1-40E16.9		6	3182978	3195990	1.09094	31.5688	3.43686	0	0	0	0	0.520463	0	0	0	0	0	0.949559	0	0	8.6253	50.8486	18.6294
ENSG00000247982	AC016525.1		15	57592563	57599965	10.6049	3.47262	7.03467	13.2216	0	0	15.0811	4.19662	0	0	18.6822	4.23431	7.80543	1.57864	18.2532	0	0	0	11.4386
ENSG00000248508	AC021755.4		15	40331512	40359491	8.29076	1.41485	2.287	0	0	0	0	8.69675	0	18.5367	0	4.23431	32.4808	0.964311	36.5063	0	0	0	1.93671
ENSG00000253230	RP11-403C10.2	microRNA 124-1 (MIR124-1), microRNA [Source:RefSeq DNA;Acc:NR_029668]	8	9757574	9762876	5.94159	0	1.22262	13.2216	0	12.0391	0	2.93215	20.1155	0	0	0	7.80543	23.5686	0	13.6327	8.6253	5.84559	0
ENSG00000108819	PPP1R9B	protein phosphatase 1, regulatory (inhibitor) subunit 9B [Source:HGNC Symbol;Acc:9298]	17	48211104	48227991	11.7458	4.23643	2.51201	0	0	0	0	8.21901	0	0	0	4.23431	15.6109	11.7934	0	0	0	5.05123	51.481
ENSG00000237489	RP11-500G10.1		10	131864638	131909081	3.85333	10.2144	4.20685	13.2216	0	0	0	3.72314	0	0	18.6822	8.46862	0	5.08657	0	0	25.8759	17.5368	3.87197
ENSG00000247774	RP11-493L12.2		12	47599681	47610239	5.70479	4.10427	3.73054	13.2216	0	0	15.0811	6.99618	0	0	0	4.23431	15.6109	10.8408	0	0	0	3.22735	31.7856
ENSG00000233393	AP000688.29		21	37477179	37481988	3.30786	4.15302	10.7888	0	0	0	0	27.5246	0	0	0	16.8039	0	7.45351	18.2532	0	17.2506	2.90786	5.78763
ENSG00000232043	RP4-530I15.9		20	49187512	49194578	5.36327	9.09308	13.5141	0	11.6678	0	0	9.04903	10.0577	0	0	5.6013	7.80543	2.89293	0	0	25.8759	8.33746	4.8672
ENSG00000231889	TRAF3IP2-AS1	TRAF3IP2 antisense RNA 1 (non-protein coding) [Source:HGNC Symbol;Acc:40005]	6	111804714	111919505	7.9011	4.46414	8.61241	0	0	12.0391	15.0811	7.51927	0	9.27833	0	9.83561	16.8699	14.7032	0	0	0	2.90786	4.77933
ENSG00000244324	RP11-67L3.6		1	55314138	55316072	2.29971	2.18532	1.25741	26.4431	0	0	30.1623	5.52452	0	0	37.3643	0	0	2.68844	0	0	0	2.9228	2.9719
ENSG00000254988	CTD-2547H18.1		11	76666461	76689663	3.78546	21.9894	15.4346	0	0	0	0	4.49442	40.2309	0	0	0	0	7.98866	0	0	0	6.1352	13.5467
ENSG00000234686	AC010971.1		7	49269733	49294412	3.23998	5.46453	4.40235	13.2216	0	0	0	4.09499	10.0577	0	18.6822	0	16.2404	8.99814	0	0	17.2506	5.06617	6.87751
ENSG00000241388	HNF1A-AS1	HNF1A antisense RNA 1 (non-protein coding) [Source:HGNC Symbol;Acc:26785]	12	121406416	121418768	2.84518	6.52931	7.01441	0	11.6678	12.0391	30.1623	9.51294	0	0	0	5.6013	7.80543	5.69622	0	13.6327	0	0	1.00087
ENSG00000253864	AC131025.8		5	148786526	148793660	11.0789	5.26721	1.0109	13.2216	0	12.0391	0	8.08382	0	0	18.6822	0	0	22.4925	0	0	8.6253	7.98138	4.8982
ENSG00000256928	RP11-809N8.2		11	73106604	73107481	0	3.04642	2.08136	0	23.3356	0	0	9.29418	0	0	0	22.4052	0	0.949559	0	13.6327	25.8759	2.55178	9.92962
ENSG00000249111	RP11-622J8.1		4	60018552	60041864	9.92359	2.31043	1.6637	13.2216	11.6678	0	0	5.29153	10.0577	0	0	0	7.80543	4.35576	18.2532	13.6327	8.6253	2.14337	3.97885
ENSG00000162290	DCP1A	DCP1 decapping enzyme homolog A (S. cerevisiae) [Source:HGNC Symbol;Acc:18714]	3	53317448	53381637	3.85333	3.5972	4.64117	13.2216	0	12.0391	15.0811	2.13698	0	0	0	0	8.43497	5.13197	0	0	0	15.4366	29.2015
ENSG00000253479	RP11-744J10.3		8	70337270	70360479	0	0	0	0	0	0	0	0	0	0	0	94.2551	0	0	18.2532	0	0	0	0
ENSG00000237298	AC009948.3		2	179387554	179484941	0	10.3744	1.28636	79.3294	11.6678	0	0	4.79967	0	0	0	4.23431	0	0.789322	0	0	0	0	0
ENSG00000251335	AL353709.1		1	195727482	195732530	0	3.83246	4.45082	79.3294	0	0	0	1.40811	0	0	18.6822	0	0	2.09469	0	0	0	2.55178	0
ENSG00000229269	RP11-298A8.2		X	140013903	140079613	5.55412	4.40207	1.12803	13.2216	35.0034	0	0	4.00093	0	0	18.6822	9.83561	7.80543	9.85664	0	0	0	0	2.84965
ENSG00000228495	RP3-523C21.1		6	132453055	132490514	2.31414	10.2168	1.98127	13.2216	0	12.0391	0	3.28893	10.0577	18.5467	18.6822	0	0	2.09469	0	0	0	13.8346	5.96303
ENSG00000251182	RP11-617I14.1		4	31172766	31213297	1.09094	1.03511	1.26192	0	0	0	0	0	10.0577	0	37.3643	0	0	1.10866	36.5063	0	0	8.02635	15.4865
ENSG00000231160	RP11-617D20.1		4	38614322	38666504	9.21661	2.73893	3.87187	0	11.6678	0	15.0811	9.14923	20.1155	0	0	4.23431	7.80543	9.76358	0	0	17.2506	0	0.972072
ENSG00000206573	RP11-58B17.1		3	9391373	9440263	1.76867	5.81185	16.5678	0	0	0	30.1623	10.9234	0	9.27833	0	0	15.6109	8.59143	0	0	0	2.90786	9.89468
ENSG00000235848	AC016689.1		2	38177477	38263484	0	0	1.38357	0	58.339	0	0	0.336035	0	0	0	11.2026	0	6.76729	18.2532	0	0	6.43012	8.77637
ENSG00000248019	FAM13AOS	FAM13A opposite strand (non-protein coding) [Source:HGNC Symbol;Acc:19370]	4	89630940	89651254	13.3751	1.89858	0.333654	0	0	0	0	6.4283	0	0	0	0	0	35.8399	18.2532	27.2654	0	2.14337	5.92213
ENSG00000231193	RP11-462B18.2		9	32840596	32841760	2.84518	3.63795	0.631424	0	0	0	0	9.5506	10.0577	0	0	0	72.767	3.18163	0	0	8.6253	0	0
ENSG00000241131	RP11-639B1.1		3	147795946	147805816	3.30786	10.0152	17.752	0	0	0	0	2.90995	20.1155	0	0	9.83561	0	3.53951	18.2532	13.6327	8.6253	3.22735	0
ENSG00000243583	RP4-669B10.3		7	143651937	143694405	2.69451	3.57788	0	13.2216	11.6678	12.0391	0	8.04268	20.1155	0	0	5.6013	0	7.48155	0	13.6327	8.6253	2.14337	1.98819
ENSG00000241490	RP11-553L6.2		3	113933160	113955051	5.53969	9.01269	2.48685	13.2216	11.6678	0	0	1.66897	40.2309	0	0	0	0	6.09193	0	0	8.6253	5.84559	5.86475
ENSG00000236673	RP11-69I8.2		6	132223103	132241705	4.33093	8.36326	33.7404	0	11.6678	0	0	7.41156	0	0	0	9.83561	0	4.87708	18.2532	0	8.6253	2.14337	0.972072
ENSG00000247498	RP11-392P7.8		12	13080660	13137579	51.2067	2.2628	0.442697	0	0	0	0	4.2446	10.0577	0	18.6822	0	0	0.789322	0	0	17.2506	4.28675	0.988553
ENSG00000243321	RP11-167H9.3		3	149795281	149797904	6.03522	1.92282	7.34806	13.2216	0	12.0391	0	5.4083	10.0577	9.26836	18.6822	14.0699	0	5.38273	0	0	0	5.47457	0.98371
ENSG00000248339	RP11-717H13.1		4	172210626	172219418	4.29808	4.06075	2.17561	0	11.6678	0	15.0811	2.81868	10.0577	0	18.6822	15.4369	0	7.25319	18.2532	0	0	0	0
ENSG00000230215	RP11-328G15.2		3	184264502	184274706	23.1828	6.84707	1.67555	0	35.0034	0	0	6.54541	0	0	0	8.46862	0	4.8375	0	0	8.6253	14.1765	0
ENSG00000185904	RP11-178A10.1		10	42970991	42990784	17.9246	1.87543	1.70974	0	11.6678	12.0391	0	3.30892	10.0577	0	0	5.6013	15.6109	1.67614	0	0	8.6253	18.8193	0
ENSG00000254990	RP11-108O10.2		11	111639392	111649074	3.95055	25.6833	1.66376	13.2216	0	0	0	1.54143	0	0	0	0	0	5.78087	0	13.6327	0	2.14337	41.0319
ENSG00000249346	RP3-468B3.3		6	33835283	33864691	6.16747	3.74657	5.80803	0	0	0	0	8.46959	10.0577	9.27833	18.6822	4.23431	0	12.2054	0	13.6327	8.6253	0	7.69789
ENSG00000234899	AC005152.2		17	70067183	70216859	7.85383	0.902423	2.49476	0	0	12.0391	0	4.86036	10.0577	0	0	0	0	7.00389	54.7595	0	8.6253	0	0
ENSG00000188070	C11orf95	chromosome 11 open reading frame 95 [Source:HGNC Symbol;Acc:28449]	11	63527364	63536113	14.6292	7.42292	17.5034	0	11.6678	0	0	2.75278	0	18.5467	0	9.83561	0	2.14057	0	0	8.6253	8.75345	6.59513
ENSG00000229727	AC013460.1		2	7561392	7590385	11.5986	3.46131	1.75673	13.2216	11.6678	0	0	5.8344	0	9.27833	18.6822	9.83561	0	12.4146	0	0	0	5.83065	4.86197
ENSG00000225489	RP11-390F4.3		9	6716548	6727438	12.7282	3.58919	1.98794	0	0	0	0	12.108	0	0	18.6822	0	7.80543	9.4935	18.2532	0	0	16.6383	6.96161
ENSG00000242618	RP11-433A10.2		3	72252095	72259043	5.83704	5.58429	2.5899	13.2216	11.6678	0	0	4.49181	0	0	18.6822	11.2026	0	8.16279	0	0	17.2506	5.45963	3.98903
ENSG00000244161	RP11-456N14.2		3	58148274	58156363	2.29971	3.65108	4.55308	0	0	0	15.0811	6.84702	30.1732	0	18.6822	5.6013	0	6.51691	0	13.6327	0	0	0
ENSG00000228414	AC010733.4		2	61052267	61108449	3.85333	7.79818	0.654935	0	0	0	0	7.23035	10.0577	18.5467	18.6822	4.23431	16.2404	1.75363	0	0	8.6253	2.55178	6.69448
ENSG00000233834	AC005083.1		7	20257200	20261323	0	0	6.50894	0	23.3356	0	0	30.1062	0	0	0	0	0	1.89798	0	0	43.1265	0	1.94414
ENSG00000246090	RP11-696N14.1		4	100010008	100222513	1.09094	1.97282	3.1029	0	0	0	0	14.5786	20.1155	0	18.6822	5.6013	16.8699	5.57757	0	0	17.2506	0	1.95578
ENSG00000242512	RP11-416O18.1		3	181670161	181721841	5.83704	15.4644	5.45042	0	0	0	0	24.1318	20.1155	0	0	9.83561	7.80543	5.48799	0	0	8.6253	2.9228	1.01229
ENSG00000247225	AL031123.1		6	6725119	6730139	0	3.25356	3.67926	0	11.6678	24.0781	15.0811	4.55385	0	0	0	0	8.43497	6.95398	18.2532	0	8.6253	0	1.96062
ENSG00000234635	RP11-9E13.2		10	70237755	70240521	2.14904	8.18962	2.19148	0	23.3356	12.0391	0	9.14073	10.0577	0	0	4.23431	7.80543	9.07614	0	0	8.6253	4.75403	4.93842
ENSG00000256298	RP11-474D1.1		12	130531677	130532921	10.9853	1.03511	1.98052	0	11.6678	12.0391	0	5.9559	0	0	18.6822	5.6013	0	1.67614	0	13.6327	0	7.95909	15.3089
ENSG00000249476	CTD-2587M2.1		5	108572821	108662070	0	5.32718	2.23743	0	11.6678	0	30.1623	2.58594	10.0577	0	0	0	0	1.2943	0	13.6327	8.6253	17.047	3.79314
ENSG00000245648	RP11-277P12.20		12	10516368	10551105	11.8854	5.4913	2.15754	13.2216	23.3356	0	0	11.0815	0	0	0	0	7.80543	10.7431	0	0	0	14.5025	5.85643
ENSG00000251582	RP11-464F9.9		10	75432880	75435692	15.1215	6.09027	0.779925	26.4431	0	0	0	7.40844	10.0577	0	0	14.0699	0	3.99893	0	0	0	13.3864	8.69979
ENSG00000256128	RP11-173C20.2		12	127214333	127256957	5.97662	0.937051	0.90371	26.4431	0	0	0	6.88619	10.0577	0	18.6822	0	0	14.9561	0	0	8.6253	11.4963	1.01229
ENSG00000239205	RP11-747D18.1		3	164867794	164875850	10.928	5.93757	0.932785	13.2216	11.6678	0	0	8.71447	0	0	37.3643	0	0	9.98943	0	0	0	3.22735	3.8382
ENSG00000256995	RP11-114G22.1		12	22852793	23327057	4.99422	7.29792	8.58502	13.2216	0	0	0	3.09934	10.0577	0	18.6822	4.23431	8.43497	3.06215	0	0	8.6253	8.65695	6.76346
ENSG00000226029	RP4-798A10.2		1	16787443	16794976	3.21423	1.87477	3.22813	0	0	0	0	4.51931	0	9.26836	18.6822	9.83561	7.80543	4.32884	18.2532	0	0	8.01797	16.367
ENSG00000255002	CTD-2509G16.2		14	65679611	65689065	8.1827	0.937051	1.1906	0	0	0	0	28.9148	20.1155	0	0	4.23431	8.43497	6.90732	18.2532	0	0	3.22735	4.84824
ENSG00000204603	RP11-638F5.1		12	131649556	131697476	0	1.8718	5.60973	13.2216	35.0034	0	0	4.11232	0	0	18.6822	4.23431	0	3.25478	18.2532	0	0	0	0.98371
ENSG00000232998	RP11-470P4.2		9	79791672	79792910	5.45472	0	7.96876	0	23.3356	0	0	6.0486	0	0	18.6822	0	0	7.7705	18.2532	0	8.6253	5.11011	3.89524
ENSG00000237054	AL132780.10		14	23388665	23392610	0	0	3.07789	13.2216	0	0	0	78.6922	10.0577	0	0	0	0	0	0	0	0	0	0
ENSG00000251432	RP11-420A23.1		4	129213906	129440549	5.33752	3.63978	2.87787	0	0	24.0781	0	6.1944	0	0	0	12.7029	0	7.55173	18.2532	13.6327	8.6253	2.14337	0
ENSG00000247180	AC018665.1		17	74136637	74150364	4.48159	0.996159	1.0794	0	35.0034	0	0	4.42229	20.1155	0	18.6822	0	0	9.43612	0	0	8.6253	2.14337	0
ENSG00000225241	NBPF8	neuroblastoma breakpoint family, member 8 [Source:HGNC Symbol;Acc:31990]	1	144593363	144621656	5.90874	6.87795	3.74607	0	0	0	0	5.68559	0	0	18.6822	15.4369	0	3.83357	0	0	34.5012	9.058	1.00087
ENSG00000232352	U73167.7		3	50304073	50304803	0	1.41485	0	0	0	0	0	1.33098	0	0	0	11.2026	0	0	0	81.7962	8.6253	0	0
ENSG00000248942	CTD-2275D24.4		5	73602235	73604150	77.1772	0.902423	0.434489	0	0	0	15.0811	0	0	0	0	0	0	2.05822	0	0	0	8.5735	0
ENSG00000237524	AC114783.1		2	127656472	127659673	27.2378	2.30256	3.83389	0	0	0	0	0.298609	10.0577	0	37.3643	0	8.43497	8.85984	0	0	0	4.69515	0.988553
ENSG00000214293	AC090421.1		7	77286977	77325582	7.73601	5.96196	8.3161	0	0	0	15.0811	12.8553	10.0577	0	0	4.23431	7.80543	10.245	0	13.6327	0	0	7.78869
ENSG00000237361	RP11-269C23.3		13	44974487	44980002	25.5815	3.51107	4.84738	0	0	0	0	1.9618	0	0	0	0	0	3.07804	0	13.6327	8.6253	30.676	11.7568
ENSG00000188585	NCRNA00083	non-protein coding RNA 83 [Source:HGNC Symbol;Acc:34521]	1	178463034	178468769	11.5307	5.92073	3.23748	13.2216	0	0	0	1.35296	0	9.27833	18.6822	4.23431	0	11.0436	0	13.6327	0	8.33746	2.99029
ENSG00000250786	CTD-2001E22.2		5	9546312	9550721	4.61384	2.74256	3.38242	0	0	12.0391	0	13.2601	10.0577	0	18.6822	0	8.43497	11.9908	18.2532	0	0	0	0
ENSG00000234689	RP11-279N8.2		13	48479464	48481492	3.21423	0.996159	2.9765	13.2216	0	0	0	4.56933	20.1155	0	18.6822	0	8.43497	0	0	27.2654	0	0	3.85564
ENSG00000182404	RP1-86D1.3		6	128768789	128770446	3.78546	0	0.411165	0	23.3356	0	15.0811	8.28778	0	0	18.6822	0	8.43497	9.48091	0	13.6327	0	0	1.85891
ENSG00000236532	AL035610.2		21	29488413	29600986	4.33093	2.18599	1.46652	13.2216	23.3356	0	15.0811	3.95904	20.1155	0	0	0	7.80543	1.2943	0	0	0	6.89741	2.97381
ENSG00000245521	AL139082.1		13	52703027	52706855	2.85961	0.937051	3.16419	0	0	12.0391	0	5.68797	30.1732	0	0	0	8.43497	7.65055	18.2532	0	8.6253	0	4.73725
ENSG00000223522	AC093690.1		2	28530558	28533326	3.30786	6.6119	1.2508	0	46.6712	0	0	5.21204	10.0577	0	0	0	7.80543	1.89912	0	0	0	0	19.6748
ENSG00000240476	CTD-2021J15.2		3	98699902	98701940	0	0	0.333654	0	0	0	0	6.91344	0	0	0	0	0	0	18.2532	13.6327	51.7518	6.60677	4.7588
ENSG00000251459	RP11-319E12.2		4	58357556	58361399	10.3333	6.37498	0.99009	13.2216	0	0	15.0811	6.45534	20.1155	0	0	0	0	3.24923	0	0	17.2506	4.28675	4.85713
ENSG00000236990	RP11-433J20.1		10	4093918	4131205	3.39065	2.4492	3.80881	0	23.3356	0	15.0811	1.22199	10.0577	18.5467	0	5.6013	0	13.505	0	0	0	2.9228	1.98436
ENSG00000255484	RP11-65M17.1		11	112404945	112426525	9.28448	3.41131	1.03639	0	11.6678	0	15.0811	2.45037	10.0577	0	0	0	0	6.10754	18.2532	13.6327	8.6253	2.20226	0
ENSG00000236436	AC012361.1		2	21059531	21061421	1.09094	4.66561	6.88834	13.2216	11.6678	0	15.0811	1.95499	0	0	0	23.9055	0	9.26574	0	0	8.6253	3.22735	1.98942
ENSG00000232044	AC073479.1		2	6072819	6141407	7.86826	4.63518	2.68283	13.2216	0	0	0	3.78314	20.1155	0	0	0	0	6.52254	18.2532	0	17.2506	5.05123	1.98942
ENSG00000254826	CTD-2530H12.2		11	75486949	75487974	0	0	0	0	0	84.2734	0	0	0	9.26836	0	0	0	0	0	0	0	7.66189	0
ENSG00000224645	RP11-126K1.8		1	151313124	151314442	3.95055	2.71247	17.1072	0	11.6678	0	0	0.582225	0	0	18.6822	11.2026	15.6109	8.15015	0	0	0	6.45469	4.77044
ENSG00000226206	RP5-1050E16.2		9	92501142	92523200	2.84518	9.08291	10.0211	0	0	0	0	4.71592	50.2887	0	0	11.2026	0	5.28643	0	0	0	7.24693	0
ENSG00000234520	AC018464.3		7	112594701	112635689	3.21423	0.937715	2.78744	26.4431	11.6678	0	15.0811	2.515	0	0	0	4.23431	0	6.82335	18.2532	0	0	7.60301	0.98371
ENSG00000233078	RP11-5P18.5		1	16332655	16333166	2.66876	7.82223	0	0	0	0	0	1.48919	0	0	74.7286	0	0	3.25673	0	0	8.6253	0	1.94414
ENSG00000225771	RP4-537K17.2		1	62580420	62584681	3.21423	7.59548	1.99981	26.4431	0	0	0	3.98711	0	9.27833	0	0	16.2404	5.50971	0	13.6327	0	7.5141	4.80324
ENSG00000235831	AC018816.4		3	4938493	5021646	11.351	12.4567	3.27544	13.2216	0	0	0	5.91713	20.1155	9.27833	0	0	7.80543	6.03162	0	0	0	5.83065	4.9261
ENSG00000233554	RP11-326F20.5		9	33166973	33179981	6.71294	1.28663	0.833435	0	0	12.0391	15.0811	7.84345	30.1732	0	0	4.23431	0	7.70836	0	0	0	12.978	0.988553
ENSG00000235706	AL356017.3		14	95624015	95646262	6.66348	1.27533	3.66127	13.2216	0	0	0	11.2505	0	0	0	5.6013	16.2404	17.5783	18.2532	0	0	2.20226	3.82678
ENSG00000237895	RP11-460I13.5		1	28356225	28357423	8.29076	0	3.26831	0	0	12.0391	0	7.11348	0	0	18.6822	0	0	4.4209	18.2532	0	0	17.3439	10.1804
ENSG00000227036	AC007639.1		17	70380443	70588943	7.12616	1.24827	0	0	0	0	0	27.3873	0	0	0	0	0	4.86842	36.5063	13.6327	8.6253	0	0
ENSG00000223414	C6orf176	chromosome 6 open reading frame 176 [Source:HGNC Symbol;Acc:21160]	6	166322290	166401527	2.84518	1.41485	4.31464	0	0	0	0	0.45502	10.0577	0	56.0465	0	0	1.16417	0	0	0	0	22.7569
ENSG00000233008	RP11-475O6.1		1	84041459	84326706	2.85961	0	1.85872	0	0	12.0391	15.0811	6.18234	10.0577	0	18.6822	0	0	4.81183	18.2532	0	0	5.06617	3.9861
ENSG00000230148	RP11-357H14.12		17	46620017	46628610	0	1.86817	0.809924	0	0	0	0	3.41497	40.2309	9.26836	0	19.6712	7.80543	0	0	0	0	10.2501	5.53362
ENSG00000235117	RP11-229P13.20		9	139931492	139932407	14.7978	3.57959	0.825593	13.2216	0	0	0	0.813467	10.0577	0	18.6822	0	16.8699	6.10666	0	0	0	7.67683	5.78188
ENSG00000237753	AC079922.3		2	113399409	113403267	7.45902	2.35181	3.0546	0	0	24.0781	0	6.52744	10.0577	9.27833	0	0	16.2404	5.88242	0	0	8.6253	0	4.84346
ENSG00000183016	IQCA1P1	IQ motif containing with AAA domain 1 pseudogene 1 [Source:HGNC Symbol;Acc:22831]	7	150887960	150902581	4.94428	11.1791	5.06789	0	11.6678	0	0	45.3675	0	9.27833	0	5.6013	0	2.08362	0	0	0	0	3.00048
ENSG00000245685	AF146191.4		4	190701490	190861426	11.6537	4.96767	4.88663	13.2216	0	0	0	4.07288	0	0	18.6822	4.23431	16.2404	7.50134	0	0	0	5.83065	6.85859
ENSG00000234608	C12orf47	chromosome 12 open reading frame 47 [Source:HGNC Symbol;Acc:24091]	12	112277571	112280706	6.54785	10.4256	20.3169	0	0	0	0	3.95535	10.0577	18.5567	0	0	7.80543	1.94071	0	0	0	0	18.4955
ENSG00000225619	AC009232.2		2	2323004	2330882	4.46318	1.24827	1.4067	13.2216	11.6678	0	0	4.22727	20.1155	0	0	0	0	4.14184	36.5063	0	0	0	0.988553
ENSG00000243840	AC108058.1		2	105990550	105992540	11.505	2.64254	14.8339	13.2216	0	0	0	9.47535	0	9.27833	18.6822	0	0	7.58572	0	0	0	7.60301	2.97798
ENSG00000245293	RP11-286E11.1		4	108784635	108899955	8.29076	2.17775	3.27279	0	0	0	0	8.22037	20.1155	9.26836	18.6822	4.23431	7.80543	6.56986	0	0	0	2.55178	6.6078
ENSG00000242086	AC069513.3		3	195415518	195451630	4.06837	0	0.667308	0	0	0	15.0811	5.68205	30.1732	0	0	4.23431	0	3.09279	18.2532	0	8.6253	0	7.87202
ENSG00000226828	RP11-278H7.1		1	244080704	244210619	11.1359	3.24027	2.05803	0	0	36.1172	0	6.50364	0	0	0	0	0	1.67614	18.2532	13.6327	0	5.12505	0
ENSG00000236886	AC007563.5		2	217559187	217858722	2.29971	8.29158	2.07785	0	11.6678	12.0391	0	4.36276	0	0	0	0	0	1.10866	0	0	0	55.8588	0
ENSG00000249464	RP11-93L9.1		4	124571422	124851561	0	4.42141	5.76986	13.2216	11.6678	0	0	9.84038	0	0	0	23.9055	8.43497	4.01368	0	0	0	5.83065	10.5651
ENSG00000244968	MIR3650	microRNA 3650 [Source:HGNC Symbol;Acc:38981]	5	38556888	38671318	2.69451	2.13012	2.3642	0	23.3356	0	0	7.57277	10.0577	9.26836	0	14.0699	0	4.56128	18.2532	0	0	3.22735	0
ENSG00000224259	RP11-48O20.4		1	159931008	159948851	2.29971	0	0	26.4431	0	0	0	4.1118	10.0577	0	0	0	0	0	0	54.5308	0	0	0
ENSG00000185728	YTHDF3	YTH domain family, member 3 [Source:HGNC Symbol;Acc:26465]	8	64081112	64125346	14.8999	4.88383	13.2951	0	11.6678	0	0	2.97789	10.0577	0	0	0	8.43497	2.87818	0	13.6327	8.6253	0	5.89676
ENSG00000253669	KB-1732A1.1		8	103817745	103822199	4.59941	5.44022	4.36961	0	11.6678	0	0	4.03968	50.2887	0	0	0	8.43497	4.30183	0	0	0	2.20226	1.85891
ENSG00000257083	RP11-123O10.3		12	67429288	67490186	2.14904	7.46882	5.06732	0	11.6678	0	0	7.69102	20.1155	0	18.6822	4.23431	8.43497	6.03958	0	0	0	2.55178	2.92042
ENSG00000230962	RP11-113E21.1		10	87209349	87251753	9.06259	0.996159	1.03362	0	35.0034	0	0	0.815286	0	0	18.6822	0	24.6754	4.67365	0	0	0	0	1.98942
ENSG00000254972	RP11-167J8.3		11	71412314	71416450	0.545472	0.902423	2.32802	0	11.6678	24.0781	0	43.2803	0	9.26836	0	0	0	1.94071	0	0	0	2.14337	0
ENSG00000236239	RP4-758J18.9		1	1363502	1365635	9.37437	3.76302	1.48328	0	0	0	0	4.66853	0	0	18.6822	0	0	4.01224	36.5063	13.6327	0	2.90786	0.988553
ENSG00000255272	RP11-646J21.6		11	33797734	33801041	0.545472	10.4639	7.46516	0	0	0	0	4.26363	0	18.5467	0	0	0	10.9727	0	0	0	6.83852	36.7239
ENSG00000225484	RP11-773D16.1		10	81563813	81586350	0	5.60546	1.60308	13.2216	11.6678	0	15.0811	1.25679	0	0	18.6822	0	0	2.84941	0	0	17.2506	4.69515	3.82678
ENSG00000228794	RP11-206L10.11		1	762988	789791	3.7597	7.88298	2.33849	0	11.6678	0	15.0811	3.99463	10.0577	9.26836	0	4.23431	7.80543	6.35245	0	0	0	8.3524	4.81917
ENSG00000249096	RP11-290F5.1		4	185286341	185291024	0	0	0.226462	0	11.6678	0	45.2434	5.35345	0	0	0	0	0	2.5282	0	27.2654	0	2.90786	0
ENSG00000250742	RP11-834C11.4		12	54519882	54526627	6.91355	23.813	6.33405	0	0	0	0	0	0	0	18.6822	0	7.80543	1.16417	18.2532	0	0	10.2071	1.83736
ENSG00000246820	RP11-379P15.1		11	8190714	8200450	7.44459	14.8431	3.43976	0	11.6678	0	0	0.939412	10.0577	0	18.6822	4.23431	0	0.986028	0	0	0	22.514	0
ENSG00000248307	RP11-8P17.1		4	138948576	139051863	1.63641	0	4.249	0	11.6678	0	0	9.22975	10.0577	0	0	0	7.80543	8.08791	18.2532	13.6327	0	2.20226	7.76073
ENSG00000249173	RP11-701P16.4		4	185815025	185820608	9.73632	6.56635	2.16954	0	0	0	0	2.11471	10.0577	9.27833	0	5.6013	0	3.62648	0	27.2654	8.6253	5.45963	3.92382
ENSG00000185433	NCRNA00158	non-protein coding RNA 158 [Source:HGNC Symbol;Acc:1283]	21	26758133	26804013	2.29971	7.29453	4.61127	0	11.6678	0	0	7.42873	10.0577	0	0	0	0	5.21861	18.2532	0	17.2506	8.39737	1.85891
ENSG00000235527	RP5-1073O3.7		1	114466622	114472114	18.9272	6.71239	3.83185	0	11.6678	0	0	15.538	0	0	0	5.6013	16.2404	10.3316	0	0	0	5.47457	0
ENSG00000229153	AC092214.10		7	143104906	143220542	1.09094	3.38425	7.03802	0	11.6678	24.0781	0	6.59044	0	0	0	9.83561	0	8.55921	0	0	17.2506	2.55178	1.85891
ENSG00000226026	RP11-57H12.3		1	95628775	95699538	11.0532	1.24827	0	0	0	0	30.1623	4.91528	0	0	0	9.83561	0	0.964311	0	27.2654	0	6.45469	1.97226
ENSG00000232518	AC074366.3		2	38895830	38898563	12.6181	2.4492	2.35369	0	0	0	0	2.18634	10.0577	9.27833	0	0	0	3.91277	0	27.2654	8.6253	13.6493	1.00087
ENSG00000223910	C10orf44	chromosome 10 open reading frame 44 [Source:HGNC Symbol;Acc:23583]	10	44124265	44170151	6.44712	14.0216	1.52302	52.8863	0	0	0	3.31159	0	0	0	8.46862	0	6.23839	0	0	0	0	0
ENSG00000232903	RP13-137A17.4		10	134757471	134778793	13.7442	2.27149	1.06944	0	0	12.0391	30.1623	9.25316	0	0	0	0	0	15.731	0	0	8.6253	0	0
ENSG00000226995	RP5-828H9.3		20	5412638	5426392	6.74845	5.39021	4.90037	0	0	36.1172	0	4.04372	20.1155	0	0	4.23431	0	4.53673	0	0	0	2.90786	3.88829
ENSG00000239445	RP11-319J24.1		3	98433174	98451495	11.1117	1.93321	14.1486	0	0	0	15.0811	2.12944	0	0	0	0	0	6.50978	0	0	17.2506	10.8968	13.7037
ENSG00000248866	CTD-2314I6.1		4	53525573	53527835	0	0.902423	1.37793	0	11.6678	0	0	1.93127	10.0577	0	0	12.7029	7.80543	6.16629	18.2532	13.6327	0	5.84559	1.98819
ENSG00000251615	RP11-774O3.3		4	8357038	8359103	4.46318	2.50302	0.771835	0	0	0	0	6.51689	0	0	18.6822	0	0	8.68052	0	0	25.8759	8.02635	16.6663
ENSG00000226203	RP4-760C5.5		20	25936448	25949924	6.16747	9.24698	1.85146	0	0	0	15.0811	7.0911	0	0	0	0	0	8.72993	0	0	0	38.9893	4.9261
ENSG00000250267	RP11-122A21.2		8	110310827	110328742	0	3.13214	3.67283	0	0	0	45.2434	3.34936	0	9.27833	0	4.23431	8.43497	1.75363	0	0	8.6253	2.20226	2.00084
ENSG00000224376	AC017104.6		2	232253687	232259702	10.3754	1.99232	2.99416	26.4431	11.6678	0	0	4.44997	0	0	0	9.83561	16.2404	3.97711	0	0	0	2.90786	1.01229
ENSG00000049319	SRD5A2	steroid-5-alpha-reductase, alpha polypeptide 2 (3-oxo-5 alpha-steroid delta 4-dehydrogenase alpha 2) [Source:HGNC Symbol;Acc:11285]	2	31747550	31806136	0	3.27921	1.30586	0	0	0	15.0811	4.64761	0	9.27833	0	0	7.80543	8.52003	18.2532	13.6327	0	9.058	0.98371
ENSG00000226688	RP11-429G19.2		10	97512963	97849995	7.81364	5.76181	4.39702	0	0	0	0	2.37819	0	9.27833	0	5.6013	0	14.8269	0	0	0	5.10355	36.5889
ENSG00000204754	CTC-281M20.1		5	174346085	174422516	5.4569	9.66262	5.29628	13.2216	0	0	0	7.54208	10.0577	0	0	4.23431	8.43497	7.53684	0	0	8.6253	5.45963	5.79297
ENSG00000235477	RP11-122G18.5		1	161337812	161341754	7.92171	0	1.15473	0	0	0	0	5.09356	0	18.5367	18.6822	0	0	9.79403	18.2532	0	8.6253	3.22735	0
ENSG00000233864	TTTY15	testis-specific transcript, Y-linked 15 (non-protein coding) [Source:HGNC Symbol;Acc:18567]	Y	14774265	14804162	1.09094	5.40649	4.34884	26.4431	11.6678	0	0	2.98468	0	0	18.6822	0	0	9.78836	0	0	0	2.20226	8.60067
ENSG00000247271	CTD-2003C8.1		11	10879806	10928349	0	2.07021	2.46747	0	0	0	0	15.7529	20.1155	9.26836	0	0	32.4808	4.17012	0	0	0	0	4.81533
ENSG00000204685	AC012307.3		2	96874154	96908359	8.00449	6.31149	3.93167	13.2216	0	0	0	24.3528	20.1155	0	0	0	0	4.76643	0	0	0	2.55178	7.69037
ENSG00000230551	CTB-89H12.4		5	148872949	148884233	11.0973	7.56423	5.47447	0	11.6678	0	0	6.48873	0	0	0	0	7.80543	0.964311	0	13.6327	8.6253	9.68204	7.8144
ENSG00000247544	AC034110.1		18	74240612	74271783	2.85961	5.64689	7.15471	26.4431	0	0	0	3.76102	0	0	0	4.23431	15.6109	0.9764	0	0	0	19.9989	3.83185
ENSG00000247796	CTD-2366F13.1		5	52405672	52410956	2.85961	3.17391	2.31616	0	11.6678	0	0	11.3979	20.1155	0	0	0	0	13.159	0	0	0	18.8849	6.76673
ENSG00000240908	AC010082.1		7	18127506	18367381	1.09094	6.24136	2.65939	0	0	0	0	3.43572	20.1155	0	0	5.6013	0	0.964311	36.5063	0	8.6253	5.06617	0
ENSG00000226328	CTA-217C2.1		22	45529710	45559662	2.14904	0	0	0	11.6678	12.0391	15.0811	13.1739	10.0577	0	0	0	7.80543	4.64124	0	13.6327	0	0	0
ENSG00000179136	AC005358.1		17	12453286	12540504	7.02544	4.73233	2.90801	13.2216	0	12.0391	0	3.73926	10.0577	0	0	4.23431	0	4.3004	18.2532	0	8.6253	0	1.00087
ENSG00000226808	RP11-168P8.2		10	44354859	44390881	7.70667	1.11618	4.35879	13.2216	0	0	0	30.8019	0	0	0	0	7.80543	14.534	0	0	8.6253	0	1.93671
ENSG00000244342	RP11-129K20.2		3	62936105	63110738	6.58069	5.50298	10.1625	0	0	0	15.0811	11.0286	0	0	0	0	0	10.3197	0	13.6327	8.6253	3.22735	5.92889
ENSG00000232685	RP11-301J16.5		13	19582399	19589338	0	0.937051	1.57374	26.4431	0	0	15.0811	1.57937	0	0	37.3643	0	0	3.25673	0	0	0	0	3.84833
ENSG00000215068	AC025171.1		5	43041677	43045492	10.4365	0	0	0	23.3356	0	0	0.472486	10.0577	0	0	0	0	3.22292	36.5063	0	0	0	5.95414
ENSG00000248411	CTD-2517M14.5		8	145721763	145725663	0	11.048	0	13.2216	58.339	0	0	2.11893	0	0	0	4.23431	0	0.789322	0	0	0	0	0
ENSG00000256448	RP11-809N8.4		11	73116342	73121727	0.545472	3.28886	0.827771	0	0	0	0	8.48846	10.0577	0	56.0465	0	0	2.6527	0	0	0	0	7.82362
ENSG00000247843	AC022916.1		17	33558469	33569346	8.46718	2.35181	1.5261	13.2216	11.6678	0	0	2.50357	0	0	0	5.6013	0	11.8056	18.2532	0	8.6253	2.55178	2.94011
ENSG00000239415	AP001469.9		21	47671463	47674047	4.39881	5.28855	4.7376	13.2216	11.6678	0	15.0811	6.19266	0	0	0	0	8.43497	5.24129	0	0	8.6253	2.55178	3.87207
ENSG00000229160	AC009229.6		2	38359779	38366088	0.545472	1.41409	0	0	11.6678	0	0	3.7916	0	0	0	0	0	0	0	54.5308	17.2506	0	0
ENSG00000235584	AC008268.1		2	96331832	96334010	14.7048	4.63825	2.36005	0	0	0	15.0811	3.5065	0	0	0	14.0699	0	4.74739	0	13.6327	0	11.5059	4.88864
ENSG00000236333	AC087886.1		12	72647288	72668687	12.2198	3.94899	6.1728	0	0	0	0	7.57335	20.1155	0	0	4.23431	0	8.70868	0	13.6327	0	9.68204	2.83823
ENSG00000228150	RP11-84A14.4		1	10002981	10010032	0	4.41489	0.868979	13.2216	11.6678	0	15.0811	6.41244	10.0577	0	0	0	0	15.5301	0	0	0	8.70192	2.93949
ENSG00000226403	RP11-31F19.1		9	547317	549531	2.14904	10.6645	2.45751	0	0	12.0391	0	0.520463	40.2309	0	0	0	0	0	18.2532	0	0	2.55178	0
ENSG00000253331	CTC-207P7.1		5	163546104	163661103	2.69451	3.54421	4.84423	13.2216	35.0034	12.0391	0	1.25183	0	0	0	0	0	5.77614	0	0	0	10.4369	0
ENSG00000223812	RP11-197K6.1		3	191275113	191308145	8.3993	0	1.92957	0	0	0	0	1.59404	20.1155	0	0	9.83561	0	8.16033	36.5063	0	0	2.14337	0
ENSG00000233038	AC011899.9		7	157647221	157658784	2.66876	0	1.47272	0	0	0	15.0811	3.89935	0	0	18.6822	11.2026	0	7.9357	0	0	17.2506	3.22735	6.91322
ENSG00000236753	AC018642.1		7	130994503	131012981	8.06488	16.3739	6.13117	0	0	0	0	8.51807	0	9.26836	0	0	0	4.81579	0	0	8.6253	16.5998	9.63549
ENSG00000233006	AC034220.3		5	131646978	131705608	5.622	6.76307	3.68258	0	11.6678	0	0	4.05402	0	9.27833	0	9.83561	7.80543	7.39016	0	0	8.6253	9.33798	3.94882
ENSG00000236163	RP11-501I18.2		6	42756998	42759057	2.85961	3.43836	2.19656	0	11.6678	0	0	3.88829	0	9.26836	18.6822	0	16.2404	5.91022	0	0	0	5.06617	8.78647
ENSG00000248323	RP11-213H15.3		5	90598846	90610219	0	6.28031	6.81456	0	0	0	0	2.41293	10.0577	0	18.6822	0	0	1.92862	18.2532	0	17.2506	3.22735	2.98523
ENSG00000250740	RP11-710F7.2		4	106848217	106853879	6.61573	1.28663	3.44403	0	0	0	0	44.538	10.0577	0	0	4.23431	7.80543	9.56442	0	0	0	0	0
ENSG00000248846	CTD-2016O11.1		5	65502040	65505275	5.15932	0	1.39355	13.2216	0	0	0	5.29887	0	0	0	0	8.43497	4.49764	18.2532	27.2654	0	2.14337	1.85891
ENSG00000229017	RP11-439L18.3		6	143287561	143358719	0.545472	9.90126	0.450786	0	0	12.0391	0	3.11684	10.0577	9.27833	0	8.46862	8.43497	4.71278	0	0	8.6253	0	11.7444
ENSG00000243150	RP11-538P18.2		3	158263009	158288855	9.51395	3.05371	4.78997	13.2216	11.6678	12.0391	0	5.21015	0	0	0	5.6013	7.80543	7.60682	0	0	0	0	6.78636
ENSG00000233858	AC026904.1		8	49502961	49700220	4.0828	8.67413	5.78088	26.4431	0	0	15.0811	3.02827	0	0	0	4.23431	0	7.0685	0	0	0	5.06617	7.69638
ENSG00000204460	AC079586.1		2	129999746	130031421	7.97476	1.83947	0	0	0	0	15.0811	2.43616	10.0577	0	18.6822	0	0	2.14057	18.2532	0	8.6253	0	1.83736
ENSG00000223482	RP11-322M19.1		10	88963610	89102369	5.07653	3.34797	3.58745	13.2216	0	12.0391	15.0811	3.20168	0	9.27833	0	8.46862	0	3.82634	0	0	0	6.54788	2.97674
ENSG00000249993	RP11-91K8.1		3	133148113	133174620	3.91771	0.996159	0.555601	0	0	0	0	2.665	0	18.5367	0	0	0	0.964311	36.5063	13.6327	8.6253	0	0
ENSG00000198358	RP11-544M22.1		1	160902255	160919712	0	19.8067	6.61173	0	0	0	0	7.19053	0	0	18.6822	0	0	4.3533	18.2532	0	0	4.69515	6.79946
ENSG00000234815	AC097517.1		2	6766241	6774838	2.29971	2.22435	3.80486	0	0	12.0391	0	2.98931	0	0	18.6822	0	15.6109	3.04937	0	0	17.2506	5.4296	2.97313
ENSG00000249684	RP11-423H2.3		5	177377336	177390961	5.33752	0	2.5375	0	0	0	0	6.52855	10.0577	0	18.6822	4.23431	16.8699	2.84754	0	0	17.2506	0	1.93671
ENSG00000245322	RP11-15B17.1		4	100871163	101116256	2.72736	3.20422	1.82954	0	11.6678	0	15.0811	8.82567	0	0	0	0	0	2.55504	18.2532	13.6327	0	2.55178	5.91685
ENSG00000231427	RP11-436F9.1		7	54398390	54417542	0.545472	3.03254	2.20669	0	0	24.0781	0	0	0	0	0	16.8039	0	1.86338	36.5063	0	0	0	1.01229
ENSG00000249628	RP3-340I3.1		12	1609691	1616484	10.4511	5.88727	7.02061	0	0	12.0391	0	5.16329	0	0	0	8.46862	0	11.4744	0	0	17.2506	6.43012	1.85891
ENSG00000245164	RP11-622O11.2		8	126934552	126963493	2.29971	4.58053	0.411165	0	23.3356	0	0	0.760819	0	0	0	0	0	0	0	0	0	0	54.6448
ENSG00000244791	RP11-65D17.1		8	127337740	127341780	7.06756	3.18639	3.86724	0	0	0	0	4.23115	0	0	0	8.46862	0	11.376	0	40.8981	0	0	6.8852
ENSG00000236269	RP3-477M7.2		1	8935847	8938066	5.07653	0.937051	0.329139	0	23.3356	0	0	3.1173	10.0577	0	18.6822	0	0	0	0	0	8.6253	7.98138	7.79505
ENSG00000249707	AC024592.1		19	5836244	5839733	0.545472	6.91773	3.24652	0	0	0	15.0811	40.9117	0	0	0	0	7.80543	3.61685	0	0	0	5.83065	1.92782
ENSG00000251511	RP11-171N4.1		4	157507131	157511191	4.44875	2.3915	7.28613	0	0	0	0	3.05407	0	0	37.3643	0	0	6.79095	0	13.6327	8.6253	2.14337	0
ENSG00000256802	AC022613.1		15	29967194	29971367	4.8764	4.6928	3.04358	13.2216	0	0	0	3.36826	10.0577	0	18.6822	5.6013	0	1.77535	0	13.6327	0	5.77912	1.00087
ENSG00000223563	AP001601.2		21	28261695	28312061	5.14489	4.19137	4.56477	13.2216	11.6678	12.0391	0	3.19855	10.0577	0	0	0	8.43497	6.34979	0	0	0	0	6.81494
ENSG00000253522	CTC-231O11.1	microRNA 146a (MIR146A), microRNA [Source:RefSeq DNA;Acc:NR_029701]	5	159895275	159914433	5.69036	6.02507	3.99556	0	0	0	0	5.45934	0	0	0	0	8.43497	3.91523	0	13.6327	17.2506	7.61795	13.638
ENSG00000254815	RP11-496I9.1		11	557595	560107	6.03522	0.937715	4.28795	0	0	0	0	26.4149	30.1732	0	0	0	8.43497	2.40296	0	0	0	5.06617	1.85891
ENSG00000248318	RP11-713M15.1		8	121773493	121789072	5.42187	5.30184	10.3782	0	11.6678	0	0	3.84139	0	0	0	4.23431	0	2.24386	18.2532	13.6327	0	4.69515	5.89676
ENSG00000233002	AC005324.6		17	15638337	15647113	3.23998	0	5.88082	13.2216	11.6678	0	0	4.11739	10.0577	9.27833	0	11.2026	0	5.90942	0	0	0	6.83852	3.9249
ENSG00000230212	AP000688.14		21	37441940	37498938	4.44875	6.01442	9.12741	0	23.3356	0	0	11.3132	0	0	0	9.83561	7.80543	10.1314	0	0	0	0	2.95665
ENSG00000235092	AC011747.7		2	8806766	8821993	2.69451	7.5879	1.06591	0	11.6678	0	30.1623	2.25005	10.0577	0	0	0	0	11.3334	0	0	0	5.12505	2.98455
ENSG00000245213	RP11-10K16.1		4	174053079	174090803	0	7.97587	1.56807	39.6647	0	0	0	3.72584	0	0	18.6822	0	0	10.0167	0	0	0	3.22735	0
ENSG00000225914	XXbac-BPG154L12.4		6	32223488	32233615	5.51394	3.13214	4.20594	39.6647	0	0	0	1.52088	0	0	0	0	0	10.1611	0	13.6327	0	2.9228	3.99116
ENSG00000246859	CTC-426B10.1		5	110847924	111075423	12.7373	8.44527	13.6921	0	0	0	0	1.39745	0	9.26836	18.6822	0	0	10.3154	0	0	0	2.20226	7.90418
ENSG00000233894	RP4-650F12.2		1	74933879	74935227	0	6.27926	2.19579	0	0	0	0	2.08301	10.0577	0	18.6822	12.7029	0	14.5972	0	0	8.6253	2.90786	6.50062
ENSG00000234883	MIR155HG	MIR155 host gene (non-protein coding) [Source:HGNC Symbol;Acc:35460]	21	26934221	26947480	1.76867	13.1215	0	0	0	0	0	4.30204	0	0	0	0	0	0.964311	18.2532	13.6327	17.2506	2.55178	12.6369
ENSG00000241684	CTD-2230D16.1		3	64670585	64997143	12.2027	9.84432	4.82506	0	0	12.0391	0	6.98364	10.0577	0	0	0	0	1.92596	0	0	17.2506	7.26843	1.92782
ENSG00000236057	AC006262.1		19	46706683	46718095	2.66876	8.89018	0.411165	0	0	12.0391	0	1.12348	0	9.27833	18.6822	9.83561	8.43497	3.49251	0	0	0	7.57298	1.85891
ENSG00000249116	CTD-2194D22.3		5	1884080	1884763	0	3.78965	0	0	0	60.1953	0	0	0	9.27833	0	0	8.43497	0	0	0	0	2.55178	0
ENSG00000225213	RP11-197M22.2		10	16763436	16765207	1.09094	0	0	13.2216	11.6678	0	0	1.21013	10.0577	0	0	5.6013	0	1.9528	36.5063	0	0	2.90786	0
ENSG00000250156	CTC-498M16.2		5	87705664	87794514	3.21423	17.383	0.226462	39.6647	0	0	0	2.57248	0	0	0	0	0	0	0	13.6327	0	6.45469	0.972072
ENSG00000254980	RP11-794P6.6		11	111384768	111397480	7.73601	4.65372	2.83727	13.2216	0	0	15.0811	2.93046	0	9.26836	0	8.46862	7.80543	5.02245	0	0	0	2.20226	4.74614
ENSG00000229056	AC020571.3		2	197124748	197128928	9.99553	8.89788	6.99835	13.2216	0	0	0	2.44153	0	9.27833	0	4.23431	0	7.97106	0	0	17.2506	2.55178	0.972072
ENSG00000233058	AC046143.7		3	194208183	194239008	13.5897	0	1.4149	0	23.3356	0	0	3.95638	0	0	0	5.6013	0	5.78893	18.2532	0	8.6253	3.22735	0
ENSG00000251391	RP11-305P14.1		5	65492117	65867801	9.6871	1.24827	1.75222	0	11.6678	0	0	1.38768	10.0577	0	0	12.7029	0	4.33039	18.2532	0	8.6253	2.20226	1.85891
ENSG00000226017	RP11-129B22.7		3	64173220	64186641	7.24398	4.79512	2.90909	26.4431	0	0	0	7.55477	0	0	0	0	7.80543	9.40829	0	0	0	7.9225	9.66611
ENSG00000243952	RP11-392M18.5		20	30822717	30824519	7.60594	0	3.80331	0	11.6678	0	0	4.86794	0	9.26836	0	11.2026	8.43497	2.66216	0	13.6327	8.6253	0	1.93671
ENSG00000234944	RP11-124O11.1		10	43366969	43369508	0	0	0	52.8863	11.6678	0	0	0.939412	0	0	0	0	0	1.16417	0	0	0	0	16.9817
ENSG00000241475	RP4-781K5.5		1	234796017	234802850	0.545472	3.45204	5.72199	0	11.6678	0	0	2.034	10.0577	9.27833	0	5.6013	0	0	18.2532	13.6327	0	2.14337	0.98371
ENSG00000247363	RP11-637A17.2		12	69068151	69081535	19.2011	0	0	0	11.6678	0	0	2.88273	0	9.27833	0	0	0	8.27814	18.2532	13.6327	0	0	0
ENSG00000215808	RP11-371I1.2		1	238643684	238649323	4.59941	3.4843	1.4269	0	0	0	0	0	10.0577	0	18.6822	4.23431	0	0.986028	36.5063	0	0	2.9228	0
ENSG00000227953	RP11-439E19.3		1	246939315	246955687	8.76477	1.87477	1.63712	0	0	0	0	8.36844	0	9.26836	0	14.0699	25.3049	6.77316	0	0	0	0	6.71183
ENSG00000223358	RP11-29A1.3		3	184880659	184909743	0.545472	1.83651	1.19561	13.2216	11.6678	0	0	5.23153	0	0	18.6822	4.23431	0	4.60304	0	0	8.6253	3.22735	9.65959
ENSG00000233304	RP13-614K11.1		1	4000673	4015322	0	15.1623	0.885393	13.2216	11.6678	0	0	1.4514	0	0	37.3643	0	0	0	0	0	0	2.90786	0
ENSG00000224046	AC005076.5		7	86780739	86781736	0.545472	1.41409	1.71363	0	0	12.0391	0	5.05145	50.2887	0	0	0	0	2.87552	0	0	8.6253	0	0
ENSG00000205054	AC009236.1		2	45392009	45550434	6.54785	5.55769	1.15071	0	0	0	0	2.3851	0	0	0	5.6013	7.80543	2.73966	36.5063	0	0	9.36255	4.74614
ENSG00000231605	RP11-277B15.2		1	167145154	167165029	1.09094	3.0384	0.677248	13.2216	0	12.0391	15.0811	7.0522	10.0577	0	0	0	0	8.84461	0	0	0	4.40451	6.8123
ENSG00000237585	RP11-442J21.1		13	45225948	45275152	2.29971	0	0.226462	0	0	24.0781	0	0	0	55.6301	0	0	0	0	0	0	0	0	0
ENSG00000187156	NCRNA00221	non-protein coding RNA 221 [Source:HGNC Symbol;Acc:20169]	14	106938445	106977000	0	4.64567	2.9463	0	0	0	0	5.43041	0	0	18.6822	0	15.6109	8.01619	18.2532	0	8.6253	0	0
ENSG00000204466	DGKK	diacylglycerol kinase, kappa [Source:HGNC Symbol;Acc:32395]	X	50108408	50213737	7.63879	0.996159	9.28661	0	0	0	0	4.43495	20.1155	0	0	4.23431	8.43497	5.26157	0	13.6327	0	2.20226	5.90587
ENSG00000237853	RP5-833A20.1		1	61714617	61719182	5.38902	0	1.10549	0	0	0	0	0.480446	50.2887	0	18.6822	4.23431	0	1.91387	0	0	0	0	0
ENSG00000224086	LL22NC03-86G7.1		22	22292609	22297799	12.969	1.24827	2.8079	0	0	0	0	2.67467	10.0577	0	18.6822	0	8.43497	4.02433	18.2532	0	0	0	2.9327
ENSG00000254231	CTD-2284J15.1		8	87345503	87355543	2.66876	3.44074	0.416605	0	11.6678	0	0	2.2223	10.0577	0	0	0	15.6109	1.95034	18.2532	13.6327	0	2.14337	0
ENSG00000196668	NCRNA00173	non-protein coding RNA 173 [Source:HGNC Symbol;Acc:33791]	12	116971227	116974323	10.5905	2.41101	4.20069	0	0	0	0	2.76816	0	0	37.3643	0	0	5.46703	0	0	0	9.058	9.89974
ENSG00000227718	AC016730.1		2	13863173	13898277	5.58697	3.79758	0.771835	0	0	12.0391	0	7.46919	0	0	18.6822	0	0	13.8401	0	0	8.6253	8.02635	2.90878
ENSG00000251095	RP11-115D19.1		4	90472507	90647654	9.82996	1.2277	0	0	0	0	0	2.9154	0	0	37.3643	0	0	8.97708	0	13.6327	0	5.83065	1.93671
ENSG00000100101	NOL12	nucleolar protein 12 [Source:HGNC Symbol;Acc:28585]	22	38082421	38170137	0.545472	4.15665	2.6304	0	0	0	15.0811	0	0	0	18.6822	5.6013	8.43497	0.986028	18.2532	0	0	7.30581	0
ENSG00000228630	HOTAIR	HOX transcript antisense RNA (non-protein coding) [Source:HGNC Symbol;Acc:33510]	12	54356092	54368740	0	2.81052	6.25258	0	11.6678	12.0391	0	3.93513	10.0577	0	18.6822	4.23431	7.80543	4.01368	0	0	0	0	0
ENSG00000245208	AC103876.1		15	83876655	83896949	3.23998	1.24827	9.06291	0	11.6678	0	0	11.1552	0	0	0	15.4369	0	14.3785	0	0	8.6253	0	6.63576
ENSG00000227061	AC079779.7		2	197569	202605	3.53733	0.937051	1.21054	0	11.6678	0	0	3.98538	0	0	0	0	24.6754	0.964311	0	0	8.6253	2.14337	23.3892
ENSG00000256413	AL390763.1		10	130084199	130115983	0	0.902423	1.29656	0	0	0	0	0	30.1732	0	18.6822	5.6013	0	1.95349	0	0	17.2506	4.28675	0.972072
ENSG00000246790	RP11-730K11.1		11	121318040	121323722	11.1359	6.39431	4.39731	0	0	0	0	8.45295	0	9.27833	0	0	0	8.23857	18.2532	0	0	5.05123	9.88219
ENSG00000243069	RP11-217E22.2		3	153742190	153839121	8.15141	0	0.450786	0	0	12.0391	0	16.5286	0	0	0	4.23431	0	2.9292	36.5063	0	0	0	0
ENSG00000251450	CTC-459I6.1		5	80243516	80256726	1.09094	7.46905	3.92797	0	0	0	0	0.6753	0	9.26836	18.6822	0	0	0	18.2532	13.6327	0	6.83852	0.988553
ENSG00000237505	RP11-76N22.2		1	89003196	89150887	0	3.75797	1.18131	0	0	24.0781	0	2.98345	0	0	18.6822	0	7.80543	1.89798	0	0	0	0	20.3082
ENSG00000248008	RP11-18C24.6		12	120928131	120933743	3.23998	3.21687	1.23273	0	0	0	0	24.329	0	0	0	12.7029	8.43497	7.07185	18.2532	0	0	0	2.01316
ENSG00000253469	CTC-264O10.1		5	166591939	166595406	0.545472	3.06783	0.333654	0	0	0	30.1623	3.71296	0	0	0	0	16.8699	2.32834	0	13.6327	8.6253	0	1.01229
ENSG00000236197	AC002429.5		7	94784517	94843644	12.2377	8.29423	3.75292	0	0	0	0	11.4949	20.1155	0	0	4.23431	0	8.44523	0	0	0	6.83852	4.67559
ENSG00000236383	AC109326.1		17	41368960	41381062	3.91771	1.93024	0.452924	0	0	0	15.0811	0	50.2887	0	0	0	0	5.14406	0	0	0	2.20226	0.988553
ENSG00000241836	AC073321.5		2	217364673	217394207	3.27283	11.7615	36.3176	0	0	0	0	0.363365	0	0	0	0	7.80543	0	18.2532	0	0	0	2.00084
ENSG00000256299	RP11-989F5.3		12	131295366	131297167	0	0	0	13.2216	0	0	0	1.08121	0	0	56.0465	0	0	6.42995	0	0	0	0	2.84746
ENSG00000228449	RP11-177A2.4		1	179070798	179074885	0	24.2217	9.05019	0	11.6678	0	0	1.6077	0	0	0	0	0	3.7971	0	0	0	11.5582	17.4865
ENSG00000231418	AC006380.3		7	31454259	31460900	11.4413	0	0.555601	0	23.3356	12.0391	15.0811	0.969437	0	0	0	4.23431	0	3.87876	0	0	0	5.47457	1.96062
ENSG00000234380	AP000330.8		21	36118054	36157183	9.2237	0	2.37248	0	11.6678	0	15.0811	0.989446	0	9.26836	0	4.23431	8.43497	9.01356	0	0	8.6253	0	0
ENSG00000237438	CECR7	cat eye syndrome chromosome region, candidate 7 (non-protein coding) [Source:HGNC Symbol;Acc:1845]	22	17517460	17539682	12.2624	8.04865	3.30298	26.4431	0	0	0	2.20116	0	0	0	4.23431	0	4.81623	0	0	0	8.70192	8.7741
ENSG00000253967	RP11-333A23.4		8	71383369	71397922	1.76867	1.27533	0.434489	0	23.3356	12.0391	0	0.464916	0	0	0	0	0	6.49286	18.2532	13.6327	0	0	0.972072
ENSG00000247614	AC119673.1		1	205685228	205719310	4.43742	1.41409	1.27852	0	0	0	0	11.4251	0	9.26836	0	0	8.43497	10.5068	0	0	25.8759	2.20226	3.78673
ENSG00000215866	RP11-426L16.8		1	113362792	113393265	1.76867	0	44.6488	0	0	0	15.0811	0	0	9.26836	0	0	0	5.43589	0	0	0	0	1.85891
ENSG00000230133	RP5-1100I6.2		20	24180403	24205224	7.80389	1.24827	5.7985	13.2216	0	0	0	3.97584	0	0	0	8.46862	0	6.71421	0	13.6327	0	11.2453	5.88951
ENSG00000248940	AL031123.2		6	6695027	6700720	3.27283	6.99818	11.8095	0	0	0	0	4.41423	0	0	0	0	16.2404	5.43761	0	0	8.6253	18.1031	2.91153
ENSG00000198468	NCRNA00292	non-protein coding RNA 292 [Source:HGNC Symbol;Acc:39077]	1	213025450	213031430	2.29971	1.28663	21.0612	0	0	24.0781	0	3.3866	0	0	0	5.6013	0	6.48661	0	0	0	12.5899	0.98371
ENSG00000230615	RP5-1198O20.4		1	44509600	44570647	3.30786	5.29891	4.80219	0	11.6678	0	15.0811	3.25224	0	0	18.6822	0	0	0	0	0	0	2.90786	12.6672
ENSG00000223797	RP11-391M1.3		3	40355293	40494820	5.69036	1.03511	1.19154	0	0	0	15.0811	6.13128	0	18.5367	0	0	0	4.17195	0	0	0	9.77523	15.4091
ENSG00000247645	AC034110.2		18	74327169	74337889	1.09094	2.23235	2.35294	0	0	0	30.1623	1.62292	0	0	0	0	0	5.60625	0	0	25.8759	2.20226	5.86807
ENSG00000230229	RP11-90J7.4		10	80112354	80115857	0.545472	0	1.26691	0	11.6678	12.0391	0	1.27605	10.0577	0	0	4.23431	0	4.2121	0	0	25.8759	4.69515	0.972072
ENSG00000256813	RP11-804A23.4		11	60609279	60618554	1.76867	7.6683	2.69894	13.2216	11.6678	24.0781	0	2.11301	0	0	0	0	0	5.98377	0	0	0	2.55178	4.94462
ENSG00000233746	RP4-737E23.4		20	23105705	23113258	4.33093	4.34539	4.69722	0	0	0	0	5.35507	0	18.5467	18.6822	5.6013	0	1.95349	0	0	0	9.3903	3.71782
ENSG00000253661	RP11-65D13.1		8	77403435	77595513	12.6822	4.46113	5.72869	0	0	12.0391	0	9.35444	10.0577	0	0	4.23431	7.80543	2.07297	0	0	0	6.1352	1.94414
ENSG00000237484	AP000476.1		21	25801054	25920256	3.39065	5.84892	4.56388	0	0	12.0391	0	6.67326	0	9.26836	0	4.23431	8.43497	11.1474	0	0	0	3.22735	7.65795
ENSG00000163364	AC017048.3		2	177494568	177502659	4.8178	18.8023	0.442697	0	0	0	0	0	20.1155	0	0	0	0	0	0	13.6327	0	18.5511	0
ENSG00000186530	XKR5	XK, Kell blood group complex subunit-related family, member 5 [Source:HGNC Symbol;Acc:20782]	8	6666038	6693166	2.31414	4.05778	7.87112	13.2216	0	12.0391	0	1.58231	10.0577	0	0	0	8.43497	2.32834	0	0	0	4.75403	9.60828
ENSG00000253302	RP11-181D18.2		8	74332239	74353761	9.4574	2.69018	3.00861	0	0	0	0	0.833946	0	0	0	0	0	0.949559	54.7595	0	0	4.40451	0
ENSG00000236404	RP11-125B21.2		9	2422702	2622373	0.545472	2.5236	3.00345	0	0	0	0	3.64393	10.0577	9.26836	18.6822	0	24.0458	1.10866	0	0	0	2.20226	1.00087
ENSG00000232229	RP11-248C1.2		10	91589267	91600618	0.545472	2.2628	5.22982	13.2216	0	0	0	4.70441	10.0577	0	0	4.23431	0	1.67614	18.2532	0	8.6253	3.22735	3.96894
ENSG00000253373	RP11-21C17.1		8	70087814	70090424	0	2.22072	8.27914	0	0	0	0	6.36497	10.0577	0	0	4.23431	7.80543	4.95944	0	13.6327	0	5.77912	12.3949
ENSG00000185495	RP11-504P24.4		1	224183659	224198309	4.8178	0	4.25131	0	11.6678	24.0781	0	11.6993	0	0	0	4.23431	8.43497	4.57604	0	0	0	0	1.93671
ENSG00000254452	RP11-867G23.4		11	66044250	66044963	2.14904	0.937715	4.43278	0	0	12.0391	0	12.3701	0	0	18.6822	0	7.80543	7.22687	0	0	0	4.28675	5.70601
ENSG00000229152	ANKRD10-IT1	ANKRD10 intronic transcript 1 (non-protein coding) [Source:HGNC Symbol;Acc:39891]	13	111547406	111551519	0	0.887708	0.450786	0	0	0	15.0811	0.974244	0	0	0	9.83561	0	1.92596	0	27.2654	17.2506	0	1.96062
ENSG00000254233	RP11-242J7.1		4	185505247	185546184	7.70667	10.1503	0.822331	13.2216	23.3356	0	0	2.30055	0	0	0	0	0	2.82769	0	0	0	15.2583	0
ENSG00000230368	FAM41C	family with sequence similarity 41, member C [Source:HGNC Symbol;Acc:27635]	1	803451	812283	2.72736	0.902423	5.50962	13.2216	0	0	0	6.30031	20.1155	0	0	4.23431	0	13.8543	0	0	0	6.89741	1.85891
ENSG00000227964	RP5-1112F19.2		20	50448336	50479451	1.09094	4.72144	0	0	0	0	0	0.268018	0	0	0	0	23.4163	1.86338	0	0	17.2506	8.39737	18.4328
ENSG00000249568	RP11-234O6.2		4	162300105	162309569	2.69451	5.64573	5.15727	0	23.3356	0	0	4.20732	0	0	0	0	0	3.86933	18.2532	0	0	2.55178	9.59809
ENSG00000257067	AP000797.4		11	115803492	115813713	2.85961	0.996159	3.41223	13.2216	0	12.0391	0	0.44827	0	27.815	0	0	0	10.2866	0	0	0	2.20226	1.95578
ENSG00000251652	RP11-20I20.2		4	1107427	1126765	2.14904	0	0.226462	0	11.6678	12.0391	0	0.363365	10.0577	27.8051	0	5.6013	0	5.10591	0	0	0	0	0
ENSG00000234222	RP11-315I20.1		1	145486272	145508262	9.41721	2.11233	2.79834	0	11.6678	0	0	3.63436	0	0	18.6822	0	0	3.75976	0	13.6327	0	8.3309	0.972072
ENSG00000246675	AL512641.1		10	18941165	18943952	8.03203	7.98646	7.3219	26.4431	0	0	0	5.39078	10.0577	0	0	0	0	3.84946	0	0	0	2.90786	2.98455
ENSG00000228262	AC073218.2		2	34902646	34963298	3.95055	0.937715	3.71569	13.2216	0	12.0391	0	2.24625	10.0577	9.27833	0	0	0	7.67442	0	0	0	2.14337	9.70886
ENSG00000230542	NCRNA00102	non-protein coding RNA 102 [Source:HGNC Symbol;Acc:30470]	X	2531029	2533388	7.24398	0	0.555601	0	11.6678	0	0	5.98077	0	0	0	4.23431	7.80543	8.68027	0	0	0	14.8887	13.7167
ENSG00000225255	LA16c-83F12.6		22	16199666	16231333	0	0	0.404962	0	0	0	0	0.525975	0	0	0	0	72.767	0.986028	0	0	0	0	0
ENSG00000234787	RP11-168P6.1		13	54689924	54707001	0	0.996159	44.7342	13.2216	0	0	0	1.83852	0	0	0	5.6013	0	5.33072	0	0	0	0	2.96081
ENSG00000236790	NCRNA00299	non-protein coding RNA 299 [Source:HGNC Symbol;Acc:27940]	2	8147901	8523751	0	0	2.96086	26.4431	0	0	0	1.64636	0	0	0	4.23431	0	2.25861	18.2532	13.6327	0	2.14337	2.96026
ENSG00000228741	RP11-309I15.1		13	24553949	24608145	0.545472	6.45187	3.87227	0	0	0	0	5.0637	0	9.26836	0	5.6013	8.43497	6.03982	0	0	17.2506	4.28675	7.62009
ENSG00000249364	RP11-434D9.1		5	66675206	67101066	0	45.8897	0	0	0	0	0	0	0	0	0	0	0	0	0	0	0	16.7947	11.7185
ENSG00000248839	RP11-227H4.5		3	98241414	98244178	0	5.92123	4.35232	0	0	0	0	1.96877	0	0	0	0	0	3.84249	0	0	0	12.2704	46.0145
ENSG00000250406	RP13-539F13.3		4	145772724	145795939	26.1042	0.934085	2.50114	0	0	0	0	5.54975	0	0	0	0	0	14.1376	18.2532	0	0	5.84559	0.98371
ENSG00000256151	RP11-76C10.5		12	131474683	131478521	2.66876	3.4905	1.37173	0	11.6678	24.0781	0	3.31414	0	0	0	0	0	3.09279	0	13.6327	0	10.8819	0
ENSG00000235770	AC122136.1		2	216476286	216708445	2.18189	1.97282	34.1465	0	0	0	0	3.06879	20.1155	0	0	0	0	6.95437	0	0	0	0	5.71821
ENSG00000224189	AC009336.23		2	177037923	177053686	2.66876	0.902423	0	0	0	0	0	0	30.1732	0	0	0	0	0	36.5063	0	0	2.90786	0.988553
ENSG00000234828	RP11-526A4.1		4	150273169	150817385	0	3.68944	1.29379	0	0	24.0781	0	0.45502	0	18.5367	0	0	0	4.14332	18.2532	0	0	2.55178	1.00087
ENSG00000232170	GS1-756B1.2		10	8301294	8310268	0	0	0.745744	13.2216	11.6678	0	0	7.17005	10.0577	0	0	0	0	3.2471	18.2532	0	8.6253	0	0.98371
ENSG00000250121	AC017116.1		7	44059560	44065967	0	0	0	0	0	0	0	3.062	0	0	37.3643	5.6013	0	1.73888	18.2532	0	0	0	7.83242
ENSG00000229180	GS1-124K5.11		7	65993425	66007536	4.59941	3.12006	0.428473	0	0	0	0	4.43731	0	0	18.6822	0	8.43497	4.32146	0	0	25.8759	0	3.95005
ENSG00000255233	RP11-755E23.3		11	92973299	92974334	0	14.0828	6.94705	0	11.6678	0	0	4.07496	10.0577	0	0	0	0	5.6203	0	0	17.2506	0	3.9653
ENSG00000256994	RP11-871F6.3		12	17662287	17742926	0	0	37.0649	0	0	0	0	2.29226	0	0	0	14.0699	0	1.96243	18.2532	0	0	0	0
ENSG00000227729	AL136001.4		14	104406763	104407776	0	0	0.654935	13.2216	0	24.0781	0	0.76323	0	0	0	0	0	14.6392	18.2532	0	0	0	1.98819
ENSG00000224028	AC073928.2		2	140861152	140889349	9.84486	3.10075	18.5349	0	0	0	0	0.842531	0	0	0	0	0	5.85417	18.2532	0	0	17.126	0
ENSG00000250986	AC141928.1		4	3760475	3765117	14.3759	5.32922	2.14566	0	0	0	0	0.748464	10.0577	0	0	4.23431	0	7.66017	18.2532	0	0	0	10.7339
ENSG00000225982	RP11-538D16.3		1	182055686	182059247	0	0	0	39.6647	0	0	0	0.661973	0	0	0	0	0	14.907	18.2532	0	0	0	0
ENSG00000206029	AC116904.1		18	72259030	72265071	1.63641	0	1.82969	0	0	0	0	7.13683	0	0	18.6822	4.23431	7.80543	6.48493	0	0	8.6253	16.0153	0.988553
ENSG00000232512	AP000233.2		21	26467335	26475983	1.09094	3.10009	8.28195	0	0	0	0	5.32572	0	0	0	4.23431	0	11.3529	0	0	25.8759	6.489	7.67245
ENSG00000250125	RP11-707A18.1		4	65779999	65870218	8.29076	2.4492	0	0	11.6678	12.0391	0	3.17087	0	0	0	0	0	6.49123	18.2532	0	8.6253	2.20226	0
ENSG00000234962	RP11-69C17.1		10	2047667	2056542	11.3656	0	4.8644	0	0	0	0	16.999	20.1155	0	0	0	7.80543	11.0164	0	0	0	0	0.988553
ENSG00000248240	RP11-159F24.5		5	43515376	43525412	13.8098	3.56554	2.9945	0	0	0	15.0811	4.51306	0	0	18.6822	0	0	7.04659	0	0	0	5.45963	1.98458
ENSG00000247445	AP001318.3		11	126210853	126225482	0	0.934085	0	0	11.6678	0	60.3245	0	0	0	0	0	0	0	0	0	0	0	0
ENSG00000225442	AC079111.1		17	16979352	16980672	11.9532	1.2277	0.816127	0	0	0	0	5.23474	0	0	0	0	0	0.964311	36.5063	0	0	10.8968	4.93252
ENSG00000250433	RP11-13L2.2		3	140224453	140227631	45.0578	0.902423	0.599131	0	0	0	0	2.35914	0	0	0	0	0	0.964311	18.2532	0	0	2.14337	2.00084
ENSG00000253357	CTB-78F1.2		5	167148368	167156129	0	5.08125	4.05517	0	0	0	15.0811	3.17437	20.1155	0	0	0	7.80543	3.20335	0	0	0	5.11011	8.50552
ENSG00000250388	AC004510.1		19	15940172	15946228	2.69451	0	3.84611	0	0	0	0	0.799466	0	9.26836	37.3643	8.46862	0	2.7848	0	0	0	0	6.82343
ENSG00000249837	CTD-2325B11.1		4	125070532	125173199	6.07384	0	7.81037	0	11.6678	0	0	0.507833	0	0	0	0	0	9.39279	36.5063	0	0	0	0
ENSG00000254695	RP11-396O20.1		11	15665431	15726914	0.545472	0	0	0	0	12.0391	15.0811	1.32901	0	0	0	0	0	1.89798	36.5063	0	0	2.55178	1.98819
ENSG00000255031	RP11-802E16.3		11	67818207	67821229	3.78546	0	9.22476	0	11.6678	0	0	2.36065	10.0577	0	0	0	0	8.56567	0	13.6327	0	5.77912	6.851
ENSG00000247699	CTB-127C13.1		5	159622751	159631833	6.11801	6.20415	5.22753	0	0	0	0	2.23074	0	0	0	0	24.0458	2.65254	0	0	0	15.6509	9.72917
ENSG00000230908	XXyac-YX60D10.1		20	23778778	23786300	0	0	1.07756	0	0	12.0391	0	0.924726	0	37.1034	0	5.6013	0	0.9764	0	0	8.6253	2.55178	2.9327
ENSG00000224511	RP11-629E24.1		13	30677315	30683012	6.51281	0	3.00336	0	0	0	0	5.37478	0	0	0	5.6013	8.43497	10.9321	18.2532	13.6327	0	0	0
ENSG00000230448	NCRNA00276	non-protein coding RNA 276 [Source:HGNC Symbol;Acc:38663]	2	13850656	14541087	11.0423	7.87601	3.24114	0	0	0	0	4.57529	10.0577	9.26836	0	0	0	0.986028	0	0	0	15.6667	8.75672
ENSG00000249756	AC010615.2		19	21634858	21646686	4.39881	2.66236	5.95094	0	0	0	0	3.84523	10.0577	0	37.3643	0	0	6.15662	0	0	0	0	1.01229
ENSG00000246067	RP11-113K21.5		11	82783108	82817761	10.8959	0	0.83321	0	11.6678	0	0	4.23884	30.1732	0	0	0	0	4.03028	0	0	8.6253	0	0.972072
ENSG00000250241	RP11-9G1.3		4	133996466	134070271	8.84755	1.28663	4.67528	0	0	0	0	4.16892	20.1155	9.26836	0	4.23431	0	6.99804	0	0	8.6253	2.20226	0.988553
ENSG00000251311	RP11-249M12.2		5	116078687	116097905	1.09094	1.41485	0.660951	0	0	0	0	2.46512	0	9.27833	37.3643	0	0	4.70315	0	0	0	10.5258	3.86453
ENSG00000228363	AC015971.2		2	86789198	86845889	0	7.99209	0	0	0	12.0391	0	0.497911	40.2309	0	0	0	8.43497	2.12848	0	0	0	0	0
ENSG00000234638	AC053503.6		2	220289793	220290906	5.14489	0	0.226462	0	0	48.1562	0	0.928233	0	0	0	0	0	0	0	0	0	2.14337	14.5454
ENSG00000253298	AC008703.1		5	158875564	158893284	0.545472	5.75029	60.8319	0	0	0	0	0.661973	0	0	0	0	0	0.986028	0	0	0	2.20226	0
ENSG00000226722	RP11-107B1.1		13	22446909	22450817	2.14904	0.996159	4.13095	13.2216	0	0	0	1.46132	10.0577	0	18.6822	0	7.80543	2.81294	0	0	0	2.14337	7.49425
ENSG00000230952	AC099344.2		2	11497641	11505762	2.72736	0	0.851095	26.4431	0	0	0	0.472486	0	0	18.6822	0	0	6.09864	0	0	8.6253	5.10355	1.93671
ENSG00000246990	AC022031.1		18	53443958	53448952	3.30786	0.887708	1.62622	26.4431	0	0	0	4.54924	0	0	0	0	0	2.12848	18.2532	13.6327	0	0	0
ENSG00000253741	CTD-2292P10.4		8	143783670	143808391	0.545472	2.47597	0	0	11.6678	12.0391	15.0811	2.69988	0	18.5567	0	5.6013	0	1.16417	0	0	0	0	0.988553
ENSG00000234869	RP3-439F8.1		22	46937392	46944093	0.545472	5.03703	3.48105	26.4431	0	0	0	6.68655	0	0	0	0	7.80543	0.9764	0	0	0	6.1352	13.5003
ENSG00000236092	RP11-38M15.6		13	19312245	19317477	0	1.88387	0.434489	13.2216	0	0	0	36.7454	0	0	0	4.23431	8.43497	0.986028	0	0	0	2.55178	1.98819
ENSG00000246560	RP11-10L12.4		4	103749212	103765232	0.545472	3.46511	9.97325	0	0	0	0	1.71115	0	0	18.6822	11.2026	0	6.58215	18.2532	0	0	0	0
ENSG00000238197	GCFC1-AS1	GCFC1 antisense RNA 1 (non-protein coding) [Source:HGNC Symbol;Acc:39603]	21	34100426	34115433	7.93614	6.2279	6.9893	13.2216	0	0	0	2.45143	10.0577	0	0	11.2026	0	4.50538	0	0	0	5.81571	1.996
ENSG00000248255	AC126775.1		5	146939557	147041572	0	2.17775	22.6856	0	0	0	0	23.1116	0	0	0	0	0	2.93637	0	0	8.6253	9.68204	1.01229
ENSG00000250552	AC139495.1		5	68927362	68952148	2.18189	2.3915	1.68035	0	0	0	0	0	10.0577	0	18.6822	0	15.6109	1.75363	0	0	8.6253	0	8.98854
ENSG00000235427	AC006159.5		7	116182772	116192023	2.84518	5.57888	1.23071	0	0	0	0	0.82828	0	0	37.3643	5.6013	0	4.69867	0	0	0	10.5781	0.972072
ENSG00000230921	RP5-834N19.2		1	119911569	119912954	7.14326	2.75884	3.75381	13.2216	0	0	0	3.9874	10.0577	0	0	12.7029	0	6.79848	0	0	0	2.55178	6.71418
ENSG00000255043	RP11-808N1.1		11	19524219	19528776	1.09094	3.35684	2.19247	0	0	0	0	7.33622	20.1155	0	0	9.83561	0	2.46546	0	0	17.2506	4.69515	1.01229
ENSG00000227145	AC053545.3		4	123540138	123610311	0	0	0.889255	0	11.6678	0	0	0.480446	10.0577	0	37.3643	0	0	1.2943	0	0	0	4.40451	2.83098
ENSG00000253250	RP11-122A3.2		8	91968167	91997485	11.8434	3.18148	24.8252	0	0	0	0	1.38768	10.0577	0	0	0	0	2.1502	0	0	0	13.5224	1.98819
ENSG00000229012	GS1-542M4.4		X	8831902	8835642	8.03203	2.2628	1.48717	0	11.6678	12.0391	0	4.6104	0	0	0	0	0	10.536	0	0	8.6253	7.67683	1.93671
ENSG00000237037	RP4-669P10.18		22	42486937	42533614	7.8394	0.937715	0.450786	13.2216	0	0	0	1.8472	20.1155	0	0	0	7.80543	2.92989	0	13.6327	0	0	0
ENSG00000204792	AC104135.3		2	75145275	75165545	9.24945	4.24831	7.65556	0	0	0	0	0.920756	0	0	0	9.83561	7.80543	14.686	0	0	0	5.83065	8.46125
ENSG00000249825	CTD-2201I18.1		5	79348197	79379477	1.09094	4.945	2.48793	13.2216	0	12.0391	0	1.83167	0	0	0	0	0	2.6527	0	0	17.2506	13.0551	0
ENSG00000225756	NCRNA00118	non-protein coding RNA 118 [Source:HGNC Symbol;Acc:24155]	9	136519708	136522435	4.85065	0.937051	0.864089	0	11.6678	0	30.1623	7.93465	0	9.27833	0	0	0	2.84031	0	0	0	0	0
ENSG00000246581	AC005753.1		5	141227143	141231803	0	1.41409	0	0	0	0	0	3.10731	0	0	0	4.23431	7.80543	5.71154	36.5063	0	8.6253	0	0.98371
ENSG00000247381	AL390738.1		13	28403906	28495541	0	0	0.411165	0	0	0	0	0	0	64.9284	0	0	0	0.964311	0	0	0	0	1.98819
ENSG00000238010	RP11-123K19.2		9	129403035	129403572	0	0	1.0276	0	11.6678	0	0	0.732934	10.0577	0	18.6822	0	0	0.986028	18.2532	0	0	0	6.85251
ENSG00000006534	ALDH3B1	aldehyde dehydrogenase 3 family, member B1 [Source:HGNC Symbol;Acc:410]	11	67776048	67796744	13.4743	1.41485	1.16709	0	0	0	0	2.39878	0	0	18.6822	11.2026	0	1.10866	0	13.6327	0	5.06617	0
ENSG00000226025	AC093063.1		19	40170014	40185217	6.58069	3.38425	4.04332	13.2216	0	0	0	3.82373	10.0577	0	0	5.6013	0	8.47451	0	0	0	2.90786	9.76562
ENSG00000204934	RP4-751H13.6		7	149564786	149577699	0	4.57575	2.46766	13.2216	0	0	0	0.704159	20.1155	0	0	11.2026	0	3.00664	0	0	8.6253	0	3.84349
ENSG00000231595	AC005224.2		17	14113805	14121239	4.39881	0	2.79847	0	0	0	0	7.83115	0	0	18.6822	5.6013	0	9.00379	0	0	17.2506	0	1.996
ENSG00000234859	AC003958.2		17	39558668	39581301	0	0	0.740304	13.2216	11.6678	0	0	4.04182	0	0	18.6822	11.2026	0	0	0	0	0	5.06617	2.89989
ENSG00000244738	RP11-373E16.3		3	170374351	170379912	0.545472	5.49281	0.555601	13.2216	0	0	0	5.35151	10.0577	0	18.6822	0	0	1.10866	0	0	0	9.4118	3.01403
ENSG00000256884	RP11-64B16.3		12	119611870	119614289	13.5289	10.0607	9.19035	0	0	0	0	2.2479	0	0	0	0	0	0	0	13.6327	8.6253	9.04306	0.98371
ENSG00000227301	RP11-384P7.5		9	33719688	33722553	0	16.139	5.82243	0	0	0	0	2.84549	20.1155	9.26836	0	0	0	3.6637	0	0	0	4.69515	4.76262
ENSG00000233077	RP11-290F20.2		20	48927248	48937879	0.545472	12.0402	3.16478	13.2216	0	0	0	2.17197	0	0	0	0	7.80543	2.81294	0	0	0	17.5554	7.79962
ENSG00000241489	AF011889.5		X	148564621	148614672	5.14489	0	0	0	0	0	0	17.2082	10.0577	0	0	4.23431	0	3.59001	18.2532	0	8.6253	0	0
ENSG00000237886	RP11-611D20.2		9	139440664	139444345	4.96847	4.51079	1.97598	0	0	0	0	0.268018	0	0	18.6822	5.6013	15.6109	1.2943	0	0	0	6.43012	7.73126
ENSG00000227053	RP11-395B7.4		7	100657601	100660889	0.545472	0	2.86517	0	0	0	0	60.8247	0	0	0	0	0	0.789322	0	0	0	0	1.92782
ENSG00000177406	RP11-218M22.1		12	740057	772872	4.44875	1.93753	3.42289	0	0	0	0	6.88189	0	9.27833	0	0	0	3.06965	18.2532	0	0	2.90786	16.5596
ENSG00000238261	BX004987.5		1	143377281	143404415	35.539	0.902423	1.0599	0	0	0	0	1.34363	0	0	0	0	8.43497	14.1016	0	0	0	5.37072	0
ENSG00000250186	RP11-1079K10.4		17	47481443	47482559	0.545472	2.34818	16.6087	0	0	0	15.0811	4.29901	0	0	0	0	8.43497	0.949559	18.2532	0	0	0	0
ENSG00000236266	RP3-467L1.4		1	7870302	7887402	3.30786	2.66236	0.428473	0	0	0	0	3.85843	0	0	18.6822	0	0	3.6021	0	0	25.8759	6.15014	1.92782
ENSG00000227498	AC018359.3		3	34566310	34585372	0.545472	6.99729	6.01698	0	11.6678	0	0	10.1083	0	0	0	8.46862	0	1.92596	0	0	8.6253	4.40451	7.67483
ENSG00000256904	A2ML1-AS2	A2ML1 antisense RNA 2 (non-protein coding) [Source:HGNC Symbol;Acc:41523]	12	8972412	8973309	3.30786	2.5349	0	0	0	0	15.0811	17.0488	0	0	0	0	0	7.2274	0	13.6327	0	7.57298	0
ENSG00000255340	RP11-484D2.5		11	43400432	43407221	7.06756	1.27533	1.38119	0	11.6678	0	0	1.86066	0	0	18.6822	0	0	1.2943	18.2532	0	0	0	4.85308
ENSG00000254960	RP11-688I9.1		11	126810642	126814984	4.43742	1.80485	1.28014	0	11.6678	0	0	1.74692	0	9.27833	18.6822	0	0	6.41032	0	0	0	8.9819	2.00084
ENSG00000229175	RP11-501G7.1		13	80446721	80492079	0	0.887708	0.450786	0	0	0	0	1.16981	0	9.26836	18.6822	4.23431	8.43497	1.96243	0	0	0	2.90786	18.2192
ENSG00000243701	RP11-446H18.3		3	106959539	107045811	3.30786	16.564	0	0	0	0	0	5.86732	10.0577	0	0	0	24.6754	0.964311	0	0	0	4.75403	0
ENSG00000131548	TTTY6B	testis-specific transcript, Y-linked 6B (non-protein coding) [Source:HGNC Symbol;Acc:31887]	Y	24291113	24292978	0	4.67067	7.83892	0	11.6678	0	0	0.992949	0	0	0	9.83561	7.80543	0.964311	0	13.6327	0	2.90786	5.69076
ENSG00000228430	RP11-15B24.5		9	84888321	85043202	2.69451	6.6832	0	0	0	0	0	6.00633	0	0	0	4.23431	0	2.97043	0	0	0	0	43.2572
ENSG00000235343	AC005301.8		22	17227759	17229535	0	6.92317	2.62046	0	0	0	0	3.63266	0	0	18.6822	0	25.3049	0	0	0	8.6253	0	0
ENSG00000250802	CTC-564N23.3		5	76382565	76462734	5.33752	3.55007	5.20827	13.2216	23.3356	0	0	3.98575	0	0	0	0	0	2.12848	0	0	0	3.22735	5.73233
ENSG00000230068	RP1-224A6.6		1	22385690	22390692	6.36808	3.60018	2.24416	13.2216	0	0	15.0811	1.38005	0	9.27833	0	0	0	4.80997	0	0	0	0	9.73522
ENSG00000235023	AP001626.2		21	44068381	44071354	1.09094	1.03511	0.851095	0	0	0	0	2.40226	10.0577	0	18.6822	0	0	2.54295	0	0	17.2506	9.85758	1.83736
ENSG00000249349	CTC-384G19.1		5	84408160	84408574	0	0	0.776351	26.4431	23.3356	0	0	0.92282	0	0	0	4.23431	0	2.64045	0	0	0	4.69515	1.96742
ENSG00000236678	RP11-285E18.1		13	75126980	75130021	0	0	48.4677	0	0	0	0	0.497911	0	9.27833	0	0	0	3.02253	0	0	0	0	3.69627
ENSG00000253690	RP11-380I10.4		8	28107580	28196772	0	64.4613	0.404962	0	0	0	0	0	0	0	0	0	0	0	0	0	0	0	0
ENSG00000231290	RP5-907D15.2		20	57090435	57194944	0.545472	9.05545	3.80729	26.4431	0	0	0	2.15719	0	0	0	9.83561	0	2.84031	0	0	0	2.20226	7.84511
ENSG00000236008	AC011747.4		2	8699963	8723922	13.5968	2.55066	5.74129	0	0	0	0	1.90366	0	0	18.6822	0	0	0.964311	0	0	0	3.22735	18.0471
ENSG00000250903	RP1-80B9.2		6	2245982	2413825	0.545472	3.65928	5.86535	0	11.6678	0	0	3.8341	10.0577	9.27833	0	5.6013	0	9.0648	0	0	0	2.20226	2.92526
ENSG00000256783	RP11-503G7.1		12	133033746	133036610	6.06675	4.49457	0.862962	0	0	0	0	3.36023	20.1155	0	0	0	0	2.83978	0	13.6327	0	8.39737	4.88808
ENSG00000229539	RP11-119B16.2		20	3868886	3869515	0	1.24827	2.39077	0	0	0	0	2.36207	40.2309	0	0	0	0	0	18.2532	0	0	0	0
ENSG00000226053	RP5-1070A16.1		1	98676303	98738214	6.03522	0	0.404962	0	0	0	0	0.386784	40.2309	0	0	5.6013	0	9.65753	0	0	0	2.14337	0
ENSG00000226953	AC010890.1		2	134022540	134042334	0	2.82969	0.428473	0	0	24.0781	0	0.809372	0	27.8051	0	0	8.43497	0	0	0	0	0	0
ENSG00000223486	AC092198.1		X	39868529	39871435	1.76867	0.887708	1.57351	0	46.6712	0	0	0.480446	10.0577	0	0	0	0	2.86229	0	0	0	0	0
ENSG00000244625	CTA-211A9.5		22	27068730	27176170	0	4.56666	1.19867	13.2216	0	0	0	1.08532	10.0577	9.26836	0	5.6013	0	2.74282	0	0	8.6253	0	7.8211
ENSG00000231976	RP13-16H11.1		10	26932098	26942383	0.545472	9.34568	3.21535	0	11.6678	0	0	1.31265	10.0577	0	0	0	0	1.2943	0	0	0	15.6069	10.7899
ENSG00000226089	RP1-300G12.2		6	82236819	82244630	5.69036	1.41409	4.51195	0	11.6678	0	0	3.51622	0	0	0	4.23431	0	8.17766	0	13.6327	0	5.12505	5.86161
ENSG00000235669	AC004593.3		7	29239156	29248586	9.14163	2.31651	1.87756	0	0	24.0781	0	9.0171	0	0	0	0	0	5.00934	0	0	8.6253	2.55178	0.972072
ENSG00000231574	RP11-91K9.1		3	177534653	177617012	2.84518	1.11618	6.26754	0	0	0	0	0.44827	10.0577	0	0	4.23431	0	11.6532	18.2532	0	8.6253	0	0
ENSG00000227533	RP5-848E13.3		1	43424720	43449029	0.545472	1.03511	4.24487	13.2216	0	0	0	4.46956	0	0	18.6822	4.23431	0	5.29315	0	0	0	0	11.7585
ENSG00000255056	BAIAP2L1	BAI1-associated protein 2-like 1 [Source:HGNC Symbol;Acc:21649]	7	97935795	97937162	15.2084	1.93753	0.960563	0	0	0	0	3.1614	0	0	0	0	0	4.14328	0	0	17.2506	20.8165	0
ENSG00000248810	RP11-362F19.1		4	142240604	142253772	6.91355	1.80485	9.42139	0	11.6678	0	0	4.60436	0	0	0	0	8.43497	5.11722	0	0	8.6253	2.9228	3.93233
ENSG00000250007	AC087457.1		15	35047285	35105124	5.622	2.13012	2.56747	0	0	0	0	15.5576	0	0	18.6822	0	0	3.059	0	13.6327	0	0	1.98942
ENSG00000215458	AP001053.11		21	45225639	45232448	0.545472	4.70892	0.416605	0	0	0	0	4.4745	40.2309	0	0	0	0	1.10866	0	0	0	0	11.7102
ENSG00000251629	RP11-774D14.1		5	20611949	20937800	1.76867	3.29393	0.816127	13.2216	0	0	0	1.42685	0	0	0	8.46862	0	2.14057	18.2532	13.6327	0	0	0
ENSG00000243961	RP5-839B4.8		20	9966736	10023864	9.65534	1.93753	3.82254	0	0	12.0391	0	2.10495	0	0	18.6822	4.23431	0	6.50199	0	0	0	0	3.88085
ENSG00000233288	RP11-760D2.5		7	56601923	56605823	28.7086	0	4.11994	0	0	0	0	2.25326	10.0577	0	0	0	0	9.07606	0	0	8.6253	0	0
ENSG00000248804	AC087699.1		15	70863298	70878945	4.99422	1.41409	4.88647	0	0	0	0	8.65524	10.0577	0	0	4.23431	8.43497	0	0	13.6327	0	4.34563	1.98819
ENSG00000254551	RP11-727A23.7		11	82920473	82924421	2.29971	2.18905	21.8149	0	0	0	15.0811	2.20322	0	0	0	4.23431	7.80543	0	0	0	0	6.95629	0
ENSG00000230151	RP11-432B10.1		10	109136308	109160994	0	5.61679	3.04743	0	11.6678	0	0	12.2937	0	0	0	0	0	1.76572	18.2532	0	0	7.98897	1.92782
ENSG00000237927	RP3-393E18.2		6	160007987	160010201	11.0496	10.3434	1.2422	0	0	0	0	0.464916	10.0577	0	18.6822	0	0	6.18875	0	0	0	2.55178	1.93671
ENSG00000233123	RP5-1059M17.1		7	101206059	101212286	3.40508	2.35114	2.35251	0	0	0	0	1.96019	0	18.5567	18.6822	0	7.80543	4.24221	0	0	0	2.14337	1.01229
ENSG00000206417	RP13-685P2.5		3	129034235	129045068	0	1.11618	2.25793	0	11.6678	0	0	3.14025	0	18.5467	0	9.83561	0	4.78681	0	0	0	4.28675	6.84375
ENSG00000254235	RP11-115J16.1		8	9106927	9271224	0	2.66312	0.976721	0	0	24.0781	0	1.1551	0	9.26836	0	5.6013	8.43497	0.789322	0	0	0	8.36749	1.00087
ENSG00000232301	RP11-132A1.3		7	100942894	100944551	0	0.996159	33.8009	0	0	0	0	3.56995	0	0	18.6822	0	0	2.11373	0	0	0	2.14337	1.01229
ENSG00000247287	AL359220.1		14	61769749	61789536	6.61573	4.89549	6.48846	0	0	0	15.0811	6.76733	0	0	18.6822	0	0	2.65254	0	0	0	0	1.01229
ENSG00000231534	AC009973.2		2	230807444	230809853	4.62827	2.77356	2.12662	13.2216	0	0	15.0811	0.968732	0	0	0	0	7.80543	3.95646	0	0	8.6253	0	2.97674
ENSG00000251141	RP11-53O19.1		5	44745002	44808879	11.667	0.937715	0	13.2216	0	0	0	2.62938	10.0577	0	0	0	0	9.49141	0	0	8.6253	2.55178	2.97674
ENSG00000254651	RP11-430H10.3		11	45420998	45422078	1.09094	1.28663	1.11572	0	11.6678	0	0	0.809372	20.1155	0	18.6822	0	0	4.1437	0	0	0	3.22735	0
ENSG00000250366	AL133167.1		14	96342729	96391899	9.3888	0	19.4981	0	11.6678	0	0	0.85927	10.0577	0	0	0	0	10.5992	0	0	0	0	0
ENSG00000245750	AC100826.1		15	69854059	69863779	2.14904	2.18236	0.745744	0	0	0	0	0.795406	0	0	0	0	24.0458	32.0809	0	0	0	0	0
ENSG00000236709	RP11-40C6.3		9	90168369	90169374	0	3.10246	0.740304	0	11.6678	0	0	2.51213	0	0	37.3643	5.6013	0	0.949559	0	0	0	0	0
ENSG00000244833	AC012533.1		8	81806189	81864554	10.6841	2.41025	0.226462	0	0	0	0	2.11356	0	0	18.6822	0	0	5.32076	18.2532	0	0	2.20226	1.97711
ENSG00000235862	RP11-338C15.5		1	212797626	212800113	4.94428	0	27.0699	0	0	0	0	2.94579	0	0	18.6822	0	0	0	0	0	0	2.14337	5.67844
ENSG00000232533	AC093673.5		7	143076785	143077588	0	5.21275	10.4335	0	0	0	0	0.317376	0	0	0	0	0	2.66216	0	0	25.8759	5.81571	10.9711
ENSG00000225057	AC096574.4		2	239140325	239164274	0	1.82179	1.29144	13.2216	0	0	0	0.687802	10.0577	0	0	4.23431	0	0	0	0	0	6.43012	23.4983
ENSG00000233403	RP11-86A5.1		X	25896456	25911661	3.23998	4.99585	15.6257	0	0	0	0	3.37152	0	0	0	0	8.43497	3.62264	0	0	0	16.0294	5.81553
ENSG00000197085	AC005688.1	asthma-associated alternatively spliced gene 1 (AAA1), transcript variant 3, non-coding RNA [Source:RefSeq DNA;Acc:NR_015356]	7	34386124	34911194	2.84518	2.76247	1.7104	0	11.6678	0	0	4.37277	0	9.26836	0	9.83561	7.80543	5.96307	0	0	0	2.90786	1.94414
ENSG00000250208	RP11-143E21.7		12	130634894	130646801	3.30786	0	2.5094	0	11.6678	0	0	1.47128	0	9.26836	0	0	8.43497	0.949559	18.2532	0	0	3.22735	1.92782
ENSG00000248721	AC063976.6		5	131528679	131529261	4.59941	1.27533	2.92631	26.4431	0	0	0	0.326856	0	0	18.6822	0	0	1.86338	0	0	0	2.9228	1.92782
ENSG00000255955	AL136362.1		X	91354536	91360178	0	0	36.5822	0	0	0	0	4.64108	0	0	0	0	0	8.50478	0	0	8.6253	2.55178	0
ENSG00000254698	RP11-659G9.3		11	82674723	82750157	6.52209	1.24827	0.851095	0	11.6678	0	15.0811	4.90974	0	18.5567	0	0	0	0	0	0	0	0	1.98819
ENSG00000249631	RP11-281P23.2		4	11627338	11815582	1.63641	1.24827	0.99009	0	0	0	15.0811	5.41936	30.1732	0	0	0	0	2.36797	0	0	0	0	3.80478
ENSG00000235426	RP11-342M3.5		10	81142084	81169030	6.73713	4.84844	0	0	0	0	0	0	10.0577	0	18.6822	0	8.43497	1.67614	0	0	0	7.98897	2.02458
ENSG00000251422	AL035541.1		20	56130115	56134053	16.9855	4.44152	9.97633	0	0	0	0	1.30842	0	0	0	0	16.8699	8.72855	0	0	0	0	1.996
ENSG00000256508	AP003071.1		11	68779899	68785913	0.545472	16.2798	18.3932	0	0	0	0	1.12348	0	0	0	4.23431	0	8.98552	0	0	0	0	10.7111
ENSG00000198221	C6orf124	chromosome 6 open reading frame 124 [Source:HGNC Symbol;Acc:21236]	6	168224556	168227466	2.69451	1.2277	2.48117	13.2216	0	0	0	0.641816	10.0577	0	0	0	7.80543	0.9764	0	0	17.2506	2.90786	1.00087
ENSG00000224843	NCRNA00240	non-protein coding RNA 240 [Source:HGNC Symbol;Acc:18772]	6	26988232	26991703	0	8.90895	1.60505	0	0	0	0	12.259	0	0	0	0	0	0.964311	36.5063	0	0	0	0
ENSG00000256162	AL109938.1		6	131148546	131158273	0	0	0	0	11.6678	0	15.0811	3.57312	10.0577	0	0	0	0	18.6659	0	0	0	0	0.972072
ENSG00000227540	RP11-152N13.5		10	75012549	75014107	0	3.6039	3.00738	0	0	12.0391	0	2.90632	0	0	0	0	7.80543	10.1831	18.2532	0	0	2.20226	0
ENSG00000248706	AC100791.3		17	77889984	77900524	0	0	0	0	0	0	15.0811	0.884695	0	0	0	0	0	0	36.5063	0	0	6.54788	0.972072
ENSG00000235461	RP5-928E24.2		X	84465712	84474704	0	1.24827	0.825593	0	11.6678	0	0	1.77571	30.1732	0	0	4.23431	8.43497	1.57864	0	0	0	0	0
ENSG00000233234	RP11-740P5.2		1	2728415	2729257	4.30517	2.00388	2.1372	26.4431	0	12.0391	0	1.52141	0	0	0	0	0	7.43935	0	0	0	0	4.00135
ENSG00000224137	AC079767.4		2	208527099	208531748	2.31414	0	35.2902	0	0	0	15.0811	0.298609	0	0	0	5.6013	0	1.2943	0	0	0	0	0
ENSG00000235280	MCF2L-AS1	MCF2L antisense RNA 1 (non-protein coding) [Source:HGNC Symbol;Acc:39825]	13	113621823	113623138	1.09094	2.34818	0	13.2216	0	12.0391	0	4.80589	10.0577	9.26836	0	0	0	3.04937	0	0	0	0	3.82555
ENSG00000225265	RP11-378J18.3		1	222763167	222766374	0	2.16304	0	0	0	0	0	2.63085	20.1155	0	0	0	0	0.986028	18.2532	13.6327	0	0	1.85891
ENSG00000247134	RP11-11N9.4		8	32853696	32902373	2.29971	0	3.22339	0	0	0	0	0.927507	20.1155	0	0	0	0	0.986028	18.2532	0	8.6253	2.20226	3.00171
ENSG00000255224	CTD-3065J16.9		8	145132905	145134168	0.545472	4.63064	1.50336	0	0	0	0	2.95098	20.1155	0	0	4.23431	7.80543	5.18338	0	0	0	8.5735	3.90965
ENSG00000228011	RP11-408O13.2		13	78236635	78237275	0	0	0.667308	39.6647	0	0	0	0	10.0577	0	0	0	7.80543	1.16417	0	0	0	0	0
ENSG00000224729	RP13-530H6.2		7	100187025	100201829	0	0	3.12628	0	11.6678	0	0	5.748	0	0	0	0	0	0.986028	18.2532	0	17.2506	2.14337	0
ENSG00000248614	AC116562.3		4	4034897	4076780	0	0	0	0	0	0	0	50.4681	0	0	0	0	0	0	0	0	8.6253	0	0
ENSG00000248306	RP11-13E1.3		10	49407711	49409697	1.09094	2.1154	6.32743	0	0	0	15.0811	4.31746	0	0	0	0	8.43497	6.07629	0	13.6327	0	0	2.01316
ENSG00000224750	RP11-94M14.2		10	92213927	92290873	2.84518	6.7276	10.8621	13.2216	0	0	0	8.99579	0	0	0	5.6013	0	6.6073	0	0	0	2.14337	1.96062
ENSG00000245070	AC068765.1		3	107149777	107182756	0	0	1.34218	0	0	0	0	2.18868	0	0	0	4.23431	0	5.59613	18.2532	27.2654	0	0	0
ENSG00000235813	RP11-308B5.2		X	133733487	133740284	4.44875	1.83651	3.85279	13.2216	0	0	0	2.6507	0	0	0	14.0699	15.6109	0.9764	0	0	0	2.20226	0
ENSG00000203733	GJE1	gap junction protein, epsilon 1, 23kDa [Source:HGNC Symbol;Acc:33251]	6	142454227	142456288	0	2.31651	3.20204	0	0	0	0	0	0	0	0	5.6013	0	2.84868	0	40.8981	0	0	3.96826
ENSG00000224167	RP3-522D1.1		1	113392650	113420493	3.39065	0	2.0243	0	0	0	0	0.782603	10.0577	0	0	12.7029	7.80543	15.9706	0	0	0	5.77912	0
ENSG00000231175	RP11-463J7.2		1	190594020	190770788	0	2.35181	0.599131	13.2216	0	0	0	4.48771	0	9.27833	18.6822	0	0	7.76531	0	0	0	0	1.94414
ENSG00000181652	ATG9B	ATG9 autophagy related 9 homolog B (S. cerevisiae) [Source:HGNC Symbol;Acc:21899]	7	150709302	150721586	8.83623	1.8741	0.976721	0	11.6678	0	0	2.75577	0	0	0	0	0	12.9739	18.2532	0	0	0	0.988553
ENSG00000224223	GS1-18A18.1		7	54624663	54639419	0.545472	2.0186	0.827771	0	0	0	0	11.6286	0	0	0	0	0	6.76729	36.5063	0	0	0	0
ENSG00000246223	C14orf64	chromosome 14 open reading frame 64 [Source:HGNC Symbol;Acc:20111]	14	98391975	98444461	3.30786	2.49654	0	0	0	12.0391	0	8.65919	10.0577	0	0	0	7.80543	1.75363	0	0	8.6253	2.55178	0.98371
ENSG00000228010	AC073343.13		7	6703605	6748532	0.545472	1.93387	1.46652	13.2216	0	0	0	2.82201	10.0577	0	0	0	0	2.14057	18.2532	0	0	2.9228	4.79762
ENSG00000250775	RP11-12K22.1		4	64334419	64359996	2.31414	6.59941	3.25103	0	0	0	0	2.40064	20.1155	0	0	4.23431	0	7.55279	0	0	0	0	11.6308
ENSG00000225339	RP11-513I15.6		6	34247482	34252266	17.2078	1.93321	1.96502	0	0	0	0	2.96413	0	9.27833	0	4.23431	0	4.99971	0	0	0	0	15.5129
ENSG00000228842	PCDH9-AS2	PCDH9 antisense RNA 2 (non-protein coding) [Source:HGNC Symbol;Acc:39896]	13	67433130	67489163	0	1.27533	6.42284	0	0	0	0	2.08994	10.0577	0	18.6822	5.6013	0	11.9448	0	0	0	0	2.00084
ENSG00000245754	AP000337.1		21	47874900	47878593	0.545472	7.06375	9.95184	0	0	0	0	1.29595	0	0	0	4.23431	0	23.3228	0	0	8.6253	0	3.00048
ENSG00000232257	RP11-92G12.3		1	200638635	200663378	9.59674	2.31043	1.15071	0	0	0	0	6.40189	10.0577	0	0	0	15.6109	5.5872	0	0	0	2.55178	4.69714
ENSG00000236507	RP5-1050E16.1		9	92503174	92504508	0.545472	0	0.226462	0	0	12.0391	0	0.472486	0	9.27833	0	5.6013	0	5.70063	0	13.6327	0	10.1912	0
ENSG00000244345	RP11-654C22.2		3	72553957	72599703	0	8.15085	1.27638	26.4431	0	0	0	5.10565	0	0	0	9.83561	0	2.92989	0	0	0	0	3.89524
ENSG00000152487	RP11-139J15.2		10	18940195	18948196	5.07653	0	0.599131	0	0	0	0	1.7099	10.0577	0	18.6822	0	7.80543	0	0	13.6327	0	0	0
ENSG00000251393	AC005280.3		14	73929129	73946655	0.545472	4.12732	0	13.2216	0	0	0	2.25243	0	0	18.6822	0	0	9.38219	0	0	0	5.47457	3.83601
ENSG00000234772	RP11-428O18.4		13	27810419	27810948	6.38251	0	3.70299	0	11.6678	0	0	4.35769	0	0	0	0	0	10.5097	0	0	17.2506	2.55178	0.972072
ENSG00000224152	AC009506.1		2	160471807	160473593	0	1.27533	1.27235	0	0	0	0	1.33215	0	0	0	0	0	12.1059	0	0	34.5012	2.90786	3.83336
ENSG00000249044	RP11-330M2.7		9	99660348	99711867	18.0071	0	1.03362	26.4431	0	0	0	0	0	0	0	0	0	11.7316	0	0	0	0	0
ENSG00000250069	CTB-131B5.2		5	139579748	139582772	4.39881	0	0	13.2216	0	0	0	1.63235	10.0577	0	18.6822	4.23431	0	2.97043	0	0	0	0	1.98819
ENSG00000225037	RP11-393H10.4		X	20158086	20158562	0	2.2628	2.59721	0	11.6678	0	0	0.508353	0	9.27833	0	9.83561	8.43497	0	0	0	8.6253	2.9228	1.00087
ENSG00000254604	AP000487.6		11	70128473	70209474	31.0798	3.28886	2.56379	0	0	0	0	2.05449	10.0577	0	0	0	0	5.14128	0	0	0	0	2.94011
ENSG00000239235	AC008280.5		2	54197975	54307601	3.30786	0	2.53354	0	11.6678	0	0	2.64854	0	0	0	4.23431	23.4163	4.13621	0	0	0	2.14337	3.01403
ENSG00000248890	RP11-291L15.2		4	145564074	145582509	0.545472	2.82818	2.30328	0	11.6678	0	0	2.41538	0	0	0	4.23431	0	6.14218	18.2532	0	0	8.68698	0
ENSG00000228016	AC018712.3		2	173541869	173600934	0	8.83687	3.22762	26.4431	0	0	0	0.687802	10.0577	0	0	0	0	2.24386	0	0	0	2.55178	3.00048
ENSG00000226097	AC099342.1		7	20336331	20351335	5.36327	2.35114	4.21261	0	11.6678	0	0	3.94156	0	0	0	4.23431	0	3.38149	18.2532	0	0	2.55178	0.972072
ENSG00000247909	AL669918.1		6	32862500	32871535	5.96734	3.9939	8.98072	0	0	0	0	6.27048	0	0	0	0	0	10.6487	0	13.6327	0	6.43012	1.00087
ENSG00000229242	RP5-1111A8.3		1	216059924	216074806	1.63641	1.41485	4.35359	0	0	0	0	0.948759	0	0	0	11.2026	16.8699	0	18.2532	0	0	2.14337	0
ENSG00000242774	AC105749.5		3	36810216	36825658	2.84518	2.18236	2.87549	39.6647	0	0	0	0.91225	0	0	0	0	0	6.31428	0	0	0	0	2.00084
ENSG00000235919	RP11-29H23.1		1	155531833	155533735	6.09959	0.934085	3.28154	0	0	0	0	4.61898	10.0577	0	0	0	0	4.13621	18.2532	0	0	8.39737	0.972072
ENSG00000244879	AC022087.1		15	50647664	50650501	8.89749	5.92759	4.68902	0	0	0	0	5.99617	0	0	0	5.6013	7.80543	2.65254	0	0	8.6253	5.45963	1.01229
ENSG00000239636	RP4-728D4.2		1	36035414	36043330	4.99422	0.902423	1.05205	0	0	0	0	0.789023	0	0	0	4.23431	0	4.6125	18.2532	0	8.6253	2.20226	10.8654
ENSG00000250900	CTC-338M12.6		5	180622496	180630103	1.09094	1.27533	2.1695	13.2216	11.6678	0	0	1.49593	0	9.26836	0	0	0	0	0	0	8.6253	2.9228	4.78653
ENSG00000204581	AC096670.3		2	111855922	111873165	5.57254	0.934085	3.50556	0	11.6678	0	0	5.05377	10.0577	0	0	5.6013	0	8.75098	0	0	0	5.37072	0
ENSG00000089336	AC002115.6		19	36103665	36116251	3.23998	0	2.11671	13.2216	0	0	0	1.29128	10.0577	0	0	0	0	3.00664	0	0	17.2506	5.06617	0.988553
ENSG00000255866	RP11-221N13.2		12	65953371	65954669	0	1.28663	0.416605	0	0	0	0	0.507833	0	0	37.3643	0	0	0.789322	0	13.6327	0	2.14337	0
ENSG00000254837	AP001372.2		11	74204411	74209578	2.69451	1.41409	2.25503	0	0	0	0	5.39349	20.1155	0	0	0	0	4.52482	0	13.6327	0	5.10355	1.00087
ENSG00000228043	AC097721.2		2	139175854	139259268	2.29971	3.34003	2.53035	0	0	24.0781	0	1.7342	0	0	0	0	0	0.964311	18.2532	0	0	2.90786	0
ENSG00000245975	AC090515.1		15	59060273	59063173	1.76867	2.22385	0.881397	13.2216	0	0	0	11.6985	0	0	0	5.6013	0	8.70369	0	0	8.6253	3.22735	0
ENSG00000253354	CTA-392C11.2		8	40227547	40259367	8.20845	1.93753	4.60107	0	0	0	0	7.1378	0	0	0	12.7029	0	3.24464	0	0	8.6253	8.39737	0.98371
ENSG00000251576	RP11-536I6.1		3	14389951	14394068	3.21423	0	1.25682	0	0	0	0	1.90107	10.0577	0	0	0	0	2.83978	18.2532	0	17.2506	0	0.988553
ENSG00000228151	AC004941.3		7	149095295	149098547	6.00237	2.31651	3.8845	0	0	0	0	2.21846	0	0	18.6822	4.23431	0	2.89027	0	13.6327	0	0	1.85891
ENSG00000245748	RP11-367J11.2		4	7032281	7047958	2.29971	3.41131	5.41548	0	0	0	0	1.41067	20.1155	0	0	0	7.80543	7.35647	0	0	0	2.9228	4.8672
ENSG00000228372	RP11-85L21.4		X	134250684	134257880	5.07653	2.21238	0.434489	0	0	12.0391	0	8.49477	0	0	0	0	0	7.11388	18.2532	0	0	0	1.97226
ENSG00000241098	RP11-139K4.1		3	182164758	182204152	0.545472	2.75588	0.637627	0	0	0	15.0811	0.301018	10.0577	0	0	0	0	3.40803	18.2532	0	0	2.55178	2.00084
ENSG00000125514	NCRNA00029	non-protein coding RNA 29 [Source:HGNC Symbol;Acc:16184]	20	61665569	61668380	0	0.887708	1.95273	13.2216	23.3356	0	0	1.1333	10.0577	0	0	0	0	2.40296	0	0	0	2.55178	0
ENSG00000250729	AL158035.1		6	112221562	112230481	2.29971	0	0.434489	0	0	36.1172	0	1.35565	10.0577	0	0	0	0	2.71528	0	0	0	2.55178	0
ENSG00000238063	RP11-329N22.1		1	38940868	38942156	5.85147	0.937051	4.69858	0	0	0	0	1.33167	10.0577	0	0	0	7.80543	3.00664	18.2532	0	0	2.55178	1.00087
ENSG00000236997	RP5-934G17.2		1	11882854	11883337	3.95055	2.18905	1.25407	0	0	0	0	1.27348	0	0	18.6822	0	0	2.2707	18.2532	0	0	7.60301	0
ENSG00000241884	RP11-85I21.1		3	67346724	67356783	1.09094	2.17775	3.20285	0	0	0	0	1.30423	0	27.825	0	9.83561	7.80543	2.12848	0	0	0	0	0
ENSG00000245466	AL357153.2		14	71075515	71108015	0.545472	5.05032	5.05576	13.2216	0	0	0	1.32693	0	0	0	0	0	0.986028	0	0	0	5.83065	23.1854
ENSG00000226856	AC093901.1		2	118889704	118943962	0	0	4.95532	0	0	0	0	0.793993	30.1732	0	0	5.6013	0	4.81623	0	0	0	0	8.7881
ENSG00000234695	AC002076.10		7	93520225	93522913	2.14904	0	0.839638	0	11.6678	0	0	10.8938	10.0577	0	0	0	0	4.72567	0	0	8.6253	6.15014	0
ENSG00000228294	AL589743.2		14	19670480	19686002	2.66876	4.32949	0.78444	0	0	0	15.0811	1.37077	0	0	18.6822	9.83561	0	2.25861	0	0	0	0	0
ENSG00000228395	RP11-216B9.6		9	131291180	131314689	0	1.41409	0.434489	0	0	0	0	1.6882	0	9.26836	0	4.23431	0	7.5877	0	0	17.2506	11.2087	1.85891
ENSG00000224081	RP11-86H7.1		1	95104017	95285837	3.53733	0.934085	0.90371	13.2216	0	12.0391	0	1.15162	0	9.27833	0	5.6013	0	1.16417	0	0	0	3.22735	3.86453
ENSG00000248975	CTD-2251F13.1		14	30421603	30766249	0	0	0	0	0	0	0	11.9547	0	0	0	5.6013	7.80543	2.25861	0	27.2654	0	0	0
ENSG00000241956	CTC-340A15.2		5	163723702	164598649	2.14904	1.93387	3.4251	0	11.6678	0	0	3.13633	20.1155	0	0	0	0	10.3988	0	0	0	0	1.96062
ENSG00000250039	RP11-17E2.2		4	21950638	22331953	0	0	0	0	0	0	0	0	0	0	0	0	54.638	0	0	0	0	0	0
ENSG00000242629	RP11-89C21.2		10	11605186	11615495	0	0.937051	0.226462	26.4431	0	0	0	0.472486	0	0	0	4.23431	0	0	18.2532	0	0	0	3.90897
ENSG00000230438	RP11-420G6.4	serpin peptidase inhibitor, clade B (ovalbumin), member 9 pseudogene (MGC39372), non-coding RNA [Source:RefSeq DNA;Acc:NR_033851]	6	2854891	2876744	0	0	2.43583	0	0	0	0	2.25527	0	0	0	29.5068	7.80543	0.964311	0	0	8.6253	0	2.80943
ENSG00000230975	AC084193.1		2	80926513	81097315	0.545472	5.38145	7.03411	13.2216	0	0	0	2.44256	0	0	0	5.6013	0	0.949559	18.2532	0	0	0	0.972072
ENSG00000251603	RP11-164P12.4		4	152588376	152591654	0	10.1434	7.05246	13.2216	0	12.0391	0	6.75935	0	0	0	4.23431	0	0.949559	0	0	0	0	0
ENSG00000228839	RP3-400N23.6		22	31688485	31734007	4.06837	4.50385	2.30775	0	0	0	0	4.00286	10.0577	0	0	4.23431	0	4.96826	18.2532	0	0	0	1.97711
ENSG00000230006	ANKRD36BP2	ankyrin repeat domain 36B pseudogene 2 [Source:HGNC Symbol;Acc:33607]	2	89065324	89106126	0	0.996159	0.411165	0	0	0	0	4.01503	0	0	0	0	0	28.5465	18.2532	0	0	2.14337	0
ENSG00000248195	CTC-261N6.3		5	85630842	85631626	6.23583	4.44803	2.09831	0	0	0	0	4.59561	0	0	0	0	0	6.10427	18.2532	0	8.6253	0	3.86453
ENSG00000253476	RP11-395I14.2		8	25283037	25284096	2.31414	6.88978	0.74482	13.2216	0	0	0	1.9685	0	0	0	5.6013	0	3.61172	0	0	0	2.90786	16.9619
ENSG00000241168	RP11-10O22.1		3	162744184	162949937	1.09094	0	0.868979	0	0	0	0	30.5991	0	0	18.6822	0	0	0	0	0	0	2.90786	0
ENSG00000212766	NCRNA00277	non-protein coding RNA 277 [Source:HGNC Symbol;Acc:26596]	15	69365266	69388147	1.76867	3.43791	1.39689	0	0	0	0	0.582978	10.0577	0	0	25.4059	0	2.07297	0	0	0	5.45963	3.80962
ENSG00000245381	AC011477.2		19	19945686	20008579	3.23998	4.15518	2.97048	0	0	0	0	0	10.0577	0	18.6822	4.23431	0	0.9764	0	0	0	2.90786	6.68285
ENSG00000226758	RP4-730B13.3		1	232061580	232080979	2.84518	0.934085	0.329139	13.2216	0	0	0	2.01268	0	0	18.6822	0	0	5.86733	0	0	0	7.97403	1.96062
ENSG00000232157	RP1-187N21.2		6	34252267	34254545	1.76867	1.11618	1.26811	0	0	0	0	1.50417	0	18.5567	0	9.83561	0	10.633	0	0	0	3.22735	5.84568
ENSG00000211683	AP000346.2		22	23974071	23981128	4.39881	2.69018	1.10365	0	11.6678	0	0	3.12992	0	0	0	0	0	7.93857	0	0	0	5.47457	17.3218
ENSG00000248505	RP11-319E12.1		4	58292038	58332152	4.59941	4.15665	4.51055	0	0	0	0	2.30489	0	9.27833	0	5.6013	8.43497	5.32076	0	0	0	6.489	2.92526
ENSG00000249722	CTC-430J12.2		5	173756615	173757506	5.15932	1.93321	1.88146	0	11.6678	0	0	0.301018	10.0577	9.27833	0	5.6013	0	1.77535	0	0	0	0	5.93445
ENSG00000144596	GRIP2	glutamate receptor interacting protein 2 [Source:HGNC Symbol;Acc:23841]	3	14530619	14583588	0	3.03899	2.68337	0	11.6678	0	0	2.44524	0	0	18.6822	0	0	5.06512	0	0	0	7.98138	2.00084
ENSG00000233177	RP11-179H18.2		10	121331316	121334113	3.95055	2.81795	5.51992	0	0	0	0	2.34981	0	0	0	0	23.4163	3.8763	0	0	0	2.90786	8.71553
ENSG00000251136	RP11-37B2.1		8	90621629	90769955	8.30208	0.902423	0.845078	0	0	0	0	4.4662	0	0	0	0	0	2.6257	18.2532	13.6327	0	2.55178	1.93671
ENSG00000196696	PDXDC2P	pyridoxal-dependent decarboxylase domain containing 2, pseudogene [Source:HGNC Symbol;Acc:27559]	16	70010200	70099851	10.7279	5.76785	2.97561	0	0	0	0	5.18909	0	0	0	9.83561	0	6.47744	0	0	8.6253	2.9228	0.972072
ENSG00000250508	AP000808.1		11	68638132	68642010	2.29971	0	0	0	11.6678	0	0	8.00774	10.0577	0	0	5.6013	0	0	0	0	0	0	15.7951
ENSG00000227083	L29074.3		X	146981696	146982977	0.545472	0.937051	0.428473	0	0	0	0	3.82141	0	9.27833	0	9.83561	7.80543	4.83381	0	13.6327	0	2.20226	0
ENSG00000229599	RP11-118F16.1		13	101593116	101596618	0	4.44739	1.52068	0	0	0	0	7.18927	0	0	18.6822	9.83561	0	0	0	0	0	8.76839	2.8712
ENSG00000223989	RP11-84A14.5		1	9908376	9910212	5.88299	1.41485	1.72503	13.2216	0	0	0	0.497911	0	0	0	0	16.2404	4.16724	0	0	0	2.20226	7.88196
ENSG00000251601	RP11-317O24.2		5	50225318	50230355	0	1.28663	0.416605	0	0	12.0391	0	17.8172	0	0	0	0	0	3.41502	18.2532	0	0	0	0
ENSG00000223634	AC012506.3		2	23580387	23583247	8.44658	0.887708	2.75341	0	0	0	0	5.94914	10.0577	0	0	0	0	0.964311	18.2532	0	0	0	5.89907
ENSG00000225156	AC012354.6		2	45181803	45195897	4.06837	1.93387	2.46581	0	0	0	0	7.83706	0	9.27833	0	0	7.80543	3.13623	0	13.6327	0	2.90786	0
ENSG00000249219	RP13-560N11.1		4	9924438	9925770	6.08516	5.27373	4.67173	0	0	0	15.0811	2.56878	0	0	0	5.6013	0	6.74412	0	0	0	6.95629	0
ENSG00000249403	CTC-281M20.4		5	174413298	174414053	2.29971	3.72528	1.39505	0	0	0	0	3.295	0	0	18.6822	0	0	0	0	0	17.2506	5.10355	0.988553
ENSG00000248168	AC138028.2		16	88738213	88746008	7.92171	0	3.36544	0	0	0	0	2.46648	0	0	0	8.46862	7.80543	9.75812	0	0	0	0	12.8307
ENSG00000250497	AC007126.1		4	13779001	13783781	0.545472	0	0.599131	13.2216	0	0	0	6.33616	20.1155	0	0	0	0	8.75653	0	0	0	0	2.99687
ENSG00000231711	RP11-398F12.1		22	46436146	46440733	0	0	2.09482	13.2216	0	0	0	7.93606	0	0	0	0	23.4163	2.97043	0	0	0	0	2.91153
ENSG00000237978	RP11-385J1.2		3	178244293	178578193	0.545472	0.934085	1.71682	0	0	0	0	8.12997	0	0	0	0	0	5.70191	18.2532	0	17.2506	0	0
ENSG00000176728	TTTY14	testis-specific transcript, Y-linked 14 (non-protein coding) [Source:HGNC Symbol;Acc:18495]	Y	21034387	21239302	9.34667	0	3.56617	0	11.6678	0	0	3.89799	0	0	0	11.2026	0	0	0	0	8.6253	3.22735	0.972072
ENSG00000232160	RP5-842K24.2		X	131351175	131566890	3.21423	2.16475	2.73058	0	0	0	0	5.63224	0	0	0	14.0699	0	0.949559	0	0	0	3.22735	20.3392
ENSG00000231183	AC007003.1		7	76531808	76548508	0	27.6035	2.26164	13.2216	0	0	0	0.455747	0	0	0	0	0	0	0	0	8.6253	0	0
ENSG00000244158	RP1-93H18.6		6	116781902	116784855	3.23998	3.57001	3.98907	13.2216	0	0	15.0811	4.16923	0	0	0	0	0	2.08362	0	0	0	2.90786	3.88829
ENSG00000249748	RP11-79C6.3		5	35938924	35940095	1.09094	2.07021	2.5466	0	0	0	15.0811	3.86295	10.0577	9.27833	0	0	0	4.78499	0	0	0	3.22735	0
ENSG00000253636	RP11-531A24.5		8	73964413	73975296	0.545472	3.91139	0.637627	0	23.3356	0	0	9.13355	0	0	0	0	0	9.45928	0	0	0	0	4.97003
ENSG00000167912	RP11-25K19.1		8	60031599	60033905	6.58069	0.902423	9.26832	0	0	0	0	2.67901	0	0	0	0	0	7.04321	0	0	8.6253	11.9957	4.8654
ENSG00000225975	AC074138.3		19	37176216	37178351	0.545472	2.56196	1.78213	13.2216	0	0	0	3.00728	0	0	18.6822	4.23431	0	4.73943	0	0	0	2.14337	1.00087
ENSG00000228680	AC004692.4		7	43278665	43288867	4.39881	0	0.434489	0	0	0	0	6.74597	0	0	0	4.23431	0	4.19879	18.2532	13.6327	0	0	0
ENSG00000249106	RP11-806K15.1		4	176711458	176733340	2.31414	0.937715	8.3196	0	23.3356	0	0	2.4261	0	9.26836	0	0	0	2.07297	0	0	0	2.20226	0.972072
ENSG00000246044	AL138781.1		9	139006434	139010514	4.39881	4.6379	8.04525	0	0	0	0	0.536037	0	0	18.6822	0	0	3.03462	0	0	8.6253	0	3.83117
ENSG00000224984	RP11-524H19.2		6	54704916	54705653	4.46318	2.66236	1.71871	0	0	0	0	0.559131	0	0	18.6822	5.6013	0	4.4134	0	13.6327	0	0	0
ENSG00000239653	RP11-245J9.2		3	63989698	63997824	4.96847	8.27834	0.738616	0	0	0	0	0.31496	0	18.5467	0	0	7.80543	2.91465	0	0	0	2.14337	6.00219
ENSG00000240310	RP11-24F11.5		3	46451005	46454488	6.99259	1.93321	3.87874	0	0	0	15.0811	3.41328	0	0	0	0	0	16.4371	0	0	0	2.9228	0.988553
ENSG00000246981	AL139044.1		6	33599094	33601413	4.96847	8.10699	1.75673	0	0	0	0	4.51786	20.1155	0	0	0	0	3.09279	0	0	0	3.22735	5.84507
ENSG00000224381	AC000035.3		22	29867930	29874059	0	0.934085	0.329139	0	0	0	30.1623	0.363365	0	0	18.6822	0	0	1.10866	0	0	0	0	0
ENSG00000248228	RP13-511O19.1		4	20393812	20396479	0	0	1.28069	0	0	0	0	0	50.2887	0	0	0	0	0	0	0	0	0	0
ENSG00000237714	AC063976.4		5	131520569	131528501	1.09094	5.46887	1.94513	0	11.6678	0	0	2.61381	0	0	18.6822	4.23431	0	3.81299	0	0	0	0	1.92782
ENSG00000253796	RP11-1084E5.1		8	109907258	110075646	4.59941	3.59214	0.333654	0	11.6678	0	0	4.6539	10.0577	0	0	0	0	0.964311	0	13.6327	0	0	1.92782
ENSG00000248964	RP11-94H18.1		8	29672520	29712059	0	7.66584	1.26226	0	11.6678	12.0391	0	1.11137	10.0577	0	0	0	0	3.72815	0	0	0	2.9228	0.972072
ENSG00000250092	RP11-556G22.3		4	21583719	21615351	5.69036	2.15128	1.2422	0	11.6678	0	0	1.48669	0	9.27833	0	0	7.80543	1.67614	0	0	0	7.30581	3.00171
ENSG00000248380	RP11-94C24.3		17	48553180	48555752	4.8178	0.937051	7.64883	0	0	0	0	7.0789	10.0577	9.27833	0	0	0	1.67614	0	0	0	5.84559	3.90077
ENSG00000237074	RP11-6J21.2		1	207422412	207482466	5.00865	2.21238	2.29862	0	0	0	0	3.09269	0	0	0	4.23431	0	6.53676	18.2532	0	8.6253	0	0.972072
ENSG00000229921	NCRNA00300	non-protein coding RNA 300 [Source:HGNC Symbol;Acc:20953]	6	168393502	168397757	3.30786	5.34284	1.27235	13.2216	0	0	0	4.69641	0	0	0	0	0	0.986028	0	13.6327	0	5.84559	2.92042
ENSG00000234996	RP11-480I12.7	actin pseudogene (LOC148709), non-coding RNA [Source:RefSeq DNA;Acc:NR_002929]	1	202830882	202844369	1.76867	9.09166	8.89634	0	0	0	0	0.988279	10.0577	0	0	0	7.80543	7.50476	0	0	0	5.06617	0
ENSG00000245332	AL031427.1		1	54447917	54452234	2.14904	3.35162	5.89941	0	11.6678	12.0391	0	2.09221	0	9.27833	0	0	0	1.75363	0	0	0	0	2.82591
ENSG00000237399	RP11-298E9.3		10	3183864	3204580	0.545472	8.59911	10.5349	0	0	0	0	0.44827	0	0	0	0	0	1.94071	0	13.6327	8.6253	4.69515	2.01316
ENSG00000249917	AF130342.1		8	116962736	117337297	0	4.59337	2.251	0	11.6678	0	0	0.386784	10.0577	0	0	0	0	1.93559	18.2532	0	0	0	1.83736
ENSG00000224057	RP5-1091E12.1		7	55247443	55256627	9.21661	1.99232	6.63492	0	0	0	0	10.9406	0	9.26836	0	0	0	6.88443	0	0	0	5.05123	0.972072
ENSG00000234464	RP11-136B18.2		1	238439337	238450316	0	2.77719	3.33304	0	0	12.0391	0	0.956623	30.1732	0	0	0	0	1.67614	0	0	0	0	0
ENSG00000235609	AF127936.7		21	16195290	16254296	0.545472	7.41099	2.6108	0	11.6678	0	0	3.69753	0	9.27833	0	0	0	0.9764	0	0	8.6253	5.10355	0.972072
ENSG00000131797	KIAA0664L3	KIAA0664-like 3 [Source:HGNC Symbol;Acc:28447]	16	31711911	31718758	7.90728	9.02651	2.14696	0	11.6678	0	0	0.806442	0	0	0	0	0	0.986028	18.2532	0	0	0	0
ENSG00000256576	RP13-977J11.2		12	132671287	132674240	2.66876	0.934085	1.07396	0	0	0	0	0.326856	20.1155	0	0	5.6013	0	4.84644	0	0	0	2.55178	12.6667
ENSG00000233219	RP11-89N17.3		7	33908113	33913843	0	0	0	0	0	0	0	49.7395	0	0	0	0	0	0.986028	0	0	0	0	0
ENSG00000246640	RP11-1094H24.4		17	48127713	48133103	4.62827	4.46721	0.654935	0	0	0	15.0811	5.77243	0	0	0	5.6013	0	8.37629	0	0	0	2.20226	3.90008
ENSG00000225135	RP11-361F15.2		6	147708800	147711601	13.8633	0	2.04668	0	0	0	0	1.12013	0	9.27833	0	0	0	11.6877	0	0	8.6253	2.14337	1.85891
ENSG00000249375	RP11-1136L8.1		8	128698588	128746213	3.30786	0.937051	1.60327	0	0	0	0	1.28777	0	0	37.3643	4.23431	0	1.86338	0	0	0	0	0
ENSG00000244649	CTD-2377D24.6		17	46782565	46784708	0	0	0.74482	0	23.3356	0	0	3.1195	0	0	0	0	0	11.878	0	0	8.6253	0	2.80943
ENSG00000254130	CTB-7E3.1		5	166332227	166353375	0	0	0.404962	13.2216	0	12.0391	0	6.2401	10.0577	0	0	0	0	4.65353	0	0	0	0	3.88845
ENSG00000232719	RP11-13J8.1		2	201966105	201967859	3.21423	3.28665	2.57729	0	0	12.0391	0	0.606073	20.1155	0	0	0	0	0	0	0	8.6253	0	0
ENSG00000235532	RP11-459P23.1		13	74805594	74834113	0.545472	10.5789	4.83465	0	0	0	0	0	0	0	0	0	15.6109	0	0	0	0	14.0481	4.80926
ENSG00000228037	RP3-395M20.9		1	2512999	2515972	0	0	1.76851	0	0	0	0	1.31389	0	0	0	5.6013	0	5.12063	18.2532	0	17.2506	0	1.00087
ENSG00000236095	RP11-49O14.2		9	97662711	97667036	0	3.43711	4.24156	0	0	0	0	1.94447	0	0	0	4.23431	0	0	18.2532	13.6327	0	2.55178	1.98942
ENSG00000232295	RP11-154D6.1		6	71961061	72037787	0	0.996159	6.13331	0	0	0	0	14.9837	0	0	0	5.6013	7.80543	6.05601	0	0	0	4.75403	3.90897
ENSG00000237187	RP11-65F13.2		5	92746995	92921354	4.59941	4.47347	1.88335	0	0	0	0	1.94065	0	0	0	8.46862	8.43497	2.97204	0	0	0	17.454	0
ENSG00000227744	AC114788.2		2	239840998	239847965	5.58697	1.41409	1.9109	0	0	0	0	11.0321	0	18.5467	0	5.6013	0	3.16688	0	0	0	0	2.92526
ENSG00000249093	AC135050.2		16	31052374	31054276	1.09094	5.00031	0.677248	13.2216	0	0	0	1.27304	0	0	0	4.23431	0	1.16417	0	0	0	0	23.5143
ENSG00000233862	AC016907.3		2	30273932	30366670	6.16747	2.34818	1.09277	0	0	0	0	5.80837	10.0577	0	0	0	0	4.47593	0	13.6327	0	2.55178	3.92107
ENSG00000246283	AC090510.1		15	43029401	43034389	0.545472	0.902423	4.24468	0	0	0	0	9.99634	0	0	0	14.0699	8.43497	10.7923	0	0	0	0	0.972072
ENSG00000256568	RP11-800A3.3		11	72887739	72892741	0	0	0	26.4431	0	12.0391	0	0	10.0577	0	0	0	0	1.2943	0	0	0	0	0
ENSG00000225564	RP11-341A22.2		9	105902805	106087316	0	0	4.46431	0	0	0	15.0811	1.98969	0	0	0	0	7.80543	1.86338	0	0	0	14.6247	4.00258
ENSG00000226239	RP1-310O13.7		20	30615556	30619378	0	0	0.821567	0	0	0	45.2434	0	0	0	0	0	0	3.72675	0	0	0	0	0
ENSG00000224247	AJ009632.3		21	16866251	16868443	12.356	0	2.63864	0	0	0	0	2.61007	10.0577	0	0	0	7.80543	2.09469	0	0	0	5.4296	6.73325
ENSG00000234665	RP11-262H14.3		9	66523532	66553911	4.96847	1.8741	2.17317	0	0	0	0	1.3447	20.1155	0	0	0	0	0.964311	18.2532	0	0	0	0
ENSG00000256146	RP11-319E16.2		12	5425127	5428513	3.30786	7.60564	18.5671	0	11.6678	0	0	0.326856	0	0	0	0	0	0.964311	0	0	0	7.24693	0
ENSG00000255435	RP11-770J1.3		11	118382626	118401292	0	1.79013	0	0	0	0	0	1.99776	0	0	37.3643	0	0	1.10866	0	0	0	5.45963	1.85891
ENSG00000186615	C14orf33	chromosome 14 open reading frame 33 [Source:HGNC Symbol;Acc:19842]	14	56024690	56046828	0	2.13012	4.74933	0	0	0	0	0.45502	10.0577	0	0	0	8.43497	3.07109	0	13.6327	0	5.05123	1.93671
ENSG00000248003	AL356356.4		1	150565059	150590027	1.63641	5.58132	1.07847	13.2216	0	0	0	2.54005	0	0	0	0	0	5.44601	0	0	8.6253	5.47457	5.70189
ENSG00000241732	RP11-38P22.2		3	152557179	152559228	5.39612	0	3.18606	13.2216	0	0	0	3.14682	0	9.27833	0	4.23431	0	8.89948	0	0	0	0	1.92782
ENSG00000251230	RP11-701P16.5		4	185765739	185776905	0	0.887708	0	0	0	0	0	0.765645	0	0	18.6822	0	0	0	0	0	0	5.47457	23.4357
ENSG00000254281	KB-1507C5.4		8	103991013	104012412	0.545472	3.30659	5.32247	0	0	0	0	10.1216	0	0	0	4.23431	0	7.23946	0	0	0	5.11011	13.3063
ENSG00000236372	RP5-865N13.1		1	232310678	232315859	2.72736	7.50362	15.998	0	0	0	0	2.7045	10.0577	0	0	5.6013	0	0	0	0	0	2.55178	1.85891
ENSG00000232623	AP000266.7		21	33678775	33681048	0	4.54741	4.41242	0	0	12.0391	0	2.27269	0	0	0	5.6013	7.80543	4.42303	0	0	0	2.9228	4.8483
ENSG00000227199	ST7-AS1	ST7 antisense RNA 1 (non-protein coding) [Source:HGNC Symbol;Acc:16000]	7	116592500	116594388	0	4.90246	2.11425	13.2216	0	12.0391	0	0.44827	0	0	0	0	0	0.789322	0	0	8.6253	4.69515	1.98819
ENSG00000226899	RP11-298J20.3		10	126633773	126635001	3.21423	5.64286	0.738616	0	11.6678	0	0	4.31393	0	0	0	0	0	1.16417	0	0	8.6253	4.69515	8.75762
ENSG00000234465	AC006276.1		19	44084790	44088106	6.48706	0	7.16891	0	0	0	0	6.18206	0	0	0	0	0	0.964311	18.2532	0	8.6253	0	0.98371
ENSG00000237921	AC004543.2		7	19853308	19857713	0	1.41409	0.226462	0	11.6678	0	0	3.89	20.1155	0	0	0	7.80543	1.67614	0	0	0	0	1.85891
ENSG00000229127	AC007038.7		2	210895457	210929080	0	1.11618	15.3768	0	11.6678	0	0	0.336035	20.1155	0	0	0	0	0	0	0	0	0	0
ENSG00000234690	AC073283.4		2	47419544	47572213	0	1.11618	0	0	11.6678	0	0	0.326856	0	0	0	8.46862	0	0	18.2532	0	8.6253	0	0
ENSG00000255521	RP4-607I7.1		11	35154202	35159579	0.545472	2.17775	2.07237	0	11.6678	0	0	1.92508	0	0	18.6822	0	0	2.45847	0	0	0	0	8.83558
ENSG00000229618	AC011288.2		7	13141016	13743774	0.545472	0.937051	0	39.6647	0	0	0	2.53002	0	0	0	0	0	4.67525	0	0	0	0	0
ENSG00000230623	RP11-469A15.2		1	200443048	200447421	2.69451	5.66508	4.86068	0	0	0	30.1623	0.99089	0	0	0	0	0	0.9764	0	0	0	0	2.97291
ENSG00000248428	CTC-551A13.1		5	110306650	110344598	0	1.97282	0.416605	0	0	0	0	1.34509	0	27.825	0	0	0	3.82508	0	0	8.6253	4.28675	0
ENSG00000248319	RP11-205M3.3		4	170838912	170897053	1.09094	0	5.20627	0	0	0	0	0.935345	0	9.26836	18.6822	4.23431	0	5.01036	0	0	0	0	3.86453
ENSG00000240990	HOXA11-AS1	HOXA11 antisense RNA 1 (non-protein coding) [Source:HGNC Symbol;Acc:24957]	7	27224137	27228912	1.76867	1.41409	0.599131	0	11.6678	0	0	1.56617	0	0	0	4.23431	8.43497	1.2943	0	0	17.2506	0	0
ENSG00000248730	CTD-2022B6.1		5	38282366	38291088	2.14904	2.47597	1.4373	0	0	0	0	2.3152	0	0	0	0	8.43497	22.1583	0	0	0	2.55178	6.70311
ENSG00000179406	NCRNA00174	non-protein coding RNA 174 [Source:HGNC Symbol;Acc:27788]	7	65841031	65866325	4.39881	3.20854	1.87268	0	0	0	0	4.64164	20.1155	0	0	0	8.43497	3.6637	0	0	0	0	1.85891
ENSG00000235823	NCRNA00263	non-protein coding RNA 263 [Source:HGNC Symbol;Acc:28060]	10	102133372	102143125	3.27283	1.77542	5.69039	0	0	0	0	10.9561	0	0	0	0	0	3.88908	18.2532	0	0	4.28675	0
ENSG00000233593	RP4-665J23.1		1	91295104	91317207	1.09094	1.24827	2.10689	0	0	0	15.0811	0.966412	0	0	0	0	15.6109	10.0311	0	0	0	0	1.97294
ENSG00000256654	RP11-429A20.4		12	5132848	5134758	5.36327	3.08017	1.19826	13.2216	11.6678	0	0	0.301018	0	0	0	0	0	1.93559	0	0	0	2.55178	8.78885
ENSG00000226387	RP11-483B5.3		10	106424368	106425974	2.72736	2.16304	1.4744	0	0	0	0	2.79525	0	0	0	0	8.43497	2.82769	0	0	8.6253	18.025	1.01229
ENSG00000205622	AF064858.6		21	40249215	40328392	5.69036	4.63252	4.03259	0	0	0	0	2.79935	20.1155	0	0	0	0	5.82574	0	0	0	0	4.98506
ENSG00000228189	RP13-60M5.2		9	91242111	91267075	2.66876	3.28819	2.64849	13.2216	11.6678	0	0	0.910041	0	0	0	12.7029	0	0.964311	0	0	0	0	0
ENSG00000231890	AC093391.2		2	136742746	136774099	0	2.16304	0.333654	13.2216	0	0	0	0.889339	30.1732	0	0	0	0	1.16417	0	0	0	0	0
ENSG00000253675	CTD-3118D11.2		8	87111194	87166454	1.09094	1.80485	1.04992	0	0	0	0	3.87277	0	9.27833	0	18.3042	0	3.85078	0	0	8.6253	0	0
ENSG00000227189	AC092535.3		4	1145160	1147489	0.545472	10.1227	1.67343	0	0	0	0	0	0	18.5467	0	0	0	3.22026	0	0	0	0	13.6396
ENSG00000229481	AC016582.1	WD repeat domain 87 pseudogene (LOC728853), non-coding RNA [Source:RefSeq DNA;Acc:NR_033747]	19	38320191	38322797	4.33093	0.887708	1.05967	0	0	0	0	4.35094	0	9.26836	0	0	0	6.47205	0	0	17.2506	2.14337	1.98436
ENSG00000233080	CTA-714B7.5		22	35515817	35627049	0.545472	0.937051	1.38904	0	11.6678	0	0	0.782291	20.1155	0	0	4.23431	0	3.72675	0	0	0	4.28675	0
ENSG00000250619	CTD-2215L10.1		5	9001886	9046052	0	0	1.0103	0	0	0	0	4.25885	10.0577	0	18.6822	0	0	0	0	13.6327	0	0	0
ENSG00000235326	RP11-509J21.3		9	3674546	3691814	2.69451	0	0	0	0	0	0	1.34341	10.0577	0	18.6822	0	0	2.83978	0	0	0	11.9957	0
ENSG00000236447	RP11-356D23.3		5	81287814	81288300	0	1.8718	1.33832	0	11.6678	0	15.0811	0.520463	0	0	0	0	7.80543	5.14691	0	0	0	2.14337	2.00084
ENSG00000231789	RP11-558F24.4		1	9739858	9747632	0	0.902423	10.4699	0	0	0	0	3.57315	0	0	0	0	15.6109	0	0	0	8.6253	8.36749	0
ENSG00000249490	CTD-2333M24.1		5	20612734	20614874	2.66876	1.2277	6.17207	0	0	0	0	0	10.0577	0	0	9.83561	0	7.45351	0	0	0	9.04306	1.01229
ENSG00000232555	AC104088.1		2	173180015	173188465	0	0.937715	2.95969	13.2216	0	0	0	1.69451	0	0	18.6822	0	0	0.986028	0	0	0	8.9819	0
ENSG00000236449	AC018890.6		2	175411869	175639555	1.09094	10.4389	5.77102	13.2216	0	0	0	2.04116	0	0	0	0	0	3.03728	0	0	8.6253	3.22735	0
ENSG00000236682	AC068282.3		2	128146706	128158156	1.09094	0	2.74633	0	0	0	0	4.91918	10.0577	9.26836	0	0	0	8.86761	0	0	8.6253	0	1.83736
ENSG00000196566	RP11-57C13.3		10	89369920	89419760	3.21423	0.887708	0.450786	0	11.6678	0	0	1.76585	0	0	18.6822	0	0	3.06002	0	0	0	5.84559	1.83736
ENSG00000254501	AP003068.9		11	64878186	64879167	5.69036	1.03511	0	0	11.6678	0	0	0.894617	0	9.26836	0	0	0	5.20512	0	13.6327	0	0	0
ENSG00000253300	RP11-108E14.1		8	20513202	20557645	0.545472	6.32498	2.66193	13.2216	0	0	0	1.38624	0	0	0	0	7.80543	0	0	0	8.6253	5.77912	1.00087
ENSG00000254438	RP11-231N3.1		11	13942997	13946410	3.85333	1.2277	0.637627	13.2216	0	0	0	2.88579	0	0	0	0	8.43497	11.5912	0	0	0	2.55178	2.90878
ENSG00000253284	RP11-282K24.3		12	19300008	19307593	0	0	0.226462	39.6647	0	0	0	0.31496	0	0	0	0	0	2.5282	0	0	0	2.55178	2.00084
ENSG00000230699	RP11-54O7.1		1	846815	850328	4.85065	2.69018	7.64111	0	0	0	15.0811	2.22384	0	0	0	5.6013	0	0	0	0	0	5.05123	3.97795
ENSG00000203499	RP11-429J17.6		8	144816310	144828507	3.21423	1.86817	1.63923	0	0	0	0	12.6892	0	0	0	0	23.4163	0	0	0	0	4.28675	0
ENSG00000231638	AC011738.4		7	43548327	43562141	3.30786	0.902423	4.17044	0	0	0	0	8.21798	10.0577	0	0	0	0	2.1502	18.2532	0	0	0	0
ENSG00000251002	AE000661.37		14	22849083	22951948	2.69451	3.86405	0	0	11.6678	0	0	0.469706	0	0	18.6822	0	8.43497	0.964311	0	0	0	0	0
ENSG00000238204	AC012354.4		2	45148216	45166338	0	0.902423	0.452924	0	0	0	0	1.96312	0	0	0	4.23431	0	30.5614	0	0	8.6253	0	0
ENSG00000100181	AC005301.5	TPTE pseudogene (psiTPTE22), non-coding RNA [Source:RefSeq DNA;Acc:NR_001591]	22	17082801	17134699	0.545472	1.82179	4.66427	0	0	0	0	2.02273	0	9.27833	18.6822	0	0	5.02105	0	0	0	4.69515	0
ENSG00000234111	RP11-364P22.1		4	158493642	158497306	0.545472	2.31651	2.58479	0	11.6678	0	0	2.38168	0	0	0	0	16.8699	2.72491	0	0	0	0	7.61508
ENSG00000224790	AP000704.5		21	38338812	38344128	0.545472	1.41409	0.879259	0	0	24.0781	0	1.7035	0	0	0	0	0	0.789322	0	0	17.2506	0	0
ENSG00000228504	RP4-586O15.1		1	95776484	95783819	3.40508	0	0.416605	0	0	0	0	0	20.1155	0	0	0	0	1.86338	18.2532	0	0	2.55178	0
ENSG00000226852	RP1-212P9.2		1	29194087	29197779	0.545472	3.08774	3.47949	0	0	0	0	1.8342	10.0577	0	0	4.23431	8.43497	1.2943	0	13.6327	0	0	0
ENSG00000233643	RP11-491H19.1		10	63541514	63581004	0	3.43063	1.83173	0	23.3356	12.0391	0	1.16981	0	0	0	0	0	3.75976	0	0	0	0	1.01229
ENSG00000232233	RP11-573D15.2		3	186528669	186543310	4.43742	5.59889	3.66961	0	11.6678	0	0	3.24611	0	0	0	4.23431	7.80543	3.93475	0	0	0	0	1.94414
ENSG00000228352	RP11-537H15.3		9	34084330	34096676	3.21423	4.91078	2.26244	0	0	0	0	2.48953	10.0577	0	0	0	0	2.08506	0	13.6327	0	2.9228	4.96132
ENSG00000189149	NCRNA00169	non-protein coding RNA 169 [Source:HGNC Symbol;Acc:34405]	16	21312170	21329912	0	2.49654	0.226462	0	0	0	0	0.525975	0	9.27833	18.6822	0	0	4.01285	0	0	0	8.39737	2.90878
ENSG00000228742	RP5-884M6.1		7	106415457	106436010	3.7597	0.902423	2.08567	0	0	12.0391	0	0.732934	0	18.5467	0	0	0	4.18457	0	0	0	3.22735	1.00087
ENSG00000215560	TTTY5	testis-specific transcript, Y-linked 5 (non-protein coding) [Source:HGNC Symbol;Acc:16482]	Y	24442945	24445023	0	1.84014	1.18489	0	11.6678	0	0	1.98869	0	0	0	5.6013	0	3.03462	0	0	8.6253	4.69515	7.78825
ENSG00000231566	RP5-1158E12.3		X	45707328	45710920	0.545472	1.03511	1.22107	13.2216	0	0	0	1.80392	0	0	0	9.83561	0	0.986028	0	0	8.6253	9.07294	0
ENSG00000248515	RP11-608O21.1		4	19457059	19911315	2.69451	7.16355	2.25687	0	11.6678	0	0	0.386784	0	0	0	5.6013	7.80543	2.27283	0	0	0	6.45469	0
ENSG00000251183	AC091962.3		5	153266988	153278547	0	0	0	0	0	0	0	0.525975	30.1732	0	0	0	0	1.9528	0	13.6327	0	0	0
ENSG00000233997	AP000475.2		21	23119293	23169735	1.09094	0	0.226462	13.2216	0	0	0	0.793993	0	0	0	0	0	12.693	18.2532	0	0	0	0
ENSG00000224413	AP001476.2		21	47456966	47459721	0	2.35114	0.677248	13.2216	0	0	0	3.14113	10.0577	0	0	4.23431	0	0.986028	0	0	8.6253	0	2.96829
ENSG00000227733	RP4-565E6.1		1	146093234	146159102	5.36327	2.1154	0.416605	13.2216	0	0	0	9.05246	10.0577	0	0	4.23431	0	0.789322	0	0	0	0	0.98371
ENSG00000215869	RP11-364B6.1	THAP domain containing, apoptosis associated protein 3 pseudogene (LOC100129138), non-coding RNA [Source:RefSeq DNA;Acc:NR_033990]	1	104615645	104619709	3.27283	7.08761	3.54074	0	0	24.0781	0	0	0	0	0	0	0	3.56713	0	0	0	2.55178	1.98819
ENSG00000254211	CTB-43E15.4		5	173213793	173236042	3.40508	5.63102	2.97782	0	0	0	0	3.50463	10.0577	0	0	4.23431	0	4.81183	0	0	0	7.60301	3.79798
ENSG00000230815	RP11-49O14.3		9	97586554	97587055	0	2.81315	0.411165	0	0	24.0781	0	0	0	0	18.6822	0	0	0	0	0	0	0	0
ENSG00000254007	RP11-281H11.1		8	5517201	5527599	0	3.61193	0	0	0	0	0	0	0	0	37.3643	0	0	2.24386	0	0	0	2.55178	0
ENSG00000227893	RP11-760M1.3		13	24072935	24077013	4.44875	10.8797	1.51689	0	11.6678	0	0	0.765929	0	0	0	4.23431	0	0.964311	0	0	0	11.2537	0
ENSG00000225882	RP3-410B11.1		X	17988317	18122764	3.23998	4.16988	3.92078	0	0	0	15.0811	11.7378	0	0	0	0	0	5.01609	0	0	0	2.55178	0
ENSG00000225511	C9orf44	chromosome 9 open reading frame 44 [Source:HGNC Symbol;Acc:23569]	9	94903580	94921890	5.83704	2.05026	4.89841	0	0	0	0	6.16468	0	0	0	0	0	2.71528	0	0	8.6253	2.55178	12.8205
ENSG00000223357	AC068620.1		4	57276808	57289623	3.85333	0.996159	5.98989	0	0	0	0	3.03551	0	0	0	4.23431	8.43497	4.98811	0	0	0	11.2752	2.84746
ENSG00000255118	RP11-703H8.7		11	62104383	62105562	0.545472	3.12007	0.763628	13.2216	0	0	0	2.07247	0	9.27833	0	0	0	6.57056	0	0	0	2.14337	7.74336
ENSG00000256392	RP11-347I19.3		12	122217514	122241309	0.545472	2.17775	1.01574	0	11.6678	0	0	1.89012	0	0	0	0	0	3.38899	18.2532	0	0	2.55178	3.88845
ENSG00000223492	RP11-15M15.1		20	51785182	51796089	2.29971	1.24827	9.76414	0	0	0	0	1.52915	0	0	0	4.23431	0	0	0	0	8.6253	8.01797	9.65947
ENSG00000255311	RP11-160H12.2		11	83354645	83436433	2.18189	1.93024	7.62435	0	0	0	0	3.99442	0	0	0	11.2026	7.80543	0.9764	0	0	8.6253	0	1.00087
ENSG00000243698	RP11-574K11.18		10	75570442	75571556	2.14904	0	2.05893	0	0	12.0391	0	1.21179	0	0	0	0	8.43497	2.89027	0	13.6327	0	2.9228	0
ENSG00000227734	RP11-49L2.1		10	19579152	19580409	10.4691	0	3.57666	0	0	0	0	1.14022	10.0577	0	0	5.6013	7.80543	4.73776	0	0	0	0	1.93671
ENSG00000255801	RP11-561P12.5		12	8700957	8720209	1.09094	2.81182	1.69516	0	0	0	0	0	10.0577	0	0	11.2026	0	1.16417	0	0	17.2506	0	0
ENSG00000254416	RP11-347E10.1		11	110225855	110277124	0	1.8741	1.26905	0	0	24.0781	0	3.87045	0	9.26836	0	0	0	0.789322	0	0	0	2.20226	1.83736
ENSG00000225032	RP11-228B15.4		9	130578345	130584799	1.09094	1.87543	4.71998	0	0	0	0	0.6753	10.0577	0	0	4.23431	0	3.18163	18.2532	0	0	0	1.01229
ENSG00000231367	AC016995.3		2	38633861	38742882	2.29971	0	0.404962	13.2216	0	0	0	0.326856	20.1155	0	0	0	0	0	0	0	8.6253	0	0
ENSG00000237152	DLEU7-AS1	DLEU7 antisense RNA 1 (non-protein coding) [Source:HGNC Symbol;Acc:39966]	13	51381992	51423145	6.91355	8.03348	0.984074	0	0	0	0	2.2921	0	0	0	0	15.6109	1.75363	0	0	0	9.37749	0
ENSG00000249699	RP11-415C15.2		4	27219101	27283847	0	0.887708	0	0	0	0	0	2.91139	0	0	0	0	16.2404	4.80853	18.2532	0	0	0	1.85891
ENSG00000245602	AC073548.1		19	47987539	47999639	2.66876	0	0	0	0	0	0	0.268018	0	0	0	0	7.80543	6.98503	0	0	0	0	27.2313
ENSG00000248233	AL513122.1		9	124053715	124057566	5.622	2.82969	0.677248	0	0	0	0	3.04517	0	0	0	0	0	0.964311	18.2532	0	8.6253	0	4.89697
ENSG00000247809	AC016251.2		15	96812001	96870577	1.09094	7.07955	8.23497	0	11.6678	0	0	5.26357	0	0	0	0	0	0.789322	0	0	0	8.75345	1.98819
ENSG00000230534	RP11-297A16.2		10	35386934	35415948	0.545472	8.36144	0.889255	0	0	0	0	3.04781	0	0	0	0	0	3.51936	0	13.6327	0	5.84559	8.89848
ENSG00000251381	CTC-497E21.4		11	12984057	13011095	0	4.39903	2.87041	0	0	0	0	3.28394	10.0577	0	0	0	0	0	18.2532	0	0	5.84559	0
ENSG00000223385	COX10-AS1	COX10 antisense RNA 1 (non-protein coding) [Source:HGNC Symbol;Acc:38873]	17	13932609	13972775	5.55412	2.16304	6.05085	0	0	0	0	2.10938	0	0	0	0	0	4.50382	18.2532	0	0	5.05123	0.972072
ENSG00000246350	RP5-1186N24.3		6	28555155	28559524	0	2.82969	1.04992	0	0	12.0391	0	5.26932	0	0	0	4.23431	0	0	0	0	17.2506	0	1.98436
ENSG00000247373	RP11-486O12.2		12	124066767	124069662	0	2.5349	0.442697	26.4431	0	0	0	0	0	0	0	4.23431	0	2.32834	0	0	8.6253	0	0
ENSG00000255438	CTD-2653D5.1		20	46306645	46315041	0	3.04642	0	13.2216	11.6678	0	0	5.55892	10.0577	0	0	0	0	0	0	0	0	0	0.972072
ENSG00000229720	RP3-495K2.2		6	169434292	169435737	11.9369	0.996159	0.434489	0	0	0	0	3.31072	0	0	0	11.2026	0	14.4982	0	0	0	2.14337	0
ENSG00000240859	AC093627.10		7	149597	155465	0	3.04949	1.48931	0	0	12.0391	0	0.968673	10.0577	9.26836	0	0	0	1.2943	0	0	0	3.22735	2.84746
ENSG00000229124	RP11-124N14.4		10	17256238	17268897	0	0.887708	0.895621	0	0	0	0	26.2558	0	0	0	0	0	0	0	0	8.6253	0	7.54678
ENSG00000229791	RP11-385E5.5		13	19982182	19983669	1.63641	1.27533	0.662793	0	0	0	30.1623	0.363365	10.0577	0	0	0	0	0	0	0	0	0	0
ENSG00000250116	RP11-417F21.1		2	46795395	46807377	9.59674	3.59214	0	0	0	0	15.0811	1.99366	0	0	0	0	7.80543	6.00917	0	0	0	0	0
ENSG00000242428	RP11-147N17.1		3	58810163	59004819	0	14.4122	0	0	0	0	0	2.15525	0	0	0	4.23431	0	1.97206	0	0	8.6253	11.4963	1.01229
ENSG00000236859	AC018737.1		2	122407226	122485784	6.84519	0	2.96998	0	0	0	0	1.8486	20.1155	0	0	0	0	0.986028	0	0	0	7.26843	3.83117
ENSG00000225083	GRTP1-AS1	GRTP1 antisense RNA 1 (non-protein coding) [Source:HGNC Symbol;Acc:39917]	13	114005988	114016183	2.14904	0	0	13.2216	0	0	0	2.05913	0	0	0	4.23431	0	0.986028	0	0	17.2506	0	3.89249
ENSG00000251384	AC018755.1	microRNA 125a (MIR125A), microRNA [Source:RefSeq DNA;Acc:NR_029693]	19	52188616	52196709	0	9.9353	1.03639	0	0	0	0	0.480446	10.0577	0	0	0	0	2.97204	18.2532	0	0	0	0.988553
ENSG00000235703	RP13-507I23.1		X	149106846	149392815	0	3.80798	0	0	0	0	0	4.70693	10.0577	0	0	4.23431	0	4.31201	0	0	8.6253	5.05123	2.90878
ENSG00000249549	AL589182.1		14	19858667	19941024	0	5.76341	0.555601	0	0	0	0	0	0	0	37.3643	0	0	0	0	0	0	0	0
ENSG00000231453	AC018470.4		2	175190755	175195371	0	2.35181	1.06944	13.2216	0	0	0	0.604053	0	0	0	5.6013	0	0	0	0	8.6253	11.1842	1.01229
ENSG00000223871	AL035562.1		20	21591425	21684223	0	1.86817	0.89377	13.2216	11.6678	0	0	5.27566	0	0	0	0	0	2.64045	0	0	0	4.28675	3.80305
ENSG00000225177	RP11-390P2.4		6	139013685	139018425	9.54369	0.887708	0.816127	0	0	0	0	0.811057	0	0	18.6822	0	7.80543	0	0	0	0	2.20226	2.84965
ENSG00000253470	RP11-697B24.1		8	126761299	126762485	0	0	0.901572	13.2216	0	0	0	2.50872	20.1155	0	0	0	0	3.99186	0	0	0	0	2.83098
ENSG00000226985	RP11-142G7.2		X	13353360	13391753	1.09094	0	0.825593	0	0	0	0	4.20748	0	9.27833	0	5.6013	7.80543	3.56713	0	0	8.6253	2.55178	0
ENSG00000246627	RP11-885B4.3		12	2785167	2800366	1.09094	4.27511	0.404962	0	0	0	0	1.10591	0	0	18.6822	0	0	3.20335	0	0	0	2.90786	11.8248
ENSG00000234184	RP5-887A10.1		1	81001440	81112473	2.29971	0	0.599131	0	0	0	0	1.58601	0	0	0	4.23431	8.43497	0	18.2532	0	0	4.34563	3.71782
ENSG00000254197	RP11-10J21.5		8	142288327	142302961	0	5.9308	0.885393	0	0	0	0	0.6753	10.0577	0	0	5.6013	0	2.05822	18.2532	0	0	0	0
ENSG00000225708	RP13-379L11.1		20	56644110	56647126	4.43742	1.24827	1.89569	0	11.6678	0	0	1.16316	0	0	18.6822	0	0	2.2707	0	0	0	0	2.00084
ENSG00000224596	RP11-202P11.1		10	80703085	80828817	0	0	0	0	23.3356	0	0	0	0	0	18.6822	0	0	1.2943	0	0	0	0	0
ENSG00000249478	CTB-49A3.5		5	132579456	132584473	3.30786	2.83563	1.43937	0	0	0	0	8.68453	0	0	0	0	0	3.18163	18.2532	0	0	5.45963	0
ENSG00000254049	RP11-468C1.1		8	32298262	32300241	2.29971	0	0.329139	0	0	0	15.0811	0.45502	0	0	0	0	8.43497	1.16417	0	0	0	2.55178	12.8221
ENSG00000229699	RP1-140J1.1		1	153146994	153164152	2.29971	0.996159	0.599131	0	11.6678	0	0	2.7726	10.0577	0	0	0	0	1.10866	0	13.6327	0	0	0
ENSG00000223842	RP11-135J2.3		1	219395590	219398839	2.29971	1.41409	1.61314	0	0	0	0	2.78927	10.0577	0	0	0	0	4.72038	18.2532	0	0	0	1.98458
ENSG00000251632	RP11-714L20.1		4	138466885	138524584	12.7508	0.937715	0	0	0	0	0	4.78542	0	0	0	0	0	17.3295	0	0	0	7.30581	0
ENSG00000253385	KB-1254G8.1		8	103866683	103868303	0.545472	10.7901	4.29477	0	0	0	0	2.49798	0	0	0	0	0	10.4344	0	0	8.6253	0	5.86475
ENSG00000243926	RP11-791I24.4		3	156389651	156392167	0	1.24827	2.56677	0	0	0	0	0	0	0	37.3643	0	0	1.86338	0	0	0	0	0
ENSG00000248470	AL356752.1		13	113517894	113521222	0	0	37.8916	0	0	0	0	0.291113	0	0	0	0	0	0	0	0	0	2.9228	1.85891
ENSG00000235407	RP11-470L19.2		1	111030302	111032880	0	6.13431	1.08391	13.2216	0	0	0	0.980319	0	0	18.6822	0	0	2.84941	0	0	0	0	0
ENSG00000236088	AC015842.1		17	13679951	13695867	0.545472	0	0.442697	26.4431	0	0	0	1.49402	0	0	0	4.23431	0	3.45149	0	0	0	4.34563	1.93671
ENSG00000245025	RP11-875O11.1		8	22842109	22876848	8.24863	1.03511	1.76679	0	0	0	0	2.05049	0	0	0	0	0	4.37933	18.2532	0	0	6.1352	0.972072
ENSG00000244151	RP11-148K1.12		7	150771829	150773617	0	0.934085	0.599131	0	0	0	0	1.78975	0	0	37.3643	0	0	2.05822	0	0	0	0	0
ENSG00000230831	AC007349.7		7	36878577	36880978	4.39881	7.82787	0.669159	0	0	0	0	1.56276	10.0577	0	0	0	0	5.80181	0	0	0	6.45469	5.94587
ENSG00000250592	RP11-39E3.3		3	130618258	130648820	0	0	0	0	0	0	0	0	0	0	0	0	0	40.1211	0	0	0	2.55178	0
ENSG00000253973	RP11-467K18.2		11	9025709	9086701	2.66876	3.82153	2.11921	0	11.6678	0	0	0.594875	0	0	18.6822	0	0	1.10866	0	0	0	0	1.98819
ENSG00000251205	CTD-2050E21.2		5	142938784	142942113	2.29971	3.38404	2.11997	0	0	0	0	0.469706	0	0	0	9.83561	0	0	0	0	8.6253	11.9509	3.85491
ENSG00000253513	RP11-6D1.3		8	126009227	126010440	1.76867	4.05588	0.669159	0	0	0	0	0.31496	0	0	0	9.83561	0	0	0	0	25.8759	0	0
ENSG00000246740	CTD-2382E5.1		15	42264961	42291292	0	0	0.599131	0	11.6678	0	0	6.69901	10.0577	9.26836	0	0	0	0.949559	0	0	0	3.22735	0
ENSG00000235726	AC010148.1		2	235742959	235822028	0	2.1154	1.62956	0	0	0	0	1.40699	10.0577	0	0	0	7.80543	1.10866	18.2532	0	0	0	0
ENSG00000224533	RP11-954J6.3		X	154695631	154841277	7.60594	0.996159	0.226462	0	11.6678	0	0	1.34816	0	0	0	4.23431	0	14.0475	0	0	0	2.20226	0
ENSG00000236823	RP1-249F5.3		6	160320218	160323542	14.3224	0.996159	0.434489	0	0	0	0	0.765929	10.0577	0	0	9.83561	0	5.89734	0	0	0	0	0
ENSG00000235824	RP11-478H13.2		10	29078117	29085042	1.09094	7.50722	7.96963	0	0	0	0	0.455747	0	0	0	0	0	0	0	13.6327	0	8.70192	2.82591
ENSG00000240185	AC008806.2		19	37957641	37960165	6.36808	2.07021	3.38113	0	0	0	0	1.49794	0	0	0	5.6013	0	0.986028	0	13.6327	8.6253	0	0
ENSG00000227215	RP11-445L13__B.3		6	83642320	83648396	0	0.887708	0	39.6647	0	0	0	0.291113	0	0	0	0	0	1.2943	0	0	0	0	0
ENSG00000245884	AC008759.1		19	9732181	9745538	0	1.28663	1.08942	0	0	0	0	1.40811	0	0	0	0	33.1104	3.38149	0	0	0	0	1.83736
ENSG00000205822	RP11-556N21.1		13	25141011	25171814	2.29971	0.996159	0.745744	0	0	0	0	2.0814	0	0	18.6822	0	7.80543	4.40617	0	0	0	0	5.01364
ENSG00000230500	RP11-360I20.2		10	28033715	28056723	0	0	0.757612	0	11.6678	0	0	0.268018	10.0577	0	0	5.6013	0	0	0	13.6327	0	0	0
ENSG00000251396	RP11-163N6.2		8	61297147	61429354	1.76867	0	0	39.6647	0	0	0	0.497911	0	0	0	0	0	0	0	0	0	0	0
ENSG00000225119	RP11-291L22.3		10	38692117	38737700	0	1.41485	3.5524	0	0	0	0	0.464916	0	9.27833	0	0	0	2.08506	0	0	0	8.76839	16.2711
ENSG00000232336	BX571672.3		1	143188828	143189695	0.545472	0.996159	1.00409	0	0	0	0	4.40109	0	0	0	0	7.80543	4.06653	18.2532	0	0	2.9228	1.83736
ENSG00000227740	RP11-318C24.2		1	175873898	175889649	0.545472	0	0	0	0	0	0	0.326856	0	0	0	0	0	1.86338	36.5063	0	0	2.55178	0
ENSG00000241522	AC009223.2		2	41370920	41383954	0	0	0	0	0	0	0	0	0	0	0	0	31.2217	1.86338	0	0	8.6253	0	0
ENSG00000235221	RP11-459J23.1		13	69885465	69896233	4.29808	10.9221	6.04691	0	0	0	0	4.78209	10.0577	0	0	5.6013	0	0	0	0	0	0	0
ENSG00000254266	RP11-594N15.2		8	79338338	79470738	6.06675	3.01476	1.43094	0	11.6678	12.0391	0	1.84077	0	0	0	5.6013	0	0	0	0	0	0	0
ENSG00000227139	RP11-533N14.3		1	147169914	147171461	0.545472	0	1.0103	0	11.6678	0	0	3.1714	0	0	0	4.23431	0	1.75363	18.2532	0	0	0	1.01229
ENSG00000247291	AL645568.1		1	173204199	173446294	7.75661	1.03511	3.19517	13.2216	0	0	0	3.18343	0	0	0	4.23431	0	4.13407	0	0	0	0	4.86062
ENSG00000241219	RP11-572M11.1		3	112769759	112782290	3.21423	2.41101	0.450786	13.2216	0	0	0	0.716288	0	0	18.6822	0	0	0.964311	0	0	0	0	1.93671
ENSG00000213981	AC007277.3		2	171494879	171551884	3.23998	3.72424	0	0	0	0	0	1.91014	10.0577	9.26836	0	0	8.43497	3.947	0	0	0	0	1.01229
ENSG00000224559	AC093838.7		2	132394598	132407188	1.63641	11.3685	3.72246	0	0	12.0391	0	2.88652	0	0	0	4.23431	0	0.789322	0	0	0	2.9228	1.98819
ENSG00000231191	RP11-147I11.2		9	1041219	1042520	2.85961	3.46732	0	13.2216	0	0	0	2.41688	0	9.26836	0	5.6013	0	3.75976	0	0	0	0	0.988553
ENSG00000238217	AC093590.1		2	200472791	200523855	3.91771	5.79616	5.40673	0	11.6678	0	0	1.59582	0	0	0	4.23431	0	6.94967	0	0	0	0	1.98819
ENSG00000234848	CTD-3105H18.7		19	12561749	12571519	0	1.99232	0.411165	0	0	0	0	1.59829	0	0	0	0	0	0	0	27.2654	0	3.22735	7.01571
ENSG00000215246	RP11-43F13.3		5	987295	997423	0	1.24827	0.226462	13.2216	0	0	0	1.76558	0	0	18.6822	4.23431	0	2.09469	0	0	0	0	0
ENSG00000235335	AC016723.4		2	168671284	168797654	0	0.902423	0	13.2216	0	0	0	0	20.1155	0	0	0	0	7.11643	0	0	0	0	0
ENSG00000227165	RP11-323P17.1		10	122521324	122551437	6.61573	2.22368	1.82022	0	0	0	0	0.291113	0	0	0	0	0	3.77082	18.2532	0	0	8.36749	0
ENSG00000239877	RP4-635B5.1		3	118661920	118667071	1.76867	1.82542	1.91099	0	0	0	0	0.899401	30.1732	0	0	0	0	2.7848	0	0	0	0	1.93671
ENSG00000246130	RP11-875O11.2		8	22925742	22941132	4.96847	1.83947	11.4734	0	0	0	0	1.15243	0	0	0	0	0	17.6572	0	0	0	2.20226	1.98819
ENSG00000233620	RP11-22M7.2		1	216245807	216260259	0	3.94436	1.04992	0	11.6678	0	0	2.37121	0	0	0	0	0	2.05822	0	0	17.2506	0	2.93758
ENSG00000248529	RP11-2O17.2		5	60954301	60994259	0	0	0	0	0	0	0	7.96359	0	0	18.6822	0	0	0.986028	0	13.6327	0	0	0
ENSG00000246430	RP11-16M8.2		8	57408805	57472382	4.29808	0	0.560116	0	0	0	0	5.48243	0	0	0	0	8.43497	0	18.2532	0	0	3.22735	0.972072
ENSG00000250271	RP11-64D22.5		3	151515272	151526037	2.66876	3.94511	7.23662	13.2216	0	0	0	2.30791	0	0	0	0	0	3.15767	0	0	8.6253	0	0
ENSG00000248161	RP11-499E18.1		4	103339759	103371167	2.14904	2.70072	4.00112	0	11.6678	0	0	5.64439	10.0577	0	0	0	0	1.67614	0	0	0	3.22735	0
ENSG00000257045	RP11-486F17.1		2	200190033	200194085	3.39065	0	0	0	23.3356	12.0391	0	0.512448	0	0	0	0	0	0	0	0	0	0	1.83736
ENSG00000255523	RP11-780O24.2		11	58684488	58696162	10.4691	0	0	0	0	0	0	12.8847	0	0	0	0	0	9.30107	0	0	0	6.45469	1.98819
ENSG00000228622	RP1-302D9.1		22	33501369	33502045	0.545472	3.92206	0	0	0	12.0391	15.0811	0.779875	0	0	0	0	0	0	0	0	0	8.65695	0
ENSG00000249816	RP11-6D1.6		8	125860979	125966570	2.29971	0	0	0	0	0	0	6.65724	30.1732	0	0	0	0	1.86338	0	0	0	0	0
ENSG00000230433	RP1-20B11.2		6	524171	525581	0.545472	2.31043	0	0	0	0	0	0.469706	0	0	18.6822	0	0	1.2943	0	0	0	11.7318	5.95349
ENSG00000224032	NCRNA00219	non-protein coding RNA 219 [Source:HGNC Symbol;Acc:30749]	5	111496223	111499973	6.54785	1.24827	3.75051	0	0	0	0	0	0	0	18.6822	0	0	2.09469	0	0	8.6253	0	0
ENSG00000255474	RP11-234B24.2		12	4809583	4829268	0	0	2.55167	0	11.6678	0	15.0811	1.90207	0	0	0	5.6013	0	1.16417	0	0	0	0	2.96807
ENSG00000224848	RP11-535M15.1		9	99449338	99483403	2.69451	5.05691	2.15116	0	11.6678	0	0	1.40307	0	0	0	0	0	0.789322	0	13.6327	0	2.55178	0.98371
ENSG00000249706	RP11-89B16.1		4	54766038	54783002	0	0	0.428473	0	11.6678	0	0	2.02235	0	0	18.6822	4.23431	0	1.86338	0	0	0	0	1.98819
ENSG00000250988	AC105339.1	small Cajal body-specific RNA 15 (SCARNA15), guide RNA [Source:RefSeq DNA;Acc:NR_003011]	15	83419324	83425831	6.99969	2.05389	2.47553	0	0	0	0	1.79262	0	0	0	0	0	1.77535	18.2532	0	0	2.55178	4.84436
ENSG00000237410	AP001092.4		11	64413871	64427153	1.63641	6.74004	7.69472	0	0	0	0	0.805741	0	0	18.6822	0	0	2.32834	0	0	0	0	2.83823
ENSG00000225767	RP5-850O15.3		1	50927141	50936822	0.545472	1.41485	2.48289	0	0	0	0	2.16011	20.1155	0	0	4.23431	0	3.70131	0	0	0	2.14337	3.83336
ENSG00000245156	RP11-867G23.3		11	66037303	66045996	1.09094	5.19251	0.452924	0	0	0	30.1623	0.861275	0	0	0	0	0	0.986028	0	0	0	0	1.83736
ENSG00000255447	CTD-2210P24.6		11	45834770	45846809	0	0.887708	0	0	0	0	15.0811	0	10.0577	9.26836	0	0	0	5.26157	0	0	0	0	0
ENSG00000224870	RP4-758J18.2		1	1334902	1337426	8.5058	8.12631	2.01034	13.2216	0	0	0	0.756028	0	0	0	0	7.80543	0	0	0	0	0	0
ENSG00000247679	RP11-1277A3.1		5	177038254	177046755	3.21423	0	0	0	0	0	0	0.782291	0	0	18.6822	0	0	3.00778	0	13.6327	0	0	0.988553
ENSG00000230733	AC092171.4		7	5515435	5519442	0	1.93321	0.428473	0	0	0	0	0.842531	0	0	18.6822	0	0	4.86548	0	0	8.6253	0	4.92126
ENSG00000246025	AL355344.1		10	72370073	72428508	5.33752	2.18599	2.54761	13.2216	0	0	0	4.14428	0	0	0	0	0	1.76572	0	0	0	10.1025	0.972072
ENSG00000229688	AC004741.3		7	16250113	16310229	0.545472	4.23501	0	0	11.6678	0	0	0.326856	0	0	0	0	7.80543	1.2943	0	0	8.6253	2.90786	2.82107
ENSG00000231064	RP11-263K19.4		1	155166659	155175286	0	1.03511	1.07756	0	0	0	0	23.8494	0	0	0	0	8.43497	0	0	0	0	5.77912	0
ENSG00000236817	RP11-978I15.10		1	247728941	247804156	0	0	2.39652	13.2216	11.6678	0	0	0	0	0	0	4.23431	0	0	0	0	8.6253	0	0
ENSG00000237292	RP11-540K16.1		1	181143620	181151344	0	0.996159	0	13.2216	0	0	0	5.13356	0	0	18.6822	0	0	0	0	0	0	0	1.92782
ENSG00000229299	RP4-583P15.10		20	62376040	62377309	3.30786	1.03511	0.226462	0	0	12.0391	0	1.35649	0	0	0	4.23431	0	9.95594	0	0	0	0	7.7569
ENSG00000249001	RP11-742B18.1		4	88489187	88655108	6.60488	2.99028	1.11572	0	11.6678	0	0	0.723765	0	0	0	9.83561	0	1.10866	0	0	0	5.84559	0
ENSG00000229692	AC019171.5		2	39220117	39220998	3.30786	1.24827	2.613	13.2216	0	0	0	0.716288	0	0	0	0	0	18.6338	0	0	0	0	0
ENSG00000226484	RP11-87M18.2		X	36383741	36458375	2.14904	1.24827	1.5229	0	0	0	0	1.62016	0	18.5367	0	5.6013	0	3.95734	0	0	0	3.22735	1.85891
ENSG00000227857	RP4-533D7.5		1	46599043	46604753	0	0	0.851095	0	0	0	0	8.58162	0	0	0	0	15.6109	0	0	13.6327	0	0	0.988553
ENSG00000244769	BX255925.2		9	140118567	140122265	0	0	0	39.6647	0	0	0	0	0	0	0	0	0	0	0	0	0	0	0
ENSG00000224699	RP11-225L12.2		1	110950147	110961033	3.30786	0.937715	0.757612	0	11.6678	0	0	5.13956	0	0	0	0	7.80543	7.06833	0	0	0	0	2.96026
ENSG00000245043	AC073210.1		7	64533485	64541641	0	0.934085	6.21985	26.4431	0	0	0	1.02028	0	0	0	4.23431	0	0.789322	0	0	0	0	0
ENSG00000237070	AC005550.3		7	15707572	15721605	3.30786	0	0	13.2216	0	0	0	0	0	0	0	0	0	23.0925	0	0	0	0	0
ENSG00000253141	CTB-164N12.1		5	172890503	172911587	2.66876	0	0.226462	0	0	0	0	0.336035	0	0	0	0	0	1.16417	18.2532	13.6327	0	3.22735	0
ENSG00000228618	AC012462.3		2	216341390	216344971	0.545472	0	0	0	0	0	0	5.42442	10.0577	0	0	0	7.80543	12.4104	0	0	0	3.22735	0
ENSG00000232790	AC006481.1		7	20875050	21061771	0	1.82179	0.404962	0	0	0	0	4.3831	0	0	18.6822	0	0	2.07297	0	0	0	3.22735	8.77663
ENSG00000227218	RP11-203J24.8		9	130702574	130703231	0	4.22228	1.36727	0	0	0	0	2.62285	0	0	0	0	0	0.949559	0	27.2654	0	2.9228	0
ENSG00000215231	CTD-2247C11.3		5	5034472	5070117	5.14489	3.65852	1.71406	13.2216	0	0	0	0.780467	0	0	0	0	8.43497	2.40296	0	0	0	2.14337	1.83736
ENSG00000248630	AC132872.4		17	80172103	80175228	4.39881	2.88003	3.31088	0	11.6678	0	0	0	0	0	0	0	8.43497	3.6291	0	0	0	2.14337	2.8712
ENSG00000223930	RP11-33A14.1		3	177919838	178103205	2.66876	0	0.226462	0	0	0	0	0.480446	0	0	18.6822	0	0	0	0	0	17.2506	0	0
ENSG00000203801	NCRNA00222	non-protein coding RNA 222 [Source:HGNC Symbol;Acc:21560]	6	109072857	109091145	0.545472	2.49654	6.1562	0	11.6678	0	0	1.16119	0	0	0	5.6013	0	4.79065	0	0	0	5.84559	0.98371
ENSG00000227543	AC005726.11		17	26925808	26944393	0	2.40281	1.50243	0	0	0	0	0.317376	30.1732	0	0	0	0	4.76141	0	0	0	0	0
ENSG00000236051	RP11-226E21.3		13	77649649	77661911	3.21423	2.13012	1.82627	0	0	0	0	4.31133	0	0	0	0	0	5.34098	0	13.6327	8.6253	0	0
ENSG00000239569	RP11-325F22.4		7	104653872	104654768	3.30786	0.934085	0	0	0	0	0	1.8481	0	0	0	0	24.6754	4.67221	0	0	0	2.55178	1.01229
ENSG00000203886	CYP17A1OS	cytochrome P450, family 17, subfamily A, polypeptide 1 opposite strand [Source:HGNC Symbol;Acc:31671]	10	104592478	104594273	2.66876	0	0.329139	0	0	0	0	4.3999	10.0577	0	0	0	0	2.28033	0	0	17.2506	0	1.98819
ENSG00000250131	RP11-130F10.1		4	178366133	178598280	3.85333	0	2.27078	0	0	0	0	2.80261	10.0577	0	0	0	8.43497	6.06483	0	0	0	5.37072	0
ENSG00000240219	RP11-430C7.5		1	204595903	204598840	0	2.18236	1.30773	0	0	0	0	7.22114	0	0	0	12.7029	0	2.28033	0	0	8.6253	2.55178	1.94414
ENSG00000225437	RP1-257A15.1		6	163463589	163475193	2.29971	0	0.885393	13.2216	0	0	0	2.23424	0	9.27833	0	0	7.80543	3.07804	0	0	0	0	0
ENSG00000224911	AC015936.3		17	42980529	42981914	8.54997	0	0.660951	0	0	0	0	0.834689	0	0	0	0	0	6.49286	18.2532	0	0	2.14337	1.85891
ENSG00000224078	AC124303.3	small nucleolar RNA, C/D box 115-13 (SNORD115-13), small nucleolar RNA [Source:RefSeq DNA;Acc:NR_003305]	15	25224704	25620623	5.15932	4.08457	0.750259	0	0	0	0	2.62783	0	0	0	0	7.80543	1.67614	0	0	8.6253	8.04785	0
ENSG00000248734	CTD-2260A17.1		5	96120481	96121703	3.91771	1.80485	2.14755	0	11.6678	0	0	2.26595	0	0	0	4.23431	0	4.07616	0	0	8.6253	0	0
ENSG00000253199	RP11-421P23.1		8	20831308	20852630	0	27.5922	0	0	0	0	0	0	10.0577	0	0	0	0	0	0	0	0	0	0.988553
ENSG00000255980	AP000439.1		11	69240458	69244389	0.545472	3.48771	0.768144	0	0	0	15.0811	0	0	0	0	0	0	2.90236	0	13.6327	0	2.20226	0
ENSG00000234455	AC067960.1		2	121839013	121846302	0	1.41409	0.776351	13.2216	0	0	0	1.62595	0	0	0	0	15.6109	3.69168	0	0	0	2.20226	0
ENSG00000241111	RP11-129B22.1		3	64053640	64088807	0.545472	2.80952	5.89672	0	11.6678	0	0	2.55753	0	0	0	0	0	4.74852	0	0	0	5.47457	4.79401
ENSG00000254823	RP11-109E10.1		11	123184382	123185478	12.1827	1.11618	0.932785	0	0	0	0	0.497911	0	0	18.6822	0	0	5.05838	0	0	0	0	0
ENSG00000174403	C20orf200	chromosome 20 open reading frame 200 [Source:HGNC Symbol;Acc:26393]	20	61141550	61148733	2.29971	0	5.01724	0	0	0	0	2.34683	0	0	0	5.6013	0	9.59888	0	0	0	6.83852	6.70721
ENSG00000236924	RP11-390F4.6		9	6645956	6670635	0.545472	0.937051	18.86	0	0	0	0	0.6753	0	0	0	0	7.80543	0.949559	0	0	8.6253	0	0
ENSG00000242125	SNHG3	small nucleolar RNA host gene 3 (non-protein coding) [Source:HGNC Symbol;Acc:10118]	1	28832492	28837404	0	6.45646	0.966766	0	0	0	15.0811	0.31496	0	0	0	0	0	1.86338	0	13.6327	0	0	0
ENSG00000249534	RP11-83C7.2		4	38422283	38524801	5.33752	0	0	0	0	12.0391	0	0.980319	0	0	0	5.6013	0	3.51162	0	0	8.6253	2.20226	0
ENSG00000226143	RP1-138B7.5		20	42178029	42179589	1.63641	1.41485	2.69845	0	0	0	0	3.01392	0	0	0	0	7.80543	1.89798	0	0	8.6253	9.33798	1.83736
ENSG00000230173	AC006196.1		2	195595319	195626159	0.545472	5.13926	1.85339	0	0	0	0	0.880834	10.0577	0	18.6822	0	0	0	0	0	0	0	1.01229
ENSG00000254453	RP11-2C23.2		11	20065392	20070849	0	0	0.411165	0	0	36.1172	0	0	0	0	0	0	0	1.57864	0	0	0	0	0
ENSG00000236017	ASMTL-AS1	ASMTL antisense RNA 1 (non-protein coding) [Source:HGNC Symbol;Acc:25811]	X	1520662	1534319	0	2.05026	0.450786	0	11.6678	0	0	3.38076	0	0	0	0	0	0	0	13.6327	0	0	6.88954
ENSG00000232693	AC012370.2		2	65600834	65607819	7.15769	0	1.26829	0	0	0	0	7.12903	10.0577	0	0	0	0	12.4373	0	0	0	0	0
ENSG00000237222	AC090505.6		3	194429150	194502897	5.36327	0	2.26152	0	0	0	0	6.56941	0	0	0	5.6013	0	5.21721	0	0	8.6253	4.28675	0
ENSG00000203288	RP11-98D18.9		1	151763280	151766878	0.545472	1.87114	1.53655	0	0	0	0	0.726729	10.0577	0	0	0	0	3.04793	18.2532	0	0	0	1.85891
ENSG00000253737	KB-1460A1.3		8	102151893	102153157	8.52023	0.937051	1.0103	0	11.6678	0	0	1.79528	0	0	0	0	7.80543	0.949559	0	0	0	3.22735	1.97711
ENSG00000227824	AC122136.2		2	216734646	216735241	0	0	0	0	0	0	0	0	0	0	0	0	0	37.8869	0	0	0	0	0
ENSG00000248595	AC104117.1		5	178365678	178368084	2.31414	0	0	13.2216	0	0	15.0811	0.776372	0	0	0	0	0	0.949559	0	0	0	2.55178	2.96807
ENSG00000205837	AC079923.1		2	6868309	6910442	0.545472	1.27533	0	0	0	0	0	9.3822	0	0	18.6822	5.6013	0	1.2943	0	0	0	0	0.98371
ENSG00000255406	RP11-713P17.5		11	133896882	133898013	0	0	0.434489	13.2216	0	0	0	0	10.0577	0	0	5.6013	0	2.32834	0	0	0	5.10355	1.01229
ENSG00000236914	AC087473.1		15	38363831	38364884	0	0	3.03601	0	0	0	0	6.02114	0	0	0	4.23431	0	4.60288	0	13.6327	0	6.1352	0
ENSG00000237021	RP3-486I3.7		6	116575370	116576437	2.14904	0	0.822331	0	0	0	0	0.789023	20.1155	9.26836	0	0	0	1.16417	0	0	0	3.22735	0
ENSG00000236366	RP11-440G9.1		6	142847592	142959026	2.31414	0	3.18426	0	0	12.0391	0	2.31208	0	0	0	5.6013	0	2.40296	0	0	8.6253	0	1.01229
ENSG00000234676	RP11-337A23.3		9	26955778	26956293	0.545472	5.16734	4.0248	0	0	0	0	1.03633	0	0	0	5.6013	0	5.74288	0	0	0	6.43012	8.92369
ENSG00000227260	AC116035.1		3	30566237	30568677	0	1.24827	1.82988	13.2216	0	0	0	0.6753	0	0	0	0	0	6.70455	0	0	8.6253	3.22735	1.92782
ENSG00000255041	RP11-430H10.4		11	45408766	45535352	0	2.34818	0.434489	0	11.6678	0	0	0	0	0	0	4.23431	0	1.9528	0	0	8.6253	2.14337	5.83664
ENSG00000251326	RP11-521E5.1		4	131297384	131307526	1.63641	1.03511	0.853862	0	0	12.0391	0	0.301018	0	0	0	0	7.80543	3.9562	0	0	8.6253	0	0.98371
ENSG00000228613	AC144450.1		2	1550437	1623885	0	2.51433	1.86742	0	11.6678	0	0	2.6697	10.0577	0	0	0	8.43497	0	0	0	0	0	0
ENSG00000224008	RP5-1010E17.2		20	54036874	54043735	3.39065	0	0	0	0	0	0	3.38663	0	0	0	12.7029	0	0.964311	0	13.6327	0	2.14337	0.988553
ENSG00000227039	AL844908.5		21	46340966	46349593	2.18189	1.77542	3.68787	0	0	0	0	1.58499	0	0	0	0	0	4.87002	18.2532	0	0	0	4.77494
ENSG00000236036	RP11-270C18.2		13	36271661	36273393	0	8.12676	0.442697	13.2216	0	0	0	4.6277	0	0	0	0	0	8.55003	0	0	0	2.14337	0
ENSG00000251307	RP11-506H20.1		5	54529762	54591029	0.545472	0	1.27638	0	0	0	0	5.80838	10.0577	0	0	0	0	0	0	0	17.2506	2.14337	0
ENSG00000229876	RP11-199O14.1		20	6427370	6509106	13.3895	1.2277	2.06122	0	0	0	0	1.62015	0	0	0	0	8.43497	10.2982	0	0	0	0	0
ENSG00000233461	RP11-295G20.2		1	231658134	231664302	1.09094	0.937715	1.49149	0	0	0	0	1.42581	0	0	0	4.23431	0	0	18.2532	0	8.6253	0	0.972072
ENSG00000256321	RP11-153K16.1		12	23252302	23344521	3.30786	3.58843	0.226462	0	0	0	0	6.84554	10.0577	0	0	0	7.80543	4.10369	0	0	0	0	0.972072
ENSG00000230153	AF003626.1		X	150084286	150089411	2.31414	2.17775	0.411165	0	0	0	0	1.15521	0	0	0	4.23431	7.80543	1.10866	0	0	0	2.9228	14.7294
ENSG00000256790	RP11-429A20.3		12	5127631	5130879	0	1.93753	2.86964	0	0	0	0	0.386784	0	0	0	0	8.43497	4.95698	18.2532	0	0	0	0
ENSG00000249601	CTB-27N1.1		5	169618583	169626145	2.66876	0	28.9364	0	0	0	0	1.01817	0	0	0	0	0	0.986028	0	0	0	3.22735	0
ENSG00000247081	RP11-318M2.2		8	104169218	104311000	0	0	0	0	0	0	0	0.301018	0	0	0	0	0	0	36.5063	0	0	0	0
ENSG00000225792	AC004540.4		7	26411764	26416321	3.85333	2.16475	0.859302	0	0	0	0	1.69138	0	0	18.6822	4.23431	0	2.08506	0	0	0	2.20226	1.00087
ENSG00000224794	RP3-333H23.8		22	39688993	39691568	1.76867	0	1.66132	0	0	0	0	5.37012	0	9.27833	18.6822	0	0	0	0	0	0	0	0
ENSG00000232939	RP11-406O23.2		9	112522640	112534323	1.76867	0	4.43426	0	0	0	15.0811	1.34142	10.0577	0	0	0	0	3.06965	0	0	0	0	0.988553
ENSG00000232947	RP11-401E14.2		6	15995175	16000028	2.69451	0	0.434489	0	0	0	0	0	0	0	18.6822	0	0	6.28192	0	0	8.6253	0	0
ENSG00000230057	RP11-385E5.7		13	19978749	19979239	2.14904	0	0.862962	0	0	0	0	3.07731	10.0577	0	0	15.4369	0	3.19372	0	0	0	0	1.92782
ENSG00000235123	AF042090.2		21	41755010	41757285	3.93612	0	0.555601	0	0	0	0	3.73891	0	0	0	12.7029	0	0.949559	0	0	8.6253	3.22735	2.949
ENSG00000231724	RP11-573D15.3		3	186525481	186535910	0.545472	5.81817	5.44868	13.2216	0	0	0	0	0	0	0	0	0	4.36344	0	0	0	4.28675	2.9719
ENSG00000231312	AC007246.3		2	39663778	39892483	0	1.11618	4.71847	0	0	0	0	5.71357	0	0	0	4.23431	0	7.2457	0	0	8.6253	0	4.88571
ENSG00000254734	CTD-3138F19.1		11	29735456	29903261	27.3702	0	0.599131	0	0	0	0	0.268018	0	0	0	0	0	5.37048	0	0	0	2.90786	0
ENSG00000250855	RP11-269F21.1		4	112723957	112761042	3.39065	1.11618	1.95138	0	23.3356	0	0	1.87076	0	0	0	0	0	3.00778	0	0	0	0	1.83736
ENSG00000223627	RP1-54A3.1		6	161236582	161238383	6.61931	0.902423	0.329139	0	0	0	0	0.833071	0	0	0	0	0	8.56276	18.2532	0	0	0	0.98371
ENSG00000230728	RP11-240D10.4		1	55087150	55094111	0	2.13598	0.885393	0	0	0	0	4.43651	0	9.27833	0	0	0	7.19334	0	0	8.6253	0	3.88845
ENSG00000232034	AC092168.2		2	101439123	101463682	5.15932	3.24059	1.17479	0	0	0	0	2.41544	0	0	0	0	0	8.70225	0	0	0	10.8935	4.75778
ENSG00000256017	AC006262.2		19	46692287	46706319	9.21661	1.03511	7.3248	0	0	0	0	4.00083	0	0	0	0	0	5.04501	0	0	0	2.9228	6.77094
ENSG00000234155	RP11-30P6.6		6	86096937	86099904	2.29971	1.79013	1.52781	0	11.6678	0	15.0811	1.22573	0	0	0	0	0	2.70319	0	0	0	0	0
ENSG00000234174	AC016683.5		2	113929112	113932937	5.55412	3.86412	0.329139	0	0	0	0	1.12617	0	0	0	0	0	2.07297	0	0	0	0	23.3454
ENSG00000256422	RP11-886D15.1		11	104316596	104480049	9.92359	0.937715	1.22262	0	0	0	0	3.79184	0	9.27833	0	0	0	3.638	0	0	0	5.45963	2.00084
ENSG00000249898	CTD-2541M15.1		8	6475996	6565730	0	0	0.329139	0	0	0	0	0	0	0	18.6822	0	0	2.82769	0	0	8.6253	5.77912	0
ENSG00000253708	RP11-51J9.4		8	30034070	30038404	0	0.887708	0	0	0	24.0781	0	0	0	0	0	11.2026	0	0	0	0	0	0	0
ENSG00000251324	RP11-79P5.5		5	72750012	72768721	14.4114	1.03511	0.411165	0	0	0	0	1.75867	0	0	0	0	0	1.2943	0	0	17.2506	0	0
ENSG00000225666	AC005534.9		7	156461646	156469257	1.76867	0	0.416605	0	0	12.0391	0	1.73733	0	0	0	0	7.80543	3.72675	0	0	0	8.59807	0
ENSG00000237737	AC005041.9		2	74612613	74621009	0	1.2277	0	0	0	0	0	33.7282	0	0	0	0	0	1.10866	0	0	0	0	0
ENSG00000227388	RP11-112J3.16		9	35786643	35790429	4.39881	0	0	0	0	0	0	3.09191	10.0577	0	0	0	0	4.83364	0	13.6327	0	0	0
ENSG00000253944	RP11-156K13.1		8	17658854	17718578	0	0	0	0	0	12.0391	15.0811	3.17459	0	0	0	5.6013	0	0	0	0	0	0	0
ENSG00000250854	CTD-2188H20.1		5	52965911	52968075	2.69451	2.28338	13.5348	0	0	0	0	1.84256	10.0577	0	0	0	0	0	0	0	0	2.55178	2.92526
ENSG00000230539	AC087069.1		7	36637440	36639726	0	0	1.17479	13.2216	0	12.0391	0	0.775851	0	0	0	0	0	0	0	0	0	5.81571	2.83098
ENSG00000228106	RP11-452F19.3		1	222988364	223010726	0	0	7.29411	0	0	0	15.0811	3.45624	0	0	0	0	0	0	0	0	0	4.34563	5.67844
ENSG00000221817	RP11-137L10.6		10	75255283	75264940	0.545472	1.11618	0.411165	0	0	0	0	6.19153	0	0	18.6822	5.6013	0	2.28033	0	0	0	0	1.01229
ENSG00000246328	AC020926.1		16	20685853	20693496	1.76867	3.20557	1.37097	0	11.6678	0	0	5.47274	0	0	0	0	0	2.56467	0	0	0	6.83852	2.92526
ENSG00000225855	RUSC1-AS1	RUSC1 antisense RNA 1 (non-protein coding) [Source:HGNC Symbol;Acc:26680]	1	155286654	155293967	2.18189	0.902423	3.38337	0	0	0	0	1.57587	0	0	18.6822	0	0	6.85388	0	0	0	2.14337	0
ENSG00000225303	RP11-512N4.2		10	52232574	52234006	11.4629	0	2.1933	0	0	0	0	0.317376	0	0	0	0	0	2.90305	0	13.6327	0	3.22735	1.92782
ENSG00000225472	RP11-120J1.1		9	14317084	14357907	0.545472	0	1.10906	0	0	12.0391	0	0.631383	0	0	0	0	0	3.06965	0	0	17.2506	0	1.01229
ENSG00000237400	AC006960.7		7	36502632	36544121	4.62827	2.70727	0.821567	0	0	0	0	1.81714	10.0577	0	0	0	0	4.75418	0	0	0	5.05123	5.75899
ENSG00000235455	RP11-314A5.5		3	51907612	51909783	0	2.07021	4.35543	26.4431	0	0	0	1.72475	0	0	0	0	0	0.949559	0	0	0	0	0
ENSG00000237081	RP11-302M6.2		1	90421225	90422281	5.48975	0	0	0	0	0	0	0.386784	0	0	0	0	0	7.94346	0	13.6327	0	6.1352	1.93671
ENSG00000224424	RP11-316M24.1		3	48885005	48889414	2.29971	0	0	0	11.6678	0	0	1.73821	10.0577	0	0	0	0	6.81293	0	0	0	0	2.9327
ENSG00000223941	RP11-33A14.2		3	178136989	178175097	0	0	0.889255	13.2216	0	0	0	1.10344	0	0	0	0	0	0.986028	18.2532	0	0	0	1.00087
ENSG00000225439	AC073263.4		2	74375136	74377188	7.06756	2.13598	4.66353	0	11.6678	0	0	1.10198	0	0	0	0	0	1.16417	0	0	0	7.61795	0
ENSG00000230991	AC092625.1		2	155822025	155824515	0	1.41409	0	0	0	0	0	1.5706	0	0	0	0	0	0	0	0	0	2.14337	30.2892
ENSG00000224822	AC112217.2		3	24496627	24500925	0.545472	1.27533	5.23987	0	0	0	0	1.3403	20.1155	0	0	5.6013	0	1.2943	0	0	0	0	0
ENSG00000246634	AC068152.2		17	45132467	45177627	0	0	0.329139	13.2216	0	0	0	1.61626	0	0	0	0	7.80543	5.02841	0	0	0	5.45963	1.94414
ENSG00000255506	RP11-203F8.1		11	92481898	92500033	6.52209	0	1.08942	0	0	0	0	1.61243	0	0	0	4.23431	7.80543	0	0	0	8.6253	2.55178	2.85978
ENSG00000232445	RP11-132A1.4		7	100951627	100954266	0	0.937715	25.779	0	0	0	0	0.776372	0	0	0	0	7.80543	0	0	0	0	0	0
ENSG00000214888	XXyac-YM21GA2.7		9	90471930	90474314	0	18.606	1.66799	0	0	0	0	0.520463	0	0	0	0	0	1.92862	0	0	0	10.5781	1.996
ENSG00000230124	RP5-1180C10.2		1	180238788	180243887	3.78546	0.996159	1.68022	0	0	0	0	0.677896	0	0	0	0	8.43497	1.86338	0	0	0	2.14337	15.6747
ENSG00000254813	RP11-252C15.1		8	12623358	12668987	0.545472	1.41485	11.3327	0	0	0	0	0.455747	10.0577	0	0	4.23431	0	4.02433	0	0	0	2.20226	0.98371
ENSG00000249695	RP11-598F7.4		12	246577	258335	0	6.6243	5.68477	0	0	0	0	0.86201	0	0	0	9.83561	0	0	0	0	8.6253	2.55178	1.00087
ENSG00000237667	AC113607.1		2	779837	864112	0	3.29791	4.83513	0	11.6678	0	15.0811	0.291113	0	0	0	0	0	0	0	0	0	0	0
ENSG00000253214	RP11-1149M10.2		8	82066514	82076834	2.14904	1.24827	0.333654	0	0	0	0	5.02204	10.0577	0	0	5.6013	0	3.15767	0	0	0	7.60301	0
ENSG00000247694	AL136040.2		14	81687562	81688799	0	0	0.404962	0	0	0	0	0.301018	30.1732	0	0	0	0	0	0	0	0	4.28675	0
ENSG00000236094	RP11-252M21.1		13	31456688	31457532	2.29971	2.49654	27.7154	0	0	0	0	0.469706	0	0	0	0	0	0	0	0	0	2.14337	0
ENSG00000213468	RP11-453F18__B.1		X	130836678	130964671	0.545472	2.44995	0.452924	0	0	0	0	5.06476	0	0	0	0	0	2.25861	18.2532	0	0	2.20226	3.86194
ENSG00000228280	RP11-367B6.2		10	77502498	77503513	5.69036	2.3915	1.07154	0	0	0	0	1.56766	0	9.27833	0	0	0	0	0	0	8.6253	4.40451	1.996
ENSG00000254307	KB-1608C10.2		8	95803871	95806064	1.76867	2.53027	0.450786	0	0	12.0391	15.0811	2.32306	0	0	0	0	0	0.789322	0	0	0	0	0
ENSG00000224930	NCRNA00162	non-protein coding RNA 162 [Source:HGNC Symbol;Acc:19725]	21	46419122	46424642	1.76867	3.85989	1.06591	0	0	0	0	2.16154	10.0577	0	0	4.23431	0	3.19342	0	0	8.6253	0	0
ENSG00000234715	CTB-107G13.1		7	103085654	103154454	2.29971	2.56196	0.965078	0	0	0	0	1.77285	0	0	0	0	0	4.09091	0	0	17.2506	2.14337	3.84349
ENSG00000240178	RP11-449M18.2		X	15801328	15802658	0	0	3.14544	13.2216	0	0	0	2.465	10.0577	0	0	4.23431	0	1.75363	0	0	0	0	0
ENSG00000218018	RP4-800J21.3		20	55959216	55968118	21.2505	0	0.450786	0	0	0	0	0.386784	0	0	0	0	0	6.56474	0	0	0	4.28675	1.92782
ENSG00000255553	RP11-810P12.5		11	61844749	61849656	0	0	0	0	0	0	0	0.472486	0	0	0	0	0	34.2824	0	0	0	0	0
ENSG00000226101	AC007461.2		17	70068474	70089622	9.25522	0	1.00281	0	0	0	0	0.99089	0	18.5567	0	0	0	2.70319	0	0	0	2.20226	0
ENSG00000254951	RP11-494M8.4		11	7726175	7927502	2.66876	0	6.74402	0	0	0	0	0.469706	10.0577	0	0	4.23431	0	2.84754	0	0	0	0	7.60104
ENSG00000248837	RP11-412P11.1		4	22999174	23058485	8.13675	0	0.329139	0	0	0	0	0.508353	10.0577	0	0	9.83561	0	1.89912	0	0	0	0	3.79562
ENSG00000236332	AP001605.4		21	28733483	28768106	3.21423	5.64696	3.31631	0	0	0	0	2.88935	10.0577	0	0	0	0	7.54047	0	0	0	0	1.85891
ENSG00000227217	RP11-367J7.3		1	157661552	157666249	0	0	0.404962	0	0	0	0	0	0	9.26836	0	5.6013	7.80543	1.67614	0	0	0	0	9.76253
ENSG00000256824	RP11-21A7A.2		11	63803442	63871125	9.28448	0	0.879259	0	0	0	0	0	0	0	18.6822	0	0	5.61614	0	0	0	0	0
ENSG00000229236	TTTY10	testis-specific transcript, Y-linked 10 (non-protein coding) [Source:HGNC Symbol;Acc:18491]	Y	22627554	22681114	0	3.10075	0.87117	0	11.6678	0	0	0.301018	10.0577	0	0	0	8.43497	0	0	0	0	0	0
ENSG00000246650	AL732366.1		X	20005041	20009038	0	2.49654	1.03639	0	0	0	0	0.363365	0	0	0	0	0	9.31689	18.2532	0	0	2.90786	0
ENSG00000228735	GS1-18A18.2		7	54643745	54646487	0	0.937051	1.86667	0	11.6678	12.0391	0	1.36103	0	0	0	0	0	4.34002	0	0	0	2.14337	0
ENSG00000248788	AL162853.2		13	23429412	23490508	2.14904	0.887708	0.404962	0	11.6678	0	0	0.631383	0	0	0	0	0	4.0571	0	0	8.6253	5.84559	0
ENSG00000240498	CDKN2B-AS1	CDKN2B antisense RNA 1 (non-protein coding) [Source:HGNC Symbol;Acc:34341]	9	21994790	22121096	7.13194	0	4.7945	0	0	0	0	9.68703	0	0	0	0	0	2.91465	0	0	8.6253	0	0.988553
ENSG00000254043	RP11-3N13.2		8	75803386	75808537	5.90874	0.902423	5.59781	0	0	0	0	0.781877	0	0	0	0	8.43497	0.9764	0	0	8.6253	2.90786	0
ENSG00000236341	RP5-1103B4.3		1	57429559	57462430	2.29971	0.934085	0.877186	0	11.6678	0	15.0811	1.1175	0	0	0	0	0	2.07297	0	0	0	0	0
ENSG00000227987	AC092675.4		2	98963458	98967603	4.8764	3.21969	6.00493	13.2216	0	0	0	1.72522	0	0	0	0	0	4.95914	0	0	0	0	0
ENSG00000229793	RP11-190J1.7		10	103570752	103571371	6.84519	1.11618	0.434489	0	11.6678	0	0	0.268018	0	0	0	5.6013	0	3.90068	0	0	0	2.20226	1.94414
ENSG00000254876	RP11-23J9.5	SUGT1-1300002K09Rik pseudogene (LOC100499484), non-coding RNA [Source:RefSeq DNA;Acc:NR_036526]	9	100000731	100059596	6.71294	0	1.95351	0	0	12.0391	0	0.980839	0	0	0	4.23431	0	1.10866	0	0	0	2.14337	4.80301
ENSG00000225579	RP11-318G21.3		13	78402357	78408085	0	3.53165	0.411165	0	0	12.0391	0	0.291113	0	0	0	5.6013	0	1.86338	0	0	0	10.2202	0
ENSG00000225746	AL132709.5		14	101415315	101426510	0	0.934085	0.450786	0	0	0	0	0.363365	0	0	18.6822	0	0	11.2436	0	0	0	2.20226	0
ENSG00000205628	GS1-179L18.1		7	53723202	53879624	2.14904	0	0.862962	0	11.6678	0	0	2.86248	0	0	0	8.46862	0	3.94844	0	0	0	2.90786	1.00087
ENSG00000254286	RP11-89K10.1		8	127570120	127725660	4.49602	0.996159	3.68683	0	0	0	0	0.806962	10.0577	0	0	0	8.43497	3.43487	0	0	0	0	1.94414
ENSG00000231980	AC011899.10		7	157820065	157823820	6.42846	0	0.654935	13.2216	0	0	0	1.5847	0	0	0	5.6013	0	1.2943	0	0	0	2.14337	2.92785
ENSG00000244586	RP11-875H7.4		3	55521727	55522336	0	10.0944	2.3867	13.2216	0	0	0	0.363365	0	0	0	0	0	0	0	0	0	0	7.78869
ENSG00000254275	RP11-234A3.1		8	129417515	129440162	0.545472	0	0	0	11.6678	0	0	2.32269	0	0	0	5.6013	0	4.65669	0	0	0	8.04785	1.00087
ENSG00000249610	CTC-441N14.1		5	121490191	121491710	2.29971	0.937051	0	0	0	0	0	16.7195	0	0	0	4.23431	0	0.964311	0	0	8.6253	0	0
ENSG00000245146	CTB-131B5.4		5	139452442	139488215	0.545472	4.01985	1.18023	0	0	0	0	1.16469	10.0577	0	0	4.23431	7.80543	1.86338	0	0	0	2.90786	0
ENSG00000223392	CLDN10-AS1	CLDN10 antisense RNA 1 (non-protein coding) [Source:HGNC Symbol;Acc:39907]	13	96131698	96186164	0	2.4492	0.434489	0	0	0	0	5.92831	10.0577	9.26836	0	0	0	3.00778	0	0	0	2.55178	0
ENSG00000241369	RP11-10O22.2		3	162845711	163079351	2.84518	0.887708	1.28558	0	0	0	0	1.54629	0	0	0	0	0	0	18.2532	0	0	2.9228	5.92556
ENSG00000246515	AC092636.1		2	97584843	97591573	1.09094	1.83651	0	0	0	0	0	1.23933	0	0	18.6822	0	0	0.789322	0	0	0	2.14337	7.79579
ENSG00000248596	RP11-844P9.2	centrosomal protein 192kDa pseudogene (LOC643201), non-coding RNA [Source:RefSeq DNA;Acc:NR_036494]	5	175570088	175626298	4.39881	2.16178	0	0	0	0	0	0.952931	0	0	0	0	7.80543	0	18.2532	0	0	0	0
ENSG00000256694	RP11-598F7.5		12	273830	275487	1.76867	4.08055	2.2045	0	0	0	0	1.73509	0	0	0	5.6013	0	3.85078	0	0	0	7.60301	6.70455
ENSG00000223479	RP11-275A6.1		1	74100899	74175264	3.21423	0	0.404962	0	0	0	0	1.35019	10.0577	0	0	0	0	0	0	13.6327	0	0	4.87429
ENSG00000233919	RP11-372H2.1		3	41203778	41210038	0.545472	0	0.226462	13.2216	0	0	0	1.28101	0	0	0	0	0	0	18.2532	0	0	0	0
ENSG00000251497	RP11-197N18.7		12	123565931	123569291	0.545472	3.33986	1.28636	13.2216	0	0	0	1.85329	0	0	0	5.6013	0	0	0	0	0	5.77912	1.83736
ENSG00000231407	RP11-576I22.2		1	170429594	170501788	3.7597	1.27533	0.450786	0	0	24.0781	0	0.654802	0	0	0	0	0	3.23714	0	0	0	0	0
ENSG00000250303	RP11-356J5.12		11	112141472	112233257	3.27283	3.66127	0.442697	0	0	0	0	1.74452	0	18.5367	0	0	0	0.986028	0	0	0	2.90786	1.85891
ENSG00000224514	AC093611.1		3	13692196	13788132	0	2.69018	0	0	11.6678	0	15.0811	1.10435	0	0	0	0	0	1.86338	0	0	0	0	1.00087
ENSG00000231883	RP1-297M16.2		6	151517816	151518773	0	1.27533	3.19518	0	11.6678	12.0391	0	0	0	0	0	4.23431	0	0.986028	0	0	0	0	0
ENSG00000214796	RP11-480I12.5		1	202820956	202830748	3.30786	3.63556	12.2372	0	0	0	0	0.746878	0	0	0	0	7.80543	1.2943	0	0	0	4.34563	0
ENSG00000250269	RP11-395P13.5		5	124718552	124719148	0	2.34387	5.81119	0	0	0	0	1.74456	0	0	0	5.6013	0	0	0	0	8.6253	6.1352	2.96026
ENSG00000249234	RP11-452J21.2		4	16180562	16184743	1.63641	7.82634	8.29428	0	11.6678	0	0	0.618394	0	0	0	0	0	0.964311	0	0	0	2.20226	0
ENSG00000249359	RP11-374A4.1		5	21323945	21341484	0	0	0	0	0	0	0	0	0	0	0	0	31.2217	0	0	0	0	0	1.94414
ENSG00000233978	AC016735.3		2	43268332	43270921	0	3.29028	1.72314	13.2216	0	0	0	1.81968	0	0	0	0	0	0	0	0	8.6253	2.55178	1.92782
ENSG00000244578	RP11-548O1.3		3	138654031	138662862	2.14904	1.11618	1.66132	0	0	0	0	0.559131	20.1155	0	0	0	0	0.789322	0	0	0	0	6.74489
ENSG00000246170	AL122007.1		1	118406111	118411617	0	0	0.932785	0	0	0	0	0	30.1732	0	0	0	0	0	0	0	0	0	1.92782
ENSG00000236819	AC087393.1		17	20978869	20993928	0	0	0.78444	0	0	12.0391	0	0	0	0	0	0	0	1.93559	18.2532	0	0	0	0
ENSG00000253417	RP11-109J4.1		5	160358785	160365633	0	0.887708	1.27413	0	0	0	0	0	0	0	0	0	0	2.40296	18.2532	0	0	4.34563	5.79849
ENSG00000234653	AC079117.1		2	77213091	77236917	4.44875	0	0	13.2216	0	0	0	1.47525	0	0	0	4.23431	0	0.949559	0	0	8.6253	0	0
ENSG00000186056	RP5-1166H10.2		1	31190940	31199674	2.31414	2.22072	0	0	0	0	0	3.33247	0	0	0	0	0	2.88515	18.2532	0	0	2.90786	1.01229
ENSG00000236213	AC006369.2		2	37827279	37873841	10.8344	4.61223	1.09544	0	0	0	0	0	0	0	0	0	0	8.30686	0	0	0	2.20226	5.77492
ENSG00000245923	AC108134.4		16	3178837	3182043	0	0	32.8252	0	0	0	0	0	0	0	0	0	0	0	0	0	0	0	0
ENSG00000223959	AFG3L1P	AFG3 ATPase family gene 3-like 1 (S. cerevisiae), pseudogene [Source:HGNC Symbol;Acc:314]	16	90038994	90068569	2.66876	2.17775	0	0	0	0	0	0.843811	0	0	18.6822	0	0	4.5785	0	0	0	0	3.87197
ENSG00000224959	AC017002.2		2	112249520	112252388	0	1.11618	0.763628	0	0	0	0	0	10.0577	18.5567	0	0	0	2.32834	0	0	0	0	0
ENSG00000233400	AC007130.1		7	27655593	27667109	2.85961	5.65141	1.93326	0	0	0	0	3.98207	0	9.26836	0	0	0	0	0	0	0	7.24693	1.85891
ENSG00000243040	RBMY2FP	RNA binding motif protein, Y-linked, family 2, member F pseudogene [Source:HGNC Symbol;Acc:23891]	Y	24455006	24462352	7.13194	3.14713	1.56639	0	11.6678	0	0	2.32932	0	0	0	0	0	2.07297	0	0	0	2.90786	1.97711
ENSG00000215908	CROCCP2	ciliary rootlet coiled-coil, rootletin pseudogene 2 [Source:HGNC Symbol;Acc:28170]	1	16944751	16971178	0	0	2.47783	0	0	0	0	1.78106	0	0	0	4.23431	0	3.437	18.2532	0	0	2.55178	0
ENSG00000228172	RP1-317E23.3		1	26143240	26146263	0.545472	4.43854	1.28613	0	11.6678	0	0	2.46121	0	0	0	0	0	0	0	0	0	10.4743	1.85891
ENSG00000238265	NCRNA00317	non-protein coding RNA 317 [Source:HGNC Symbol;Acc:23126]	21	23095613	23109639	0	0	0	0	11.6678	0	0	10.3977	0	0	0	0	8.43497	0	0	0	0	2.20226	0
ENSG00000255471	RP11-736K20.5		11	86603256	86636079	0	0	2.26599	0	0	0	0	0.268018	0	9.27833	18.6822	0	0	0	0	0	0	2.20226	0
ENSG00000251011	RP11-402L6.1		3	132964950	132976032	0	1.11618	2.37196	0	0	0	15.0811	9.89311	0	0	0	4.23431	0	0	0	0	0	0	0
ENSG00000251323	RP11-452H21.4		11	78135028	78140882	9.22769	0.937715	1.70862	0	0	0	0	2.53012	0	0	0	4.23431	0	9.06507	0	0	0	0	4.97758
ENSG00000249307	RP11-438E5.1		4	79892902	80229952	1.76867	0	0	0	0	0	0	0	0	0	0	0	25.3049	1.2943	0	0	0	4.28675	0
ENSG00000251049	RP11-685F15.1		4	58462106	58472038	0.545472	1.41485	3.97125	0	0	0	15.0811	2.66044	0	0	0	0	0	0	0	0	0	2.90786	5.97935
ENSG00000251518	CTD-2130F23.2		5	37948593	37951157	0	0	0.599131	0	0	0	0	15.6928	10.0577	0	0	0	0	6.21046	0	0	0	0	0
ENSG00000255197	RP11-750H9.5		11	47404699	47430741	0	2.55066	0	0	0	0	0	0	0	0	0	0	0	0	0	0	0	0	29.9999
ENSG00000212978	AC016747.3		2	61368732	61372104	2.29971	0	2.23143	0	11.6678	0	0	4.29937	0	0	0	5.6013	0	4.1942	0	0	0	2.20226	0
ENSG00000223478	RP11-545E17.3		9	131486724	131495473	0	0	3.47547	0	0	0	0	3.83779	0	0	0	0	23.4163	1.67614	0	0	0	0	0
ENSG00000253640	CTD-2281E23.1		8	1244292	1250829	1.09094	0.937715	9.63553	13.2216	0	0	0	1.08977	0	0	0	0	0	3.61685	0	0	0	0	2.80943
ENSG00000223701	RP11-244K5.1		6	150211239	150240644	1.76867	0.902423	0	0	0	0	0	9.59749	20.1155	0	0	0	0	0	0	0	0	0	0
ENSG00000235236	RP13-131K19.1		3	49017351	49021418	5.33752	0	0.416605	0	0	0	0	1.19165	0	9.26836	0	8.46862	0	6.62874	0	0	0	0	1.01229
ENSG00000253695	RP11-177H2.2		8	10698086	10704011	9.30673	2.45539	1.39505	13.2216	0	0	0	0.469706	0	0	0	0	0	4.4209	0	0	0	0	1.00087
ENSG00000225860	RP11-1018N14.2		17	49414076	49419932	0.545472	0	0.411165	26.4431	0	0	0	0.6753	0	0	0	0	0	4.19172	0	0	0	0	0
ENSG00000253505	CTA-398F10.1		8	8272200	8282142	10.6841	0	0	0	0	0	0	1.29327	0	0	0	14.0699	0	2.25861	0	0	0	2.90786	1.01229
ENSG00000255165	CTD-2609K8.3		11	44093012	44093953	2.14904	0.887708	0.631424	0	0	0	0	0.464916	0	0	0	0	7.80543	0	18.2532	0	0	0	2.02458
ENSG00000223742	RP11-149B9.2		X	28589649	28604512	0	0	1.0109	0	11.6678	0	0	0	10.0577	0	0	0	0	0.789322	0	0	8.6253	0	0
ENSG00000225527	RP11-383B4.4		10	18820778	18822265	0	0	0.637627	0	0	0	0	0.773568	0	0	0	0	0	9.34706	18.2532	0	0	2.14337	0.988553
ENSG00000231249	AC024168.2		3	4532575	4534847	0	0	0	0	0	0	0	0	0	0	0	31.0072	0	0.986028	0	0	0	0	0
ENSG00000253490	AC145110.1		8	29605825	29656008	0	0.887708	1.45608	0	0	0	0	0.763599	0	0	0	0	0	1.75363	18.2532	0	0	0	8.84959
ENSG00000250527	AL035661.1		20	24911284	24913619	1.76867	0	0	0	0	0	0	2.45419	0	0	0	0	0	1.86338	0	0	25.8759	0	0
ENSG00000232756	RP5-1185I7.1		7	77619701	77624488	4.39881	0	0	0	0	0	0	1.11811	0	0	18.6822	0	0	4.83681	0	0	0	2.90786	0
ENSG00000250439	RP11-271E2.1	FYVE, RhoGEF and PH domain containing 5 pseudogene (LOC100132526), non-coding RNA [Source:RefSeq DNA;Acc:NR_036481]	3	13974553	13978444	0	1.03511	3.14812	0	0	12.0391	0	1.29675	0	0	0	0	0	0	0	0	0	2.55178	11.7186
ENSG00000248221	RP11-1338A7.1		4	4477848	4483427	0.545472	3.72424	2.88571	0	11.6678	0	0	1.6344	0	0	0	0	0	1.10866	0	0	0	2.55178	7.67022
ENSG00000254896	RP11-861E23.1		11	133229924	133235975	14.1866	0	0.452924	0	0	12.0391	0	0.998008	0	0	0	0	0	4.02646	0	0	0	0	0
ENSG00000237104	AC018890.4		2	175647774	175652656	0	0	3.51652	0	0	0	0	1.27142	0	0	0	0	0	0	0	0	25.8759	0	1.01229
ENSG00000223806	NCRNA00114	non-protein coding RNA 114 [Source:HGNC Symbol;Acc:1265]	21	40110825	40140898	0.545472	3.59721	0	0	0	0	0	0	0	9.27833	0	0	0	0	18.2532	0	0	0	0
ENSG00000249487	AC013489.2		15	89128802	89147834	3.91771	0	0.893483	0	0	0	0	4.54993	10.0577	9.27833	0	0	0	2.97043	0	0	0	0	0
ENSG00000249134	AC022724.1		18	55471012	55474049	0	1.24827	0.599131	0	11.6678	0	0	0.842531	0	0	0	5.6013	7.80543	0.986028	0	0	0	0	2.90878
ENSG00000253394	RP11-1058B10.1		8	91233716	91581546	0.545472	0	0.329139	13.2216	0	0	0	0	0	0	0	0	0	1.75363	0	0	0	0	15.7064
ENSG00000227110	AC087859.1		3	7994492	8653610	1.09094	3.7593	6.46645	0	0	0	0	0.363365	0	0	0	8.46862	8.43497	1.86338	0	0	0	0	0.988553
ENSG00000235435	AC064865.1		2	146051845	146089415	2.69451	1.2277	1.37097	0	0	0	0	1.80937	0	0	0	0	0	4.51591	0	0	17.2506	2.55178	0
ENSG00000233258	RP11-219F10.1		10	85671410	85672678	2.84518	1.03511	0.658277	0	0	0	0	0.739382	0	0	0	0	8.43497	2.21732	0	13.6327	0	0	1.83736
ENSG00000189238	RP11-173C20.1		12	127210816	127230798	0.545472	0	2.73544	0	0	0	0	0.811634	10.0577	0	0	5.6013	0	2.89027	0	0	8.6253	0	0
ENSG00000238113	RP11-262H14.1		9	66457285	66470542	0.545472	0	0	0	0	0	0	1.55722	0	0	0	0	0	0	18.2532	0	0	0	10.9022
ENSG00000203897	RP11-475E11.5	spermatogenesis-related protein 7 (SRG7), non-coding RNA [Source:RefSeq DNA;Acc:NR_034168]	1	109399839	109401146	0	1.24827	1.08841	26.4431	0	0	0	0.31496	0	0	0	0	0	1.16417	0	0	0	0	0.988553
ENSG00000229494	AC012494.1		2	78315856	78354932	2.14904	2.47597	1.87721	0	0	0	0	12.9879	0	0	0	0	0	0.986028	0	0	8.6253	2.14337	0
ENSG00000255451	RP11-58K22.1		11	44490014	44491979	7.39067	15.0554	0	0	0	0	0	0.685392	0	0	0	0	0	0	0	0	0	3.22735	4.86062
ENSG00000236980	RP11-694I15.6		3	49215069	49229291	2.66876	2.72785	0.996447	0	0	0	0	0.927507	10.0577	0	0	0	0	2.84941	0	0	0	3.22735	7.69762
ENSG00000170858	AC006293.3		19	55219700	55224955	2.69451	0	4.71081	0	0	0	0	0	10.0577	0	0	0	0	0	0	0	8.6253	5.05123	0
ENSG00000182057	Z83851.3		22	42665759	42671202	0	0.887708	1.16859	0	0	0	0	7.77092	10.0577	0	0	0	0	2.6257	0	0	8.6253	0	0
ENSG00000232470	RP11-313D6.3		10	112629501	112631352	9.47533	2.2628	1.1906	0	0	0	0	0.31496	0	0	0	0	7.80543	3.83543	0	0	0	4.28675	1.95578
ENSG00000237476	XXbac-B135H6.15		22	21311380	21318967	3.30786	0.996159	0.404962	0	0	0	0	1.00642	0	0	0	0	15.6109	0	0	0	0	8.75345	1.01229
ENSG00000204990	RP5-842K16.1		7	141114183	141116190	8.48161	0.934085	1.91836	0	0	0	0	1.9912	0	0	0	4.23431	8.43497	1.86338	0	0	0	3.22735	0
ENSG00000248647	RP11-331K21.1		5	148543518	148656339	0	0	0	0	0	0	0	0	0	0	0	0	0	17.415	0	13.6327	0	0	0
ENSG00000240687	RP11-521D12.1		2	9778901	9789568	6.00237	1.8718	1.04992	0	0	0	0	1.87037	10.0577	0	0	4.23431	0	5.92611	0	0	0	0	0
ENSG00000226711	FAM66C	family with sequence similarity 66, member C [Source:HGNC Symbol;Acc:21644]	12	8332805	8368747	0	0	1.31038	13.2216	0	0	0	0.798945	0	0	0	0	0	6.07718	0	0	8.6253	0	0.972072
ENSG00000242094	RP11-154H23.1		3	71619406	71623608	5.07653	3.24059	0	0	0	0	0	2.08476	0	0	0	0	0	3.86421	0	0	0	0	16.6568
ENSG00000248802	RP11-184M15.2		4	129504154	129522562	0	0	0.404962	0	0	0	0	2.38132	0	0	18.6822	0	0	1.10866	0	0	0	5.47457	2.84262
ENSG00000234542	RP11-282I1.2		10	125333743	125343283	4.46318	1.2277	0.658277	13.2216	0	0	0	1.5942	0	0	0	0	0	3.64819	0	0	0	3.22735	2.83823
ENSG00000227467	RP11-169D4.1		11	72281704	72284273	0	3.53165	2.99794	0	11.6678	0	0	1.32213	0	0	0	0	0	0.789322	0	0	8.6253	0	1.92782
ENSG00000244344	RP11-122M14.2		1	211859864	211863445	3.93612	0	1.00639	0	11.6678	0	0	2.77973	0	0	0	5.6013	0	2.66216	0	0	0	2.20226	0.98371
ENSG00000223646	AC002463.3		7	112262433	112348135	0.545472	1.87477	0.428473	13.2216	0	0	0	2.98662	0	0	0	0	0	1.91387	0	0	0	7.9225	1.93671
ENSG00000253317	RP11-142A23.1		8	73108569	73114504	0.545472	0	0	0	23.3356	0	0	0	0	0	0	0	0	4.39158	0	0	0	2.55178	0
ENSG00000229525	AC053503.4		2	220253218	220268355	0	0	0.928269	0	0	0	0	3.59249	20.1155	0	0	4.23431	0	0	0	0	0	0	1.93671
ENSG00000230028	RP11-212D3.3		X	75107994	75109321	0.545472	0	2.05996	0	11.6678	0	15.0811	0.472486	0	0	0	0	0	0.9764	0	0	0	0	0
ENSG00000224810	RP11-538D16.2		1	182031812	182038388	0	0	0	13.2216	0	0	0	1.25272	10.0577	0	0	0	0	0.789322	0	0	0	5.45963	0
ENSG00000227003	AL591479.1		9	70645650	70648248	5.60757	2.64254	3.26252	0	0	0	0	1.99011	0	0	0	9.83561	0	0.964311	0	0	0	2.55178	3.91218
ENSG00000224037	RP4-781K5.7		1	234845005	234855723	2.29971	0.937051	0.833435	0	0	0	0	0.31496	10.0577	0	0	0	8.43497	4.06722	0	0	0	0	3.71782
ENSG00000245439	AL590303.1		6	117993976	117996447	1.76867	4.06919	0.74482	0	0	0	0	9.44712	0	0	0	0	0	1.16417	0	0	0	13.3887	0
ENSG00000224301	RP11-144G16.1		10	64883698	64885297	0	3.45155	1.59436	0	0	0	0	0.469706	0	0	18.6822	4.23431	0	0	0	0	0	2.14337	0
ENSG00000253519	AC106801.1		5	156992972	156996106	0	0	1.44479	0	0	0	0	0	0	0	18.6822	0	0	4.32892	0	0	0	5.10355	0.988553
ENSG00000226167	RP5-1073O3.5		1	114399257	114443859	2.29971	0	0.333654	13.2216	0	0	0	0.298609	10.0577	0	0	0	0	1.10866	0	0	0	3.22735	0
ENSG00000248343	RP11-556G22.2		4	21699073	21720649	0	0	4.56291	0	0	0	0	0	10.0577	0	0	4.23431	0	3.02755	0	0	8.6253	0	0
ENSG00000215424	MCM3AP-AS1	MCM3AP antisense RNA 1 (non-protein coding) [Source:HGNC Symbol;Acc:16417]	21	47649145	47671615	1.09094	0	4.69641	0	0	0	0	3.94911	0	0	0	0	15.6109	0	0	0	0	5.11011	0
ENSG00000235997	AC109642.1		2	30569525	30575297	0	0	5.40444	0	0	24.0781	0	0.939412	0	0	0	0	0	0	0	0	0	0	0
ENSG00000223855	AC147651.3		7	560028	564869	4.46318	0	11.9426	0	0	0	0	1.94615	0	0	0	5.6013	0	0.789322	0	0	0	0	5.6736
ENSG00000226924	AC139100.1		18	77905807	77929616	3.30786	0	0	0	0	0	0	0.363365	0	0	18.6822	0	0	8.04334	0	0	0	0	0
ENSG00000248150	RP1-167G20.1		5	16373470	16440190	0	1.24827	1.09127	0	0	0	0	1.97943	20.1155	0	0	0	0	4.96763	0	0	0	0	0.972072
ENSG00000237500	RP11-526P5.1		10	2541913	2542762	0	3.68944	2.3993	0	0	0	0	1.071	10.0577	9.27833	0	0	0	0.964311	0	0	0	0	2.8712
ENSG00000248332	RP11-236J17.5		11	8081585	8090920	0	0.937715	0.434489	13.2216	0	0	0	1.78362	0	0	0	0	0	2.40296	0	0	8.6253	2.9228	0
ENSG00000232788	AC078883.3		2	173328990	173330750	0.545472	0	0	0	0	0	0	0	10.0577	0	0	0	0	0	0	13.6327	0	2.20226	3.87342
ENSG00000233969	RP5-1006K12.1		7	119808399	119826118	1.76867	1.24827	0.226462	13.2216	0	12.0391	0	0.782603	0	0	0	0	0	0.964311	0	0	0	0	0
ENSG00000254136	RP11-546K22.2		8	52908770	52920915	4.94428	8.72958	1.97913	0	0	0	0	1.25468	0	0	0	0	0	0.964311	0	0	0	0	12.3761
ENSG00000234684	RP11-314N13.4		20	1306065	1358827	0	0	3.51957	0	0	0	0	1.49988	0	9.27833	0	9.83561	0	2.93637	0	0	0	2.14337	0.972072
ENSG00000230159	RP11-232D9.3		X	115826878	115828156	0	0	0	0	0	0	0	0	30.1732	0	0	0	0	0	0	0	0	0	0
ENSG00000223725	AC007879.5		2	208104588	208394519	7.66298	0.934085	1.0103	0	0	0	0	2.78512	0	0	0	4.23431	7.80543	5.69678	0	0	0	0	0
ENSG00000228858	RP11-95K23.5		9	41285357	41287306	0.545472	0	0.404962	0	0	0	0	29.1703	0	0	0	0	0	0	0	0	0	0	0
ENSG00000223597	CTD-2296D1.5		5	7373230	7379903	3.30786	1.93387	1.72434	13.2216	0	0	0	0.604053	0	0	0	5.6013	0	3.72675	0	0	0	0	0
ENSG00000250751	RP11-613C6.2		17	47785696	47797422	11.4593	0.934085	6.82191	0	0	0	0	1.27615	0	0	0	0	0	2.54295	0	0	0	3.22735	3.84327
ENSG00000235374	C21orf122	chromosome 21 open reading frame 122 [Source:HGNC Symbol;Acc:23131]	21	46491648	46494080	0	1.41409	1.38119	0	0	0	0	0	0	9.27833	0	0	0	1.10866	0	0	8.6253	2.55178	5.71455
ENSG00000226453	RP11-379B8.1		6	82554902	82643197	0.545472	0	0	0	11.6678	0	0	0.472486	0	0	0	0	0	17.3488	0	0	0	0	0
ENSG00000223382	RP1-65J11.1		1	31297075	31306693	2.84518	0	0.428473	26.4431	0	0	0	0.301018	0	0	0	0	0	0	0	0	0	0	0
ENSG00000230156	RP11-297I6.4		13	107306264	107324511	2.66876	4.9517	1.47708	0	0	0	0	0	0	0	0	0	7.80543	2.73003	0	0	0	9.35292	1.01229
ENSG00000180422	NCRNA00304	non-protein coding RNA 304 [Source:HGNC Symbol;Acc:26713]	16	89225628	89230083	0	0	1.11994	0	0	0	0	3.82447	10.0577	0	0	0	0	5.37339	0	0	8.6253	0	0.972072
ENSG00000255433	AP000479.1		11	56615954	56645554	8.76477	1.03511	0.450786	0	0	12.0391	0	2.15449	0	0	0	4.23431	0	1.2943	0	0	0	0	0
ENSG00000152931	PART1	prostate androgen-regulated transcript 1 (non-protein coding) [Source:HGNC Symbol;Acc:17263]	5	59783540	59843484	1.63641	0	22.1714	0	0	0	0	0.943318	0	0	0	0	0	0.964311	0	0	0	3.22735	1.01229
ENSG00000225226	AC007250.4		2	58503012	58523683	0	0	5.60255	0	0	12.0391	0	1.31776	0	0	0	0	0	5.88402	0	0	0	5.11011	0
ENSG00000248790	RP11-319G6.3		3	139185272	139185637	2.29971	0	1.60891	0	0	0	0	0.746133	0	0	0	0	0	0	18.2532	0	0	5.10355	1.83736
ENSG00000224407	RP5-956O18.3		1	230416058	230417639	2.14904	2.69018	2.29503	0	0	0	0	0.301018	0	0	18.6822	0	0	0.789322	0	0	0	2.90786	0
ENSG00000237125	RP11-471J12.1	Nbla00301 (NBLA00301), non-coding RNA [Source:RefSeq DNA;Acc:NR_003679]	4	174448421	174512475	7.70667	3.49604	0.679386	0	0	0	0	0.525975	10.0577	0	0	0	0	3.09976	0	0	0	2.14337	2.01316
ENSG00000248045	AC022098.3		19	14247991	14282071	2.31414	3.02369	0.660951	13.2216	0	0	0	0.44827	0	0	0	0	0	0	0	0	0	2.20226	7.84607
ENSG00000237975	RP1-14N1.2		1	152161827	152339163	0	5.72517	3.01174	0	0	0	0	2.13683	0	0	0	9.83561	0	5.77542	0	0	0	2.20226	1.00087
ENSG00000234362	AC104654.2		2	42158739	42160863	0	0.902423	0.847659	0	11.6678	0	15.0811	0	0	0	0	0	0	1.16417	0	0	0	0	0
ENSG00000256115	RP11-319E16.1		12	5343163	5352317	5.70479	0	0.411165	0	0	12.0391	0	0.808521	0	0	0	0	0	0	0	0	0	0	10.6985
ENSG00000224665	RP11-197N18.2		12	123459867	123467454	0	7.1202	0.643067	0	0	12.0391	0	0.291113	0	0	0	0	0	8.56217	0	0	0	0	0.988553
ENSG00000231163	AL121980.1		1	34334554	34351059	0.545472	1.03511	0	0	11.6678	0	0	0.843811	0	0	0	5.6013	7.80543	0	0	0	0	2.14337	0
ENSG00000256538	RP11-847H18.3		12	34190373	34209675	0	2.70072	0.631424	0	0	12.0391	0	0.608488	0	0	0	0	0	0	0	13.6327	0	0	0
ENSG00000254665	RP11-152H18.3		11	8714904	8718154	0	1.27533	0.667308	13.2216	11.6678	0	0	1.00518	0	0	0	0	0	1.67614	0	0	0	0	0
ENSG00000254863	RP11-831A10.2		11	119858663	119865746	0	0	1.72669	0	0	12.0391	0	2.84578	0	9.27833	0	0	0	2.58859	0	0	0	0	1.01229
ENSG00000226197	RP11-536O18.1		9	13446525	13487510	3.30786	1.41485	0	0	0	0	0	0	0	0	0	8.46862	0	0	0	0	0	16.2888	0
ENSG00000230471	LA16c-2F2.8		22	16373081	16377055	4.30517	1.03511	3.58586	0	0	0	15.0811	0.317376	0	0	0	0	0	4.15773	0	0	0	0	0.98371
ENSG00000232468	AL022069.1		6	166756132	166764957	2.29971	5.08867	0.411165	0	0	0	0	0	10.0577	0	0	0	0	4.87002	0	0	0	0	6.73809
ENSG00000253628	RP11-536N17.1		5	172243624	172246961	4.62827	3.94511	1.82022	0	11.6678	0	0	1.85063	0	0	0	0	0	2.97204	0	0	0	2.55178	0
ENSG00000215417	MIR17HG	miR-17-92 cluster host gene (non-protein coding) [Source:HGNC Symbol;Acc:23564]	13	92000074	92006833	0	7.85193	14.6133	0	0	0	0	2.37767	0	0	0	0	0	0	0	0	0	2.55178	1.98819
ENSG00000228353	RP11-184A2.2		10	3810107	3810943	2.66876	0.887708	0	0	0	12.0391	0	1.22973	0	0	0	0	0	0	0	0	8.6253	2.90786	1.01229
ENSG00000254027	RP11-363E6.3		8	82192106	82193681	2.31414	0.902423	0.599131	0	0	0	0	1.05979	20.1155	0	0	0	0	0	0	0	0	4.28675	0
ENSG00000226851	AC004112.4		7	111968244	112049678	0	0	4.34437	0	0	0	0	1.23987	10.0577	0	0	0	0	0	0	13.6327	0	0	0
ENSG00000224818	RP11-134G8.8		1	201433511	201434274	1.76867	1.2277	3.98915	13.2216	0	0	0	0.631383	0	0	0	0	8.43497	0	0	0	0	0	0
ENSG00000233417	RP4-742N3.1		7	119781070	119783050	0	1.41485	0.885393	0	0	0	0	2.47901	0	0	0	15.4369	0	0.986028	0	0	0	2.20226	5.80562
ENSG00000248663	CTC-504A5.1		5	116751205	116881993	0	1.24827	3.22535	0	0	0	0	1.82059	0	0	0	0	7.80543	3.53951	0	0	8.6253	0	2.94011
ENSG00000236536	AC003986.7		7	19159556	19161539	0	9.991	0.654935	0	0	0	15.0811	0.363365	0	0	0	0	0	2.08362	0	0	0	0	0.972072
ENSG00000250917	RP4-785G19.5		20	32822646	32868979	0	2.28338	1.66532	0	0	12.0391	0	1.58816	0	0	0	0	0	6.60949	0	0	0	0	4.90074
ENSG00000254109	CTD-3107M8.4		8	30239635	30242917	0	2.22385	5.10583	0	0	12.0391	0	4.49202	0	0	0	4.23431	0	0.9764	0	0	0	0	0
ENSG00000237992	AC010096.2		2	19675211	19688611	0	12.7232	0	0	0	0	0	0.750148	0	0	0	0	0	1.93559	0	13.6327	0	0	0
ENSG00000197503	C12orf67	chromosome 12 open reading frame 67 [Source:HGNC Symbol;Acc:26557]	12	24719898	24737102	4.43742	0	1.95458	0	0	0	0	0	0	0	18.6822	0	0	0	0	0	0	0	3.95005
ENSG00000249618	RP11-422J15.1		4	130692814	130876523	0	0	0.416605	0	0	0	0	2.90476	0	0	0	0	8.43497	0	0	0	17.2506	0	0
ENSG00000244008	RP11-321E8.3		7	63580809	63611099	6.15304	3.43791	0.855748	0	0	0	0	1.03866	10.0577	0	0	0	0	0	0	0	0	4.40451	2.98939
ENSG00000236558	AC138655.6		2	47713153	47715691	0	0	1.94256	0	0	0	0	1.82297	0	0	18.6822	0	0	1.57864	0	0	0	2.90786	1.98819
ENSG00000244846	AL671309.1		9	74381169	74383463	4.59941	3.43063	1.05205	0	0	0	0	0.678325	0	0	0	9.83561	0	1.94071	0	0	0	5.4296	1.95578
ENSG00000230955	RP11-109P14.10		1	38326369	38327252	2.29971	1.03511	1.0103	0	0	0	0	1.34172	0	0	0	12.7029	8.43497	2.09469	0	0	0	0	0
ENSG00000223561	AC003090.1		7	25632971	25790614	0	0	2.23991	0	0	12.0391	0	0.336035	0	9.26836	0	4.23431	0	0.789322	0	0	0	0	0
ENSG00000256195	RP11-64D24.4		11	114231357	114250767	0	4.89022	0.867391	0	0	0	15.0811	0	0	0	0	0	0	0	0	0	0	2.20226	5.82859
ENSG00000231937	RP11-329E24.6		X	151307355	151355329	0.545472	3.51049	5.32905	13.2216	0	0	0	0	0	0	0	4.23431	0	0	0	0	0	0	1.98819
ENSG00000245424	AC011037.1		8	68256069	68404082	0	0	1.86427	0	0	24.0781	0	0	0	0	0	0	0	1.67614	0	0	0	0	0.98371
ENSG00000251067	AC123912.2		19	21770235	21776808	0	1.2277	0	0	0	0	0	0	0	0	0	0	0	0	0	27.2654	0	0	0
ENSG00000231769	RP1-8B1.4		6	46064830	46097443	0	0	0	0	11.6678	0	0	6.51971	0	9.27833	0	0	0	0.986028	0	0	0	0	0
ENSG00000251273	RP11-549K20.1		5	25126414	25190765	0	0.996159	4.34779	0	0	0	0	2.26091	0	0	0	0	0	0	0	0	17.2506	2.55178	1.01229
ENSG00000255693	RP11-766N7.3		12	65277174	65371302	3.30786	0.902423	3.36764	0	0	0	0	0.900354	0	0	0	4.23431	0	4.935	0	0	8.6253	2.14337	0
ENSG00000244300	RP11-475N22.4		3	128208055	128221191	0	0	0	0	0	0	0	0	0	0	0	8.46862	15.6109	0	0	0	0	4.28675	0
ENSG00000232686	RP5-835G14.1		1	235333435	235334206	2.29971	2.41101	1.52124	0	11.6678	0	0	0.520463	0	0	0	0	7.80543	1.16417	0	0	0	0	0.972072
ENSG00000226659	RP11-137H2.4		10	82289353	82295698	0	1.03511	2.09667	0	0	0	0	1.27079	20.1155	0	0	0	0	0	0	0	0	0	3.83185
ENSG00000223631	AC073869.19		2	132160474	132166622	3.30786	6.50943	0.839638	0	11.6678	0	0	0.998116	0	0	0	0	0	0.986028	0	0	0	0	3.93484
ENSG00000239604	AC024597.1		10	64099347	64134886	0.545472	0.887708	18.9612	0	0	0	0	1.04644	0	0	0	0	0	3.57412	0	0	0	3.22735	0
ENSG00000228925	AC016722.4		2	47126414	47135817	0	2.41101	0.745744	0	11.6678	0	0	5.18026	0	0	0	0	0	4.91115	0	0	0	2.20226	1.01229
ENSG00000227863	AC002383.2		7	89073286	89123576	6.91355	0	0.428473	0	0	12.0391	0	2.00496	0	0	0	0	0	0.9764	0	0	0	4.75403	0.972072
ENSG00000246710	AC009133.2		16	29756600	29761818	4.30517	0	7.02181	0	0	0	0	2.2928	0	0	0	0	7.80543	4.75418	0	0	0	0	1.85891
ENSG00000250235	RP11-612J15.2		4	157852970	157854283	3.30786	0	1.27235	0	0	0	15.0811	0.907246	0	0	0	5.6013	0	1.86338	0	0	0	0	0
ENSG00000234678	RP11-465N4.4		1	201969222	201979481	0	0.996159	0.329139	13.2216	0	0	0	5.67205	0	0	0	0	7.80543	0	0	0	0	0	0
ENSG00000251088	RP11-325B23.2		3	97952495	98176742	1.09094	0	3.71011	0	11.6678	0	0	1.47875	10.0577	0	0	0	0	0	0	0	0	0	0
ENSG00000224119	AP001271.5		11	70412492	70417428	14.2581	3.18215	0.839451	0	0	0	0	0.841804	0	0	0	0	0	7.84683	0	0	0	0	0.98371
ENSG00000226044	RP11-463P17.1		10	48324788	48332197	6.69851	1.11618	0.333654	0	0	0	0	0.772396	0	9.26836	0	0	0	8.76167	0	0	0	0	0.972072
ENSG00000227230	RP11-261C10.5		1	243299200	243303890	2.85961	0.934085	2.24501	0	0	0	0	5.29286	0	0	0	4.23431	0	3.70397	0	0	8.6253	0	0
ENSG00000247157	RP11-434C1.1		12	11700964	11743303	2.72736	0	0.226462	0	0	0	0	3.1832	10.0577	0	0	0	0	3.06965	0	0	8.6253	0	0
ENSG00000235513	RP4-756G23.5		22	41605126	41613631	7.70667	0.887708	1.30402	0	11.6678	0	0	0.871718	0	0	0	0	0	4.47854	0	0	0	0	0.972072
ENSG00000243754	RP11-125K10.4		9	4860454	4885917	3.7597	0.902423	2.55927	0	0	0	0	1.79558	10.0577	0	0	0	7.80543	0.9764	0	0	0	0	0
ENSG00000226113	RP11-672F9.1		10	38536850	38622083	10.1811	1.2277	1.50502	0	0	0	0	0.920663	0	0	0	0	8.43497	0.789322	0	0	0	4.75403	0
ENSG00000226913	RP11-949J7.7		3	49586739	49591799	2.31414	2.28338	1.86339	0	0	0	0	2.68721	0	0	0	0	0	1.95034	0	0	0	8.04785	8.66502
ENSG00000223760	AC018804.4		2	130887194	130896990	0.545472	2.0186	1.64289	0	0	0	0	0.386784	10.0577	0	0	0	0	7.56094	0	0	0	2.55178	2.98906
ENSG00000241163	RP11-398A8.3		3	72084670	72291716	2.29971	0.902423	4.21363	0	0	0	0	4.80105	0	0	0	0	0	0.9764	0	0	0	0	14.5499
ENSG00000197558	SSPO	SCO-spondin homolog (Bos taurus) [Source:HGNC Symbol;Acc:21998]	7	149473131	149531068	1.09094	2.18236	3.27559	0	0	0	0	2.05618	0	0	0	0	7.80543	1.67614	0	0	0	7.65533	1.95578
ENSG00000249169	CTC-529L17.1		5	91990555	92014848	5.38902	0	0.738616	0	0	0	0	3.62215	10.0577	0	0	0	0	3.95734	0	0	0	2.9228	0.988553
ENSG00000230387	RP4-737E23.2		20	23168765	23170944	3.23998	0.887708	0	0	0	0	0	0.525975	0	0	0	0	0	1.73888	18.2532	0	0	0	2.98455
ENSG00000229922	RP11-240M16.1		6	138266503	138293659	0	0	0	0	0	0	0	0	0	0	0	0	0	27.6235	0	0	0	0	0
ENSG00000227403	AC009299.3		2	162101250	162105561	0	0	1.56436	13.2216	0	0	0	3.0967	0	0	0	0	0	1.10866	0	0	8.6253	0	0
ENSG00000246139	RP11-592O2.1		12	125343129	125362549	0.545472	0.934085	2.75004	13.2216	0	0	0	2.25989	0	0	0	4.23431	0	0.789322	0	0	0	0	2.84746
ENSG00000215483	RP11-350A18.1	tubulin tyrosine ligase (TTL), transcript variant TTL-T, non-coding RNA [Source:RefSeq DNA;Acc:NR_024505]	13	41025131	41055143	2.29971	0	0	0	0	0	0	0	0	0	18.6822	5.6013	0	0.986028	0	0	0	0	0
ENSG00000234864	AL022344.5		10	43191483	43201901	1.76867	0	0.404962	0	0	0	0	1.44185	10.0577	0	0	5.6013	0	8.22685	0	0	0	0	0
ENSG00000227477	RP5-1069P2.4		20	43592435	43595043	3.30786	0	0.450786	0	0	0	0	0	0	0	0	0	0	0	0	13.6327	0	9.07294	0.98371
ENSG00000249677	RP11-395P13.3		5	124705858	124706617	0	3.01783	0.740304	0	0	0	0	4.38415	10.0577	0	0	0	0	5.0917	0	0	0	2.14337	1.97294
ENSG00000229498	AC105053.3		2	86042253	86052514	0	0	3.25596	0	0	0	0	0.386784	0	0	0	0	0	4.51722	0	0	8.6253	10.5996	0
ENSG00000255193	RP11-945A11.1		11	23752134	23818516	0	3.16091	2.00106	0	0	0	0	1.05268	0	0	0	0	0	0	18.2532	0	0	2.90786	0
ENSG00000236137	RP11-27K13.3		1	117568104	117602112	2.69451	1.24827	7.30094	0	0	0	0	7.63634	0	0	0	0	0	2.6527	0	0	0	5.83065	0
ENSG00000183535	NCRNA00175	non-protein coding RNA 175 [Source:HGNC Symbol;Acc:23132]	21	46839631	46844985	4.59941	0	0	0	0	0	0	0	0	0	0	0	0	2.11373	0	0	8.6253	2.14337	9.85654
ENSG00000228980	RP11-702L6.4		3	109128837	109214014	0	0.887708	0	26.4431	0	0	0	0	0	0	0	0	0	0	0	0	0	0	0
ENSG00000213742	RP4-694B14.5		20	25604681	25658710	1.09094	1.41485	0.411165	0	0	0	0	1.11259	0	0	0	4.23431	0	4.26473	0	0	8.6253	5.12505	0.988553
ENSG00000253838	RP11-44K6.2		8	39771748	39773240	0	0	27.2584	0	0	0	0	0	0	0	0	0	0	0	0	0	0	0	0
ENSG00000249638	CTD-2296D1.3		5	7363092	7364644	4.94428	0.887708	1.63009	0	0	0	0	1.09725	0	0	0	0	0	3.06965	0	0	0	2.9228	12.6842
ENSG00000231868	RP1-202O8.2		1	6503094	6507066	0.545472	0	8.0362	0	0	0	0	0.6753	0	0	0	16.9372	0	0	0	0	0	0	0.98371
ENSG00000241471	RP11-336K24.4		1	155955166	155976861	1.09094	0	0.809924	0	0	0	0	22.9369	0	0	0	0	0	2.32834	0	0	0	0	0
ENSG00000230248	RP1-128O3.4		6	108596846	108597750	0	3.15794	0.771835	0	11.6678	0	0	0.386784	0	0	0	0	0	0	0	0	8.6253	2.55178	0
ENSG00000224382	RP11-34C15.1		10	4426438	4452804	1.09094	2.16541	4.61205	13.2216	0	0	0	4.12484	0	0	0	0	0	1.92862	0	0	0	0	0
ENSG00000246151	AL158032.1		13	21872480	21876009	1.76867	0	0.74482	0	11.6678	0	0	1.82252	10.0577	0	0	0	0	0.986028	0	0	0	0	0
ENSG00000250934	RP11-71E19.1		3	125985639	126010122	0	0	0.428473	13.2216	0	0	0	1.5506	0	0	0	8.46862	0	1.16417	0	0	0	2.20226	0
ENSG00000256370	AL353660.1		13	74862164	74982939	0	0	0.404962	0	0	0	0	11.9805	0	0	0	0	0	0.964311	0	13.6327	0	0	0
ENSG00000246032	AC104597.1		7	142493795	142497628	0.545472	2.17775	1.52474	0	0	0	0	0.875813	0	0	0	0	0	4.56641	0	0	0	5.84559	11.4267
ENSG00000254721	RP11-805J14.5		11	70052397	70053496	3.39065	3.74481	2.50835	0	0	0	0	1.99452	0	0	0	0	7.80543	2.08506	0	0	0	5.37072	0
ENSG00000251613	CTC-347C20.1		5	71982939	72058554	0	2.15069	3.73903	0	0	0	0	1.13607	0	0	0	5.6013	0	4.58116	0	0	8.6253	0	0.988553
ENSG00000255694	AC232323.1	REX1, RNA exonuclease 1 homolog (S. cerevisiae)-like 2 (pseudogene) (REXO1L2P), non-coding RNA [Source:RefSeq DNA;Acc:NR_003594]	8	86776919	86804581	2.14904	0	3.67326	0	0	12.0391	0	0.317376	0	0	0	0	0	0	0	0	8.6253	0	0
ENSG00000254024	KB-1562D12.1		8	102473405	102504727	0	0	0	0	0	0	0	14.7539	0	0	0	4.23431	7.80543	0	0	0	0	0	0
ENSG00000229081	RP11-432J24.6		10	134334331	134335953	0	0	1.19826	0	0	0	15.0811	2.01642	0	0	0	0	8.43497	0	0	0	0	0	0
ENSG00000229656	RP11-462L8.1		10	33247773	33371030	0.545472	1.03511	0.411165	0	0	0	0	2.99106	10.0577	0	0	0	8.43497	0	0	0	0	3.22735	0
ENSG00000234754	RP11-421L10.1		1	221503422	221509638	0	4.31373	0.839638	0	0	0	0	1.63124	0	0	18.6822	0	0	1.16417	0	0	0	0	0
ENSG00000225209	RP11-358M3.1		7	67485240	67497677	0	2.21304	3.59036	0	0	12.0391	0	1.44116	0	0	0	4.23431	0	3.07109	0	0	0	0	0
ENSG00000253356	RP11-90P5.2		8	38006259	38021290	1.63641	0	6.56806	0	0	0	0	3.79124	10.0577	0	0	0	0	1.94071	0	0	0	2.55178	0
ENSG00000251565	AC079062.1		18	70818476	70931715	0	1.82542	3.32918	0	0	0	0	5.31244	0	9.27833	0	0	0	5.75758	0	0	0	0	1.00087
ENSG00000237987	RP11-503C24.2		6	168625959	168627197	0	4.44177	1.20632	13.2216	0	0	0	0.746133	0	0	0	0	0	3.88593	0	0	0	2.9228	0
ENSG00000203347	AC007785.1		19	46561088	46580887	3.91771	1.11618	0	0	11.6678	0	0	0.317376	0	0	0	0	0	7.21648	0	0	0	2.14337	0
ENSG00000253894	RP11-45K10.2		8	64378407	64388040	0	1.28663	4.21097	0	0	0	0	1.3426	0	0	0	0	0	2.25861	0	0	17.2506	0	0
ENSG00000244078	RP11-431I8.1		3	159944270	159945841	15.1511	1.11618	0.450786	0	0	0	0	0.464916	0	0	0	0	0	2.08362	0	0	0	5.12505	1.92782
ENSG00000224231	AC069394.1		2	138859454	138863475	0	0	0	0	0	0	0	1.68053	20.1155	0	0	0	0	4.51608	0	0	0	0	0
ENSG00000229042	RP1-232N11.2		20	41314123	41316285	0	1.2277	0.404962	0	0	0	0	0	10.0577	0	0	0	0	9.31689	0	0	0	4.28675	1.01229
ENSG00000234698	RP11-112L6.2		20	48782899	48788279	4.43742	1.41485	0	0	11.6678	0	0	0	0	0	0	0	0	0	0	0	0	8.76839	0
ENSG00000224405	RP11-90M5.4		13	30492784	30500788	3.85333	0.996159	1.99701	0	0	0	0	0.775851	0	0	0	0	0	2.88401	0	0	8.6253	5.10355	1.92782
ENSG00000232900	RP4-697P8.3		20	10855981	10889920	1.76867	0	3.19298	0	0	0	0	1.18773	0	0	0	0	7.80543	6.1518	0	0	0	2.20226	3.8471
ENSG00000203362	RP3-337H4.8		6	43555967	43559099	0.545472	0	6.91863	0	0	0	0	0	10.0577	0	0	0	0	0	0	0	8.6253	0	0
ENSG00000234597	AC010096.1		2	19657981	19668722	0.545472	0	1.20632	0	0	0	0	0.525975	0	0	0	5.6013	0	0	18.2532	0	0	0	0
ENSG00000254042	CTC-558O2.1		5	168133572	168147889	3.30786	2.18532	0.74482	13.2216	0	0	0	2.38033	0	0	0	0	0	1.16417	0	0	0	2.14337	0.98371
ENSG00000234199	AC010982.1		2	114737146	114764879	0	0.996159	0	0	11.6678	0	0	0.512448	0	0	0	0	0	0	0	0	8.6253	2.20226	1.98819
ENSG00000234817	RP3-400B16.1		6	4136306	4157619	3.78546	0	0.809924	0	0	0	0	0.268018	0	0	0	0	0	2.87552	18.2532	0	0	0	0
ENSG00000245571	AP001258.4		11	58897606	58910488	3.30786	1.92282	1.40141	0	0	0	0	2.25975	0	0	0	0	0	7.6945	0	0	0	5.37072	3.98903
ENSG00000177640	CASC2	cancer susceptibility candidate 2 [Source:HGNC Symbol;Acc:22933]	10	119805790	119969663	0.545472	5.24447	2.01837	0	0	0	0	0.829824	10.0577	0	0	0	0	3.22239	0	0	0	0	4.00258
ENSG00000226386	RP11-51B10.2		10	35104695	35105314	2.84518	2.53027	1.50502	0	0	0	0	0.819071	10.0577	0	0	0	0	2.2707	0	0	0	5.84559	0
ENSG00000238007	AC024619.2		17	27339883	27343530	0	1.03511	0	0	0	0	0	0.840935	20.1155	0	0	0	0	0	0	0	0	0	3.85564
ENSG00000232194	RP1-313L4.3		1	167789644	167790462	0	5.54869	3.70002	0	0	0	0	2.94817	0	0	0	0	0	0	0	13.6327	0	0	0
ENSG00000224459	RP11-169K16.4		1	16066546	16076391	0	0	1.32032	13.2216	0	0	0	1.06736	0	0	0	4.23431	0	1.67614	0	0	0	4.28675	0
ENSG00000255453	AP000640.8		11	59561584	59562189	0	6.67586	0.555601	0	0	0	0	1.09754	0	0	0	0	15.6109	0	0	0	0	0	1.85891
ENSG00000246263	KB-431C1.4		8	103251622	103265561	0	3.98051	0	0	0	0	0	2.25949	0	0	0	4.23431	0	1.67614	0	13.6327	0	0	0
ENSG00000239523	RP11-202D20.1		3	123304389	123363415	3.39065	0	2.00583	0	0	12.0391	0	3.16082	0	0	0	0	0	4.1942	0	0	0	0	0.988553
ENSG00000254102	RP11-21C4.1		8	65486863	65494445	3.85333	0	1.77055	13.2216	0	0	0	2.52158	0	0	0	0	0	0	0	0	0	4.40451	0
ENSG00000237773	AC003075.4		7	17319458	17338981	0.545472	0.902423	0.226462	0	0	0	0	3.64271	10.0577	0	0	0	0	4.54908	0	0	0	5.81571	0
ENSG00000248894	AC019206.1		2	70016684	70026080	0	0	0.555601	0	11.6678	0	0	1.9293	0	0	0	0	0	2.9292	0	0	8.6253	0	0
ENSG00000232184	RP11-370K11.1		1	243866159	243904123	0	0	0.662793	0	0	0	0	2.39157	10.0577	0	0	4.23431	0	4.01224	0	0	0	4.34563	0
ENSG00000239666	RP11-459F3.6		10	99625988	99631337	11.4313	0	0	0	0	0	0	0	0	0	0	0	0	12.0489	0	0	0	2.20226	0
ENSG00000214738	ABHD11-AS2	ABHD11 antisense RNA 2 (non-protein coding) [Source:HGNC Symbol;Acc:40012]	7	73150728	73152026	2.31414	0.934085	2.86845	0	0	0	0	0.336035	10.0577	0	0	0	0	0.789322	0	0	0	6.43012	1.93671
ENSG00000236049	AC104777.2		2	151409046	151428735	0	1.11618	0	0	0	0	0	0.508353	0	0	0	4.23431	0	2.54295	0	0	17.2506	0	0
ENSG00000231297	RP11-459F1.2		6	166513153	166526761	3.85333	1.41409	1.57183	0	0	0	0	0.507833	0	0	0	0	0	0	0	0	17.2506	0	1.00087
ENSG00000233096	RP11-520A21.1		3	41012032	41013069	3.91771	2.51433	1.37173	0	0	12.0391	0	0.604053	0	0	0	0	0	4.05568	0	0	0	0	1.01229
ENSG00000250141	RP11-208N20.1		4	142491084	142497230	0	2.31727	0.879259	0	11.6678	0	0	1.98868	0	0	0	0	0	0	0	0	8.6253	0	0
ENSG00000234647	RP11-503C24.4		6	168643618	168663261	1.09094	0.934085	0.868979	0	0	0	0	6.4959	0	0	0	0	8.43497	2.65254	0	0	0	2.14337	2.82107
ENSG00000230920	RP11-527D15.1		9	9799423	9803784	0.545472	2.49654	3.81173	13.2216	0	0	0	1.27493	0	0	0	0	0	1.10866	0	0	0	0	2.97971
ENSG00000234793	AC114730.7		2	242694208	242695155	2.29971	2.15069	1.28558	0	11.6678	0	0	0.317376	0	0	0	0	0	3.62264	0	0	0	2.14337	1.92782
ENSG00000241560	RP11-364F11.1		3	114070658	114107825	0	0	1.06324	0	0	0	0	0	20.1155	0	0	4.23431	0	0	0	0	0	0	0
ENSG00000246225	RP11-17A1.3		11	22850926	22966939	0.545472	1.41409	8.66492	0	0	0	0	0.795406	0	0	0	4.23431	7.80543	0.964311	0	0	0	0	0.98371
ENSG00000236883	AP001615.9		21	43159533	43161468	0	0.937715	0.411165	13.2216	0	0	0	0.765645	0	0	0	0	7.80543	0	0	0	0	2.20226	0
ENSG00000205885	ABC12-49244600F4.3		12	7260648	7275097	0	0.887708	0	0	0	0	15.0811	3.66508	0	0	0	0	0	1.2943	0	0	0	2.55178	1.85891
ENSG00000204117	RP4-640H8.2		20	36305312	36311636	3.30786	0	2.28063	0	0	0	0	1.43916	10.0577	0	0	0	0	8.22213	0	0	0	0	0
ENSG00000249396	RP11-1C1.4		5	10493639	10502840	0	8.3538	0	0	0	0	0	0	0	0	0	0	0	16.9089	0	0	0	0	0
ENSG00000224020	MIR181A2HG	MIR181A2 host gene (non-protein coding) [Source:HGNC Symbol;Acc:37188]	9	127420746	127460910	0	0	0.404962	0	11.6678	0	0	0.71364	0	0	0	0	0	10.4099	0	0	0	0	1.98819
ENSG00000151303	AGAP11	ankyrin repeat and GTPase domain Arf GTPase activating protein 11 [Source:HGNC Symbol;Acc:29421]	10	88730498	88769960	0	2.23235	5.54054	0	0	0	0	1.4602	10.0577	0	0	0	0	3.91277	0	0	0	0	1.94414
ENSG00000237670	AC080094.1		2	17151301	17155764	2.66876	0	0.450786	0	0	0	0	0.819071	0	0	0	0	7.80543	13.3652	0	0	0	0	0
ENSG00000236963	RP4-749H3.1		1	20687072	20757727	0.545472	5.422	0	13.2216	0	0	0	0	0	0	0	0	0	0.949559	0	0	0	0	4.85713
ENSG00000228538	AC009411.1		2	21861303	21872435	0	2.89159	0.776351	0	0	0	0	0	0	0	0	5.6013	0	15.6726	0	0	0	0	0
ENSG00000224467	AC009313.1		2	161952742	162016735	2.14904	1.24827	0.677248	0	0	0	0	1.48104	0	0	0	0	7.80543	3.20817	0	0	0	4.40451	3.95684
ENSG00000235717	AC068542.2		2	115591407	115593165	0.545472	0	0.428473	0	0	0	0	0.464916	0	0	0	4.23431	0	0.964311	18.2532	0	0	0	0
ENSG00000203472	AC009163.1		16	75507023	75529305	0.545472	2.21238	0.226462	0	11.6678	0	0	5.61177	0	0	0	0	0	2.45847	0	0	0	2.14337	0
ENSG00000234991	RP4-743D20.1		1	232447238	232448857	3.85333	0	0.679386	0	0	12.0391	0	2.11635	0	0	0	0	0	3.24779	0	0	0	0	2.89989
ENSG00000256906	RP11-474D1.2		12	130554870	130557230	2.14904	1.82542	1.03362	0	0	0	0	0	10.0577	0	0	0	0	1.10866	0	0	8.6253	0	0
ENSG00000225613	RP11-771D21.2		6	52011612	52016223	0	5.22714	0.965078	0	0	0	0	0	0	0	0	0	15.6109	0	0	0	0	0	2.98455
ENSG00000247586	AC021752.1		15	51132073	51200796	0	5.57299	2.76584	0	11.6678	0	0	0.798945	0	0	0	0	0	0.9764	0	0	0	0	3.00048
ENSG00000226476	RP11-776H12.1		1	61005921	61106163	1.09094	0	2.25835	0	11.6678	0	0	0.268018	0	0	0	0	0	0.789322	0	0	8.6253	0	0
ENSG00000226833	AC097724.3		2	28931819	28959071	0	0	2.08502	0	11.6678	0	0	0.44827	0	0	0	5.6013	0	0.9764	0	0	0	0	3.90477
ENSG00000256481	RP11-21A7A.4		11	63849162	63854647	5.97662	0	0	0	0	0	0	0	10.0577	0	0	0	0	0	0	0	8.6253	0	0
ENSG00000230396	RP11-366O20.2		9	127885377	127886583	4.8178	2.16541	0.411165	0	0	0	0	1.51763	0	0	0	0	0	1.89798	0	0	8.6253	3.22735	1.98819
ENSG00000253321	RP11-61G23.2		5	89648854	89652426	0	2.18532	1.23055	0	0	0	0	1.86923	10.0577	0	0	5.6013	0	0.789322	0	0	0	0	2.91153
ENSG00000230392	RP5-1139I1.1		X	118425492	118469573	0	0	0.450786	0	0	0	0	0	0	0	0	0	0	24.1554	0	0	0	0	0
ENSG00000251022	RP11-163O17.1		4	83814639	83822113	2.84518	1.11618	0	0	0	0	0	0.520463	0	0	0	0	0	0	18.2532	0	0	0	1.85891
ENSG00000236780	AC078941.1		2	67350489	67442451	0	1.93753	3.87787	0	11.6678	0	0	3.30596	0	0	0	0	0	0	0	0	0	0	3.76518
ENSG00000237638	AC007386.2		2	65128974	65132271	0	0	0.416605	0	0	0	0	0.386784	0	0	18.6822	0	0	1.16417	0	0	0	2.90786	0.988553
ENSG00000229715	EEF1DP3	eukaryotic translation elongation factor 1 delta pseudogene 3 [Source:HGNC Symbol;Acc:30486]	13	32420978	32527609	2.18189	2.69018	1.17311	0	0	0	0	0.301018	10.0577	0	0	0	0	3.11451	0	0	0	2.14337	2.8712
ENSG00000224397	RP11-290F20.3		20	48884023	48896332	0.545472	0.887708	0.404962	0	0	12.0391	0	0	0	0	0	0	0	0	0	0	0	0	10.634
ENSG00000228437	RP11-400N13.2		1	222139683	222158306	0	5.10816	2.4429	13.2216	0	0	0	1.96003	0	0	0	0	0	1.77535	0	0	0	0	0
ENSG00000247317	RP11-273G15.2	similar to hCG1994695 (LOC100133669), non-coding RNA [Source:RefSeq DNA;Acc:NR_026913]	8	144063155	144099854	1.09094	2.41101	1.6348	0	0	0	15.0811	0	0	0	0	0	0	1.67614	0	0	0	2.55178	0
ENSG00000256417	RP11-1038A11.3		12	5399646	5492819	3.30786	0.937051	0	0	0	0	0	1.69688	10.0577	0	0	0	0	0.964311	0	0	0	5.47457	1.996
ENSG00000255226	CTD-2210P24.3		11	45772374	45773422	0.545472	0	0.867391	0	0	0	0	6.49185	0	0	0	4.23431	0	2.6257	0	0	0	0	9.64182
ENSG00000253100	RP11-219J21.1		8	25543314	25545040	1.76867	0	0	0	0	0	0	0.722819	20.1155	0	0	0	0	1.73888	0	0	0	0	0
ENSG00000251045	CTC-321K16.4		5	134984273	134989624	0	2.16304	0.428473	0	0	0	0	3.82828	0	9.26836	0	0	0	3.42278	0	0	0	3.22735	1.92782
ENSG00000231680	AP003774.6		11	64161814	64163303	0	0	0	0	0	0	0	0.44827	0	0	0	0	0	1.86338	0	0	8.6253	0	13.3194
ENSG00000254367	RP11-211C9.1		8	8581203	8639989	0	0	10.2998	0	0	12.0391	0	1.82883	0	0	0	0	0	0	0	0	0	0	0
ENSG00000250387	RP11-136K7.2		5	70647682	70742169	0	0	0	0	0	0	15.0811	0.291113	0	0	0	0	7.80543	0.949559	0	0	0	0	0
ENSG00000253220	RP11-103H7.2		8	127510394	127512548	0	0	0.329139	13.2216	0	0	0	0.918987	0	0	0	0	0	0.964311	0	0	0	2.9228	5.76056
ENSG00000235953	AL353805.1		9	103115360	103156151	0	1.11618	0.416605	0	0	0	0	0.268018	0	0	0	0	0	5.01282	0	0	17.2506	0	0
ENSG00000250763	RP11-974F13.6		5	69274357	69293569	4.43742	2.82894	3.0805	0	0	0	0	1.90513	0	0	0	0	7.80543	0	0	0	0	2.14337	1.85891
ENSG00000253722	RP11-10N23.4		8	94745444	94746250	1.09094	1.27533	0.329139	0	0	0	0	0	0	0	0	0	0	2.08362	18.2532	0	0	0	0.98371
ENSG00000254287	RP11-44K6.4		8	39775595	39778409	12.4802	0	0.411165	0	0	0	0	0.990168	0	0	0	0	0	1.10866	0	0	0	0	8.99629
ENSG00000214934	CTD-2560E9.2		11	45168194	45236289	0	2.49654	0	0	0	0	0	3.02509	0	0	0	0	0	0.9764	0	0	8.6253	8.73851	0
ENSG00000233230	AC079807.2		2	48132817	48134949	1.09094	0	0	0	11.6678	0	0	0.480446	0	0	0	0	0	0.986028	0	0	8.6253	0	0.98371
ENSG00000204241	RP11-713P17.3		11	133902167	133916744	5.57254	2.13012	1.08942	0	0	0	0	2.86904	0	0	0	0	0	3.53144	0	0	8.6253	0	0
ENSG00000185186	NCRNA00313	non-protein coding RNA 313 [Source:HGNC Symbol;Acc:16416]	21	44881974	44899414	2.29971	0.887708	0	0	0	0	0	0.722819	0	0	0	0	7.80543	4.67631	0	0	0	6.43012	0.988553
ENSG00000241220	RP11-292E2.1		3	153074896	153091975	3.85333	0	1.39505	0	0	0	0	3.16514	10.0577	0	0	0	0	5.26669	0	0	0	0	0
ENSG00000242639	RP11-358L16.2		10	46088878	46090046	0	0	1.63275	0	0	0	0	1.36103	0	0	0	0	0	5.85524	0	0	8.6253	4.28675	1.92782
ENSG00000255689	RP11-136I14.5		11	115453015	115471057	2.66876	6.14717	4.49082	0	0	0	0	1.71682	0	0	0	0	0	0	0	0	0	4.69515	3.92956
ENSG00000204971	RP11-807H22.7		11	71874366	71920285	0	0	1.69675	0	0	0	15.0811	0.995272	0	0	0	0	0	0.949559	0	0	0	2.90786	1.98458
ENSG00000226585	RP4-765C7.1		1	178326311	178333230	1.09094	0	2.28931	13.2216	0	0	0	0.44827	0	0	0	0	0	4.32884	0	0	0	2.14337	0
ENSG00000250784	RP11-540D14.6		1	155108373	155109607	0	0	0	0	0	0	0	2.96955	0	0	0	9.83561	0	2.08506	0	0	8.6253	0	0
ENSG00000196421	NCRNA00176	non-protein coding RNA 176 [Source:HGNC Symbol;Acc:27655]	20	62665697	62671315	0	2.87092	0.333654	0	11.6678	0	0	0	0	0	0	0	0	0	0	0	8.6253	0	0
ENSG00000251383	RP11-542G1.3		4	76279286	76287776	0	2.07021	1.82795	0	0	0	0	1.20937	0	0	0	0	0	4.74739	0	13.6327	0	0	0
ENSG00000225879	RP3-495K2.3		6	169362705	169364436	0	2.5349	0.428473	0	0	0	0	1.16837	0	0	0	5.6013	0	2.82769	0	0	8.6253	2.20226	0
ENSG00000237372	RP11-316P17.2		9	92316566	92334585	3.7597	3.25423	1.45574	0	0	0	0	1.63239	0	0	0	0	0	9.05459	0	0	0	3.22735	1.00087
ENSG00000234646	RP4-753D10.3		20	23012179	23019873	3.30786	1.89858	6.97061	0	0	0	0	2.57405	0	0	0	0	0	0	0	0	8.6253	0	0
ENSG00000254434	CTD-2555I5.1		11	80032664	80038955	1.76867	0	0.660951	0	0	0	0	0.44827	0	9.26836	0	4.23431	0	3.09976	0	0	0	2.9228	0.972072
ENSG00000235245	RP11-122K13.12		10	135108691	135109481	0	1.93024	1.75492	0	0	0	0	0	0	0	18.6822	0	0	0	0	0	0	0	0.972072
ENSG00000236054	LL22NC03-104C7.1		22	32979286	32980190	0	4.27537	0.853862	13.2216	0	0	0	0	0	0	0	0	0	0	0	0	0	0	4.95771
ENSG00000226252	RP1-18D14.7		1	47691469	47696422	0	0.937051	0	0	0	0	0	0.336035	0	9.27833	0	0	0	12.7538	0	0	0	0	0
ENSG00000234677	RP11-285A18.2		10	125673090	125691113	0	0	4.61563	0	0	0	0	0	0	0	18.6822	0	0	0	0	0	0	0	0
ENSG00000230002	AC074008.4		2	73684230	73686609	0	0	4.58537	0	0	0	0	0	0	0	18.6822	0	0	0	0	0	0	0	0
ENSG00000229484	RP5-888M10.2		1	12587766	12588462	0	0	0.599131	0	0	0	0	1.70295	0	0	18.6822	0	0	2.2707	0	0	0	0	0
ENSG00000249862	AC016205.1		18	36786888	37380282	0	1.86817	5.5932	0	0	0	0	1.90009	10.0577	0	0	0	0	0.9764	0	0	0	0	2.84965
ENSG00000004142	POLDIP2	polymerase (DNA-directed), delta interacting protein 2 [Source:HGNC Symbol;Acc:23781]	17	26673659	26684545	0	0	1.3545	0	11.6678	0	0	0	0	0	0	0	0	1.57864	0	0	8.6253	0	0
ENSG00000231486	AC096579.7		2	89130700	89165653	0	3.7793	0.560116	0	0	0	0	0.525975	0	0	0	11.2026	0	0	0	0	0	2.20226	4.95074
ENSG00000085365	SCAMP1	secretory carrier membrane protein 1 [Source:HGNC Symbol;Acc:10563]	5	77656339	77776562	2.14904	1.03511	0	0	0	0	0	0	0	0	0	0	0	0.789322	18.2532	0	0	0	0.988553
ENSG00000237832	RP5-974N19.1		20	14914489	14916009	0	0.996159	2.39766	0	0	0	0	2.20694	0	0	0	0	15.6109	0	0	0	0	0	1.98942
ENSG00000205632	WI2-81516E3.1		22	49288729	49294198	2.18189	1.11618	1.96124	0	11.6678	0	0	1.49981	0	0	0	0	0	3.72675	0	0	0	0	1.01229
ENSG00000228141	AC105339.1	epididymal protein pseudogene (LOC338963), non-coding RNA [Source:RefSeq DNA;Acc:NR_034139]	15	83379223	83382778	3.7597	0	1.90499	0	0	0	0	1.82715	0	9.26836	0	0	0	5.40638	0	0	0	0	0.972072
ENSG00000244951	AL365502.1		9	140503038	140506038	2.69451	2.76181	0	13.2216	0	0	0	0	0	0	0	0	0	2.46546	0	0	0	0	1.96062
ENSG00000231131	RP11-346D6.6		10	54210637	54230293	0	2.32174	0	0	0	0	15.0811	1.45997	0	0	0	4.23431	0	0	0	0	0	0	0
ENSG00000224819	AC093843.1		2	221655798	221662613	0	1.2277	1.26811	0	0	0	0	1.50229	0	0	0	4.23431	0	4.30183	0	0	8.6253	0	1.92782
ENSG00000235643	RP1-69M21.2		1	11669588	11673412	0	0	0	0	0	0	0	4.82098	0	0	0	0	0	0	18.2532	0	0	0	0
ENSG00000226431	RP11-416N2.3		10	105308832	105310721	0.545472	1.41409	0	0	0	0	0	0	0	0	0	0	0	1.86338	18.2532	0	0	0	0.988553
ENSG00000223586	RP4-662A9.2		6	134142285	134172938	4.43742	0	2.66103	0	0	0	0	4.90568	10.0577	0	0	0	0	0.964311	0	0	0	0	0
ENSG00000231507	RP11-134P9.3		1	203256280	203257929	0	0	0	0	0	0	0	0.984001	20.1155	0	0	0	0	0.789322	0	0	0	0	1.00087
ENSG00000236455	AC005154.5		7	30624316	30625588	0	0.937715	1.27355	13.2216	0	0	0	0.291113	0	0	0	0	0	0.9764	0	0	0	3.22735	2.96026
ENSG00000231236	AP001604.3		21	28731204	28820898	0.545472	0	1.07212	0	0	0	0	0.641816	0	0	18.6822	0	0	1.92596	0	0	0	0	0
ENSG00000227704	RP1-266L20.4		6	170125600	170139088	3.93612	6.06788	0.329139	0	0	0	0	0.512448	0	0	0	4.23431	0	1.92862	0	0	0	2.90786	2.92526
ENSG00000231703	RP4-669H2.1		20	52014199	52017772	2.66876	4.68249	2.43779	0	0	0	0	2.16912	0	0	0	0	0	4.02646	0	0	0	5.81571	0.972072
ENSG00000204148	C9orf27	chromosome 9 open reading frame 27 [Source:HGNC Symbol;Acc:23367]	9	118650448	118687486	3.30786	0	0	0	0	0	0	0	10.0577	0	0	0	0	0	0	0	0	9.3903	0
ENSG00000254180	AB015752.3		8	91546839	91632298	5.07653	1.41409	2.34901	0	0	0	0	1.04041	0	0	0	0	7.80543	0.789322	0	0	0	3.22735	0.988553
ENSG00000237864	NCRNA00322	non-protein coding RNA 322 [Source:HGNC Symbol;Acc:33698]	21	44742297	44751919	2.14904	3.75796	0.631424	0	0	0	0	0.45502	0	0	0	0	15.6109	0	0	0	0	0	0
ENSG00000234810	RP11-466L17.1		1	56046710	56200675	2.18189	1.03511	2.26462	0	0	0	0	5.27467	0	0	0	0	0	0	0	0	8.6253	2.20226	1.01229
ENSG00000242042	RP11-690C23.2		1	246679341	246687589	0.545472	0.937715	0.442697	0	0	0	0	0	0	0	18.6822	0	0	0.986028	0	0	0	0	1.00087
ENSG00000225548	AC098973.2		3	27844253	27932792	0	0.934085	1.48888	0	0	0	0	0.992894	0	9.26836	0	0	0	1.10866	0	0	0	0	8.7714
ENSG00000242516	RP11-413E6.8		3	75721542	75728454	0	0.934085	5.55351	13.2216	0	0	0	2.82668	0	0	0	0	0	0	0	0	0	0	0
ENSG00000229140	RP11-3O20.1		8	130363937	130692485	2.84518	0.902423	0.853862	13.2216	0	0	0	0.907091	0	0	0	0	0	3.78987	0	0	0	0	0
ENSG00000255548	RP11-617B3.2		11	103816276	103817274	1.76867	2.18599	0	0	0	0	0	0	10.0577	0	0	0	8.43497	0	0	0	0	0	0
ENSG00000235872	RP11-335O4.3		12	68052771	68064699	0	0	0	0	0	0	0	3.59229	10.0577	0	0	0	7.80543	0.9764	0	0	0	0	0
ENSG00000238033	AC002480.2		7	22689579	22705152	0	0.902423	0.434489	0	0	0	0	2.40951	0	0	18.6822	0	0	0	0	0	0	0	0
ENSG00000253802	CTA-392C11.1		8	40156260	40200921	0	0	0.560116	13.2216	0	0	0	0.301018	0	0	0	5.6013	0	2.6527	0	0	0	0	0
ENSG00000234022	AC008278.2		2	15704294	15713992	1.76867	0.996159	4.70707	0	11.6678	0	0	1.42053	0	0	0	0	0	1.73888	0	0	0	0	0
ENSG00000227599	RP4-753D4.2		20	41597383	41600132	3.7597	0.996159	6.85695	0	0	0	0	0.31496	0	0	0	0	0	3.72884	0	0	0	4.69515	1.92782
ENSG00000236423	RP13-15E13.1	similar to hCG1815312 (LOC100133612), non-coding RNA [Source:RefSeq DNA;Acc:NR_024455]	1	3816936	3833789	5.38902	3.4927	0	0	0	0	0	0	0	0	0	0	0	7.13516	0	0	0	4.28675	1.93671
ENSG00000232628	RP11-365O16.3		1	224396449	224400981	2.66876	0	0.839451	0	0	0	0	2.60998	10.0577	0	0	0	0	0	0	0	0	5.05123	1.01229
ENSG00000235399	RP11-204P2.3		6	137316307	137320641	0	1.41409	3.32463	0	0	0	0	2.39509	0	9.27833	0	0	0	1.86338	0	0	0	2.9228	1.01229
ENSG00000223715	RP11-71G7.1		3	176321931	176353320	10.9819	0	2.90734	0	0	0	0	0.722819	0	0	0	0	0	0.9764	0	0	0	0	6.59513
ENSG00000226496	NCRNA00323	non-protein coding RNA 323 [Source:HGNC Symbol;Acc:19720]	21	42513427	42520060	3.30786	1.93753	2.3322	0	0	0	0	0.6753	10.0577	0	0	0	0	0	0	0	0	0	3.85564
ENSG00000254101	RP11-30J20.1		8	137543041	137997178	0	2.47597	0.827771	0	0	0	0	0.704159	0	0	0	11.2026	0	3.72675	0	0	0	3.22735	0
ENSG00000229276	RP5-1112D6.5		6	111681844	111682810	0	0	0	0	0	0	0	8.22214	0	0	0	0	0	0.986028	0	0	8.6253	2.20226	1.98819
ENSG00000254339	RP11-267L5.1		8	115294296	115308068	0	1.28663	19.2544	0	0	0	0	0.469706	0	0	0	0	0	0	0	0	0	0	0.972072
ENSG00000234018	AL121578.2		X	37765400	37808658	0	0	0.745744	0	0	0	0	1.53658	0	0	18.6822	0	0	0	0	0	0	0	0.98371
ENSG00000248717	RP11-451H23.3		5	180111766	180113546	0	4.46797	0	0	11.6678	0	0	0	0	0	0	0	0	0	0	0	0	0	5.81013
ENSG00000251442	RP11-792D21.2		4	79567057	79603853	2.66876	0	0	0	0	0	0	0	0	0	0	0	0	0	18.2532	0	0	0	0.988553
ENSG00000179859	AC025335.1		17	7816658	7819589	3.39065	7.44039	1.29422	0	0	0	0	1.61201	0	0	0	0	0	4.34367	0	0	0	0	3.82194
ENSG00000249007	RP11-510N19.5		1	201980498	201984785	0.545472	11.6483	0	0	0	0	0	0.924726	0	0	0	0	0	0	0	0	0	8.76839	0
ENSG00000242557	RP11-316M1.11		1	151031995	151042801	4.44875	1.84014	1.59105	0	0	0	0	1.46129	0	0	0	0	0	3.83543	0	0	0	2.14337	6.53888
ENSG00000233536	RP11-867G2.5		11	94371204	94373999	2.29971	1.2277	2.71431	0	0	0	0	0	0	0	0	0	15.6109	0	0	0	0	0	0
ENSG00000215196	AC091878.1		5	17130137	17217508	0	0	0.786578	0	0	0	0	0	10.0577	0	0	4.23431	0	0	0	0	0	0	6.74176
ENSG00000230105	RP11-431N15.2		X	56644824	56650891	0	0	0	0	0	0	0	0	0	0	18.6822	0	0	1.2943	0	0	0	0	1.83736
ENSG00000233429	HOTAIRM1	HOXA transcript antisense RNA, myeloid-specific 1 (non-protein coding) [Source:HGNC Symbol;Acc:37117]	7	27135266	27139773	0	12.0668	0	0	0	0	0	0	0	0	0	0	0	0	0	0	0	9.74638	0
ENSG00000251126	RP11-119H12.6		4	113801616	113803486	0.545472	0	0	0	0	0	0	0.268018	0	9.26836	0	0	0	1.16417	0	0	8.6253	0	1.92782
ENSG00000249352	RP11-141O11.2		5	68266519	68325992	2.29971	0.887708	0.599131	0	0	0	0	4.06698	10.0577	0	0	0	0	0	0	0	0	2.90786	0.972072
ENSG00000227555	RP11-406A20.4		9	92782936	92803781	0.545472	0.937051	4.51997	0	0	0	0	1.27344	0	0	0	5.6013	0	1.89798	0	0	0	0	6.97809
ENSG00000247207	AC020928.2		19	37288420	37319003	2.84518	1.24827	0.329139	0	0	0	0	2.577	0	0	0	4.23431	7.80543	2.68844	0	0	0	0	0
ENSG00000237976	RP11-126K1.6		1	151319443	151320503	0	1.11618	4.02649	13.2216	0	0	0	0.44827	0	0	0	0	0	0	0	0	0	0	2.90878
ENSG00000229495	RP11-173D14.3		6	79519432	79523020	0	5.84088	0.442697	0	0	0	0	0.746133	0	0	0	0	7.80543	0	0	0	0	6.83852	0
ENSG00000243368	RP11-786O7.1		3	182734043	182735420	1.76867	0	0	0	0	0	0	0.507833	10.0577	0	0	0	0	1.67614	0	0	0	0	7.59961
ENSG00000188525	AC010969.1		2	10143286	10146158	1.63641	1.28663	3.04276	0	0	0	0	0.317376	0	0	0	0	0	1.67614	0	13.6327	0	0	0
ENSG00000172965	AC068491.1	non-protein coding RNA 152 (NCRNA00152), transcript variant 2, non-coding RNA [Source:RefSeq DNA;Acc:NR_024205]	2	111965353	112252677	0	0	0.434489	0	0	0	0	0.525975	10.0577	0	0	0	0	9.57943	0	0	0	0	0.988553
ENSG00000251371	CTD-2318H23.1		5	4640844	4648367	0	2.49654	0.442697	0	0	0	0	1.2718	10.0577	0	0	0	0	5.30038	0	0	0	0	1.98819
ENSG00000247903	RP11-421F16.3		12	27124519	27132515	2.29971	0	0	0	11.6678	0	0	7.5732	0	0	0	0	0	0	0	0	0	0	0
ENSG00000231877	RP11-177F15.1		1	238648745	238701605	0	1.27533	0	13.2216	0	0	0	0.853412	0	0	0	4.23431	0	0.9764	0	0	0	0	0.972072
ENSG00000231023	RP11-314E23.1		6	133409219	133427717	0	0	2.34034	0	0	0	0	8.13224	10.0577	0	0	0	0	0.986028	0	0	0	0	0
ENSG00000250155	CTD-2353F22.1		5	36666316	36725297	0	0	0	0	0	0	0	1.40058	20.1155	0	0	0	0	0	0	0	0	0	0
ENSG00000248243	RP11-93K22.13		3	129808276	129813147	0	0	0	0	0	0	0	1.83744	0	0	18.6822	0	0	0.964311	0	0	0	0	0
ENSG00000228877	RP11-473E2.4		9	137419028	137437090	1.76867	0	0.329139	13.2216	0	0	0	0	0	0	0	0	0	2.97204	0	0	0	2.20226	0.988553
ENSG00000251443	RP11-113I22.1		5	33229841	33255659	0	1.28663	2.60916	0	11.6678	0	0	1.07532	0	0	0	0	0	0.949559	0	0	0	2.90786	0.972072
ENSG00000244945	RP11-1379J22.2		5	179022905	179030742	0	0.937051	0.669159	0	0	0	15.0811	2.50343	0	0	0	0	0	2.24386	0	0	0	0	0
ENSG00000160695	VPS11	vacuolar protein sorting 11 homolog (S. cerevisiae) [Source:HGNC Symbol;Acc:14583]	11	118938403	118952688	5.33752	1.2277	0	0	0	0	0	0.268018	0	0	0	4.23431	7.80543	0	0	0	0	2.55178	0
ENSG00000255234	RP11-727A23.10		11	82997171	83134559	4.96847	0.934085	8.73855	0	0	0	0	0.978059	0	0	0	0	0	2.83978	0	0	0	0	2.92526
ENSG00000247547	AC011508.1		19	44326226	44331358	0	0	0.329139	0	0	0	0	0.45502	10.0577	0	0	5.6013	0	2.97043	0	0	0	0	1.92782
ENSG00000246979	AC009108.1		16	86508135	86542466	2.29971	1.24827	2.60168	0	0	0	0	3.96827	0	0	0	0	7.80543	3.37936	0	0	0	0	0
ENSG00000237159	RP11-296L22.4		9	34568013	34582827	0.545472	0.902423	0	0	0	0	0	0.973269	0	0	0	0	0	4.3383	0	0	8.6253	0	5.89593
ENSG00000255825	RP5-1154L15.1		12	699799	700435	3.30786	2.87026	0	0	0	0	15.0811	0	0	0	0	0	0	0	0	0	0	0	0
ENSG00000234076	RP11-297K7.2		3	188659504	188665428	1.76867	0	1.33004	13.2216	0	0	0	0.789023	0	0	0	0	0	0	0	0	0	2.20226	1.93671
ENSG00000248220	AL161940.1		20	59205912	59228954	0.545472	0	1.21291	0	0	0	0	0	0	0	0	0	15.6109	0.949559	0	0	0	0	2.92785
ENSG00000203900	RP11-261N11.8		20	61991340	62002529	0	1.24827	0	0	0	0	0	0	0	0	18.6822	0	0	1.2943	0	0	0	0	0
ENSG00000235314	AC017116.8		7	44078770	44081905	4.94428	0.937051	0	13.2216	0	0	0	0	0	0	0	0	0	2.08362	0	0	0	0	0
ENSG00000249409	RP11-501E14.1		4	121560245	121571951	0	7.77185	0	0	0	0	0	0.455747	0	0	0	0	0	0	0	0	0	2.14337	10.8148
ENSG00000251020	RP1-50O24.8		1	27218269	27219052	0	5.10371	1.0661	0	0	12.0391	0	0.789023	0	0	0	0	0	2.14057	0	0	0	0	0
ENSG00000237574	AC079776.3		2	130680750	130704276	2.84518	1.41409	0.809924	0	11.6678	0	0	2.43591	0	0	0	0	0	0	0	0	0	0	1.94414
ENSG00000237401	AC107070.1		2	4005245	4021660	4.06837	1.11618	3.73016	0	0	0	0	0	0	9.27833	0	0	0	0	0	0	0	2.90786	0
ENSG00000225929	AC000036.4		22	51174253	51176567	2.66876	0	1.88219	0	0	0	15.0811	0.31496	0	0	0	0	0	0	0	0	0	0	1.01229
ENSG00000246548	AC007686.1		14	77507407	77535846	0	0	0.416605	0	0	0	0	0	0	0	18.6822	0	0	0	0	0	0	0	1.85891
ENSG00000243810	RP5-1096J16.1		20	20239051	20248453	3.23998	0	0.226462	0	0	0	0	0.765929	0	0	0	5.6013	8.43497	2.6527	0	0	0	0	0
ENSG00000240875	RP11-392A22.2		3	156465135	156534851	2.29971	0	0	0	0	0	0	1.81738	10.0577	0	0	5.6013	0	1.10866	0	0	0	0	0
ENSG00000236828	RP5-1145L23.2		X	32773057	32774517	2.29971	0	0.78444	0	11.6678	0	0	0	0	0	0	0	0	1.86338	0	0	0	3.22735	1.00087
ENSG00000254269	CTD-2281E23.2		8	1054882	1212580	4.39881	0	1.03362	0	0	0	0	0.455747	0	0	0	0	0	1.2943	0	13.6327	0	0	0
ENSG00000249143	AC005908.1		12	3592880	3601975	0.545472	0	0.428473	0	0	0	0	0	0	0	0	0	0	6.09464	0	13.6327	0	0	0
ENSG00000224074	AC098971.2		3	24137760	24144738	5.88299	8.15448	0	0	0	0	0	1.97876	0	0	0	0	0	3.69434	0	0	0	0	0.988553
ENSG00000227925	RP11-191N8.2		1	222001008	222014008	0	0	0.452924	0	0	0	0	0	20.1155	0	0	0	0	0	0	0	0	0	0
ENSG00000224077	AP000936.4		11	116969703	116978886	1.09094	0	1.19826	0	0	0	0	0.867645	0	0	0	0	7.80543	0	0	0	8.6253	0	0.972072
ENSG00000237413	RP11-183M13.1		1	78695283	78835149	0.545472	2.23235	0	0	0	0	0	2.18889	0	0	0	0	0	0.9764	0	13.6327	0	0	0.98371
ENSG00000229852	RP11-398K22.12		6	73972938	74011124	11.8175	1.03511	1.28069	0	0	0	0	0.968732	0	0	0	0	0	3.24464	0	0	0	2.14337	0
ENSG00000242048	RP13-452N2.1		7	151503744	151507558	0	0.996159	0.428473	0	11.6678	0	0	0	0	0	0	4.23431	0	1.16417	0	0	0	0	1.98436
ENSG00000185065	AC000068.5		22	19435416	19437628	0.545472	1.8741	3.80982	0	0	0	0	0.45502	0	9.27833	0	0	0	2.45847	0	0	0	0	1.98942
ENSG00000249710	RP11-588P8.1		4	101111190	101136662	2.14904	0	1.85175	0	0	0	0	1.16469	10.0577	0	0	0	0	2.58859	0	0	0	2.55178	0
ENSG00000239454	RP11-508O18.1		3	74048956	74054760	0	0	0.884739	0	0	0	0	0.336035	0	0	0	9.83561	0	8.24283	0	0	0	0	0.98371
ENSG00000227646	AC002064.3		7	89511667	89840949	0	6.53776	1.62558	0	0	0	0	0.326856	0	0	0	0	0	0.789322	0	0	0	3.22735	7.7366
ENSG00000225278	BX571672.5		1	143211528	143275032	0.545472	0	5.51131	0	0	0	0	2.37463	10.0577	0	0	0	0	1.75363	0	0	0	0	0
ENSG00000204018	RP11-543D5.3	UPF0632 protein A (LOC388630), mRNA [Source:RefSeq DNA;Acc:NM_001194986]	1	48231308	48267295	4.59941	0.934085	6.25181	0	0	0	0	0	0	0	0	0	8.43497	0	0	0	0	0	0
ENSG00000237435	RP11-147C23.1		1	96403457	96488436	0	0.902423	2.20635	0	0	0	0	0	0	9.27833	0	0	7.80543	0	0	0	0	0	0
ENSG00000248429	RP11-597D13.9		4	159091904	159124029	0	0	1.72339	0	0	0	0	0.690221	0	0	0	4.23431	0	3.8942	0	0	8.6253	0	0.988553
ENSG00000223799	AP000295.7		21	34636178	34638565	0	1.93387	1.08221	0	0	0	0	2.33642	0	0	0	0	0	0	0	0	0	5.84559	8.95101
ENSG00000226272	AC008533.1		5	142239169	142248487	0	0	0	0	0	0	0	0	20.1155	0	0	0	0	0	0	0	0	0	0
ENSG00000234572	AC007880.1		2	65073264	65090760	0	0	0.816127	0	11.6678	0	0	1.41746	0	0	0	0	0	0	0	0	0	4.28675	1.85891
ENSG00000240602	RP11-64D22.2	arylacetamide deacetylase (esterase) pseudogene (LOC201651), non-coding RNA [Source:RefSeq DNA;Acc:NR_026915]	3	151488216	151502682	0	0	0	0	0	0	0	10.4553	0	0	0	0	0	0.964311	0	0	8.6253	0	0
ENSG00000250658	RP11-138B4.1		4	188225237	188230836	6.94241	0	0.599131	0	0	0	0	1.46394	0	0	0	0	0	0	0	0	0	0	10.9223
ENSG00000234551	RP11-123H22.1		13	104077550	104080035	0	7.09035	0	0	11.6678	0	0	1.14891	0	0	0	0	0	0	0	0	0	0	0
ENSG00000235423	RP11-282O18.3		12	123736575	123746030	2.29971	2.4492	0.660951	0	0	0	0	1.99262	10.0577	0	0	0	0	2.40296	0	0	0	0	0
ENSG00000233183	RP3-468B3.2		6	33861100	33895408	0	0	0.226462	0	0	0	0	0.268018	0	0	0	0	0	1.10866	18.2532	0	0	0	0
ENSG00000250846	RP11-807H7.1		4	66535679	66563747	0.545472	0	0	0	0	0	0	0.301018	0	0	0	4.23431	0	2.83978	0	0	8.6253	3.22735	0
ENSG00000234177	AC068057.2		2	105363096	105374177	1.09094	0	0	0	0	0	0	0	0	0	18.6822	0	0	0	0	0	0	0	0
ENSG00000248279	CTD-2218G20.2		5	32947549	32962573	3.30786	0	0.442697	0	0	0	0	3.49089	0	0	0	0	0	0.949559	0	0	8.6253	0	2.94011
ENSG00000229463	RP4-580N22.1		1	236002783	236003482	0	0	1.72339	0	0	0	0	0.469706	10.0577	0	0	0	0	2.75175	0	0	0	0	4.73011
ENSG00000254278	RP11-278I4.2		8	120075181	120081021	0	0	0.450786	0	0	0	0	0.975483	0	0	0	18.3042	0	0	0	0	0	0	0
ENSG00000223907	RP11-439L8.4		1	31984036	31989846	0	0	1.14527	0	11.6678	0	0	2.13296	0	0	0	0	0	2.76138	0	0	0	0	1.98819
ENSG00000225744	AC017002.4		2	112365418	112370095	0.545472	2.05323	0.861951	0	0	0	0	1.02882	10.0577	0	0	0	0	2.21732	0	0	0	2.9228	0
ENSG00000237796	RP11-789G22.2		13	95954705	95956401	6.61573	0	0.404962	0	0	0	0	1.47525	10.0577	0	0	0	0	1.10866	0	0	0	0	0
ENSG00000233098	AC090774.1		17	20771810	20901341	0.545472	1.80485	1.54807	0	0	0	0	1.95372	10.0577	0	0	0	0	0.789322	0	0	0	2.9228	0
ENSG00000234389	AC007278.3		2	103055173	103056935	0	0	0.411165	0	0	0	0	1.93035	0	0	0	0	0	0	0	0	17.2506	0	0
ENSG00000246334	RP11-1334A24.4		5	176865504	176874700	0.545472	0	1.34004	0	0	0	0	0	0	0	0	4.23431	7.80543	0.949559	0	0	0	0	4.70637
ENSG00000251257	CTD-2263F21.1		5	38461029	38468441	1.76867	1.24827	0.450786	0	0	0	0	0.480446	0	0	0	0	0	0	0	13.6327	0	0	1.98436
ENSG00000236950	RP5-1051D14.1		1	209145799	209148652	0	0	0	0	0	0	0	0	0	0	0	0	0	0	0	0	0	2.90786	16.6261
ENSG00000230896	RP11-767N6.7		1	46160356	46162747	0	0	0	0	0	12.0391	0	5.28857	0	0	0	0	0	0	0	0	0	2.20226	0
ENSG00000239213	RP11-85F14.5		3	136560568	136580896	0	0.937051	0.87117	0	0	0	0	0.291113	0	0	0	0	7.80543	1.86338	0	0	0	0	7.74409
ENSG00000233009	RP11-430M15.1		13	101360579	101711638	0	5.86212	2.56296	0	0	0	0	0.776372	0	9.27833	0	0	0	0.9764	0	0	0	0	0
ENSG00000235262	RP11-258C19.6		X	53241590	53243861	0	2.20941	0.226462	13.2216	0	0	0	2.0426	0	0	0	0	0	1.67614	0	0	0	0	0
ENSG00000203356	RP11-296A18.3		1	51660767	51700768	0	0	0.750259	0	0	0	0	0.507833	0	0	0	5.6013	0	0	0	0	8.6253	0	3.85975
ENSG00000242671	RP11-232M24.1		3	146639710	146643005	4.29808	2.27149	2.89164	0	0	0	0	0.525975	0	0	0	5.6013	0	3.73436	0	0	0	0	0
ENSG00000235741	RP5-866L20.1		1	54982085	54982932	0	0	0	0	0	0	0	0	0	0	0	0	0	0	0	13.6327	0	0	5.65453
ENSG00000230310	CTD-2192J16.11		19	12663411	12664458	2.66876	2.5349	1.54842	0	0	0	0	1.06748	0	0	0	0	0	2.83978	0	0	8.6253	0	0
ENSG00000256341	RP11-21A7A.3		11	63885744	63886682	0.545472	4.6379	0	0	0	0	0	0	0	0	0	0	0	0	0	0	8.6253	5.47457	0
ENSG00000255227	RP11-460B17.2		11	29467034	29478940	0	2.03127	0.762127	0	11.6678	0	0	0	0	0	0	0	0	1.91387	0	0	0	2.90786	0
ENSG00000256256	RP11-443N24.4		12	26035888	26038788	2.29971	7.49355	0	0	0	0	0	3.43682	0	0	0	0	0	2.09469	0	0	0	2.9228	0.972072
ENSG00000240288	GHRLOS	ghrelin opposite strand RNA (non-protein coding) [Source:HGNC Symbol;Acc:33885]	3	10327472	10334334	0	1.87477	0	13.2216	0	0	0	0.336035	0	0	0	0	0	0	0	0	0	0	3.78673
ENSG00000248605	CTD-2306M5.1		5	25404842	25446034	0	3.1592	0.226462	0	0	0	0	1.59067	10.0577	0	0	0	0	1.2943	0	0	0	0	2.8712
ENSG00000228639	AC005152.3		17	70017992	70030233	0.545472	0.902423	0.411165	0	11.6678	0	0	3.61354	0	0	0	0	0	0.9764	0	0	0	0	0.988553
ENSG00000231426	RP5-899B16.1		6	140175987	140181288	2.29971	0	0	0	0	12.0391	0	0.336035	0	0	0	0	0	4.41842	0	0	0	0	0
ENSG00000248858	RP11-100L22.2		8	93711970	93891730	0	1.41409	0.450786	0	0	0	0	0.469706	10.0577	0	0	0	0	0	0	0	0	6.60677	0
ENSG00000248540	AC010931.2		15	74418714	74421619	4.84355	0.902423	0	13.2216	0	0	0	0	0	0	0	0	0	0	0	0	0	0	0
ENSG00000232455	RP11-107O13.1		3	45525466	45551037	0	0	3.02126	0	0	0	0	1.59152	0	9.27833	0	0	0	1.10866	0	0	0	0	3.91601
ENSG00000236318	AC019117.1		7	17414491	17506288	2.72736	0	0.662793	0	0	0	0	5.85036	0	0	0	0	0	7.49646	0	0	0	2.14337	0
ENSG00000232190	AC106745.1		16	87091390	87097597	0	0	0.416605	0	11.6678	0	0	1.74362	0	0	0	0	0	4.89093	0	0	0	0	0
ENSG00000232821	AC003986.6		7	19152097	19153894	0	0	0	0	0	0	0	0.44827	0	0	0	0	0	0	18.2532	0	0	0	0
ENSG00000245017	RP11-181C3.1		12	98879322	98897633	0	0	0	0	0	0	0	1.35535	10.0577	0	0	5.6013	0	1.67614	0	0	0	0	0
ENSG00000228108	AC092839.3		2	54743185	54767834	0	0	0	0	0	0	0	0.317376	0	0	0	0	7.80543	0	0	0	0	0	10.5595
ENSG00000250533	RP11-1018N14.5		17	49517014	49523163	0	1.03511	5.02482	0	0	0	0	0.797822	0	0	0	0	0	0	0	0	0	8.9819	2.83098
ENSG00000223891	RP5-995J12.2		20	42839600	42854667	0	0	0.434489	13.2216	0	0	0	0	0	0	0	0	0	1.10866	0	0	0	2.9228	0.972072
ENSG00000225730	RP3-365O12.2		6	46871208	46876815	2.66876	2.35181	2.31132	0	0	0	0	1.13255	0	0	0	0	0	5.31494	0	0	0	0	4.8442
ENSG00000229205	NCRNA00200	non-protein coding RNA 200 [Source:HGNC Symbol;Acc:30974]	10	1205708	1210612	9.52309	0	0.450786	0	0	0	0	0.480446	0	0	0	0	0	3.84946	0	0	0	4.28675	0
ENSG00000231324	AP000696.2		21	38004979	38009331	2.29971	1.27533	0.404962	0	11.6678	0	0	0	0	0	0	0	0	0	0	0	0	2.9228	0
ENSG00000226921	RP11-199F6.5		13	114581673	114586528	2.66876	0.902423	1.98923	0	0	0	0	0.904681	0	0	0	0	0	3.06215	0	0	0	9.04306	0
ENSG00000229967	RP11-366F6.2		X	151072903	151082440	0	0	0	0	0	0	0	0	10.0577	0	0	8.46862	0	0	0	0	0	0	0
ENSG00000232825	RP5-896L10.1		1	99469832	99614408	0	0	0	0	0	0	0	1.45985	0	0	0	0	8.43497	0.964311	0	0	0	0	7.65863
ENSG00000255013	RP11-1167A19.14		11	65820615	65820699	0	4.2638	0	0	0	0	0	0	10.0577	0	0	0	0	0	0	0	0	2.14337	1.97711
ENSG00000232298	RP11-10N16.3		1	24620477	24648420	5.97662	0	0	0	11.6678	0	0	0	0	0	0	0	0	0.789322	0	0	0	0	0
ENSG00000253263	KB-1507C5.3		8	103904104	103905836	0	1.41485	0.857886	13.2216	0	0	0	0	0	0	0	0	0	0.789322	0	0	0	2.14337	0
ENSG00000232077	RP11-452J13.1		1	193273875	193335083	0	0	3.09624	0	0	0	0	0.896539	0	0	0	0	0	0.789322	0	13.6327	0	0	0
ENSG00000248408	RP11-452C8.1		4	80584915	80617991	0	0	0.226462	0	0	0	0	1.57956	0	0	0	0	0	4.79327	0	0	8.6253	2.14337	0.98371
ENSG00000256364	RP11-173P15.3		12	121134927	121137344	0	0.937051	4.49331	0	0	0	0	2.3489	0	0	0	0	0	0.949559	0	0	8.6253	0	0.972072
ENSG00000253115	RP11-6I2.4		8	75015751	75018979	0.545472	5.16985	1.4536	0	0	0	0	0.298609	0	9.26836	0	0	0	1.57864	0	0	0	0	0
ENSG00000237646	AP000699.2		21	38176285	38178585	8.87485	1.87543	0.452924	0	0	0	0	1.27046	0	0	0	0	0	2.94846	0	0	0	0	2.8712
ENSG00000249451	RP11-94C24.6		17	48580773	48585689	1.76867	2.15069	0	0	0	0	0	1.46967	0	0	0	0	0	0	0	0	0	5.06617	7.75224
ENSG00000226944	RP1-120G22.11		1	6264900	6265840	1.76867	0	0.428473	0	0	0	0	0.508353	0	0	0	0	7.80543	7.65346	0	0	0	0	0
ENSG00000248253	AC022389.1		10	85926988	85931832	0	1.27533	2.13601	0	11.6678	0	0	0.889339	0	0	0	0	0	0	0	0	0	2.14337	0
ENSG00000228271	RP11-513G11.2		3	193994471	194005157	0	1.86817	0	13.2216	0	0	0	2.93164	0	0	0	0	0	0	0	0	0	0	0
ENSG00000229425	AJ006998.2		21	16742841	16774624	0	3.6235	2.36173	0	0	0	0	0.6753	10.0577	0	0	0	0	1.2943	0	0	0	0	0
ENSG00000224307	RP11-344B5.2		9	132044737	132048007	0	0	0.861951	0	0	0	0	0.928528	0	0	0	0	0	1.86338	0	0	0	0	14.3361
ENSG00000104725	NEFL	neurofilament, light polypeptide [Source:HGNC Symbol;Acc:7739]	8	24808468	24814624	0	1.41485	0.845655	0	0	0	0	2.0656	0	0	0	0	0	0	0	13.6327	0	0	0
ENSG00000224832	AP000469.2		21	25676863	25693690	0	0	1.70974	0	0	0	0	0.779055	0	0	0	0	0	2.94846	0	0	8.6253	0	3.87197
ENSG00000224924	NCRNA00320	non-protein coding RNA 320 [Source:HGNC Symbol;Acc:19690]	21	22114908	22175426	0	0	0.859302	13.2216	0	0	0	2.07744	0	0	0	0	0	1.75363	0	0	0	0	0
ENSG00000254321	RP11-495O10.1		8	38558144	38562373	4.84355	0	1.38789	0	0	0	0	0	0	0	0	0	0	6.71784	0	0	0	2.9228	1.98819
ENSG00000250634	RP11-341G5.1		4	13656803	13978699	0.545472	1.83947	2.11602	0	0	0	0	1.30894	10.0577	0	0	0	0	0	0	0	0	0	1.98942
ENSG00000249241	AC195454.1		4	40318502	40332436	0	0	0.599131	0	0	0	0	13.4575	0	0	0	0	0	2.7848	0	0	0	0	1.00087
ENSG00000177133	RP1-163G9.1		1	2976179	2985001	0.545472	3.62426	2.13324	0	0	0	0	0.301018	0	0	0	0	0	1.86338	0	0	0	7.5141	1.85891
ENSG00000256164	RP11-264F23.3		12	4357931	4385350	1.09094	2.22435	1.51068	0	0	0	0	2.25005	0	0	0	0	0	1.16417	0	0	8.6253	0	0.972072
ENSG00000231532	AC022311.1		2	4675812	4703805	0.545472	0	1.26644	0	0	0	0	3.16393	0	0	0	0	7.80543	3.15767	0	0	0	0	1.83736
ENSG00000224127	RP11-510C10.2		1	75593515	75598743	0.545472	2.23235	2.11812	0	0	0	0	0.525975	0	0	0	0	8.43497	3.8942	0	0	0	0	0
ENSG00000246228	RP11-382A18.1		8	128302062	128494384	0	6.11747	0.416605	0	0	0	0	9.2227	0	0	0	0	0	0	0	0	0	0	1.96062
ENSG00000248103	CTC-338M12.9		5	180708376	180710653	0	0.937715	0.404962	0	0	0	0	3.45209	0	0	0	4.23431	0	0	0	0	0	0	8.59211
ENSG00000225064	AC007879.6		2	208125169	208135414	0	0	0	0	0	0	0	4.11	0	9.27833	0	0	0	1.2943	0	0	0	2.9228	0
ENSG00000203321	RP11-197P3.4		9	77567884	77611209	0	0	0	0	0	0	0	8.15794	0	0	0	0	0	0.789322	0	0	8.6253	0	0
ENSG00000235271	RP1-90L6.3		22	27299255	27316574	5.68637	3.39955	1.33004	0	0	0	0	7.13682	0	0	0	0	0	0	0	0	0	0	0
ENSG00000226702	AC011306.2		2	56190326	56274461	4.30517	0	0.667308	0	0	0	0	1.43741	0	0	0	0	0	11.1006	0	0	0	0	0
ENSG00000240893	RP11-147G7.3		3	112455294	112468166	0	1.03511	0	13.2216	0	0	0	0.685392	0	0	0	0	0	0	0	0	0	2.55178	0
ENSG00000226155	AC124944.3		3	195638920	195640857	0.545472	2.88003	0.333654	0	0	0	0	1.1528	0	0	0	0	7.80543	0.949559	0	0	0	0	3.81469
ENSG00000250541	RP11-302F12.10		4	25771888	25775199	0	0.902423	0.599131	0	0	0	0	2.66328	10.0577	0	0	0	0	3.25886	0	0	0	0	0
ENSG00000237017	AC012314.8		19	54622891	54628722	3.85333	0	0	0	0	0	0	3.64477	0	0	0	0	0	3.38149	0	0	0	0	6.5776
ENSG00000246129	CR392000.2		9	139155771	139159083	0	0	8.5158	0	0	0	0	0	0	0	0	0	0	4.83541	0	0	0	2.14337	1.96062
ENSG00000246013	NCRNA00282	non-protein coding RNA 282 [Source:HGNC Symbol;Acc:26737]	13	52387483	52419286	3.30786	0	0.333654	0	0	0	0	0	0	0	0	0	8.43497	5.37499	0	0	0	0	0
ENSG00000240710	RP11-430C7.4		1	204572163	204585693	2.29971	0	1.00281	0	0	0	0	0.497911	0	0	0	4.23431	7.80543	1.57864	0	0	0	0	0
ENSG00000233200	RP11-324I22.2		10	35508822	35519526	0	0	0	13.2216	0	0	0	3.36438	0	0	0	0	0	0.789322	0	0	0	0	0
ENSG00000250880	RP11-185E12.2		5	93070508	93076829	0	0	1.50336	0	11.6678	0	0	0	0	0	0	0	0	0.964311	0	0	0	3.22735	0
ENSG00000223587	AY269186.1		3	65431	66175	0	0	1.31375	0	0	0	0	1.10168	0	0	0	4.23431	7.80543	1.91387	0	0	0	0	0.98371
ENSG00000230848	RP11-379C10.1		9	130801414	130819641	0	0	0	0	0	0	0	0	0	0	0	0	0	0	0	0	17.2506	0	0
ENSG00000249717	RP11-44F21.3		4	75881184	75895572	0	0	3.35485	0	0	0	0	0	0	0	0	4.23431	0	0	0	0	8.6253	0	0.972072
ENSG00000230479	AP000695.6		21	37802658	37853368	0	0	0	0	0	0	0	0.800951	0	0	0	5.6013	0	0	0	0	8.6253	2.14337	0
ENSG00000234425	RP11-528G1.2		1	160506863	160541248	0	0	1.07212	0	0	0	0	0.739382	0	0	0	0	0	2.21732	0	0	8.6253	2.55178	1.93671
ENSG00000236526	RP4-742J24.2		20	11890052	11899325	11.3399	3.74202	0	0	0	0	0	0.291113	0	0	0	0	0	1.76572	0	0	0	0	0
ENSG00000229832	RP11-384C4.2		1	212530760	212531695	0	4.06009	1.07847	0	0	0	0	0.301018	0	0	0	9.83561	0	0	0	0	0	0	1.83736
ENSG00000243628	RP11-18I14.7		10	104221152	104230846	1.09094	0	0.450786	0	0	0	0	0.386784	10.0577	0	0	0	0	1.2943	0	0	0	0	3.83185
ENSG00000250334	RP11-234K19.2		4	80413570	80497614	0	0	0	0	0	0	0	0	0	0	0	4.23431	0	1.2943	0	0	8.6253	2.9228	0
ENSG00000250692	CTB-35F21.4		5	139227875	139235974	0	0.902423	0.738616	0	0	0	0	5.82543	0	0	0	0	0	0	0	0	8.6253	0	0.972072
ENSG00000229334	AC046143.3		3	194353652	194366130	0	0	1.63225	0	0	0	0	1.76558	0	0	0	0	0	0	0	13.6327	0	0	0
ENSG00000251173	RP11-124A7.2		4	41222091	41258744	0	0	0.404962	0	0	0	0	0.678325	0	0	0	14.0699	0	1.86338	0	0	0	0	0
ENSG00000253406	AC012613.2		5	148596086	148656368	1.63641	0.934085	0.329139	0	0	0	0	0.594875	0	0	0	0	0	4.87708	0	0	8.6253	0	0
ENSG00000248362	CTC-327F10.5		5	147265649	147266441	0	0	0.411165	0	0	0	0	5.08896	0	0	0	0	8.43497	1.16417	0	0	0	0	1.85891
ENSG00000223692	AP000337.3		21	47882384	47889219	5.07653	0	0	0	0	0	0	1.87163	0	0	0	0	7.80543	0	0	0	0	2.20226	0
ENSG00000243467	RP11-216C10.1		20	22528309	22541562	3.30786	0	0	0	0	0	0	0.31496	10.0577	0	0	0	0	0	0	0	0	3.22735	0
ENSG00000237461	RP11-554F20.1		9	102348068	102582171	4.8178	5.42591	0	0	0	0	0	0	0	0	0	0	0	1.73888	0	0	0	2.9228	1.996
ENSG00000197670	RP4-724E16.2		20	52169309	52191847	0	0	0.901572	0	0	0	15.0811	0.911494	0	0	0	0	0	0	0	0	0	0	0
ENSG00000229243	AC098973.1		3	27872379	27875627	0	1.8741	0.845078	0	0	0	0	0	0	9.27833	0	0	0	0	0	0	0	0	4.88932
ENSG00000254691	RP11-91P24.5		11	77561650	77562557	1.76867	3.87024	0	0	0	0	0	7.33045	0	0	0	0	0	1.94071	0	0	0	0	1.93671
ENSG00000250938	RP11-679C8.2		4	120988113	121337921	0	1.8741	0	0	0	0	0	0.497911	0	0	0	0	0	0	0	0	8.6253	5.84559	0
ENSG00000233399	RP11-111I12.1		1	30486799	30510459	0	0.934085	0	0	0	0	0	1.12689	0	0	0	0	0	0	0	0	0	0	14.7811
ENSG00000244997	AC020928.1		19	37264055	37267978	1.09094	1.11618	8.30126	0	0	0	0	3.35275	0	0	0	0	0	0.789322	0	0	0	2.14337	0
ENSG00000232564	RP4-591N18.2		22	40917804	40922711	0	1.27533	1.79083	0	0	0	0	0.326856	0	0	0	0	0	2.74212	0	0	8.6253	0	1.96742
[truncated: 635 more rows]
