# Supplementary material for: Human Cancer Long Non-Coding RNA Transcriptomes
Source: PLoS One. 2011 Oct 3;6(10):e25915. doi: 10.1371/journal.pone.0025915 (PMC3185064; doi:10.1371/journal.pone.0025915)
Supplement: Table S8 — Expression validation by BodyMap RNASeq. (XLSX) [file pone.0025915.s011.xlsx]

## Sheet: BodyMap RNAseq
Supplementary Table 8 - Expression of lncRNAs in BodyMap RNAseq (Ensembl)
LncRNA Query		Read Coverage (Ensembl RNASeq Track)																Validation
Ensembl ID	LncRNA	Apidose	Adrenal	Blood	Brain	Breast	Colon	Heart	Kidney	Liver	Lung	Lymph	Ovary	Prostate	Skeletal Muscle	Testes	Thyroid	Total	Validates
ENSG00000245532	NEAT1	27	25	1	2	102	7	3	132	20	47	15	132	81	8	20	11	14/16	Yes
ENSG00000251562	MALAT1	40	44	1	128	57	13	119	344	7	31	8	35	32	102	68	255	15/16	Yes
ENSG00000175061	NCRNA00188	1166	324	939	80	607	482	230	287	306	1033	1189	1108	1245	419	374	753	16/16	Yes
ENSG00000234741	GAS5	13	7	6	7	12	12	6	19	13	7	7	21	6	32	6	10	16/16	Yes
ENSG00000225759	RP11-425M5.7	ND	ND	ND	ND	ND	ND	ND	ND	ND	ND	ND	ND	ND	ND	ND	ND	0/16	No
ENSG00000245910	SNHG6	32	891	274	78	537	1039	62	36	11616	550	333	79	239	117	41	891	16/16	Yes
ENSG00000203875	SNHG5	326	722	1478	269	292	843	196	362	773	822	1343	1083	1227	794	928	887	16/16	Yes
ENSG00000230513	AC002472.9	35	19	7	3	12	0	3	0	6	1	13	8	21	0	33	10	12/16	No
ENSG00000246638	AC104759.1	0	0	0	0	0	0	0	0	563	0	1	0	0	0	0	0	1/16	No
ENSG00000229807	XIST	13	1	0	11	35	5	1	31	0	0	54	51	0	0	0	85	8/8*	Yes
ENSG00000214548	MEG3	0	5	0	54	13	1	1	13	6	8	14	59	13	3	12	11	12/16	No
ENSG00000176700	SCAND2	16	11	8	23	6	10	8	34	1	7	26	11	33	0	7	12	14/16	Yes
ENSG00000225733	AC090937.2	3	1	0	2	1	1	1	8	552	1	1	0	0	15	7	4	6/16	No
ENSG00000130600	H19	89	131	11	2	78	99	92	58	901398	94	83	236	197	1238	265	268	15/16	Yes
ENSG00000175701	NCRNA00116	95	213	125	182	170	239	299	275	11860	122	189	103	307	416	213	219	16/16	Yes
ENSG00000222041	NCRNA00152	48	105	115	12	29	19	12	36	15	152	80	10	30	1	3	41	15/16	Yes
ENSG00000250682	CTD-2340E1.3	ND	ND	ND	ND	ND	ND	ND	ND	ND	ND	ND	ND	ND	ND	ND	ND	0/16	No
ENSG00000232388	RP11-379J5.2	40	42	168	54	97	98	194	72	223	158	123	67	332	258	81	41	16/16	Yes
ENSG00000224812	RP11-18M11.2	ND	ND	ND	ND	ND	ND	ND	ND	ND	ND	ND	ND	ND	ND	ND	ND	0/16	No
ENSG00000230925	RP11-176F3.7	504	257	51	20	308	61	22	158	170	430	28	487	389	39	1174	11	16/16	Yes
	Gender	Female	Male	Male	Female	Female	Female	Male	Female	Male	Male	Female	Female	Male	Male	Male	Female	Total = 13
*XIST is female specific, high expression is not expected in male samples
ND = No data
