# Supplementary material for: Human Cancer Long Non-Coding RNA Transcriptomes
Source: PLoS One. 2011 Oct 3;6(10):e25915. doi: 10.1371/journal.pone.0025915 (PMC3185064; doi:10.1371/journal.pone.0025915)
Supplement: Table S12 — ESC and cancers. (XLSX) [file pone.0025915.s015.xlsx]

## Sheet: ESC and cancer lncRNAs
Supplementary Table 12 - LncRNAs expressed in embryonic stem cells and upregulated in cancer
LncRNA		Cancer Fold Change
Ensembl Gene ID	Associated Gene Name	BRAIN	BREAST	Esophagus	Gall Bladder	Liver	Lung	Lymph Node	Muscle	Prostate	Retina	Stomach	Thyroid
ENSG00000248470	AL356752.1	0.25431	0.0802418	1	1	1	3.4351	1	1	1	1	3.22872	1
ENSG00000245923	AC108134.4	0.147759	1	1	1	1	1.0257	1	1	1	1	41.3063	1
ENSG00000249601	CTB-27N1.1	1.589	0.978621	1	1	1	0.868689	1	16.3212	1	1.01417	1	1
ENSG00000256994	RP11-871F6.3	0.629424	1	1	1	1	0.827964	1	1	1	0.509573	87.9573	8.93311
ENSG00000236094	RP11-252M21.1	0.434838	4.32042	1	1	1	5.73491	1	1	1	1	1	1
ENSG00000232301	RP11-132A1.3	2.34694	0.996159	17.7247	1	82.8926	0.111983	1	1	1	0.473097	1	4.92233
ENSG00000253298	AC008703.1	2.68543	1.37055	4.45014	1	1	0.711728	1	1	1	1.01417	1.77846	1
ENSG00000235862	RP11-338C15.5	0.487893	1.10757	1	1	1	0.692598	1	1	1	1	1	4.01078
ENSG00000232445	RP11-132A1.4	0.638524	0.993621	1	1	1	1.94159	1	1	0.970076	1	1	4.01078
ENSG00000198468	NCRNA00292	0.765019	1.04903	1	4.09601	16.5785	0.396473	13.8873	1	1	0.154164	1.77846	4.01078
ENSG00000224137	AC079767.4	0.528582	0.953544	4.24029	1	0.066308	3.40436	1	1	1	8.73116	4.61143	1
ENSG00000234787	RP11-168P6.1	1.12955	2.10924	0.075634	1	16.5785	1.78922	13.8873	1	1	0.187592	1	13.8554
ENSG00000255955	AL136362.1	2.55034	1.11271	1	1	1	0.346418	1	1	1	0.117581	5.79579	0.570685
ENSG00000241836	AC073321.5	2.13111	3.62388	1	4.09601	1	9.13267	13.8873	16.3212	0.128116	11.3007	2.64236	1
ENSG00000253250	RP11-122A3.2	0.48672	0.461192	1	1	1	1.08961	0.099426	48.9636	1	10.5113	1	8.93311
ENSG00000248329	RP11-366M4.3	4.96867	0.294048	17.7917	1	1	0.783677	0.099426	1	1	0.186623	1	2.28274
ENSG00000254551	RP11-727A23.7	2.29102	0.542921	1	4.09601	0.066308	6.8436	13.8873	1	0.128116	33.9021	27.4702	1
ENSG00000215866	RP11-426L16.8	1.61279	2.11738	4.24029	1	1.09929	3.14283	1	0.107894	1	0.183962	8.23591	4.01078
ENSG00000235770	AC122136.1	1.28845	0.221223	4.51714	1	16.5785	0.130271	0.049713	1	1	1.62498	58.5873	4.01078
ENSG00000248255	AC126775.1	4.06199	0.854274	4.24029	4.09601	1	0.0172975	1	1	1	0.340557	1	0.570685
ENSG00000236673	RP11-69I8.2	2.95359	1.30007	9.03428	1.64313	16.5785	1.48349	1	16.3212	7.57186	0.205041	1	0.930004
ENSG00000233587	AC096570.1	4.2365	0.675556	8.75743	4.97602	1	1.30984	97.2114	32.6424	0.059277	10.9144	11.3971	0.115938
ENSG00000234608	C12orf47	0.710221	2.77957	1	21.5077	1	0.481452	0.099426	0.879533	3.92883	0.515275	5.40004	9.84465
ENSG00000226963	AC078883.4	1.55441	1.96109	0.075634	4.09601	1	1.02472	1	1.76096	2.72296	10.6186	8.5888	8.02156
ENSG00000234171	AC108488.3	4.13309	0.438836	13.2746	19.0241	1.09929	1.0232	1.38076	32.6424	7.57186	1.79394	6.78564	2.43069
ENSG00000232117	RP11-490N5.2	1.91297	1.20068	0.32071	1.50495	1	0.799101	0.049713	1.76096	2.94258	1.31423	5.03188	1.86001
ENSG00000254304	RP11-1049H7.1	1.53726	1.4263	0.336582	12.5834	1	1.27071	69.4367	16.3212	6.29869	7.89627	0.725912	0.465002
ENSG00000121446	RGSL1	1.68014	0.9471	8.90028	4.09601	1	0.780088	5.52305	2.64002	15.27	0.100326	44.9237	0.232501
ENSG00000225376	RP11-490D19.6	2.4733	0.74948	2.0499	2.1696	0.066308	1.21251	1.38076	1.76096	1	2.37215	1	0.930004
ENSG00000236648	RP11-473A10.2	0.129263	0.0594427	1	1	1	0.413944	0.049713	16.3212	0.448837	0.0463811	4.51046	1
ENSG00000233104	RP11-432J9.4	1.86312	2.52798	1.31965	0.777527	0.066308	0.34607	1	16.3212	1.94015	10.6833	21.4708	0.057969
ENSG00000253972	RP11-4K16.2	1.38257	0.291938	0.657292	0.085706	2.19858	1.8642	0.033142	1	7.57186	1.00769	10.4825	0.570685
ENSG00000254162	RP11-48B3.3	0.545088	1.20589	2.38648	19.9041	49.7356	0.95062	0.0198852	16.3212	15.1437	0.897249	6.73505	2.53637
ENSG00000236120	RP11-733O18.1	1.40899	1.60327	0.33118	26.7791	49.7356	2.31704	1	16.3212	0.128116	5.41985	6.38989	0.803186
ENSG00000250748	RP11-230G5.2	2.35915	3.36245	0.998941	16.6794	0.066308	0.689918	13.8873	0.879533	1.80283	1.19919	11.4218	0.285342
ENSG00000249715	AC068539.1	1.08317	1.81756	8.96728	0.178691	1	0.304704	13.8873	0.053947	0.118554	0.0560789	9.61862	0.750344
ENSG00000205682	RP11-798L4.1	16.5781	0.445423	0.219097	5.12887	0.066308	1.45494	13.8873	1	1.47938	4.75401	1.56644	1.03569
ENSG00000245410	AC132872.3	4.03622	0.785898	0.491535	35.1188	1	1.36465	0.099426	0.0359389	0.986251	0.0285473	7.1785	1.73319
ENSG00000250666	RP11-463J17.1	2.9429	1.15428	0.978002	0.618666	1	0.719803	2.07114	16.3212	0.897674	8.77369	4.34553	4.14275
ENSG00000231025	RP11-175O19.4	3.72796	1.54607	4.24029	0.799361	1	0.919016	0.690382	16.3212	7.69811	0.148118	1.22405	0.285342
ENSG00000248743	AL590365.1	1.43802	0.491569	0.075634	9.07203	16.5785	5.84166	13.8873	32.6424	0.448837	1.10645	7.9671	0.828549
ENSG00000235954	TTC28-AS1	1.16438	1.32215	0.683299	1.14124	0.066308	2.21725	0.049713	0.107894	38.238	2.21754	1.15601	0.65523
ENSG00000237914	RP11-77C3.3	1.6211	2.12617	0.489001	17.264	1	0.580155	0.099426	16.3212	0.448837	0.0696718	0.288455	0.465002
ENSG00000237463	RP11-280O1.2	3.09025	1.12522	4.24029	0.0214265	1	5.15475	1	19.3497	7.57186	0.163341	0.207807	0.019323
ENSG00000245937	CTC-228N24.3	1.31835	0.840609	4.24029	1.0348	66.3141	0.448355	13.8873	0.107894	0.897674	0.492212	0.862233	1.73319
ENSG00000247556	AC012652.1	3.78257	0.693101	1.62449	1.68047	0.549644	2.45553	5.52305	0.440003	0.986251	3.23467	0.400871	16.0431
ENSG00000249604	RP11-286E11.2	6.10228	1.20664	12.7209	1.81233	1	1.06046	0.460254	0.053918	0.978164	2.40218	2.25293	1.32103
ENSG00000253518	CTD-2031P19.4	1.32813	0.808765	0.0189085	2.56456	1	0.766032	1.38076	3.52192	1.95633	1.49018	16.3537	0.232501
ENSG00000256880	AC112484.1	1.81369	0.542459	0.214831	17.4117	33.157	5.92751	1	1	1	0.834722	9.82086	8.93311
ENSG00000246526	RP11-539L10.2	2.07778	0.283724	0.075634	14.928	0.219858	0.7158	0.690382	3.52192	30.4137	1.04872	0.187039	0.750344
ENSG00000227955	RP11-305E6.1	1.89414	0.876186	17.7247	2.92256	1	0.305225	2.76153	16.3212	0.940246	2.39072	0.191543	1.4866
ENSG00000175873	AC004840.9	0.791591	1.28787	1.97717	24.8714	0.066308	1.12589	97.2114	1	1.94015	0.0403999	10.5342	4.01078
ENSG00000248872	RP11-344G13.1	0.461047	0.674931	8.48058	2.91575	16.5785	0.403083	1.38076	1.17313	1.45916	0.553418	13.1249	2.21228
ENSG00000233985	RP11-297H3.3	1.06124	1.34457	13.2076	2.95979	0.066308	0.536021	0.276153	16.3212	0.314893	0.311735	1.30874	0.797901
ENSG00000225783	MIAT	0.219259	1.86729	0.662359	0.426474	1	1.09958	0.690382	0.107894	0.986251	0.0115375	0.513541	0.115938
ENSG00000196756	RP4-564F22.2	2.09275	1.68755	0.33298	4.70239	0.033154	1.33819	6.90382	48.9636	1.00844	1.62914	1.48415	1.9287
ENSG00000255717	SNHG1	2.27086	1.98499	57.6913	1.66803	0.066308	2.71746	11.3913	6.16336	1.20052	8.76722	2.29878	1.69092
ENSG00000130600	H19	0.601718	0.0835837	0.0151268	16.6794	8.79431	3.67052	13.8873	2.5145	1	0.00535885	23.4684	1.71205
ENSG00000248272	AL593851.1	2.68332	1.48581	0.0754904	4.31337	0.066308	0.893916	55.5494	32.6424	0.93081	5.49486	10.1413	1.04802
ENSG00000224812	RP11-18M11.2	1.57381	1.78566	0.818914	1.0052	0.066308	2.44288	9.38919	1.31983	0.478604	0.330238	6.41473	0.286155
ENSG00000225759	RP11-425M5.7	1.54441	1.80995	1.14189	2.36439	0.033154	1.50198	17.0294	1.36375	1.01641	1.52663	6.14349	0.861898
	Count:	23	8	22	29	13	15	22	25	13	18	35	19
